# Supplementary material for: Applying Petroleum Pressure Buildup Well Test Procedure on Thermal Response Test&mdash;A Novel Method to Improve Accuracy of Thermal Conductivity Determination
Source: Preprints.org preprint supplement (doi:10.20944/preprints201712.0006.v1), 2017-12-01
Supplement: Supplementary file 3 [file supplementary]

## Sheet: Sheet2
DHMZ RH Sluzba za opcu meteorologiju POSTAJA ZAGREB GRIC (236)
ODJEL ZA OBRADU I KONTROLU PODATAKA I KLIMATSKE PODLOGE MJESEC SIJECANJ 1
SATNE VRIJEDNOSTI TEMPERATURE ZRAKA (ST.C) ( LIST 1 ) GODINA 2016
SIRINA 45 49 N
IZVOR Termograf IZRADA BROJ VISINA m DULJINA 15 59 E
VISINA 157 m
	----	-----	-----	-----	-----	-----	-----	-----	-----	-----	-----	-----	-----
	*SAT
	*	1	2	3	4	5	6	7	8	9	10	11	12
	DAN*
	----	-----	-----	-----	-----	-----	-----	-----	-----	-----	-----	-----	-----
	1	-1.7	-1.7	-1.4	-1.2	-1.6	-1.7	-2.0	-1.6	-1.4	-1.4	-1.1	-0.1
	2	-0.4	-0.3	-0.1	-0.1	-0.7	-0.8	-0.2	0.2	0.7	0.9	1.4	1.7
	3	-2.4	-2.6	-2.7	-3.0	-3.1	-3.3	-3.3	-3.3	-3.6	-3.4	-3.3	-3.0
	4	-4.5	-4.6	-4.8	-5.1	-5.3	-5.6	-5.8	-6.0	-5.8	-6.4	-6.5	-6.4
	5	-5.1	-5.0	-5.1	-5.0	-5.0	-5.0	-4.8	-4.9	-4.7	-4.0	-3.5	-3.1
	6	-0.1	-0.1	0.0	0.0	0.2	0.5	0.6	0.6	0.8	0.9	0.9	0.9
	7	0.7	0.8	0.8	0.8	-0.1	1.1	2.0	0.7	-0.6	0.7	2.7	3.1
	8	-1.0	-1.1	-1.1	-1.7	-2.0	-2.3	-2.5	-2.0	-1.0	-0.4	0.1	1.2
	9	2.1	1.9	2.0	2.0	2.5	2.7	2.6	2.2	2.5	2.8	3.7	4.2
	10	4.0	4.4	5.5	5.4	4.4	3.9	3.9	4.2	4.0	4.8	5.9	6.1
	11	5.7	5.8	6.3	5.6	6.7	7.9	8.0	8.9	9.1	11.2	13.0	13.7
	12	6.5	6.0	5.8	5.8	5.8	5.9	6.3	6.7	6.3	6.1	7.8	7.7
	13	5.5	5.0	4.9	5.1	4.9	4.5	4.4	4.8	6.5	5.8	6.0	7.7
	14	3.0	2.8	2.4	1.8	1.9	1.8	1.8	0.6	1.4	2.6	4.5	5.5
	15	5.2	4.8	4.6	4.5	4.4	4.3	4.2	4.3	4.9	4.9	4.6	5.3
	16	1.7	1.4	1.2	0.7	0.4	0.1	-0.5	-0.7	-0.7	-0.8	0.0	0.4
	17	1.1	0.6	0.4	0.4	0.2	-0.5	-1.1	-1.3	-0.8	0.8	1.9	2.4
	18	-1.6	-1.8	-2.0	-2.2	-2.4	-2.4	-3.0	-3.0	-2.2	-1.5	-1.2	-0.4
	19	-2.8	-3.3	-4.3	-4.7	-5.1	-5.2	-5.4	-5.3	-5.1	-4.0	-2.2	-1.5
	20	-3.1	-3.6	-3.9	-4.5	-4.8	-4.6	-4.0	-3.8	-3.0	-2.7	-1.8	-0.6
	21	-0.9	-1.1	-1.4	-1.6	-1.8	-2.3	-2.5	-2.4	-2.4	-1.0	1.0	3.0
	22	-1.7	-1.6	-1.7	-1.6	-1.6	-1.7	-2.0	-2.3	-2.2	-1.2	-0.4	0.3
	23	-2.2	-2.6	-2.9	-3.7	-4.0	-4.6	-4.8	-4.7	-4.3	-3.1	-2.1	-1.8
	24	-2.8	-3.3	-3.8	-4.3	-4.6	-4.6	-4.5	-4.6	-4.1	-2.9	-1.1	0.7
	25	2.5	2.0	2.0	1.8	1.8	1.6	1.3	1.2	1.3	2.0	2.5	3.4
	26	2.9	2.4	2.2	2.2	2.0	1.8	1.6	1.7	1.8	3.3	5.5	7.3
	27	5.0	4.0	3.4	3.1	2.6	2.3	2.2	1.9	2.2	4.2	7.2	9.2
	28	7.6	8.0	8.0	8.1	8.5	9.5	8.4	9.0	9.8	12.1	13.4	14.3
	29	7.7	7.8	7.8	7.9	7.7	7.5	6.9	6.5	6.8	9.3	11.9	11.7
	30	6.9	6.8	5.7	5.2	4.9	4.3	4.2	4.3	5.1	6.3	7.2	9.5
	31	11.5	12.2	12.1	12.1	12.5	12.4	11.9	12.7	12.6	12.3	12.5	12.8
	====	=====	=====	=====	=====	=====	=====	=====	=====	=====	=====	=====	=====
	SRED	1.6	1.4	1.3	1.1	0.9	0.9	0.8	0.8	1.1	1.9	2.9	3.7
	----	-----	-----	-----	-----	-----	-----	-----	-----	-----	-----	-----	-----
	STD	4.1	4.2	4.2	4.3	4.5	4.6	4.5	4.6	4.7	4.8	5.1	5.2
	----	-----	-----	-----	-----	-----	-----	-----	-----	-----	-----	-----	-----
	MAKS	11.5	12.2	12.1	12.1	12.5	12.4	11.9	12.7	12.6	12.3	13.4	14.3
	----	-----	-----	-----	-----	-----	-----	-----	-----	-----	-----	-----	-----
	MIN	-5.1	-5.0	-5.1	-5.1	-5.3	-5.6	-5.8	-6.0	-5.8	-6.4	-6.5	-6.4
	----	-----	-----	-----	-----	-----	-----	-----	-----	-----	-----	-----	-----
	N.P.	0	0	0	0	0	0	0	0	0	0	0	0
	====	=====	=====	=====	=====	=====	=====	=====	=====	=====	=====	=====	=====
DHMZ RH Sluzba za opcu meteorologiju POSTAJA ZAGREB GRIC (236)
ODJEL ZA OBRADU I KONTROLU PODATAKA I KLIMATSKE PODLOGE MJESEC SIJECANJ 1
SATNE VRIJEDNOSTI TEMPERATURE ZRAKA (ST.C) ( LIST 2 ) GODINA 2016
SIRINA 45 49 N
IZVOR Termograf IZRADA BROJ VISINA m DULJINA 15 59 E
VISINA 157 m
	----	-----	-----	-----	-----	-----	-----	-----	-----	-----	-----	-----	-----	-----	-----	-----	-----	-----	-----	-----	-----	----
	*SAT
	*	13	14	15	16	17	18	19	20	21	22	23	24	SRED-	STAN.	MAKS.	MIN.	AMPL.	MAKS.	MIN.	AMPL.	BR.
	DAN*													NJAK	DEV.	1*	1*	2*	3*	3*	4*	N.P.
	----	-----	-----	-----	-----	-----	-----	-----	-----	-----	-----	-----	-----	-----	-----	-----	-----	-----	-----	-----	-----	----
	1	0.1	0.6	0.7	0.7	0.1	-0.1	-0.2	-0.5	-0.9	-0.9	-0.6	-0.4	-0.8	0.8	0.7	-2.0	2.7	0.8	-2.0	2.8	0
	2	1.6	1.4	0.6	0.4	0.3	0.3	0.1	-0.3	-0.7	-1.3	-1.6	-2.1	0.0	1.0	1.7	-2.1	3.8	1.7	-2.1	3.8	0
	3	-3.1	-3.3	-3.4	-3.4	-3.5	-4.0	-4.2	-4.1	-4.2	-4.3	-4.3	-4.4	-3.5	0.6	-2.4	-4.4	2.0	-2.1	-4.4	2.3	0
	4	-6.2	-6.1	-5.7	-5.6	-5.8	-6.1	-6.0	-5.5	-5.5	-5.4	-5.3	-5.2	-5.6	0.5	-4.5	-6.5	2.0	-4.4	-6.5	2.1	0
	5	-2.5	-2.2	-2.1	-1.8	-1.8	-1.6	-1.4	-1.2	-1.0	-0.8	-0.6	-0.4	-3.0	1.7	-0.4	-5.1	4.7	-0.4	-5.2	4.8	0
	6	1.0	1.0	0.9	0.7	0.6	0.0	-0.2	-0.1	-0.1	-0.1	0.0	0.3	0.4	0.4	1.0	-0.2	1.2	1.0	-0.4	1.4	0
	7	2.1	2.1	2.4	2.0	1.1	-0.1	-0.5	-0.7	-0.6	-0.4	-0.2	-0.5	0.8	1.1	3.1	-0.7	3.8	3.1	-0.7	3.8	0
	8	2.1	2.2	3.5	3.8	3.4	3.4	2.9	3.3	3.1	2.9	2.9	2.6	0.9	2.2	3.8	-2.5	6.3	3.8	-2.5	6.3	0
	9	4.8	5.0	5.4	5.5	4.8	4.5	4.6	4.5	4.2	4.0	4.5	4.2	3.6	1.2	5.5	1.9	3.6	5.5	1.9	3.6	0
	10	6.9	7.3	7.6	7.5	7.1	6.3	5.7	6.2	6.2	6.0	5.8	6.0	5.6	1.2	7.6	3.9	3.7	7.7	3.8	3.9	0
	11	15.5	15.4	14.5	14.0	13.4	12.5	12.7	12.2	12.0	11.9	10.2	8.3	10.6	3.2	15.5	5.6	9.9	15.5	5.5	10.0	0
	12	8.9	10.0	10.9	11.8	11.7	11.0	9.6	9.1	7.8	7.5	6.7	5.7	7.8	2.0	11.8	5.7	6.1	11.9	5.7	6.2	0
	13	8.6	9.1	9.8	9.6	9.2	8.2	7.6	7.5	7.0	5.9	4.6	4.2	6.5	1.8	9.8	4.2	5.6	9.8	4.1	5.7	0
	14	6.5	7.0	7.0	6.7	6.3	5.8	5.5	5.6	5.2	5.1	5.1	5.3	4.2	2.0	7.0	0.6	6.4	7.2	0.6	6.6	0
	15	4.6	4.5	4.4	4.3	3.9	3.5	3.0	2.7	2.5	2.4	2.4	2.3	4.0	0.9	5.3	2.3	3.0	5.4	2.3	3.1	0
	16	2.0	3.8	4.2	4.2	3.4	2.6	2.2	2.0	2.0	1.9	1.5	1.3	1.4	1.5	4.2	-0.8	5.0	4.3	-0.8	5.1	0
	17	2.6	3.0	3.2	2.7	2.4	2.1	2.0	0.8	0.2	-0.3	-0.6	-1.1	0.9	1.4	3.2	-1.3	4.5	3.3	-1.3	4.6	0
	18	0.2	0.4	0.5	0.4	-0.4	-0.8	-1.5	-2.1	-2.4	-2.5	-2.6	-2.8	-1.6	1.1	0.5	-3.0	3.5	0.5	-3.0	3.5	0
	19	-1.1	-0.4	0.3	0.0	-0.4	-0.7	-1.1	-1.3	-1.3	-1.6	-2.1	-2.5	-2.5	1.9	0.3	-5.4	5.7	0.3	-5.4	5.7	0
	20	0.6	1.5	2.0	2.0	1.4	1.2	0.7	0.3	0.1	0.0	0.0	-0.7	-1.3	2.3	2.0	-4.8	6.8	2.3	-4.8	7.1	0
	21	4.0	4.6	4.6	3.5	2.4	1.6	1.3	0.7	0.2	-0.4	-0.9	-1.5	0.3	2.3	4.6	-2.5	7.1	4.6	-2.8	7.4	0
	22	1.4	1.7	1.8	1.4	1.0	0.0	-0.8	-1.0	-1.2	-1.4	-1.7	-1.9	-0.8	1.3	1.8	-2.3	4.1	1.9	-2.3	4.2	0
	23	-1.3	-0.8	-0.7	-0.5	-0.7	-0.8	-0.9	-1.5	-1.6	-1.7	-1.9	-2.4	-2.3	1.4	-0.5	-4.8	4.3	-0.5	-4.8	4.3	0
	24	2.5	4.4	5.7	5.6	5.7	4.7	4.5	3.6	4.2	4.2	3.8	3.6	0.5	4.1	5.7	-4.6	10.3	5.7	-4.6	10.3	0
	25	5.2	6.2	6.6	6.5	6.6	6.1	6.0	5.1	4.5	3.8	3.4	3.1	3.6	1.9	6.6	1.2	5.4	6.7	1.2	5.5	0
	26	9.8	11.2	12.3	12.2	11.6	10.1	9.1	9.1	8.2	7.4	6.7	5.9	6.2	3.8	12.3	1.6	10.7	12.4	1.6	10.8	0
	27	12.3	13.1	14.0	14.1	13.9	12.3	11.0	9.9	9.7	9.0	8.8	7.9	7.6	4.3	14.1	1.9	12.2	14.2	1.7	12.5	0
	28	15.4	15.8	16.0	15.4	14.6	13.0	12.7	11.2	10.2	9.5	8.8	8.2	11.1	2.9	16.0	7.6	8.4	16.0	7.5	8.5	0
	29	13.0	14.0	14.0	13.9	13.1	11.7	10.8	10.8	10.1	10.2	9.0	7.8	9.9	2.5	14.0	6.5	7.5	14.0	6.3	7.7	0
	30	10.6	10.9	11.6	12.2	12.2	11.3	10.8	10.7	11.1	11.1	11.0	11.1	8.5	2.9	12.2	4.2	8.0	12.2	4.1	8.1	0
	31	13.1	13.4	13.5	13.3	13.0	12.0	9.8	9.1	8.8	8.8	8.8	8.5	11.7	1.6	13.5	8.5	5.0	13.7	8.5	5.2	0
	====	=====	=====	=====	=====	=====	=====	=====	=====	=====	=====	=====	=====	=====	=====	=====	=====	=====	=====	=====	=====	====
	SRED	4.6	5.1	5.4	5.3	4.9	4.2	3.7	3.4	3.2	2.9	2.6	2.3	2.7	1.9	5.7	0.1	5.6	5.7	0.0	5.7
	----	-----	-----	-----	-----	-----	-----	-----	-----	-----	-----	-----	-----	-----	-----	-----	-----	-----	-----	-----	-----	----
	STD	5.5	5.6	5.7	5.7	5.7	5.3	5.1	4.9	4.8	4.7	4.5	4.3
	----	-----	-----	-----	-----	-----	-----	-----	-----	-----	-----	-----	-----	-----	-----	-----	-----	-----	-----	-----	-----	----
	MAKS	15.5	15.8	16.0	15.4	14.6	13.0	12.7	12.2	12.0	11.9	11.0	11.1
	----	-----	-----	-----	-----	-----	-----	-----	-----	-----	-----	-----	-----	-----	-----	-----	-----	-----	-----	-----	-----	----
	MIN	-6.2	-6.1	-5.7	-5.6	-5.8	-6.1	-6.0	-5.5	-5.5	-5.4	-5.3	-5.2
	----	-----	-----	-----	-----	-----	-----	-----	-----	-----	-----	-----	-----	-----	-----	-----	-----	-----	-----	-----	-----	----
	N.P.	0	0	0	0	0	0	0	0	0	0	0	0									0
	====	=====	=====	=====	=====	=====	=====	=====	=====	=====	=====	=====	=====	=====	=====	=====	=====	=====	=====	=====	=====	====
1* IZ SATNIH VRIJEDNOSTI 1-24, 2* IZ SATNIH EKSTREMA, 3* PO DIJAGRAMU, 4* IZ EKSTREMA PO DIJAGRAMU
N.P. - BROJ NEDOSTAJUCIH PODATAKA
DHMZ RH Sluzba za opcu meteorologiju POSTAJA ZAGREB GRIC (236)
ODJEL ZA OBRADU I KONTROLU PODATAKA I KLIMATSKE PODLOGE MJESEC VELJACA 2
SATNE VRIJEDNOSTI TEMPERATURE ZRAKA (ST.C) ( LIST 1 ) GODINA 2016
SIRINA 45 49 N
IZVOR Termograf IZRADA BROJ VISINA m DULJINA 15 59 E
VISINA 157 m
	----	-----	-----	-----	-----	-----	-----	-----	-----	-----	-----	-----	-----
	*SAT
	*	1	2	3	4	5	6	7	8	9	10	11	12
	DAN*
	----	-----	-----	-----	-----	-----	-----	-----	-----	-----	-----	-----	-----
	1	8.1	7.6	7.5	7.4	7.5	9.3	12.0	12.5	12.7	13.6	14.9	15.6
	2	11.7	11.0	10.7	10.7	10.8	10.3	10.5	10.3	11.0	12.0	12.9	13.9
	3	13.4	13.4	13.3	13.3	13.3	13.2	13.0	13.0	12.8	12.9	12.9	13.4
	4	2.0	2.2	2.9	2.9	3.6	3.5	3.4	3.4	3.5	3.2	5.1	5.9
	5	3.0	2.8	2.0	1.7	1.3	0.7	0.6	0.9	2.0	3.7	5.8	7.5
	6	3.0	2.6	2.1	2.0	1.8	1.1	0.9	1.1	1.9	3.9	5.8	7.8
	7	6.3	6.5	7.0	6.9	7.0	6.8	7.2	7.4	7.8	8.9	9.8	11.1
	8	9.4	9.3	9.0	8.8	8.8	9.2	9.0	9.4	10.0	10.9	11.0	11.6
	9	11.1	11.5	11.9	11.6	11.1	10.6	10.7	10.8	11.7	12.9	13.9	14.0
	10	10.8	10.8	10.9	11.0	11.2	12.0	9.6	9.1	4.8	4.7	4.5	6.1
	11	2.8	3.2	3.1	2.8	2.8	2.0	1.3	1.2	2.2	3.6	4.3	6.2
	12	4.3	3.4	3.5	2.5	1.9	1.9	2.0	2.4	2.8	4.0	4.6	3.8
	13	3.5	3.6	4.0	4.2	4.7	4.7	4.2	3.5	2.8	2.7	2.5	4.8
	14	6.7	6.4	5.9	5.9	5.1	5.0	4.5	4.8	6.2	7.8	8.2	9.1
	15	6.0	6.4	6.8	6.3	6.2	6.8	7.2	7.2	7.4	8.0	7.8	7.4
	16	5.2	5.4	5.5	5.5	5.6	5.4	5.7	5.9	6.5	6.9	7.0	6.9
	17	4.6	5.0	5.2	5.2	5.2	5.1	5.0	5.1	5.2	5.3	5.4	5.5
	18	5.0	5.0	5.0	4.8	4.5	4.4	4.3	4.5	4.9	5.4	5.8	5.4
	19	5.5	5.6	5.6	5.8	6.0	5.9	6.1	6.1	6.0	6.1	6.8	6.9
	20	4.7	4.6	4.6	4.7	4.3	4.5	5.0	5.1	4.9	5.9	6.2	6.6
	21	4.6	4.8	4.7	6.0	5.8	5.1	4.7	4.8	5.9	8.9	9.8	10.3
	22	10.1	10.0	10.2	10.0	10.2	10.2	10.1	10.4	10.9	11.4	12.0	14.0
	23	11.6	11.8	12.3	12.3	12.4	12.1	11.3	11.7	11.8	13.0	13.0	14.9
	24	11.3	8.6	6.9	5.8	4.9	4.7	3.9	3.8	4.0	4.2	6.2	5.8
	25	4.3	4.2	3.9	3.2	3.3	3.4	3.3	2.4	2.6	2.7	2.8	2.9
	26	4.0	3.6	3.8	3.1	2.8	2.3	2.2	2.2	2.2	2.4	2.6	4.0
	27	1.3	1.1	0.9	0.8	0.3	0.3	0.3	1.2	2.0	3.4	4.5	5.3
	28	4.9	4.4	4.3	4.3	4.2	4.3	4.4	4.5	5.2	5.5	6.2	6.6
	29	7.4	7.8	8.1	8.5	8.1	7.8	7.2	7.0	7.4	7.8	8.0	9.3
	====	=====	=====	=====	=====	=====	=====	=====	=====	=====	=====	=====	=====
	SRED	6.4	6.3	6.3	6.1	6.0	6.0	5.8	5.9	6.2	7.0	7.6	8.4
	----	-----	-----	-----	-----	-----	-----	-----	-----	-----	-----	-----	-----
	STD	3.3	3.2	3.3	3.3	3.4	3.6	3.6	3.6	3.5	3.6	3.5	3.6
	----	-----	-----	-----	-----	-----	-----	-----	-----	-----	-----	-----	-----
	MAKS	13.4	13.4	13.3	13.3	13.3	13.2	13.0	13.0	12.8	13.6	14.9	15.6
	----	-----	-----	-----	-----	-----	-----	-----	-----	-----	-----	-----	-----
	MIN	1.3	1.1	0.9	0.8	0.3	0.3	0.3	0.9	1.9	2.4	2.5	2.9
	----	-----	-----	-----	-----	-----	-----	-----	-----	-----	-----	-----	-----
	N.P.	0	0	0	0	0	0	0	0	0	0	0	0
	====	=====	=====	=====	=====	=====	=====	=====	=====	=====	=====	=====	=====
DHMZ RH Sluzba za opcu meteorologiju POSTAJA ZAGREB GRIC (236)
ODJEL ZA OBRADU I KONTROLU PODATAKA I KLIMATSKE PODLOGE MJESEC VELJACA 2
SATNE VRIJEDNOSTI TEMPERATURE ZRAKA (ST.C) ( LIST 2 ) GODINA 2016
SIRINA 45 49 N
IZVOR Termograf IZRADA BROJ VISINA m DULJINA 15 59 E
VISINA 157 m
	----	-----	-----	-----	-----	-----	-----	-----	-----	-----	-----	-----	-----	-----	-----	-----	-----	-----	-----	-----	-----	----
	*SAT
	*	13	14	15	16	17	18	19	20	21	22	23	24	SRED-	STAN.	MAKS.	MIN.	AMPL.	MAKS.	MIN.	AMPL.	BR.
	DAN*													NJAK	DEV.	1*	1*	2*	3*	3*	4*	N.P.
	----	-----	-----	-----	-----	-----	-----	-----	-----	-----	-----	-----	-----	-----	-----	-----	-----	-----	-----	-----	-----	----
	1	15.9	16.6	16.9	16.3	15.8	14.9	14.5	13.4	12.9	12.9	13.2	13.1	12.7	3.1	16.9	7.4	9.5	16.9	7.4	9.5	0
	2	14.2	15.0	15.6	15.8	15.7	14.8	14.1	13.5	13.2	13.1	13.0	13.0	12.8	1.8	15.8	10.3	5.5	15.8	10.1	5.7	0
	3	13.4	13.2	13.0	12.9	13.1	13.1	6.8	4.7	4.2	3.7	3.6	3.0	10.9	3.9	13.4	3.0	10.4	13.6	3.0	10.6	0
	4	7.0	7.7	8.5	8.3	7.8	6.8	5.8	5.2	4.8	4.4	4.2	3.5	4.8	1.9	8.5	2.0	6.5	8.5	2.0	6.5	0
	5	8.0	8.3	8.2	8.1	8.0	6.5	6.1	5.7	5.2	4.3	3.8	3.3	4.5	2.6	8.3	0.6	7.7	8.4	0.5	7.9	0
	6	9.5	11.1	12.4	12.1	11.5	9.9	8.9	8.1	7.7	6.9	6.5	6.4	6.0	3.8	12.4	0.9	11.5	12.4	0.9	11.5	0
	7	11.4	11.4	11.6	11.9	11.8	11.3	10.0	9.9	9.9	9.8	9.8	9.4	9.2	1.9	11.9	6.3	5.6	12.0	6.3	5.7	0
	8	12.0	12.7	14.2	14.0	13.6	12.9	12.6	12.4	11.8	11.6	11.5	11.4	11.1	1.7	14.2	8.8	5.4	14.3	8.7	5.6	0
	9	13.9	13.6	12.9	12.7	12.0	11.8	11.9	12.1	12.9	12.7	12.1	11.4	12.2	1.0	14.0	10.6	3.4	14.3	10.5	3.8	0
	10	6.1	6.6	6.2	5.1	4.8	4.9	4.5	3.9	3.7	3.3	2.7	2.4	6.7	3.0	12.0	2.4	9.6	12.1	2.4	9.7	0
	11	8.3	9.6	10.1	9.9	9.4	8.0	6.5	5.4	4.5	4.2	4.1	4.2	5.0	2.8	10.1	1.2	8.9	10.1	1.2	8.9	0
	12	3.6	3.5	2.8	3.0	3.6	3.0	3.2	3.4	3.2	2.6	2.3	2.3	3.1	0.7	4.6	1.9	2.7	4.6	1.9	2.7	0
	13	6.8	8.7	9.5	9.8	9.9	8.7	8.2	7.5	6.6	6.7	6.6	6.7	5.9	2.3	9.9	2.5	7.4	9.9	2.3	7.6	0
	14	9.5	9.6	9.6	9.5	9.4	9.3	9.2	8.4	7.6	6.9	6.7	6.5	7.4	1.7	9.6	4.5	5.1	9.8	4.4	5.4	0
	15	7.3	7.3	7.3	7.0	6.6	6.1	6.1	6.0	6.0	6.0	5.9	5.7	6.7	0.7	8.0	5.7	2.3	8.0	5.6	2.4	0
	16	6.8	6.0	5.8	5.3	5.0	5.0	4.9	5.1	5.0	4.6	4.4	4.4	5.6	0.8	7.0	4.4	2.6	7.0	4.4	2.6	0
	17	6.2	5.9	5.9	5.8	5.6	5.6	5.6	5.5	5.5	5.5	5.4	5.1	5.4	0.3	6.2	4.6	1.6	6.3	4.4	1.9	0
	18	6.2	6.4	6.4	6.3	6.2	5.9	5.7	5.6	5.5	5.7	5.5	5.6	5.4	0.6	6.4	4.3	2.1	6.4	4.3	2.1	0
	19	6.8	6.9	7.1	7.2	7.0	6.2	6.0	5.6	5.4	5.2	4.7	4.6	6.0	0.7	7.2	4.6	2.6	7.2	4.6	2.6	0
	20	6.2	7.2	7.2	7.2	6.8	6.3	5.9	5.8	5.7	5.2	4.9	4.7	5.6	0.9	7.2	4.3	2.9	7.7	4.2	3.5	0
	21	10.5	10.9	11.8	12.0	12.0	11.7	11.0	10.8	10.8	10.1	9.9	10.2	8.6	2.8	12.0	4.6	7.4	12.0	4.5	7.5	0
	22	14.2	14.1	13.6	13.3	13.1	12.8	12.6	12.3	12.1	11.8	11.7	12.0	11.8	1.4	14.2	10.0	4.2	14.5	9.9	4.6	0
	23	15.2	13.9	14.6	15.5	15.3	14.6	13.8	13.3	12.7	12.1	11.6	10.9	13.0	1.4	15.5	10.9	4.6	15.5	10.9	4.6	0
	24	7.9	8.4	8.1	8.5	8.3	8.1	6.0	5.5	5.2	4.9	4.8	4.3	6.3	1.9	11.3	3.8	7.5	11.5	3.8	7.7	0
	25	4.6	5.0	5.6	6.1	6.1	5.9	6.0	5.8	5.5	5.3	4.9	5.0	4.4	1.2	6.1	2.4	3.7	6.3	2.4	3.9	0
	26	5.0	5.0	5.3	5.3	5.2	4.0	3.9	3.0	2.4	2.0	1.9	1.5	3.3	1.2	5.3	1.5	3.8	5.4	1.5	3.9	0
	27	6.5	6.7	8.0	7.7	7.7	7.1	7.0	7.0	7.1	6.8	5.9	5.2	4.3	2.9	8.0	0.3	7.7	8.0	0.2	7.8	0
	28	7.4	7.8	7.8	7.9	8.3	7.7	7.1	7.1	6.8	7.3	8.8	8.6	6.3	1.6	8.8	4.2	4.6	8.8	4.2	4.6	0
	29	9.6	10.2	11.0	11.0	10.4	10.0	9.2	8.8	8.6	8.5	8.4	8.5	8.7	1.1	11.0	7.0	4.0	11.0	7.0	4.0	0
	====	=====	=====	=====	=====	=====	=====	=====	=====	=====	=====	=====	=====	=====	=====	=====	=====	=====	=====	=====	=====	====
	SRED	9.0	9.3	9.6	9.5	9.3	8.7	8.0	7.6	7.3	7.0	6.9	6.7	7.4	1.8	10.2	4.7	5.5	10.3	4.6	5.7
	----	-----	-----	-----	-----	-----	-----	-----	-----	-----	-----	-----	-----	-----	-----	-----	-----	-----	-----	-----	-----	----
	STD	3.4	3.3	3.5	3.5	3.4	3.4	3.2	3.2	3.2	3.3	3.3	3.4
	----	-----	-----	-----	-----	-----	-----	-----	-----	-----	-----	-----	-----	-----	-----	-----	-----	-----	-----	-----	-----	----
	MAKS	15.9	16.6	16.9	16.3	15.8	14.9	14.5	13.5	13.2	13.1	13.2	13.1
	----	-----	-----	-----	-----	-----	-----	-----	-----	-----	-----	-----	-----	-----	-----	-----	-----	-----	-----	-----	-----	----
	MIN	3.6	3.5	2.8	3.0	3.6	3.0	3.2	3.0	2.4	2.0	1.9	1.5
	----	-----	-----	-----	-----	-----	-----	-----	-----	-----	-----	-----	-----	-----	-----	-----	-----	-----	-----	-----	-----	----
	N.P.	0	0	0	0	0	0	0	0	0	0	0	0									0
	====	=====	=====	=====	=====	=====	=====	=====	=====	=====	=====	=====	=====	=====	=====	=====	=====	=====	=====	=====	=====	====
1* IZ SATNIH VRIJEDNOSTI 1-24, 2* IZ SATNIH EKSTREMA, 3* PO DIJAGRAMU, 4* IZ EKSTREMA PO DIJAGRAMU
N.P. - BROJ NEDOSTAJUCIH PODATAKA
DHMZ RH Sluzba za opcu meteorologiju POSTAJA ZAGREB GRIC (236)
ODJEL ZA OBRADU I KONTROLU PODATAKA I KLIMATSKE PODLOGE MJESEC OZUJAK 3
SATNE VRIJEDNOSTI TEMPERATURE ZRAKA (ST.C) ( LIST 1 ) GODINA 2016
SIRINA 45 49 N
IZVOR Termograf IZRADA BROJ VISINA m DULJINA 15 59 E
VISINA 157 m
	----	-----	-----	-----	-----	-----	-----	-----	-----	-----	-----	-----	-----
	*SAT
	*	1	2	3	4	5	6	7	8	9	10	11	12
	DAN*
	----	-----	-----	-----	-----	-----	-----	-----	-----	-----	-----	-----	-----
	1	8.5	7.6	7.5	7.7	7.6	7.3	7.2	7.1	7.3	7.4	8.0	8.3
	2	7.0	6.2	5.8	5.7	5.6	5.6	5.4	6.2	6.8	6.7	6.9	8.0
	3	7.1	6.5	6.4	6.1	6.3	6.3	6.2	6.0	5.3	4.7	4.6	4.4
	4	3.0	2.8	1.9	1.7	1.7	1.9	2.1	2.6	3.1	3.9	4.9	5.8
	5	3.2	3.0	2.9	2.8	2.3	2.1	2.2	3.0	4.6	6.4	7.3	10.2
	6	10.0	8.8	8.7	8.8	8.6	7.6	6.8	7.3	8.1	9.6	11.2	12.1
	7	8.4	8.2	7.7	7.3	6.9	6.6	6.0	6.0	6.1	6.1	6.3	6.1
	8	3.8	3.8	3.9	4.1	4.1	4.2	4.1	4.5	4.9	5.8	6.2	7.2
	9	6.2	6.0	5.6	5.2	5.0	4.8	4.6	4.8	4.9	5.6	5.9	6.5
	10	6.4	6.5	6.6	6.5	6.5	6.6	6.2	7.0	8.4	9.9	10.9	11.9
	11	8.5	8.4	7.9	8.0	8.1	8.0	8.0	7.5	7.8	7.9	8.3	8.1
	12	7.3	7.0	7.1	7.2	7.3	7.3	7.2	7.2	6.9	6.8	7.4	7.9
	13	7.2	7.0	6.6	6.4	6.1	6.0	5.6	5.7	6.2	6.9	7.2	7.6
	14	7.8	7.3	7.0	6.5	5.9	5.4	5.2	5.1	4.9	5.0	6.2	7.6
	15	5.1	3.4	3.0	2.6	2.3	1.5	1.8	3.0	4.0	5.3	6.2	6.6
	16	3.1	3.2	3.2	3.1	3.2	3.1	3.2	3.4	3.6	4.0	4.4	5.1
	17	6.9	6.6	5.6	4.8	4.0	3.1	2.8	3.6	6.1	7.8	8.8	9.7
	18	4.8	4.1	3.8	3.1	2.8	2.5	2.4	3.3	4.8	6.8	9.8	11.7
	19	7.1	6.7	5.7	5.2	4.9	4.4	4.4	5.0	6.3	7.9	10.9	13.4
	20	8.5	8.3	7.6	6.0	5.2	5.4	4.7	5.5	7.6	8.5	10.2	12.5
	21	10.1	10.0	9.9	9.6	9.4	8.9	9.0	9.3	9.4	9.8	9.4	9.2
	22	7.6	7.6	7.5	7.5	7.1	7.2	7.2	6.6	6.9	7.5	8.5	9.7
	23	6.7	6.8	6.6	7.2	7.6	7.2	7.0	7.0	6.3	5.9	5.8	5.6
	24	6.9	7.1	7.0	7.0	6.5	5.8	7.0	7.4	8.2	9.0	9.3	10.3
	25	5.2	4.9	3.9	3.9	3.7	3.2	3.3	4.9	6.4	9.1	9.9	10.5
	26	9.8	9.6	9.5	9.1	9.0	9.0	9.1	10.9	11.1	11.1	11.2	12.1
	27	7.8	7.8	8.0	8.0	7.7	7.2	7.2	7.2	8.8	10.6	11.5	13.5
	28	10.5	9.5	8.6	8.3	8.3	8.3	8.5	8.9	9.6	9.8	10.8	11.8
	29	10.6	10.4	10.2	9.9	9.8	10.2	10.8	12.4	13.9	15.8	16.2	16.4
	30	11.4	11.3	11.2	11.3	10.7	10.3	11.1	12.8	13.6	15.1	16.9	17.4
	31	14.8	14.6	14.3	14.2	13.9	13.9	14.0	15.8	16.7	17.9	19.0	19.8
	====	=====	=====	=====	=====	=====	=====	=====	=====	=====	=====	=====	=====
	SRED	7.5	7.1	6.8	6.6	6.4	6.2	6.1	6.7	7.4	8.2	9.0	9.9
	----	-----	-----	-----	-----	-----	-----	-----	-----	-----	-----	-----	-----
	STD	2.6	2.6	2.6	2.7	2.7	2.7	2.8	3.0	3.0	3.2	3.4	3.6
	----	-----	-----	-----	-----	-----	-----	-----	-----	-----	-----	-----	-----
	MAKS	14.8	14.6	14.3	14.2	13.9	13.9	14.0	15.8	16.7	17.9	19.0	19.8
	----	-----	-----	-----	-----	-----	-----	-----	-----	-----	-----	-----	-----
	MIN	3.0	2.8	1.9	1.7	1.7	1.5	1.8	2.6	3.1	3.9	4.4	4.4
	----	-----	-----	-----	-----	-----	-----	-----	-----	-----	-----	-----	-----
	N.P.	0	0	0	0	0	0	0	0	0	0	0	0
	====	=====	=====	=====	=====	=====	=====	=====	=====	=====	=====	=====	=====
DHMZ RH Sluzba za opcu meteorologiju POSTAJA ZAGREB GRIC (236)
ODJEL ZA OBRADU I KONTROLU PODATAKA I KLIMATSKE PODLOGE MJESEC OZUJAK 3
SATNE VRIJEDNOSTI TEMPERATURE ZRAKA (ST.C) ( LIST 2 ) GODINA 2016
SIRINA 45 49 N
IZVOR Termograf IZRADA BROJ VISINA m DULJINA 15 59 E
VISINA 157 m
	----	-----	-----	-----	-----	-----	-----	-----	-----	-----	-----	-----	-----	-----	-----	-----	-----	-----	-----	-----	-----	----
	*SAT
	*	13	14	15	16	17	18	19	20	21	22	23	24	SRED-	STAN.	MAKS.	MIN.	AMPL.	MAKS.	MIN.	AMPL.	BR.
	DAN*													NJAK	DEV.	1*	1*	2*	3*	3*	4*	N.P.
	----	-----	-----	-----	-----	-----	-----	-----	-----	-----	-----	-----	-----	-----	-----	-----	-----	-----	-----	-----	-----	----
	1	8.0	8.0	8.5	8.9	8.8	8.1	8.1	7.9	7.6	7.5	7.5	7.1	7.8	0.5	8.9	7.1	1.8	9.1	7.1	2.0	0
	2	9.9	10.6	11.7	11.8	12.0	11.1	10.0	9.5	9.0	8.7	8.0	7.2	8.1	2.2	12.0	5.4	6.6	12.0	5.4	6.6	0
	3	4.5	4.3	4.0	4.0	4.0	4.2	4.6	4.5	4.5	4.0	3.6	3.2	5.0	1.1	7.1	3.2	3.9	7.2	3.2	4.0	0
	4	5.9	6.6	6.9	7.0	7.0	6.5	6.0	5.2	4.8	4.3	4.2	3.8	4.3	1.8	7.0	1.7	5.3	7.0	1.5	5.5	0
	5	11.4	11.7	13.7	13.9	13.4	12.0	11.2	10.8	10.8	10.7	10.4	10.2	7.9	4.2	13.9	2.1	11.8	13.9	2.1	11.8	0
	6	12.9	13.9	12.0	12.2	12.3	11.7	9.9	9.2	9.4	9.0	8.8	8.4	9.9	1.9	13.9	6.8	7.1	13.9	6.8	7.1	0
	7	6.1	6.4	6.3	6.2	6.0	5.8	5.2	5.0	4.6	4.1	4.1	3.9	6.1	1.2	8.4	3.9	4.5	8.4	3.9	4.5	0
	8	8.1	8.2	9.1	9.1	9.2	8.6	8.2	7.7	7.4	7.3	7.0	6.7	6.4	1.9	9.2	3.8	5.4	9.2	3.7	5.5	0
	9	6.7	7.1	7.5	7.7	7.8	7.7	7.2	6.7	6.2	5.7	5.7	5.9	6.1	1.0	7.8	4.6	3.2	7.8	4.5	3.3	0
	10	13.2	13.0	12.9	12.9	13.0	12.5	11.9	11.4	10.8	10.2	9.7	9.1	9.7	2.6	13.2	6.2	7.0	13.2	5.9	7.3	0
	11	8.5	8.4	8.2	8.0	7.9	7.8	7.7	7.7	7.8	7.4	6.9	7.2	7.9	0.4	8.5	6.9	1.6	9.1	6.9	2.2	0
	12	8.2	9.0	8.6	8.3	8.4	8.3	8.2	7.9	7.9	7.7	7.6	7.7	7.7	0.6	9.0	6.8	2.2	9.1	6.7	2.4	0
	13	8.2	8.0	7.9	7.8	8.0	8.0	8.0	8.0	7.9	7.9	7.8	7.9	7.2	0.8	8.2	5.6	2.6	8.3	5.6	2.7	0
	14	8.7	10.1	10.2	10.3	10.0	9.3	8.3	7.5	6.6	6.5	6.6	6.5	7.3	1.7	10.3	4.9	5.4	10.4	4.8	5.6	0
	15	6.4	6.4	6.2	5.0	4.5	3.9	3.8	3.7	3.6	3.0	2.9	3.0	4.0	1.5	6.6	1.5	5.1	6.6	1.5	5.1	0
	16	5.7	5.7	6.1	6.9	7.1	7.1	7.1	6.8	7.2	7.1	7.0	6.9	5.1	1.7	7.2	3.1	4.1	7.2	3.0	4.2	0
	17	11.3	11.6	12.0	12.1	11.6	10.5	9.5	8.5	8.0	7.2	6.1	5.1	7.6	2.9	12.1	2.8	9.3	12.2	2.8	9.4	0
	18	12.8	14.0	15.0	15.1	14.9	14.0	12.5	11.4	10.7	10.1	8.7	8.2	8.6	4.5	15.1	2.4	12.7	15.3	2.3	13.0	0
	19	14.3	15.1	15.7	15.8	15.4	14.6	12.7	12.0	11.6	11.5	9.5	8.8	10.0	4.0	15.8	4.4	11.4	15.9	4.3	11.6	0
	20	14.2	15.2	16.4	16.7	16.6	16.7	14.8	13.7	12.9	12.0	11.5	10.5	10.9	4.0	16.7	4.7	12.0	16.8	4.7	12.1	0
	21	9.2	9.4	9.3	9.2	9.1	9.0	8.5	8.1	8.0	8.0	7.9	7.7	9.1	0.7	10.1	7.7	2.4	10.5	7.7	2.8	0
	22	11.0	12.1	12.4	12.2	11.6	10.6	9.6	9.3	8.6	7.6	7.1	6.6	8.7	1.9	12.4	6.6	5.8	12.7	6.6	6.1	0
	23	5.4	5.3	5.2	5.0	5.4	5.6	5.4	5.5	5.6	5.4	5.0	5.0	6.0	0.8	7.6	5.0	2.6	7.7	5.0	2.7	0
	24	10.5	10.6	9.2	8.6	9.9	10.2	9.0	8.3	8.0	8.0	6.7	6.2	8.2	1.4	10.6	5.8	4.8	10.6	5.0	5.6	0
	25	11.7	13.4	13.8	13.8	13.1	12.8	11.8	11.0	10.6	10.3	10.1	9.8	8.8	3.7	13.8	3.2	10.6	13.9	3.2	10.7	0
	26	11.6	11.4	13.2	11.5	11.5	11.1	9.6	9.0	8.6	8.1	8.1	7.9	10.1	1.4	13.2	7.9	5.3	13.4	7.9	5.5	0
	27	14.5	15.0	15.7	15.8	15.7	14.3	13.6	13.1	12.9	12.6	12.1	11.5	11.3	3.1	15.8	7.2	8.6	15.9	7.1	8.8	0
	28	13.9	13.9	14.3	14.1	13.0	12.7	12.5	12.2	12.2	11.7	11.3	11.0	11.1	2.0	14.3	8.3	6.0	14.7	8.2	6.5	0
	29	16.4	16.7	17.8	17.6	17.0	16.7	15.7	14.8	13.7	12.8	12.2	11.8	13.7	2.8	17.8	9.8	8.0	17.8	9.8	8.0	0
	30	17.7	17.3	17.2	17.6	17.3	16.7	15.5	14.8	14.6	14.2	14.5	14.5	14.4	2.5	17.7	10.3	7.4	18.1	10.3	7.8	0
	31	19.8	19.8	19.8	19.7	19.5	18.6	17.7	17.6	17.6	16.6	16.3	15.6	17.0	2.2	19.8	13.9	5.9	20.4	13.8	6.6	0
	====	=====	=====	=====	=====	=====	=====	=====	=====	=====	=====	=====	=====	=====	=====	=====	=====	=====	=====	=====	=====	====
	SRED	10.5	10.9	11.2	11.1	11.0	10.5	9.8	9.3	9.0	8.6	8.2	7.9	8.6	2.0	11.7	5.6	6.1	11.9	5.5	6.4
	----	-----	-----	-----	-----	-----	-----	-----	-----	-----	-----	-----	-----	-----	-----	-----	-----	-----	-----	-----	-----	----
	STD	3.8	3.9	4.1	4.1	4.0	3.8	3.4	3.2	3.2	3.1	3.0	2.9
	----	-----	-----	-----	-----	-----	-----	-----	-----	-----	-----	-----	-----	-----	-----	-----	-----	-----	-----	-----	-----	----
	MAKS	19.8	19.8	19.8	19.7	19.5	18.6	17.7	17.6	17.6	16.6	16.3	15.6
	----	-----	-----	-----	-----	-----	-----	-----	-----	-----	-----	-----	-----	-----	-----	-----	-----	-----	-----	-----	-----	----
	MIN	4.5	4.3	4.0	4.0	4.0	3.9	3.8	3.7	3.6	3.0	2.9	3.0
	----	-----	-----	-----	-----	-----	-----	-----	-----	-----	-----	-----	-----	-----	-----	-----	-----	-----	-----	-----	-----	----
	N.P.	0	0	0	0	0	0	0	0	0	0	0	0									0
	====	=====	=====	=====	=====	=====	=====	=====	=====	=====	=====	=====	=====	=====	=====	=====	=====	=====	=====	=====	=====	====
1* IZ SATNIH VRIJEDNOSTI 1-24, 2* IZ SATNIH EKSTREMA, 3* PO DIJAGRAMU, 4* IZ EKSTREMA PO DIJAGRAMU
N.P. - BROJ NEDOSTAJUCIH PODATAKA
DHMZ RH Sluzba za opcu meteorologiju POSTAJA ZAGREB GRIC (236)
ODJEL ZA OBRADU I KONTROLU PODATAKA I KLIMATSKE PODLOGE MJESEC TRAVANJ 4
SATNE VRIJEDNOSTI TEMPERATURE ZRAKA (ST.C) ( LIST 1 ) GODINA 2016
SIRINA 45 49 N
IZVOR Termograf IZRADA BROJ VISINA m DULJINA 15 59 E
VISINA 157 m
	----	-----	-----	-----	-----	-----	-----	-----	-----	-----	-----	-----	-----
	*SAT
	*	1	2	3	4	5	6	7	8	9	10	11	12
	DAN*
	----	-----	-----	-----	-----	-----	-----	-----	-----	-----	-----	-----	-----
	1	15.1	14.8	15.3	15.6	15.2	15.1	15.2	15.7	15.9	17.1	18.9	20.9
	2	10.9	10.6	10.1	10.5	10.4	9.8	10.0	10.2	10.7	11.0	11.6	12.7
	3	9.7	9.0	9.0	8.8	8.1	7.9	8.2	10.2	12.2	13.1	15.8	17.6
	4	13.7	13.1	12.7	11.6	11.1	11.7	11.9	12.8	15.8	18.5	21.0	21.7
	5	17.6	16.3	15.7	15.0	14.4	14.1	14.7	15.9	17.3	18.2	20.4	22.7
	6	16.5	15.6	15.2	14.8	14.3	13.9	13.8	15.1	17.1	19.1	21.2	22.9
	7	17.3	16.8	16.6	14.9	13.8	13.2	13.6	15.6	17.2	18.2	19.6	20.7
	8	15.9	15.2	14.8	14.3	13.9	13.6	14.2	13.5	12.7	12.4	12.3	12.7
	9	10.2	10.0	9.9	9.8	9.7	9.6	9.6	9.5	10.1	11.2	11.5	10.8
	10	10.2	10.0	9.9	9.8	9.7	9.3	9.6	9.4	9.4	9.8	10.0	11.4
	11	11.2	11.0	10.9	11.0	10.7	10.1	9.9	11.1	11.7	12.0	14.6	16.4
	12	12.3	12.2	12.0	11.8	11.3	11.2	11.4	13.9	16.3	18.9	20.1	21.6
	13	14.4	14.7	14.6	14.0	14.6	14.8	14.9	16.7	17.8	19.0	19.5	21.0
	14	16.3	15.8	15.3	14.7	14.4	13.9	13.8	14.4	15.3	14.7	11.4	12.0
	15	8.9	8.5	7.7	7.5	7.3	6.8	7.6	9.7	11.6	13.7	16.7	17.9
	16	14.9	15.0	15.2	14.8	14.0	13.8	14.8	15.2	17.1	18.8	20.1	21.1
	17	14.4	13.3	12.7	12.5	12.2	12.3	14.0	15.8	18.0	20.9	22.8	22.2
	18	17.1	15.9	15.4	15.2	14.5	14.3	14.3	15.2	14.7	16.0	17.3	17.6
	19	13.1	12.8	12.4	11.8	11.3	11.0	10.4	10.2	10.2	10.6	11.2	11.6
	20	7.3	6.8	6.3	6.1	5.6	5.5	6.5	7.3	9.3	11.7	13.0	14.2
	21	8.9	8.2	7.7	7.3	7.1	7.0	7.6	9.1	11.0	12.9	14.9	16.7
	22	12.1	10.9	10.1	9.3	8.4	8.1	9.5	11.4	14.1	17.1	18.2	19.9
	23	13.2	12.2	11.2	10.7	10.2	10.2	11.8	13.4	14.9	16.7	18.4	17.8
	24	12.6	12.6	12.5	11.9	11.7	10.8	8.8	7.5	7.6	7.9	8.4	8.7
	25	6.1	6.0	5.9	5.8	5.7	5.9	6.7	7.3	7.6	8.4	9.8	10.0
	26	4.8	3.6	3.9	3.9	2.9	2.8	4.8	6.7	8.4	10.8	11.8	14.0
	27	11.0	10.6	10.3	10.0	9.9	9.8	11.0	11.0	10.9	12.6	12.7	12.4
	28	3.1	3.0	3.0	2.9	3.0	3.2	3.2	4.7	5.2	5.7	6.0	6.3
	29	5.6	5.6	5.7	5.8	5.8	6.1	6.6	6.9	7.6	8.5	10.3	12.3
	30	7.3	6.2	6.1	5.7	5.0	5.1	6.5	7.8	9.6	10.5	13.1	14.1
	====	=====	=====	=====	=====	=====	=====	=====	=====	=====	=====	=====	=====
	SRED	11.7	11.2	10.9	10.6	10.2	10.0	10.5	11.4	12.6	13.9	15.1	16.1
	----	-----	-----	-----	-----	-----	-----	-----	-----	-----	-----	-----	-----
	STD	3.9	3.8	3.8	3.6	3.6	3.5	3.3	3.4	3.6	4.0	4.4	4.6
	----	-----	-----	-----	-----	-----	-----	-----	-----	-----	-----	-----	-----
	MAKS	17.6	16.8	16.6	15.6	15.2	15.1	15.2	16.7	18.0	20.9	22.8	22.9
	----	-----	-----	-----	-----	-----	-----	-----	-----	-----	-----	-----	-----
	MIN	3.1	3.0	3.0	2.9	2.9	2.8	3.2	4.7	5.2	5.7	6.0	6.3
	----	-----	-----	-----	-----	-----	-----	-----	-----	-----	-----	-----	-----
	N.P.	0	0	0	0	0	0	0	0	0	0	0	0
	====	=====	=====	=====	=====	=====	=====	=====	=====	=====	=====	=====	=====
DHMZ RH Sluzba za opcu meteorologiju POSTAJA ZAGREB GRIC (236)
ODJEL ZA OBRADU I KONTROLU PODATAKA I KLIMATSKE PODLOGE MJESEC TRAVANJ 4
SATNE VRIJEDNOSTI TEMPERATURE ZRAKA (ST.C) ( LIST 2 ) GODINA 2016
SIRINA 45 49 N
IZVOR Termograf IZRADA BROJ VISINA m DULJINA 15 59 E
VISINA 157 m
	----	-----	-----	-----	-----	-----	-----	-----	-----	-----	-----	-----	-----	-----	-----	-----	-----	-----	-----	-----	-----	----
	*SAT
	*	13	14	15	16	17	18	19	20	21	22	23	24	SRED-	STAN.	MAKS.	MIN.	AMPL.	MAKS.	MIN.	AMPL.	BR.
	DAN*													NJAK	DEV.	1*	1*	2*	3*	3*	4*	N.P.
	----	-----	-----	-----	-----	-----	-----	-----	-----	-----	-----	-----	-----	-----	-----	-----	-----	-----	-----	-----	-----	----
	1	22.5	23.6	23.7	22.5	21.7	20.4	19.8	19.6	15.6	12.5	11.9	11.5	17.5	3.6	23.7	11.5	12.2	23.7	11.5	12.2	0
	2	13.5	14.9	15.7	15.8	15.6	14.8	13.5	12.6	11.6	11.2	10.6	10.0	12.0	2.0	15.8	9.8	6.0	16.0	9.7	6.3	0
	3	18.9	20.2	21.5	22.3	21.9	20.6	19.6	18.5	17.8	15.5	15.1	14.7	14.8	4.9	22.3	7.9	14.4	22.4	7.9	14.5	0
	4	23.4	22.6	22.6	23.6	23.4	22.5	20.6	19.6	18.6	18.0	17.2	17.4	17.7	4.3	23.6	11.1	12.5	23.6	11.1	12.5	0
	5	23.7	25.2	25.2	25.2	25.4	23.8	22.5	20.7	19.5	18.8	19.0	17.8	19.5	3.8	25.4	14.1	11.3	25.7	14.0	11.7	0
	6	24.7	25.0	25.8	25.9	25.7	24.4	22.2	20.4	19.2	18.2	17.8	17.5	19.4	4.1	25.9	13.8	12.1	26.0	13.8	12.2	0
	7	22.0	23.4	23.7	23.6	23.5	22.8	21.7	19.7	19.4	19.3	19.2	17.2	18.9	3.3	23.7	13.2	10.5	23.9	13.1	10.8	0
	8	13.0	13.3	12.9	12.6	12.5	12.3	11.6	11.1	10.9	10.8	10.8	10.3	12.8	1.4	15.9	10.3	5.6	17.2	10.3	6.9	0
	9	11.7	12.2	11.8	11.8	11.7	11.1	10.8	11.0	11.2	11.2	10.8	10.4	10.7	0.8	12.2	9.5	2.7	12.2	9.5	2.7	0
	10	12.7	13.4	13.4	14.5	14.4	14.3	13.5	11.8	11.3	10.8	11.5	11.1	11.3	1.7	14.5	9.3	5.2	14.6	9.3	5.3	0
	11	17.6	19.1	19.5	20.1	19.8	19.3	18.3	16.5	16.2	14.3	13.6	12.7	14.5	3.5	20.1	9.9	10.2	20.1	9.9	10.2	0
	12	22.1	22.7	23.0	22.7	22.1	20.5	18.8	17.5	16.7	15.4	14.9	14.5	16.8	4.2	23.0	11.2	11.8	23.0	11.2	11.8	0
	13	21.8	21.9	22.8	22.6	22.4	21.5	20.5	19.4	18.6	18.6	18.4	17.1	18.4	2.9	22.8	14.0	8.8	23.0	14.0	9.0	0
	14	12.1	13.0	13.6	13.5	13.0	13.1	12.7	11.1	10.7	9.9	9.5	9.5	13.1	1.9	16.3	9.5	6.8	17.1	9.4	7.7	0
	15	19.7	20.9	21.8	21.4	20.6	19.6	17.6	16.5	15.4	14.8	15.4	15.3	14.3	5.1	21.8	6.8	15.0	21.8	6.8	15.0	0
	16	22.1	22.8	22.7	22.6	22.4	21.6	19.7	18.7	18.0	17.5	16.7	14.9	18.1	3.1	22.8	13.8	9.0	22.9	13.8	9.1	0
	17	23.0	23.2	23.9	23.8	23.2	21.8	21.4	20.5	19.8	18.8	18.1	17.9	18.6	4.1	23.9	12.2	11.7	24.0	12.2	11.8	0
	18	17.8	17.7	17.9	17.9	18.0	17.4	16.0	15.3	14.4	13.9	13.8	13.5	15.9	1.5	18.0	13.5	4.5	18.1	13.5	4.6	0
	19	11.6	11.2	10.9	10.6	10.3	10.4	9.3	9.2	8.7	8.5	7.9	7.6	10.5	1.4	13.1	7.6	5.5	13.5	7.6	5.9	0
	20	14.2	14.8	15.0	15.5	15.7	15.5	13.6	12.3	11.6	10.6	9.6	8.9	10.7	3.6	15.7	5.5	10.2	16.0	5.5	10.5	0
	21	18.2	18.6	19.5	19.4	19.0	18.2	17.0	15.6	15.3	15.0	14.2	14.1	13.4	4.4	19.5	7.0	12.5	19.5	7.0	12.5	0
	22	20.9	21.7	22.0	22.0	22.1	21.5	19.9	18.2	16.6	16.8	16.4	15.2	15.9	4.8	22.1	8.1	14.0	22.4	8.1	14.3	0
	23	18.0	17.5	17.9	17.4	16.6	16.1	15.4	14.6	14.0	13.7	13.5	13.2	14.5	2.6	18.4	10.2	8.2	18.5	10.2	8.3	0
	24	9.1	9.8	10.0	10.0	9.8	9.8	9.0	8.5	7.6	6.8	6.6	6.4	9.4	1.9	12.6	6.4	6.2	13.2	6.4	6.8	0
	25	10.8	10.8	11.1	11.7	11.5	10.7	9.8	8.3	7.7	7.1	6.7	5.3	8.2	2.1	11.7	5.3	6.4	12.7	5.3	7.4	0
	26	15.0	16.2	15.7	15.2	15.0	14.8	14.0	13.6	12.6	12.3	11.7	11.1	10.2	4.7	16.2	2.8	13.4	16.7	2.6	14.1	0
	27	13.3	9.7	5.9	5.3	4.4	4.5	4.3	4.2	4.3	3.8	3.0	3.0	8.2	3.5	13.3	3.0	10.3	13.3	3.0	10.3	0
	28	6.8	7.6	7.7	7.2	6.8	6.7	5.8	6.2	6.2	5.9	5.9	5.9	5.3	1.6	7.7	2.9	4.8	7.8	2.9	4.9	0
	29	13.0	13.3	14.3	14.3	13.9	13.3	12.4	10.9	10.0	8.8	8.3	7.8	9.5	3.1	14.3	5.6	8.7	14.3	5.6	8.7	0
	30	14.4	13.7	13.9	13.5	13.7	13.5	12.8	12.6	11.6	11.1	10.7	11.1	10.4	3.2	14.4	5.0	9.4	14.4	5.0	9.4	0
	====	=====	=====	=====	=====	=====	=====	=====	=====	=====	=====	=====	=====	=====	=====	=====	=====	=====	=====	=====	=====	====
	SRED	16.9	17.3	17.5	17.5	17.2	16.6	15.5	14.5	13.7	13.0	12.6	12.1	13.7	3.1	18.4	9.0	9.3	18.6	9.0	9.6
	----	-----	-----	-----	-----	-----	-----	-----	-----	-----	-----	-----	-----	-----	-----	-----	-----	-----	-----	-----	-----	----
	STD	4.9	5.1	5.5	5.6	5.6	5.2	4.9	4.6	4.3	4.2	4.2	4.0
	----	-----	-----	-----	-----	-----	-----	-----	-----	-----	-----	-----	-----	-----	-----	-----	-----	-----	-----	-----	-----	----
	MAKS	24.7	25.2	25.8	25.9	25.7	24.4	22.5	20.7	19.8	19.3	19.2	17.9
	----	-----	-----	-----	-----	-----	-----	-----	-----	-----	-----	-----	-----	-----	-----	-----	-----	-----	-----	-----	-----	----
	MIN	6.8	7.6	5.9	5.3	4.4	4.5	4.3	4.2	4.3	3.8	3.0	3.0
	----	-----	-----	-----	-----	-----	-----	-----	-----	-----	-----	-----	-----	-----	-----	-----	-----	-----	-----	-----	-----	----
	N.P.	0	0	0	0	0	0	0	0	0	0	0	0									0
	====	=====	=====	=====	=====	=====	=====	=====	=====	=====	=====	=====	=====	=====	=====	=====	=====	=====	=====	=====	=====	====
1* IZ SATNIH VRIJEDNOSTI 1-24, 2* IZ SATNIH EKSTREMA, 3* PO DIJAGRAMU, 4* IZ EKSTREMA PO DIJAGRAMU
N.P. - BROJ NEDOSTAJUCIH PODATAKA
DHMZ RH Sluzba za opcu meteorologiju POSTAJA ZAGREB GRIC (236)
ODJEL ZA OBRADU I KONTROLU PODATAKA I KLIMATSKE PODLOGE MJESEC SVIBANJ 5
SATNE VRIJEDNOSTI TEMPERATURE ZRAKA (ST.C) ( LIST 1 ) GODINA 2016
SIRINA 45 49 N
IZVOR Termograf IZRADA BROJ VISINA m DULJINA 15 59 E
VISINA 157 m
	----	-----	-----	-----	-----	-----	-----	-----	-----	-----	-----	-----	-----
	*SAT
	*	1	2	3	4	5	6	7	8	9	10	11	12
	DAN*
	----	-----	-----	-----	-----	-----	-----	-----	-----	-----	-----	-----	-----
	1	11.2	11.6	11.5	11.5	11.4	11.0	11.2	11.6	11.3	11.6	12.3	12.4
	2	11.8	11.7	11.8	11.9	12.0	12.2	12.3	12.5	12.3	12.1	13.1	12.9
	3	13.5	13.7	13.9	13.0	12.1	11.8	13.7	14.2	16.0	16.1	16.6	17.3
	4	12.9	12.8	12.4	12.6	11.8	11.8	12.2	13.0	13.6	14.0	14.2	13.9
	5	12.7	12.4	11.8	11.1	10.5	10.3	10.7	11.4	12.8	14.0	15.7	16.5
	6	12.6	12.2	12.1	11.4	11.0	11.7	12.6	14.2	16.0	17.7	18.8	21.0
	7	12.7	11.9	11.7	11.2	11.2	11.4	12.2	13.7	15.7	17.6	19.6	21.1
	8	13.4	13.6	12.7	11.7	11.5	11.9	13.8	15.0	16.6	18.0	19.4	20.4
	9	12.3	12.2	11.9	11.6	11.0	11.4	12.9	14.3	16.0	18.0	19.6	20.9
	10	16.5	15.8	15.5	15.2	15.1	14.9	14.9	15.0	14.7	14.5	14.3	15.2
	11	14.7	14.5	14.2	13.8	13.8	13.6	13.8	14.8	15.5	15.4	15.5	15.9
	12	14.7	14.7	14.7	14.6	14.3	14.2	14.7	14.7	14.8	14.9	15.0	15.0
	13	13.1	12.9	12.1	11.9	11.8	12.9	14.3	15.9	16.7	17.2	17.9	17.8
	14	14.4	14.1	14.0	14.0	13.6	13.5	13.3	13.0	13.1	13.6	13.9	14.7
	15	12.7	12.8	12.7	12.6	12.1	11.9	11.9	10.1	9.3	8.7	8.7	9.8
	16	7.7	7.4	7.5	7.1	6.8	6.7	8.9	9.9	11.2	13.0	14.0	15.1
	17	9.6	9.5	8.6	8.1	7.8	8.1	9.4	11.2	13.1	15.0	15.8	16.6
	18	12.3	10.7	10.5	10.2	9.9	10.1	11.5	12.4	14.8	16.1	17.9	18.9
	19	12.6	12.4	12.4	11.8	11.6	12.3	13.1	14.9	14.7	14.5	16.7	18.3
	20	13.5	13.5	13.5	12.8	13.5	14.3	15.5	16.2	17.5	18.3	18.9	19.9
	21	14.0	13.4	12.9	12.7	12.5	12.6	14.2	16.5	19.7	20.8	21.8	22.8
	22	15.7	15.4	14.8	14.3	13.7	13.8	14.7	16.5	18.2	20.6	22.2	23.9
	23	17.0	16.0	15.4	15.2	15.2	15.5	17.6	18.4	20.7	21.8	22.7	24.3
	24	11.2	11.6	11.3	11.3	11.2	11.0	11.5	13.5	14.7	15.8	16.7	16.6
	25	15.4	16.0	15.6	15.4	15.3	15.6	16.6	17.6	19.3	20.4	22.3	24.0
	26	19.3	18.4	18.0	17.4	16.8	17.1	18.2	18.8	19.8	20.8	22.8	23.4
	27	19.3	18.1	17.6	16.6	15.4	16.6	17.7	19.7	20.9	22.8	24.3	25.8
	28	19.6	18.9	17.8	17.6	17.1	17.6	18.9	21.1	23.8	24.7	25.8	27.5
	29	22.0	20.8	20.1	20.2	19.7	19.4	19.5	20.7	22.7	24.8	25.7	27.6
	30	17.5	16.8	16.3	15.8	15.5	15.8	16.8	18.8	20.6	22.0	22.7	23.7
	31	17.4	16.7	16.0	15.3	14.9	15.1	16.8	18.5	19.9	21.6	22.9	23.5
	====	=====	=====	=====	=====	=====	=====	=====	=====	=====	=====	=====	=====
	SRED	14.3	14.0	13.6	13.2	12.9	13.1	14.0	15.1	16.3	17.3	18.3	19.2
	----	-----	-----	-----	-----	-----	-----	-----	-----	-----	-----	-----	-----
	STD	3.1	2.8	2.7	2.7	2.7	2.7	2.7	3.0	3.5	3.9	4.2	4.6
	----	-----	-----	-----	-----	-----	-----	-----	-----	-----	-----	-----	-----
	MAKS	22.0	20.8	20.1	20.2	19.7	19.4	19.5	21.1	23.8	24.8	25.8	27.6
	----	-----	-----	-----	-----	-----	-----	-----	-----	-----	-----	-----	-----
	MIN	7.7	7.4	7.5	7.1	6.8	6.7	8.9	9.9	9.3	8.7	8.7	9.8
	----	-----	-----	-----	-----	-----	-----	-----	-----	-----	-----	-----	-----
	N.P.	0	0	0	0	0	0	0	0	0	0	0	0
	====	=====	=====	=====	=====	=====	=====	=====	=====	=====	=====	=====	=====
DHMZ RH Sluzba za opcu meteorologiju POSTAJA ZAGREB GRIC (236)
ODJEL ZA OBRADU I KONTROLU PODATAKA I KLIMATSKE PODLOGE MJESEC SVIBANJ 5
SATNE VRIJEDNOSTI TEMPERATURE ZRAKA (ST.C) ( LIST 2 ) GODINA 2016
SIRINA 45 49 N
IZVOR Termograf IZRADA BROJ VISINA m DULJINA 15 59 E
VISINA 157 m
	----	-----	-----	-----	-----	-----	-----	-----	-----	-----	-----	-----	-----	-----	-----	-----	-----	-----	-----	-----	-----	----
	*SAT
	*	13	14	15	16	17	18	19	20	21	22	23	24	SRED-	STAN.	MAKS.	MIN.	AMPL.	MAKS.	MIN.	AMPL.	BR.
	DAN*													NJAK	DEV.	1*	1*	2*	3*	3*	4*	N.P.
	----	-----	-----	-----	-----	-----	-----	-----	-----	-----	-----	-----	-----	-----	-----	-----	-----	-----	-----	-----	-----	----
	1	12.9	12.9	13.1	13.4	13.3	13.0	12.3	11.9	11.7	11.7	11.7	11.8	12.0	0.7	13.4	11.0	2.4	13.4	11.0	2.4	0
	2	12.8	13.4	13.2	13.9	14.0	13.0	12.7	12.6	12.4	12.7	13.0	13.3	12.6	0.6	14.0	11.7	2.3	14.0	11.7	2.3	0
	3	17.8	17.1	16.9	14.1	13.5	13.8	14.0	13.6	13.2	11.9	12.3	12.7	14.3	1.8	17.8	11.8	6.0	17.8	11.7	6.1	0
	4	13.7	13.9	14.4	14.7	15.5	15.0	14.4	13.6	13.1	12.4	11.7	11.9	13.3	1.1	15.5	11.7	3.8	15.5	11.7	3.8	0
	5	17.6	18.5	18.7	19.2	19.1	18.6	18.0	16.9	16.4	15.6	14.6	13.7	14.9	3.0	19.2	10.3	8.9	19.3	10.3	9.0	0
	6	17.8	18.8	20.0	19.8	20.3	20.2	19.3	17.9	16.7	16.0	14.6	13.8	16.1	3.3	21.0	11.0	10.0	21.0	11.0	10.0	0
	7	22.6	21.8	21.6	21.7	21.4	20.3	18.2	17.3	15.9	15.8	14.6	13.8	16.5	3.9	22.6	11.2	11.4	22.6	11.0	11.6	0
	8	22.2	21.0	21.1	20.5	20.2	17.4	15.7	15.0	15.3	14.8	14.6	13.2	16.2	3.3	22.2	11.5	10.7	22.2	11.4	10.8	0
	9	21.8	23.0	23.8	21.8	21.8	20.5	19.8	18.7	18.2	17.5	17.3	16.8	17.2	4.0	23.8	11.0	12.8	23.8	11.0	12.8	0
	10	15.1	15.0	15.5	15.7	15.8	15.9	15.7	15.4	15.2	15.2	15.1	14.9	15.3	0.5	16.5	14.3	2.2	16.8	14.3	2.5	0
	11	16.0	15.8	15.3	15.4	15.5	15.5	15.5	15.1	15.0	14.8	14.8	14.6	15.0	0.7	16.0	13.6	2.4	16.1	13.6	2.5	0
	12	15.1	15.3	15.4	15.5	15.9	15.9	15.8	15.2	14.8	14.3	14.2	13.9	14.9	0.5	15.9	13.9	2.0	16.0	13.8	2.2	0
	13	15.8	17.2	16.7	16.7	16.7	16.7	16.3	15.5	15.1	14.6	14.5	14.4	15.2	1.9	17.9	11.8	6.1	17.9	11.8	6.1	0
	14	16.6	18.1	19.1	19.6	19.0	14.8	14.1	13.6	13.3	13.1	13.0	12.7	14.7	2.1	19.6	12.7	6.9	19.6	12.6	7.0	0
	15	9.9	10.2	10.5	10.6	10.0	9.7	9.5	8.9	7.9	8.8	8.1	7.7	10.2	1.6	12.8	7.7	5.1	12.8	7.7	5.1	0
	16	14.4	15.2	16.6	16.6	15.9	15.1	14.5	12.6	11.4	10.5	10.3	9.6	11.6	3.3	16.6	6.7	9.9	17.0	6.7	10.3	0
	17	16.9	16.5	16.8	16.8	16.0	15.7	15.4	13.5	12.9	12.6	12.4	12.5	13.0	3.2	16.9	7.8	9.1	17.6	7.7	9.9	0
	18	20.2	20.4	20.2	20.0	20.3	19.6	18.5	17.2	15.8	14.4	13.5	13.4	15.4	3.8	20.4	9.9	10.5	20.8	9.8	11.0	0
	19	17.7	18.4	20.2	19.6	18.8	16.5	15.3	14.4	14.2	14.3	14.2	14.0	15.1	2.5	20.2	11.6	8.6	20.3	11.4	8.9	0
	20	19.2	19.9	20.8	21.2	20.7	18.2	16.8	16.6	16.9	16.3	16.3	14.8	16.9	2.6	21.2	12.8	8.4	21.4	12.6	8.8	0
	21	23.5	24.0	23.7	23.8	23.3	23.1	22.3	21.0	18.7	18.4	17.5	16.4	18.7	4.2	24.0	12.5	11.5	24.1	12.4	11.7	0
	22	24.9	25.6	26.1	25.8	25.7	24.7	23.8	22.7	21.2	20.7	20.5	19.8	20.2	4.3	26.1	13.7	12.4	26.2	13.5	12.7	0
	23	24.5	25.2	26.0	25.1	17.5	19.6	19.4	18.7	18.4	14.4	12.3	11.7	18.9	4.1	26.0	11.7	14.3	26.0	11.7	14.3	0
	24	16.2	15.8	17.8	17.6	17.7	17.4	16.7	16.3	15.7	15.1	15.4	15.4	14.7	2.4	17.8	11.0	6.8	18.0	11.0	7.0	0
	25	24.4	25.1	24.6	25.3	25.2	24.3	23.2	21.7	20.4	18.8	19.1	19.0	20.2	3.6	25.3	15.3	10.0	25.5	15.3	10.2	0
	26	23.9	24.7	25.2	25.0	24.8	24.3	23.7	22.1	21.2	20.2	19.5	19.4	21.0	2.8	25.2	16.8	8.4	25.2	16.8	8.4	0
	27	27.3	28.0	28.3	28.4	28.3	27.2	26.9	25.3	24.1	23.2	22.3	20.7	22.7	4.2	28.4	15.4	13.0	28.4	15.3	13.1	0
	28	28.5	29.2	29.3	29.4	29.1	28.2	27.6	26.0	23.8	23.0	23.0	22.2	23.7	4.2	29.4	17.1	12.3	29.4	17.1	12.3	0
	29	28.6	29.0	30.0	29.7	28.6	25.8	21.8	18.0	18.2	18.0	17.8	17.6	22.8	4.2	30.0	17.6	12.4	30.0	17.6	12.4	0
	30	21.7	24.6	24.9	24.6	24.2	22.9	22.3	21.3	19.8	18.6	18.1	17.6	20.1	3.1	24.9	15.5	9.4	25.0	15.5	9.5	0
	31	24.5	24.8	25.4	24.6	24.3	23.3	22.5	21.3	19.8	18.8	18.7	18.4	20.2	3.4	25.4	14.9	10.5	25.4	14.8	10.6	0
	====	=====	=====	=====	=====	=====	=====	=====	=====	=====	=====	=====	=====	=====	=====	=====	=====	=====	=====	=====	=====	====
	SRED	19.5	19.9	20.4	20.2	19.8	18.9	18.1	17.1	16.3	15.7	15.3	14.9	16.6	2.7	20.8	12.4	8.4	20.9	12.4	8.6
	----	-----	-----	-----	-----	-----	-----	-----	-----	-----	-----	-----	-----	-----	-----	-----	-----	-----	-----	-----	-----	----
	STD	4.9	5.0	5.0	5.0	4.8	4.5	4.3	4.0	3.6	3.4	3.4	3.2
	----	-----	-----	-----	-----	-----	-----	-----	-----	-----	-----	-----	-----	-----	-----	-----	-----	-----	-----	-----	-----	----
	MAKS	28.6	29.2	30.0	29.7	29.1	28.2	27.6	26.0	24.1	23.2	23.0	22.2
	----	-----	-----	-----	-----	-----	-----	-----	-----	-----	-----	-----	-----	-----	-----	-----	-----	-----	-----	-----	-----	----
	MIN	9.9	10.2	10.5	10.6	10.0	9.7	9.5	8.9	7.9	8.8	8.1	7.7
	----	-----	-----	-----	-----	-----	-----	-----	-----	-----	-----	-----	-----	-----	-----	-----	-----	-----	-----	-----	-----	----
	N.P.	0	0	0	0	0	0	0	0	0	0	0	0									0
	====	=====	=====	=====	=====	=====	=====	=====	=====	=====	=====	=====	=====	=====	=====	=====	=====	=====	=====	=====	=====	====
1* IZ SATNIH VRIJEDNOSTI 1-24, 2* IZ SATNIH EKSTREMA, 3* PO DIJAGRAMU, 4* IZ EKSTREMA PO DIJAGRAMU
N.P. - BROJ NEDOSTAJUCIH PODATAKA
DHMZ RH Sluzba za opcu meteorologiju POSTAJA ZAGREB GRIC (236)
ODJEL ZA OBRADU I KONTROLU PODATAKA I KLIMATSKE PODLOGE MJESEC LIPANJ 6
SATNE VRIJEDNOSTI TEMPERATURE ZRAKA (ST.C) ( LIST 1 ) GODINA 2016
SIRINA 45 49 N
IZVOR Termograf IZRADA BROJ VISINA m DULJINA 15 59 E
VISINA 157 m
	----	-----	-----	-----	-----	-----	-----	-----	-----	-----	-----	-----	-----
	*SAT
	*	1	2	3	4	5	6	7	8	9	10	11	12
	DAN*
	----	-----	-----	-----	-----	-----	-----	-----	-----	-----	-----	-----	-----
	1	18.5	17.8	17.5	17.2	16.1	16.1	17.2	18.4	19.7	21.4	22.1	22.6
	2	18.0	17.6	17.2	16.9	16.6	16.3	16.9	18.6	20.1	21.1	22.2	20.9
	3	15.9	15.7	15.4	14.8	14.2	15.3	17.1	18.2	19.5	20.9	22.0	23.1
	4	17.8	17.6	17.5	17.3	17.4	17.8	18.8	19.8	20.5	22.1	23.3	24.3
	5	17.1	17.1	16.9	16.2	16.2	16.0	16.4	18.1	20.3	21.8	23.1	25.0
	6	17.6	16.9	16.7	16.4	16.0	16.3	17.8	19.8	20.9	21.5	21.6	22.4
	7	16.9	16.4	16.3	16.3	16.4	17.0	17.8	18.5	19.7	21.0	21.9	22.8
	8	17.9	17.6	16.1	15.3	15.2	15.1	18.0	19.2	20.1	21.2	22.7	22.9
	9	19.5	18.7	18.7	18.6	18.5	18.3	18.4	19.4	20.5	22.0	22.5	24.5
	10	19.4	19.3	18.8	18.6	18.3	17.4	17.0	16.9	17.3	17.4	18.4	19.8
	11	16.5	15.8	15.6	15.1	15.3	15.9	17.5	19.5	21.2	22.5	23.5	25.2
	12	16.7	16.5	16.5	15.8	15.7	15.7	16.0	16.6	17.5	18.6	18.4	18.6
	13	17.1	17.2	16.8	16.8	16.6	16.7	17.6	18.1	19.8	21.4	20.9	22.5
	14	17.9	17.8	17.0	16.8	16.5	16.9	17.7	19.0	20.7	22.1	22.7	22.3
	15	17.0	17.3	16.9	16.7	16.7	16.8	17.3	18.6	19.4	20.7	21.9	22.7
	16	18.1	17.8	17.6	17.1	17.1	17.3	18.8	20.8	22.4	23.6	25.4	26.6
	17	22.1	22.1	21.7	22.2	22.3	22.1	21.9	20.2	21.5	23.9	25.5	26.2
	18	18.6	17.7	17.2	16.9	16.8	16.7	18.3	20.2	21.8	23.5	24.9	25.8
	19	17.7	17.2	16.7	16.4	16.5	16.9	18.0	18.1	17.9	18.0	18.0	18.0
	20	16.0	16.2	15.2	14.9	15.5	15.0	15.4	16.8	16.8	18.8	19.9	20.1
	21	16.7	16.4	16.4	16.2	15.7	16.1	18.7	19.8	20.6	22.0	23.5	24.8
	22	20.4	19.6	19.5	19.0	18.8	19.1	20.8	22.2	24.9	25.6	26.3	27.4
	23	24.2	22.8	22.0	21.4	21.0	21.1	22.9	26.0	26.6	26.6	28.6	29.1
	24	25.4	24.4	24.7	23.7	23.7	23.6	25.2	27.7	28.8	29.7	30.7	31.5
	25	27.2	26.4	25.8	24.8	24.3	24.5	25.8	26.7	27.5	29.3	30.3	31.0
	26	22.5	22.6	21.4	20.7	20.5	21.3	21.6	23.0	24.2	24.7	26.0	26.5
	27	23.3	22.6	22.5	22.3	21.8	21.8	23.2	23.4	23.7	23.0	22.8	19.4
	28	17.0	16.9	16.7	16.6	16.5	16.7	18.6	20.0	21.3	23.3	23.8	24.7
	29	19.1	18.8	18.4	17.9	17.7	17.8	19.3	20.7	22.8	24.6	25.8	27.1
	30	22.5	22.0	20.7	19.8	19.7	19.8	21.4	22.9	24.6	26.2	27.3	28.4
	====	=====	=====	=====	=====	=====	=====	=====	=====	=====	=====	=====	=====
	SRED	19.2	18.8	18.3	18.0	17.8	17.9	19.0	20.2	21.4	22.6	23.5	24.2
	----	-----	-----	-----	-----	-----	-----	-----	-----	-----	-----	-----	-----
	STD	2.9	2.7	2.7	2.6	2.6	2.5	2.6	2.8	2.9	2.9	3.1	3.4
	----	-----	-----	-----	-----	-----	-----	-----	-----	-----	-----	-----	-----
	MAKS	27.2	26.4	25.8	24.8	24.3	24.5	25.8	27.7	28.8	29.7	30.7	31.5
	----	-----	-----	-----	-----	-----	-----	-----	-----	-----	-----	-----	-----
	MIN	15.9	15.7	15.2	14.8	14.2	15.0	15.4	16.6	16.8	17.4	18.0	18.0
	----	-----	-----	-----	-----	-----	-----	-----	-----	-----	-----	-----	-----
	N.P.	0	0	0	0	0	0	0	0	0	0	0	0
	====	=====	=====	=====	=====	=====	=====	=====	=====	=====	=====	=====	=====
DHMZ RH Sluzba za opcu meteorologiju POSTAJA ZAGREB GRIC (236)
ODJEL ZA OBRADU I KONTROLU PODATAKA I KLIMATSKE PODLOGE MJESEC LIPANJ 6
SATNE VRIJEDNOSTI TEMPERATURE ZRAKA (ST.C) ( LIST 2 ) GODINA 2016
SIRINA 45 49 N
IZVOR Termograf IZRADA BROJ VISINA m DULJINA 15 59 E
VISINA 157 m
	----	-----	-----	-----	-----	-----	-----	-----	-----	-----	-----	-----	-----	-----	-----	-----	-----	-----	-----	-----	-----	----
	*SAT
	*	13	14	15	16	17	18	19	20	21	22	23	24	SRED-	STAN.	MAKS.	MIN.	AMPL.	MAKS.	MIN.	AMPL.	BR.
	DAN*													NJAK	DEV.	1*	1*	2*	3*	3*	4*	N.P.
	----	-----	-----	-----	-----	-----	-----	-----	-----	-----	-----	-----	-----	-----	-----	-----	-----	-----	-----	-----	-----	----
	1	23.5	23.7	24.5	20.4	21.2	20.7	19.4	18.7	18.4	18.3	18.2	18.2	19.6	2.4	24.5	16.1	8.4	24.5	15.9	8.6	0
	2	21.2	21.8	21.7	23.3	22.7	22.0	19.3	19.0	18.0	17.4	17.2	16.3	19.3	2.2	23.3	16.3	7.0	23.6	16.3	7.3	0
	3	23.7	23.5	23.6	23.3	23.3	23.5	18.6	18.2	17.9	17.9	17.4	17.7	19.2	3.2	23.7	14.2	9.5	24.3	14.2	10.1	0
	4	25.5	25.8	26.0	25.7	26.2	25.7	23.6	17.7	18.2	18.4	17.4	17.3	20.9	3.5	26.2	17.3	8.9	26.3	17.0	9.3	0
	5	24.6	24.2	20.9	20.0	19.6	19.0	19.4	19.3	18.5	18.3	17.8	17.7	19.3	2.7	25.0	16.0	9.0	25.1	15.9	9.2	0
	6	22.8	23.7	25.7	25.5	24.7	18.7	18.5	18.0	17.8	17.8	17.4	17.1	19.6	3.0	25.7	16.0	9.7	25.7	15.8	9.9	0
	7	23.6	24.2	24.0	24.1	23.6	23.1	22.2	21.3	20.2	19.4	19.0	17.9	20.2	2.8	24.2	16.3	7.9	24.3	16.1	8.2	0
	8	24.0	24.5	24.6	24.7	24.3	23.3	22.6	21.8	21.2	20.7	19.8	19.6	20.5	3.1	24.7	15.1	9.6	24.9	15.1	9.8	0
	9	24.4	24.5	24.6	24.1	23.9	22.9	22.2	22.3	21.6	21.0	20.2	19.8	21.3	2.2	24.6	18.3	6.3	24.6	18.3	6.3	0
	10	20.0	20.4	21.3	21.5	21.8	21.7	21.3	20.6	19.4	18.4	18.2	17.0	19.2	1.6	21.8	16.9	4.9	22.1	16.9	5.2	0
	11	25.4	24.1	24.0	23.4	22.0	22.2	21.4	20.5	20.3	19.2	18.4	17.5	20.1	3.3	25.4	15.1	10.3	26.0	15.1	10.9	0
	12	19.0	19.1	20.2	19.8	19.7	19.4	18.8	18.4	18.0	17.7	17.6	17.2	17.8	1.4	20.2	15.7	4.5	20.2	15.6	4.6	0
	13	23.6	22.9	24.1	23.6	23.9	23.1	22.2	20.5	19.7	19.6	18.9	18.4	20.1	2.6	24.1	16.6	7.5	24.4	16.6	7.8	0
	14	23.3	21.4	20.5	21.6	20.4	20.2	20.1	19.3	18.5	18.0	17.6	17.3	19.4	2.1	23.3	16.5	6.8	23.4	16.3	7.1	0
	15	19.8	20.6	22.5	23.3	23.2	23.2	22.2	21.1	20.0	19.3	18.3	18.5	19.8	2.3	23.3	16.7	6.6	23.5	16.6	6.9	0
	16	28.0	27.6	28.4	28.6	28.5	28.0	27.4	26.5	25.6	24.6	22.7	22.4	23.4	4.2	28.6	17.1	11.5	28.6	17.0	11.6	0
	17	26.4	26.3	25.9	25.3	25.2	24.1	22.6	21.7	20.9	20.6	19.6	19.1	22.9	2.2	26.4	19.1	7.3	26.7	19.1	7.6	0
	18	26.6	27.0	26.8	26.8	26.4	25.9	24.0	23.1	22.2	18.8	18.2	17.8	21.8	3.8	27.0	16.7	10.3	27.1	16.6	10.5	0
	19	17.2	16.5	16.8	17.1	17.5	17.2	17.2	17.2	17.0	16.7	16.5	16.2	17.2	0.6	18.1	16.2	1.9	18.1	16.2	1.9	0
	20	20.4	20.2	21.7	22.0	21.7	21.4	21.4	20.4	18.8	17.6	17.7	16.8	18.4	2.4	22.0	14.9	7.1	22.1	14.9	7.2	0
	21	25.7	26.7	27.4	26.6	25.8	25.3	25.0	23.4	22.4	22.8	21.6	20.6	21.7	3.8	27.4	15.7	11.7	27.4	15.7	11.7	0
	22	27.0	28.1	27.8	27.6	27.5	27.1	26.3	25.6	25.4	25.0	24.9	24.3	24.2	3.2	28.1	18.8	9.3	28.1	18.8	9.3	0
	23	30.2	30.6	30.6	30.3	30.2	29.7	29.0	27.6	27.3	27.1	26.6	26.5	26.6	3.2	30.6	21.0	9.6	30.6	21.0	9.6	0
	24	32.4	32.5	32.3	32.5	32.3	31.5	31.1	29.2	29.2	28.6	28.0	27.6	28.6	3.1	32.5	23.6	8.9	32.5	23.6	8.9	0
	25	32.0	32.3	31.6	31.3	24.2	26.3	25.6	23.9	23.1	22.2	22.9	22.4	26.7	3.2	32.3	22.2	10.1	32.3	22.2	10.1	0
	26	27.8	27.5	28.0	27.9	28.0	27.5	27.3	26.2	25.1	24.7	24.5	24.1	24.7	2.5	28.0	20.5	7.5	28.0	20.5	7.5	0
	27	19.5	19.7	19.5	18.7	18.2	18.9	18.7	18.4	18.2	18.2	18.1	17.6	20.6	2.1	23.7	17.6	6.1	24.1	17.6	6.5	0
	28	25.3	25.3	25.5	25.6	25.8	25.8	25.4	23.8	21.8	21.6	21.2	20.6	21.7	3.4	25.8	16.5	9.3	25.9	16.4	9.5	0
	29	27.7	28.6	29.4	29.4	29.3	28.2	27.6	26.5	24.5	23.8	23.5	22.6	23.8	4.1	29.4	17.7	11.7	29.5	17.7	11.8	0
	30	28.4	29.2	28.8	29.0	28.3	27.4	27.2	25.8	24.4	24.1	24.0	22.8	24.8	3.2	29.2	19.7	9.5	29.2	19.7	9.5	0
	====	=====	=====	=====	=====	=====	=====	=====	=====	=====	=====	=====	=====	=====	=====	=====	=====	=====	=====	=====	=====	====
	SRED	24.6	24.7	25.0	24.8	24.3	23.8	22.9	21.9	21.1	20.6	20.1	19.6	21.4	2.8	25.6	17.3	8.3	25.8	17.3	8.5
	----	-----	-----	-----	-----	-----	-----	-----	-----	-----	-----	-----	-----	-----	-----	-----	-----	-----	-----	-----	-----	----
	STD	3.7	3.8	3.7	3.7	3.5	3.5	3.5	3.3	3.1	3.1	3.1	3.0
	----	-----	-----	-----	-----	-----	-----	-----	-----	-----	-----	-----	-----	-----	-----	-----	-----	-----	-----	-----	-----	----
	MAKS	32.4	32.5	32.3	32.5	32.3	31.5	31.1	29.2	29.2	28.6	28.0	27.6
	----	-----	-----	-----	-----	-----	-----	-----	-----	-----	-----	-----	-----	-----	-----	-----	-----	-----	-----	-----	-----	----
	MIN	17.2	16.5	16.8	17.1	17.5	17.2	17.2	17.2	17.0	16.7	16.5	16.2
	----	-----	-----	-----	-----	-----	-----	-----	-----	-----	-----	-----	-----	-----	-----	-----	-----	-----	-----	-----	-----	----
	N.P.	0	0	0	0	0	0	0	0	0	0	0	0									0
	====	=====	=====	=====	=====	=====	=====	=====	=====	=====	=====	=====	=====	=====	=====	=====	=====	=====	=====	=====	=====	====
1* IZ SATNIH VRIJEDNOSTI 1-24, 2* IZ SATNIH EKSTREMA, 3* PO DIJAGRAMU, 4* IZ EKSTREMA PO DIJAGRAMU
N.P. - BROJ NEDOSTAJUCIH PODATAKA
DHMZ RH Sluzba za opcu meteorologiju POSTAJA ZAGREB GRIC (236)
ODJEL ZA OBRADU I KONTROLU PODATAKA I KLIMATSKE PODLOGE MJESEC SRPANJ 7
SATNE VRIJEDNOSTI TEMPERATURE ZRAKA (ST.C) ( LIST 1 ) GODINA 2016
SIRINA 45 49 N
IZVOR Termograf IZRADA BROJ VISINA m DULJINA 15 59 E
VISINA 157 m
	----	-----	-----	-----	-----	-----	-----	-----	-----	-----	-----	-----	-----
	*SAT
	*	1	2	3	4	5	6	7	8	9	10	11	12
	DAN*
	----	-----	-----	-----	-----	-----	-----	-----	-----	-----	-----	-----	-----
	1	22.3	21.5	21.0	20.8	20.7	20.8	21.9	23.7	25.3	25.9	26.1	28.0
	2	23.1	22.7	21.9	21.8	21.7	21.9	23.2	24.8	26.0	27.5	28.7	29.4
	3	24.4	24.7	22.7	21.8	21.7	21.6	19.8	19.5	19.6	19.6	20.8	20.9
	4	18.6	17.9	17.7	17.1	17.3	17.8	18.8	20.1	21.7	22.9	23.4	24.6
	5	19.8	19.2	18.8	18.1	18.0	18.4	19.9	22.0	23.8	25.2	26.0	27.2
	6	22.8	22.3	22.2	21.4	21.2	21.3	21.4	19.8	19.8	20.4	21.3	22.7
	7	19.2	18.9	17.9	18.6	18.7	19.1	19.6	20.6	21.2	22.4	23.3	24.2
	8	20.7	20.3	20.3	19.6	19.4	19.6	20.5	21.9	23.0	24.8	25.7	27.3
	9	23.0	22.2	22.1	21.8	22.8	22.2	22.1	23.7	24.7	25.3	26.7	27.8
	10	22.8	22.5	21.8	21.7	21.2	21.8	23.0	24.0	25.5	27.4	27.9	29.4
	11	25.4	23.8	23.7	23.5	23.0	23.0	24.0	25.6	26.7	28.5	30.2	31.2
	12	25.9	25.0	23.8	23.0	22.7	23.0	24.0	25.9	27.5	29.2	30.7	32.1
	13	26.4	26.0	24.8	24.4	23.7	22.7	23.6	24.3	25.4	26.5	27.7	28.7
	14	21.2	19.6	19.0	19.1	19.0	18.8	19.0	19.8	19.9	21.1	21.0	22.3
	15	17.6	17.1	16.9	16.3	15.9	15.8	15.4	15.8	16.9	17.9	18.1	18.5
	16	16.1	16.7	16.4	16.6	16.9	16.4	15.5	14.1	13.9	13.5	13.4	13.2
	17	14.9	14.7	14.8	14.8	14.9	14.6	15.6	17.2	17.4	19.0	21.7	21.8
	18	18.4	18.8	19.4	18.6	17.9	17.4	18.5	19.8	20.9	24.1	25.4	26.9
	19	20.6	20.0	19.7	19.6	20.4	20.5	20.7	22.5	23.4	24.5	25.4	25.6
	20	21.0	21.0	20.3	20.0	19.3	19.5	20.8	22.9	24.0	25.6	27.1	28.0
	21	23.2	23.0	22.7	22.2	21.0	21.2	21.9	23.1	24.2	26.3	27.4	29.1
	22	25.3	24.2	23.6	23.5	23.0	23.0	24.0	25.0	26.2	27.3	27.6	27.0
	23	23.9	23.4	22.8	22.6	22.0	22.4	23.4	24.9	26.0	27.7	29.5	30.4
	24	23.9	23.4	22.5	22.3	21.9	22.8	23.5	24.8	26.3	27.6	29.5	30.5
	25	23.3	22.8	22.7	22.0	21.8	22.1	22.8	24.1	26.4	27.2	26.8	27.5
	26	20.8	20.1	19.6	19.6	19.7	20.1	21.2	22.7	24.9	26.0	27.5	27.3
	27	21.9	21.8	21.2	21.1	21.0	21.2	22.4	23.3	25.1	26.2	27.0	27.6
	28	22.6	22.2	21.7	21.6	21.5	21.5	22.0	22.1	22.7	24.6	24.8	24.5
	29	20.8	20.7	20.6	20.5	20.4	20.3	20.2	20.5	21.5	22.7	23.9	25.8
	30	21.7	21.2	21.0	20.7	20.3	20.5	21.7	23.0	24.5	25.9	27.3	28.7
	31	25.4	24.8	23.9	23.7	23.2	23.0	23.6	24.9	25.9	27.5	28.7	30.1
	====	=====	=====	=====	=====	=====	=====	=====	=====	=====	=====	=====	=====
	SRED	21.8	21.4	20.9	20.6	20.4	20.5	21.1	22.1	23.2	24.5	25.5	26.4
	----	-----	-----	-----	-----	-----	-----	-----	-----	-----	-----	-----	-----
	STD	2.8	2.6	2.4	2.3	2.2	2.2	2.4	2.8	3.2	3.5	3.7	3.9
	----	-----	-----	-----	-----	-----	-----	-----	-----	-----	-----	-----	-----
	MAKS	26.4	26.0	24.8	24.4	23.7	23.0	24.0	25.9	27.5	29.2	30.7	32.1
	----	-----	-----	-----	-----	-----	-----	-----	-----	-----	-----	-----	-----
	MIN	14.9	14.7	14.8	14.8	14.9	14.6	15.4	14.1	13.9	13.5	13.4	13.2
	----	-----	-----	-----	-----	-----	-----	-----	-----	-----	-----	-----	-----
	N.P.	0	0	0	0	0	0	0	0	0	0	0	0
	====	=====	=====	=====	=====	=====	=====	=====	=====	=====	=====	=====	=====
DHMZ RH Sluzba za opcu meteorologiju POSTAJA ZAGREB GRIC (236)
ODJEL ZA OBRADU I KONTROLU PODATAKA I KLIMATSKE PODLOGE MJESEC SRPANJ 7
SATNE VRIJEDNOSTI TEMPERATURE ZRAKA (ST.C) ( LIST 2 ) GODINA 2016
SIRINA 45 49 N
IZVOR Termograf IZRADA BROJ VISINA m DULJINA 15 59 E
VISINA 157 m
	----	-----	-----	-----	-----	-----	-----	-----	-----	-----	-----	-----	-----	-----	-----	-----	-----	-----	-----	-----	-----	----
	*SAT
	*	13	14	15	16	17	18	19	20	21	22	23	24	SRED-	STAN.	MAKS.	MIN.	AMPL.	MAKS.	MIN.	AMPL.	BR.
	DAN*													NJAK	DEV.	1*	1*	2*	3*	3*	4*	N.P.
	----	-----	-----	-----	-----	-----	-----	-----	-----	-----	-----	-----	-----	-----	-----	-----	-----	-----	-----	-----	-----	----
	1	28.7	29.4	29.1	29.5	29.3	29.1	28.3	27.3	25.2	24.6	24.2	23.5	25.3	3.1	29.5	20.7	8.8	29.7	20.7	9.0	0
	2	30.4	30.4	28.7	27.7	28.4	28.8	28.8	27.6	26.0	25.4	25.1	24.7	26.0	2.9	30.4	21.7	8.7	30.5	21.6	8.9	0
	3	21.1	21.6	22.2	21.7	21.2	20.2	20.1	19.8	19.3	19.3	19.2	18.6	20.9	1.5	24.7	18.6	6.1	24.7	18.6	6.1	0
	4	25.4	26.0	26.1	26.1	25.9	25.2	24.6	24.2	22.1	21.3	20.9	21.0	21.9	3.1	26.1	17.1	9.0	26.3	17.1	9.2	0
	5	28.0	28.6	28.9	28.7	28.5	28.1	27.4	26.6	24.9	24.1	23.4	22.9	24.0	3.8	28.9	18.0	10.9	28.9	18.0	10.9	0
	6	24.1	25.2	26.2	26.4	25.9	25.4	24.7	23.3	22.4	22.1	20.6	20.4	22.6	2.0	26.4	19.8	6.6	26.4	19.7	6.7	0
	7	24.4	25.6	25.9	25.9	25.5	25.1	24.5	23.8	22.2	21.6	21.3	21.1	22.1	2.6	25.9	17.9	8.0	25.9	17.7	8.2	0
	8	27.1	27.7	28.0	28.6	28.4	28.1	27.3	26.8	25.2	24.3	23.9	23.4	24.2	3.2	28.6	19.4	9.2	28.6	19.4	9.2	0
	9	29.4	29.7	30.2	29.8	29.6	28.9	28.3	27.3	25.6	24.6	24.3	23.3	25.6	2.9	30.2	21.8	8.4	30.6	21.7	8.9	0
	10	30.0	30.5	30.7	30.8	30.7	29.9	29.3	28.1	26.8	26.2	26.1	25.6	26.4	3.3	30.8	21.2	9.6	30.8	21.2	9.6	0
	11	31.9	32.8	33.0	32.7	31.9	31.2	30.4	29.5	28.8	28.0	27.5	26.9	28.0	3.4	33.0	23.0	10.0	33.1	22.9	10.2	0
	12	33.3	33.7	34.0	33.9	33.2	32.7	31.8	31.2	29.6	28.2	26.8	26.1	28.6	3.9	34.0	22.7	11.3	34.2	22.7	11.5	0
	13	30.1	30.5	30.5	30.1	29.9	29.5	28.9	28.0	25.8	23.8	23.3	21.6	26.5	2.7	30.5	21.6	8.9	30.6	21.6	9.0	0
	14	23.1	21.6	21.5	22.0	22.2	22.2	21.6	20.6	19.9	19.2	18.7	18.1	20.4	1.4	23.1	18.1	5.0	23.5	18.1	5.4	0
	15	19.8	20.3	20.2	19.8	19.7	19.6	19.5	19.5	19.4	19.1	18.7	18.3	18.2	1.5	20.3	15.4	4.9	20.4	15.1	5.3	0
	16	13.4	13.4	13.8	14.4	14.7	14.9	15.4	15.1	15.0	14.8	14.9	15.2	14.9	1.1	16.9	13.2	3.7	18.3	13.2	5.1	0
	17	22.6	24.6	25.1	24.5	24.6	23.8	22.6	21.5	20.6	19.2	18.6	18.4	19.5	3.7	25.1	14.6	10.5	25.2	14.6	10.6	0
	18	27.6	29.0	28.4	28.8	28.5	28.0	27.4	24.8	22.0	22.1	21.1	21.1	23.1	4.0	29.0	17.4	11.6	29.3	17.4	11.9	0
	19	26.7	28.2	28.0	27.4	26.7	26.5	26.1	24.8	23.4	22.3	21.7	21.4	23.6	2.8	28.2	19.6	8.6	28.3	19.6	8.7	0
	20	28.8	28.6	27.9	27.6	27.6	27.5	27.1	26.1	24.9	24.2	23.9	23.5	24.5	3.1	28.8	19.3	9.5	29.3	19.2	10.1	0
	21	29.2	30.1	30.5	30.1	30.0	29.0	28.5	27.4	26.4	25.6	25.6	25.5	26.0	3.1	30.5	21.0	9.5	30.5	20.9	9.6	0
	22	27.1	28.9	29.3	28.9	28.6	28.5	28.3	26.7	26.0	25.6	25.6	25.2	26.2	2.0	29.3	23.0	6.3	29.4	23.0	6.4	0
	23	31.5	32.2	32.8	32.3	31.7	31.3	30.2	29.0	27.5	26.4	25.3	24.4	27.2	3.6	32.8	22.0	10.8	32.8	22.0	10.8	0
	24	30.0	30.4	31.5	31.0	30.3	29.2	28.5	27.6	27.5	24.2	24.2	23.8	26.6	3.2	31.5	21.9	9.6	31.6	21.9	9.7	0
	25	26.9	25.4	23.4	22.4	22.0	23.5	23.7	22.8	22.6	21.9	21.6	21.0	23.6	1.9	27.5	21.0	6.5	27.6	21.0	6.6	0
	26	28.4	25.4	24.3	26.2	26.4	26.0	25.2	24.1	23.6	23.0	22.2	21.9	23.6	2.7	28.4	19.6	8.8	28.8	19.6	9.2	0
	27	25.6	27.6	29.1	29.0	29.1	28.6	27.0	26.2	25.1	24.8	23.2	22.9	24.9	2.8	29.1	21.0	8.1	29.3	21.0	8.3	0
	28	26.3	26.3	26.2	25.5	24.6	23.3	22.9	22.6	22.0	21.6	21.2	21.2	23.1	1.7	26.3	21.2	5.1	26.9	21.0	5.9	0
	29	27.6	28.3	28.5	28.7	27.9	27.5	26.5	25.5	23.6	23.2	22.6	22.1	23.7	3.1	28.7	20.2	8.5	28.7	20.2	8.5	0
	30	29.6	30.5	30.9	30.9	30.4	29.6	28.7	27.9	27.0	26.6	25.9	25.8	25.8	3.7	30.9	20.3	10.6	31.0	20.3	10.7	0
	31	31.5	32.2	32.2	32.4	32.0	31.0	30.1	28.4	27.2	26.2	25.8	25.1	27.5	3.2	32.4	23.0	9.4	32.5	23.0	9.5	0
	====	=====	=====	=====	=====	=====	=====	=====	=====	=====	=====	=====	=====	=====	=====	=====	=====	=====	=====	=====	=====	====
	SRED	27.1	27.6	27.6	27.5	27.3	26.8	26.2	25.3	24.1	23.3	22.8	22.4	24.0	2.8	28.3	19.8	8.5	28.5	19.8	8.7
	----	-----	-----	-----	-----	-----	-----	-----	-----	-----	-----	-----	-----	-----	-----	-----	-----	-----	-----	-----	-----	----
	STD	4.0	4.1	4.2	4.1	4.0	3.8	3.6	3.4	3.1	2.9	2.8	2.7
	----	-----	-----	-----	-----	-----	-----	-----	-----	-----	-----	-----	-----	-----	-----	-----	-----	-----	-----	-----	-----	----
	MAKS	33.3	33.7	34.0	33.9	33.2	32.7	31.8	31.2	29.6	28.2	27.5	26.9
	----	-----	-----	-----	-----	-----	-----	-----	-----	-----	-----	-----	-----	-----	-----	-----	-----	-----	-----	-----	-----	----
	MIN	13.4	13.4	13.8	14.4	14.7	14.9	15.4	15.1	15.0	14.8	14.9	15.2
	----	-----	-----	-----	-----	-----	-----	-----	-----	-----	-----	-----	-----	-----	-----	-----	-----	-----	-----	-----	-----	----
	N.P.	0	0	0	0	0	0	0	0	0	0	0	0									0
	====	=====	=====	=====	=====	=====	=====	=====	=====	=====	=====	=====	=====	=====	=====	=====	=====	=====	=====	=====	=====	====
1* IZ SATNIH VRIJEDNOSTI 1-24, 2* IZ SATNIH EKSTREMA, 3* PO DIJAGRAMU, 4* IZ EKSTREMA PO DIJAGRAMU
N.P. - BROJ NEDOSTAJUCIH PODATAKA
DHMZ RH Sluzba za opcu meteorologiju POSTAJA ZAGREB GRIC (236)
ODJEL ZA OBRADU I KONTROLU PODATAKA I KLIMATSKE PODLOGE MJESEC KOLOVOZ 8
SATNE VRIJEDNOSTI TEMPERATURE ZRAKA (ST.C) ( LIST 1 ) GODINA 2016
SIRINA 45 49 N
IZVOR Termograf IZRADA BROJ VISINA m DULJINA 15 59 E
VISINA 157 m
	----	-----	-----	-----	-----	-----	-----	-----	-----	-----	-----	-----	-----
	*SAT
	*	1	2	3	4	5	6	7	8	9	10	11	12
	DAN*
	----	-----	-----	-----	-----	-----	-----	-----	-----	-----	-----	-----	-----
	1	24.4	22.3	21.6	21.4	21.1	21.0	21.3	21.5	22.3	22.4	23.8	24.7
	2	19.3	19.2	19.2	19.2	19.2	18.9	19.8	21.3	22.6	23.3	23.9	24.7
	3	19.4	19.2	18.8	18.3	18.1	18.1	19.4	21.7	22.3	24.1	25.5	27.4
	4	22.3	21.9	20.7	20.1	19.8	20.0	21.0	22.5	24.1	25.8	27.1	28.5
	5	23.8	23.2	22.7	21.7	21.2	21.3	21.8	23.2	24.7	26.6	28.3	30.2
	6	18.0	17.8	17.9	17.6	17.4	17.4	17.2	17.6	18.3	19.9	20.5	21.7
	7	20.9	20.1	19.9	19.7	20.8	20.9	21.0	21.6	22.4	23.4	24.3	25.3
	8	19.0	18.5	18.0	17.4	17.1	17.1	18.5	20.0	21.6	23.6	24.8	25.6
	9	19.1	18.8	18.4	18.0	17.8	17.7	18.8	20.7	22.2	24.0	25.7	26.8
	10	20.7	20.4	20.1	20.2	19.8	19.8	20.0	19.8	19.7	19.7	18.8	17.9
	11	13.8	13.7	13.5	13.5	13.3	13.5	14.3	14.4	14.4	15.5	16.1	16.5
	12	12.7	12.4	12.1	11.7	11.7	11.7	12.9	14.7	16.6	18.5	19.5	20.0
	13	18.2	17.4	16.5	15.8	16.2	16.4	17.0	18.8	19.9	20.6	21.8	23.2
	14	18.2	17.6	16.8	16.5	16.1	15.9	16.8	18.0	19.7	21.7	23.2	24.6
	15	20.2	19.6	19.2	18.6	18.2	18.1	19.2	20.6	21.8	23.8	25.4	27.0
	16	17.4	17.5	17.5	17.4	17.1	17.1	17.9	18.9	19.8	21.5	22.8	24.3
	17	20.7	20.7	20.1	19.8	19.6	19.0	19.5	21.0	22.5	22.2	20.2	20.5
	18	19.0	19.0	18.9	18.8	18.9	19.0	19.1	19.9	21.1	22.2	22.3	22.0
	19	20.7	20.1	19.7	19.0	18.6	18.6	19.4	19.7	19.9	20.9	21.6	21.9
	20	20.1	18.6	18.5	18.2	17.8	17.8	18.8	19.5	20.6	22.4	23.4	25.2
	21	22.6	22.3	21.8	21.5	21.4	21.1	21.5	22.7	22.4	21.4	21.6	22.9
	22	15.8	15.4	15.3	15.0	14.9	14.8	14.8	15.6	15.5	15.8	17.3	18.2
	23	20.2	20.2	20.1	19.9	19.8	19.7	19.9	19.9	21.8	22.7	23.0	24.2
	24	19.0	18.7	19.0	19.1	17.8	17.9	20.4	21.6	22.4	23.3	24.0	25.0
	25	20.2	18.8	18.6	18.1	17.8	17.7	18.3	21.0	22.8	23.7	24.7	25.5
	26	20.1	19.0	18.0	17.6	17.2	17.0	17.8	20.6	22.5	23.4	25.2	26.1
	27	20.7	19.7	19.5	19.3	18.9	18.7	18.8	20.6	21.9	24.4	25.6	27.4
	28	20.3	19.6	19.4	19.2	18.6	17.8	18.5	19.6	21.7	23.6	25.5	26.4
	29	20.1	19.4	19.1	18.4	18.2	18.1	18.2	19.8	21.7	23.9	25.8	27.3
	30	21.8	21.2	20.7	19.9	19.6	19.7	20.5	21.7	22.8	24.6	25.4	26.5
	31	22.1	21.7	21.4	20.6	18.9	18.4	18.5	18.8	20.4	22.3	23.5	25.2
	====	=====	=====	=====	=====	=====	=====	=====	=====	=====	=====	=====	=====
	SRED	19.7	19.2	18.8	18.4	18.2	18.1	18.7	19.9	21.0	22.3	23.2	24.3
	----	-----	-----	-----	-----	-----	-----	-----	-----	-----	-----	-----	-----
	STD	2.4	2.3	2.2	2.2	2.1	2.1	2.0	2.1	2.3	2.4	2.8	3.1
	----	-----	-----	-----	-----	-----	-----	-----	-----	-----	-----	-----	-----
	MAKS	24.4	23.2	22.7	21.7	21.4	21.3	21.8	23.2	24.7	26.6	28.3	30.2
	----	-----	-----	-----	-----	-----	-----	-----	-----	-----	-----	-----	-----
	MIN	12.7	12.4	12.1	11.7	11.7	11.7	12.9	14.4	14.4	15.5	16.1	16.5
	----	-----	-----	-----	-----	-----	-----	-----	-----	-----	-----	-----	-----
	N.P.	0	0	0	0	0	0	0	0	0	0	0	0
	====	=====	=====	=====	=====	=====	=====	=====	=====	=====	=====	=====	=====
DHMZ RH Sluzba za opcu meteorologiju POSTAJA ZAGREB GRIC (236)
ODJEL ZA OBRADU I KONTROLU PODATAKA I KLIMATSKE PODLOGE MJESEC KOLOVOZ 8
SATNE VRIJEDNOSTI TEMPERATURE ZRAKA (ST.C) ( LIST 2 ) GODINA 2016
SIRINA 45 49 N
IZVOR Termograf IZRADA BROJ VISINA m DULJINA 15 59 E
VISINA 157 m
	----	-----	-----	-----	-----	-----	-----	-----	-----	-----	-----	-----	-----	-----	-----	-----	-----	-----	-----	-----	-----	----
	*SAT
	*	13	14	15	16	17	18	19	20	21	22	23	24	SRED-	STAN.	MAKS.	MIN.	AMPL.	MAKS.	MIN.	AMPL.	BR.
	DAN*													NJAK	DEV.	1*	1*	2*	3*	3*	4*	N.P.
	----	-----	-----	-----	-----	-----	-----	-----	-----	-----	-----	-----	-----	-----	-----	-----	-----	-----	-----	-----	-----	----
	1	24.5	23.4	21.5	20.8	20.8	20.8	20.8	20.7	20.5	20.6	20.2	19.5	21.7	1.4	24.7	19.5	5.2	25.1	19.5	5.6	0
	2	25.6	26.0	25.5	25.7	25.8	25.3	24.0	22.9	22.0	20.8	20.3	19.7	22.3	2.6	26.0	18.9	7.1	26.0	18.9	7.1	0
	3	27.7	28.3	28.5	28.2	27.8	27.1	26.1	25.2	24.1	23.1	22.9	22.4	23.5	3.6	28.5	18.1	10.4	28.5	18.0	10.5	0
	4	29.2	29.5	29.4	29.6	29.2	28.4	27.6	26.7	25.4	25.1	24.9	24.2	25.1	3.4	29.6	19.8	9.8	29.6	19.8	9.8	0
	5	31.1	31.4	32.0	31.2	31.0	29.8	28.1	25.9	23.2	21.6	21.1	18.9	25.6	4.1	32.0	18.9	13.1	32.0	18.9	13.1	0
	6	22.9	23.9	24.1	25.1	24.9	24.1	23.2	22.0	21.1	20.5	20.8	20.9	20.6	2.6	25.1	17.2	7.9	25.2	17.2	8.0	0
	7	25.7	26.0	26.1	26.1	25.9	25.4	24.5	22.9	21.5	21.0	20.6	20.0	22.8	2.3	26.1	19.7	6.4	26.4	19.6	6.8	0
	8	26.9	27.2	27.1	26.9	26.5	25.9	24.7	23.4	21.8	21.3	20.8	19.8	22.2	3.5	27.2	17.1	10.1	27.3	17.0	10.3	0
	9	27.6	28.1	28.2	28.0	27.4	26.7	25.9	23.0	22.1	21.6	20.8	20.6	22.8	3.7	28.2	17.7	10.5	28.3	17.7	10.6	0
	10	16.9	15.9	15.1	15.0	14.8	14.4	14.2	14.3	14.3	14.3	14.2	13.8	17.3	2.6	20.7	13.8	6.9	20.7	13.8	6.9	0
	11	18.3	17.8	17.9	18.4	18.4	17.9	17.0	15.2	14.5	13.7	13.3	13.4	15.3	1.9	18.4	13.3	5.1	18.4	13.3	5.1	0
	12	21.7	21.4	21.5	21.5	21.4	21.6	21.0	19.9	19.4	18.8	18.4	18.4	17.5	3.8	21.7	11.7	10.0	22.2	11.7	10.5	0
	13	23.9	24.9	24.9	25.0	24.0	23.3	22.6	21.4	20.1	19.3	18.5	18.2	20.3	3.0	25.0	15.8	9.2	25.4	15.8	9.6	0
	14	26.1	27.2	27.4	27.3	26.9	26.3	25.1	23.9	22.7	21.9	21.5	21.0	21.8	4.0	27.4	15.9	11.5	27.5	15.9	11.6	0
	15	28.2	29.0	29.6	29.5	28.6	24.9	23.4	20.6	18.8	18.3	18.0	17.5	22.4	4.2	29.6	17.5	12.1	29.6	17.5	12.1	0
	16	26.4	26.6	26.5	27.0	26.3	25.5	24.3	23.0	22.3	21.5	20.8	20.7	21.7	3.5	27.0	17.1	9.9	27.1	17.1	10.0	0
	17	21.3	21.5	22.1	21.9	22.1	21.9	20.9	20.4	19.7	19.4	19.1	18.9	20.6	1.1	22.5	18.9	3.6	22.7	18.9	3.8	0
	18	23.6	23.8	24.3	24.7	24.6	24.4	23.4	22.1	21.9	21.8	21.7	21.4	21.6	2.0	24.7	18.8	5.9	24.7	18.8	5.9	0
	19	24.6	25.2	24.5	24.4	24.0	23.5	22.5	21.6	20.9	20.3	19.7	19.6	21.3	2.0	25.2	18.6	6.6	25.7	18.5	7.2	0
	20	26.2	27.1	27.3	27.3	27.2	26.6	25.8	24.6	23.8	23.6	23.3	23.1	22.8	3.4	27.3	17.8	9.5	27.3	17.7	9.6	0
	21	23.7	24.1	21.4	20.8	20.6	20.6	20.6	20.6	20.4	19.6	19.2	17.5	21.3	1.4	24.1	17.5	6.6	24.4	17.5	6.9	0
	22	20.6	21.9	21.8	21.2	21.1	20.5	19.7	18.8	18.0	18.6	19.8	20.1	17.9	2.5	21.9	14.8	7.1	22.1	14.7	7.4	0
	23	24.5	25.2	25.4	25.4	25.2	24.5	23.5	21.6	20.9	20.5	20.6	19.5	22.0	2.1	25.4	19.5	5.9	25.4	19.5	5.9	0
	24	25.8	25.9	26.5	26.3	26.3	25.7	24.4	23.2	22.2	21.8	21.5	21.4	22.5	2.8	26.5	17.8	8.7	26.6	17.8	8.8	0
	25	25.7	26.4	26.5	26.2	25.8	24.9	24.6	22.5	22.0	20.7	20.6	20.8	22.2	3.0	26.5	17.7	8.8	26.8	17.7	9.1	0
	26	26.9	27.1	27.4	27.2	27.0	25.9	25.2	23.3	23.1	22.5	22.4	22.0	22.7	3.5	27.4	17.0	10.4	27.4	17.0	10.4	0
	27	28.0	29.0	28.7	28.4	28.1	27.2	25.9	24.2	23.4	22.1	21.5	21.0	23.5	3.6	29.0	18.7	10.3	29.0	18.6	10.4	0
	28	27.7	28.3	28.4	28.2	27.5	27.0	25.1	23.5	22.7	21.7	21.9	20.4	23.0	3.5	28.4	17.8	10.6	28.4	17.8	10.6	0
	29	28.7	29.3	29.8	29.7	29.1	28.0	26.7	24.9	24.4	24.5	23.8	23.6	23.9	4.1	29.8	18.1	11.7	29.8	18.0	11.8	0
	30	26.2	27.6	27.7	27.6	27.6	26.7	25.7	23.8	22.9	22.9	22.7	22.3	23.7	2.7	27.7	19.6	8.1	27.8	19.6	8.2	0
	31	25.5	26.0	26.3	26.2	25.7	24.9	24.2	22.3	21.5	21.0	20.6	20.5	22.4	2.6	26.3	18.4	7.9	26.4	18.4	8.0	0
	====	=====	=====	=====	=====	=====	=====	=====	=====	=====	=====	=====	=====	=====	=====	=====	=====	=====	=====	=====	=====	====
	SRED	25.2	25.6	25.6	25.5	25.2	24.5	23.6	22.2	21.3	20.8	20.5	20.0	21.8	2.9	26.1	17.5	8.6	26.3	17.5	8.8
	----	-----	-----	-----	-----	-----	-----	-----	-----	-----	-----	-----	-----	-----	-----	-----	-----	-----	-----	-----	-----	----
	STD	3.0	3.3	3.6	3.5	3.4	3.2	2.9	2.6	2.4	2.4	2.3	2.3
	----	-----	-----	-----	-----	-----	-----	-----	-----	-----	-----	-----	-----	-----	-----	-----	-----	-----	-----	-----	-----	----
	MAKS	31.1	31.4	32.0	31.2	31.0	29.8	28.1	26.7	25.4	25.1	24.9	24.2
	----	-----	-----	-----	-----	-----	-----	-----	-----	-----	-----	-----	-----	-----	-----	-----	-----	-----	-----	-----	-----	----
	MIN	16.9	15.9	15.1	15.0	14.8	14.4	14.2	14.3	14.3	13.7	13.3	13.4
	----	-----	-----	-----	-----	-----	-----	-----	-----	-----	-----	-----	-----	-----	-----	-----	-----	-----	-----	-----	-----	----
	N.P.	0	0	0	0	0	0	0	0	0	0	0	0									0
	====	=====	=====	=====	=====	=====	=====	=====	=====	=====	=====	=====	=====	=====	=====	=====	=====	=====	=====	=====	=====	====
1* IZ SATNIH VRIJEDNOSTI 1-24, 2* IZ SATNIH EKSTREMA, 3* PO DIJAGRAMU, 4* IZ EKSTREMA PO DIJAGRAMU
N.P. - BROJ NEDOSTAJUCIH PODATAKA
DHMZ RH Sluzba za opcu meteorologiju POSTAJA ZAGREB GRIC (236)
ODJEL ZA OBRADU I KONTROLU PODATAKA I KLIMATSKE PODLOGE MJESEC RUJAN 9
SATNE VRIJEDNOSTI TEMPERATURE ZRAKA (ST.C) ( LIST 1 ) GODINA 2016
SIRINA 45 49 N
IZVOR Termograf IZRADA BROJ VISINA m DULJINA 15 59 E
VISINA 157 m
	----	-----	-----	-----	-----	-----	-----	-----	-----	-----	-----	-----	-----
	*SAT
	*	1	2	3	4	5	6	7	8	9	10	11	12
	DAN*
	----	-----	-----	-----	-----	-----	-----	-----	-----	-----	-----	-----	-----
	1	19.6	18.6	18.4	17.6	17.2	17.1	17.7	19.7	20.6	22.5	24.3	25.8
	2	20.2	20.1	19.5	19.4	19.0	18.6	18.9	20.2	22.2	24.4	26.3	26.6
	3	20.6	19.8	19.6	19.5	18.9	18.7	19.0	20.6	21.7	23.5	25.4	26.4
	4	20.4	19.8	19.7	19.0	18.5	18.2	18.8	20.1	21.6	22.6	24.6	26.5
	5	22.4	21.8	20.5	19.4	18.7	18.3	17.9	17.4	17.4	17.3	17.4	17.3
	6	16.6	16.5	16.5	15.9	16.2	16.5	17.5	18.4	18.3	16.9	16.8	16.4
	7	17.5	17.7	17.8	18.5	18.6	18.7	19.7	19.7	20.5	21.4	21.3	23.2
	8	21.5	21.0	20.5	20.0	19.8	19.7	19.0	21.0	22.5	23.7	24.7	25.3
	9	22.8	20.0	19.2	18.5	18.4	18.1	18.4	20.1	22.4	25.7	26.5	27.7
	10	24.2	24.1	23.1	22.3	21.3	20.2	20.3	21.6	24.7	25.5	26.7	27.6
	11	22.3	21.6	20.5	19.6	19.3	18.8	19.6	21.4	24.3	25.7	26.6	27.6
	12	22.4	22.2	22.0	21.6	21.7	20.8	20.3	21.1	22.9	24.6	26.4	27.5
	13	20.7	20.5	19.9	19.8	19.5	19.1	18.9	20.2	21.9	23.3	24.9	26.7
	14	20.6	19.8	19.3	19.3	18.8	18.7	18.6	19.4	20.9	22.5	23.8	24.8
	15	19.2	19.1	18.9	18.4	18.0	17.7	17.9	19.2	20.7	21.9	23.0	25.5
	16	19.3	19.1	18.7	18.3	18.0	17.9	18.6	20.0	21.7	23.1	24.7	26.5
	17	18.9	18.6	18.6	18.3	18.1	17.8	17.5	17.6	18.5	19.7	21.4	22.2
	18	17.5	17.2	16.8	16.9	16.7	16.6	16.2	16.5	16.8	17.0	17.8	20.6
	19	16.8	16.9	17.1	17.4	16.9	16.4	16.4	16.5	17.4	17.5	18.6	19.5
	20	16.8	16.7	16.1	15.6	15.4	15.1	15.3	16.1	16.6	16.9	17.7	18.1
	21	15.5	14.8	14.5	14.5	14.4	13.8	13.6	13.9	15.2	16.6	18.1	18.1
	22	11.5	11.2	10.7	10.4	10.2	10.0	10.4	12.4	13.6	15.5	16.5	17.5
	23	11.6	10.8	10.8	10.0	9.7	9.6	9.6	10.7	12.4	14.4	15.9	17.9
	24	13.7	13.2	12.6	11.9	11.6	11.5	11.2	12.4	13.8	16.0	17.9	19.8
	25	13.7	12.7	12.6	12.1	11.7	11.1	11.1	12.4	13.8	15.9	16.8	19.8
	26	13.5	12.8	12.6	12.3	12.1	11.6	11.5	11.9	13.5	15.0	17.4	19.3
	27	13.4	13.0	12.5	12.8	12.6	12.2	12.3	13.5	14.7	16.1	17.9	19.3
	28	13.7	12.8	12.4	11.8	11.4	10.9	10.8	11.7	13.0	14.9	17.1	19.7
	29	12.6	11.7	11.0	10.8	10.6	10.6	10.8	11.9	13.5	15.6	17.8	20.5
	30	14.3	13.7	13.3	13.3	13.1	12.7	12.6	14.3	16.4	18.5	20.5	21.6
	====	=====	=====	=====	=====	=====	=====	=====	=====	=====	=====	=====	=====
	SRED	17.8	17.3	16.9	16.5	16.2	15.9	16.0	17.1	18.4	19.8	21.2	22.5
	----	-----	-----	-----	-----	-----	-----	-----	-----	-----	-----	-----	-----
	STD	3.7	3.7	3.6	3.5	3.5	3.4	3.5	3.5	3.7	3.8	3.8	3.8
	----	-----	-----	-----	-----	-----	-----	-----	-----	-----	-----	-----	-----
	MAKS	24.2	24.1	23.1	22.3	21.7	20.8	20.3	21.6	24.7	25.7	26.7	27.7
	----	-----	-----	-----	-----	-----	-----	-----	-----	-----	-----	-----	-----
	MIN	11.5	10.8	10.7	10.0	9.7	9.6	9.6	10.7	12.4	14.4	15.9	16.4
	----	-----	-----	-----	-----	-----	-----	-----	-----	-----	-----	-----	-----
	N.P.	0	0	0	0	0	0	0	0	0	0	0	0
	====	=====	=====	=====	=====	=====	=====	=====	=====	=====	=====	=====	=====
DHMZ RH Sluzba za opcu meteorologiju POSTAJA ZAGREB GRIC (236)
ODJEL ZA OBRADU I KONTROLU PODATAKA I KLIMATSKE PODLOGE MJESEC RUJAN 9
SATNE VRIJEDNOSTI TEMPERATURE ZRAKA (ST.C) ( LIST 2 ) GODINA 2016
SIRINA 45 49 N
IZVOR Termograf IZRADA BROJ VISINA m DULJINA 15 59 E
VISINA 157 m
	----	-----	-----	-----	-----	-----	-----	-----	-----	-----	-----	-----	-----	-----	-----	-----	-----	-----	-----	-----	-----	----
	*SAT
	*	13	14	15	16	17	18	19	20	21	22	23	24	SRED-	STAN.	MAKS.	MIN.	AMPL.	MAKS.	MIN.	AMPL.	BR.
	DAN*													NJAK	DEV.	1*	1*	2*	3*	3*	4*	N.P.
	----	-----	-----	-----	-----	-----	-----	-----	-----	-----	-----	-----	-----	-----	-----	-----	-----	-----	-----	-----	-----	----
	1	26.9	27.1	27.7	27.6	27.2	26.2	24.7	23.4	22.1	21.7	21.1	20.4	22.3	3.6	27.7	17.1	10.6	27.7	17.0	10.7	0
	2	27.2	26.2	27.3	28.1	27.4	26.7	25.5	24.4	23.7	23.3	22.0	21.3	23.3	3.2	28.1	18.6	9.5	28.1	18.6	9.5	0
	3	27.9	28.3	27.8	27.2	27.2	26.4	25.4	24.4	23.5	22.7	21.9	21.2	23.2	3.2	28.3	18.7	9.6	28.4	18.6	9.8	0
	4	28.0	28.8	29.0	28.9	28.5	27.6	26.4	25.4	24.9	23.9	22.8	22.7	23.6	3.7	29.0	18.2	10.8	29.1	18.2	10.9	0
	5	17.3	19.4	19.6	20.3	19.6	19.3	18.4	17.5	16.8	16.7	16.7	16.5	18.5	1.6	22.4	16.5	5.9	22.7	16.5	6.2	0
	6	16.0	16.5	16.5	16.9	17.5	17.6	17.4	17.7	17.7	17.7	17.8	17.6	17.1	0.7	18.4	15.9	2.5	18.4	15.9	2.5	0
	7	25.0	25.1	25.3	24.6	23.7	23.4	22.4	22.2	21.9	21.5	21.7	21.8	21.4	2.4	25.3	17.5	7.8	25.4	17.5	7.9	0
	8	26.4	26.6	26.5	26.4	25.9	25.6	24.2	23.2	23.0	22.8	22.3	22.4	23.1	2.4	26.6	19.0	7.6	26.7	18.8	7.9	0
	9	28.2	28.4	28.3	28.0	27.9	26.9	25.4	24.7	24.6	24.5	24.4	24.4	23.9	3.6	28.4	18.1	10.3	28.5	18.1	10.4	0
	10	28.2	28.5	28.6	28.2	28.0	26.6	25.7	25.6	24.6	23.9	23.5	22.7	24.8	2.6	28.6	20.2	8.4	28.7	20.2	8.5	0
	11	28.3	28.8	29.0	28.6	28.4	27.3	25.3	25.0	24.9	23.9	23.5	22.8	24.3	3.3	29.0	18.8	10.2	29.0	18.8	10.2	0
	12	28.5	29.2	29.4	29.1	28.5	27.1	25.5	24.5	23.5	22.7	22.0	21.4	24.4	3.0	29.4	20.3	9.1	29.4	20.3	9.1	0
	13	28.0	28.4	28.8	28.6	28.1	26.9	24.8	23.8	22.4	21.8	21.7	21.1	23.3	3.4	28.8	18.9	9.9	28.8	18.8	10.0	0
	14	26.0	26.2	24.7	25.1	25.4	24.2	22.7	21.9	20.9	20.5	19.9	19.5	21.8	2.5	26.2	18.6	7.6	26.6	18.6	8.0	0
	15	26.8	27.0	27.3	26.9	26.4	25.3	24.0	22.9	21.8	21.6	20.5	20.0	22.1	3.3	27.3	17.7	9.6	27.4	17.7	9.7	0
	16	25.5	25.5	26.0	25.7	25.5	24.5	21.6	20.5	20.2	19.6	19.5	19.4	21.6	3.0	26.5	17.9	8.6	26.5	17.9	8.6	0
	17	22.7	23.4	24.1	23.1	22.0	20.6	19.9	19.5	18.8	18.8	18.4	17.6	19.8	2.0	24.1	17.5	6.6	24.1	17.5	6.6	0
	18	21.8	21.9	21.6	21.3	20.9	20.0	18.9	17.8	17.4	16.7	16.8	16.7	18.3	2.0	21.9	16.2	5.7	22.2	16.2	6.0	0
	19	20.6	21.4	21.6	21.9	19.5	18.6	17.9	17.9	18.6	18.0	17.8	17.4	18.3	1.6	21.9	16.4	5.5	21.9	16.4	5.5	0
	20	19.9	20.3	21.0	20.7	20.2	19.1	18.7	17.7	17.0	16.6	16.2	15.8	17.5	1.8	21.0	15.1	5.9	21.0	15.1	5.9	0
	21	17.5	17.3	17.1	17.0	16.7	16.4	14.4	13.8	13.5	13.3	12.6	11.9	15.2	1.8	18.1	11.9	6.2	18.1	11.9	6.2	0
	22	18.3	18.7	18.3	18.3	17.8	17.4	15.5	14.4	13.8	13.7	12.7	12.1	14.2	3.0	18.7	10.0	8.7	18.7	9.8	8.9	0
	23	19.5	20.0	20.7	20.4	20.3	18.8	17.5	16.4	15.9	15.4	14.9	14.3	14.9	3.8	20.7	9.6	11.1	20.7	9.5	11.2	0
	24	20.9	21.4	21.5	21.6	20.6	20.0	18.3	16.7	15.7	15.2	15.1	13.8	16.1	3.6	21.6	11.2	10.4	21.8	11.2	10.6	0
	25	20.5	21.0	21.1	20.9	20.7	19.8	18.6	16.7	16.5	16.3	15.1	14.4	16.1	3.4	21.1	11.1	10.0	21.1	10.9	10.2	0
	26	18.6	19.0	19.9	20.0	19.8	18.5	17.1	15.9	16.3	14.9	14.2	13.8	15.5	2.9	20.0	11.5	8.5	20.2	11.5	8.7	0
	27	20.9	21.0	21.3	20.5	20.3	19.0	17.4	16.9	16.5	16.3	14.6	14.0	16.2	3.1	21.3	12.2	9.1	21.5	12.1	9.4	0
	28	20.7	21.4	21.2	20.8	20.3	18.9	16.9	16.4	15.2	14.6	14.0	13.2	15.6	3.6	21.4	10.8	10.6	21.5	10.7	10.8	0
	29	21.7	22.6	22.9	23.1	22.8	21.3	19.3	18.9	18.1	16.8	15.8	14.6	16.5	4.5	23.1	10.6	12.5	23.2	10.5	12.7	0
	30	22.5	23.2	23.7	23.5	22.9	20.7	19.3	17.9	17.2	16.5	16.2	15.6	17.6	3.8	23.7	12.6	11.1	23.8	12.6	11.2	0
	====	=====	=====	=====	=====	=====	=====	=====	=====	=====	=====	=====	=====	=====	=====	=====	=====	=====	=====	=====	=====	====
	SRED	23.3	23.8	23.9	23.8	23.3	22.4	21.0	20.1	19.6	19.1	18.5	18.0	19.7	2.9	24.3	15.6	8.7	24.4	15.6	8.8
	----	-----	-----	-----	-----	-----	-----	-----	-----	-----	-----	-----	-----	-----	-----	-----	-----	-----	-----	-----	-----	----
	STD	3.9	3.8	3.8	3.7	3.8	3.7	3.6	3.6	3.5	3.5	3.5	3.6
	----	-----	-----	-----	-----	-----	-----	-----	-----	-----	-----	-----	-----	-----	-----	-----	-----	-----	-----	-----	-----	----
	MAKS	28.5	29.2	29.4	29.1	28.5	27.6	26.4	25.6	24.9	24.5	24.4	24.4
	----	-----	-----	-----	-----	-----	-----	-----	-----	-----	-----	-----	-----	-----	-----	-----	-----	-----	-----	-----	-----	----
	MIN	16.0	16.5	16.5	16.9	16.7	16.4	14.4	13.8	13.5	13.3	12.6	11.9
	----	-----	-----	-----	-----	-----	-----	-----	-----	-----	-----	-----	-----	-----	-----	-----	-----	-----	-----	-----	-----	----
	N.P.	0	0	0	0	0	0	0	0	0	0	0	0									0
	====	=====	=====	=====	=====	=====	=====	=====	=====	=====	=====	=====	=====	=====	=====	=====	=====	=====	=====	=====	=====	====
1* IZ SATNIH VRIJEDNOSTI 1-24, 2* IZ SATNIH EKSTREMA, 3* PO DIJAGRAMU, 4* IZ EKSTREMA PO DIJAGRAMU
N.P. - BROJ NEDOSTAJUCIH PODATAKA
DHMZ RH Sluzba za opcu meteorologiju POSTAJA ZAGREB GRIC (236)
ODJEL ZA OBRADU I KONTROLU PODATAKA I KLIMATSKE PODLOGE MJESEC LISTOPAD 10
SATNE VRIJEDNOSTI TEMPERATURE ZRAKA (ST.C) ( LIST 1 ) GODINA 2016
SIRINA 45 49 N
IZVOR Termograf IZRADA BROJ VISINA m DULJINA 15 59 E
VISINA 157 m
	----	-----	-----	-----	-----	-----	-----	-----	-----	-----	-----	-----	-----
	*SAT
	*	1	2	3	4	5	6	7	8	9	10	11	12
	DAN*
	----	-----	-----	-----	-----	-----	-----	-----	-----	-----	-----	-----	-----
	1	15.4	14.8	14.5	14.3	14.3	14.4	14.9	16.0	17.5	19.9	22.2	23.7
	2	16.0	15.8	15.8	15.4	15.5	15.6	15.6	15.6	15.9	16.5	17.5	17.6
	3	15.2	15.4	15.3	15.0	13.9	13.3	12.9	12.7	12.5	13.0	13.2	13.2
	4	8.8	9.6	8.8	8.5	8.1	7.6	7.6	8.9	11.3	12.5	13.6	16.0
	5	10.6	10.0	9.6	9.2	9.0	7.7	7.5	8.2	9.3	10.7	11.2	12.1
	6	5.9	5.0	5.0	5.0	4.5	4.0	4.9	4.9	7.1	10.0	12.1	13.7
	7	9.1	8.9	9.1	9.2	9.2	9.3	9.3	9.8	10.7	13.0	13.1	12.5
	8	7.0	6.4	6.0	5.2	4.8	4.8	4.9	6.3	7.7	10.1	11.2	11.9
	9	9.5	8.6	8.7	8.6	8.5	8.6	9.3	10.4	10.6	11.5	12.8	13.6
	10	10.0	9.8	9.9	9.5	9.6	9.7	9.9	10.0	10.0	9.9	9.8	9.8
	11	7.1	7.2	7.3	7.2	7.2	7.2	7.2	7.4	7.6	7.9	8.1	8.8
	12	7.5	6.8	5.5	5.3	5.1	5.2	5.8	6.2	6.6	8.0	8.9	10.0
	13	6.4	5.7	5.2	5.0	4.7	4.6	4.4	5.0	6.0	7.3	9.0	10.6
	14	11.0	10.8	10.6	10.1	9.9	10.2	10.3	11.2	11.4	12.5	13.3	13.4
	15	11.4	10.8	9.8	10.3	10.4	9.6	9.4	9.4	10.7	12.6	13.2	13.4
	16	12.0	12.1	12.1	12.3	12.3	12.1	12.1	12.1	13.1	14.5	15.1	16.2
	17	11.7	11.2	10.7	10.1	9.7	9.6	9.0	9.7	10.1	11.1	11.5	13.7
	18	12.7	12.4	11.9	11.4	10.8	10.2	9.4	9.2	9.2	9.0	9.3	9.9
	19	9.0	9.1	9.2	9.4	9.5	9.5	9.6	9.6	9.8	10.9	11.3	11.7
	20	9.8	9.8	9.8	9.8	9.7	9.7	9.8	9.9	9.9	10.0	9.7	9.7
	21	9.1	8.4	8.3	8.2	8.2	8.0	8.1	8.4	8.6	9.2	9.4	9.7
	22	6.2	5.8	5.2	5.1	5.0	4.3	4.1	5.4	5.3	6.1	7.7	8.7
	23	4.8	5.0	5.2	5.1	4.9	5.1	5.3	6.6	7.0	7.4	8.1	9.2
	24	9.8	9.6	9.8	9.9	9.9	8.8	8.8	9.1	11.3	13.5	14.5	15.3
	25	16.0	16.0	15.6	16.2	16.1	15.7	15.7	16.8	17.7	19.5	20.4	20.8
	26	16.4	15.0	14.8	14.7	14.6	14.1	14.2	14.4	14.9	15.9	16.0	16.1
	27	12.3	11.8	11.7	11.8	11.0	11.0	11.1	10.4	10.3	10.6	10.8	11.3
	28	10.3	10.0	10.0	9.7	8.9	8.1	7.9	8.7	9.5	10.5	11.5	12.7
	29	6.6	6.4	6.4	6.4	6.4	6.3	6.1	6.7	7.3	9.0	10.9	12.6
	30	10.6	9.8	9.6	9.5	8.7	7.5	7.9	8.7	9.4	11.1	12.2	13.0
	31	9.7	9.0	8.9	8.4	8.1	6.7	6.1	6.7	7.6	9.0	10.5	11.2
	====	=====	=====	=====	=====	=====	=====	=====	=====	=====	=====	=====	=====
	SRED	10.3	9.9	9.7	9.5	9.3	9.0	9.0	9.5	10.2	11.4	12.2	13.0
	----	-----	-----	-----	-----	-----	-----	-----	-----	-----	-----	-----	-----
	STD	3.1	3.1	3.1	3.2	3.2	3.2	3.2	3.1	3.1	3.2	3.3	3.4
	----	-----	-----	-----	-----	-----	-----	-----	-----	-----	-----	-----	-----
	MAKS	16.4	16.0	15.8	16.2	16.1	15.7	15.7	16.8	17.7	19.9	22.2	23.7
	----	-----	-----	-----	-----	-----	-----	-----	-----	-----	-----	-----	-----
	MIN	4.8	5.0	5.0	5.0	4.5	4.0	4.1	4.9	5.3	6.1	7.7	8.7
	----	-----	-----	-----	-----	-----	-----	-----	-----	-----	-----	-----	-----
	N.P.	0	0	0	0	0	0	0	0	0	0	0	0
	====	=====	=====	=====	=====	=====	=====	=====	=====	=====	=====	=====	=====
DHMZ RH Sluzba za opcu meteorologiju POSTAJA ZAGREB GRIC (236)
ODJEL ZA OBRADU I KONTROLU PODATAKA I KLIMATSKE PODLOGE MJESEC LISTOPAD 10
SATNE VRIJEDNOSTI TEMPERATURE ZRAKA (ST.C) ( LIST 2 ) GODINA 2016
SIRINA 45 49 N
IZVOR Termograf IZRADA BROJ VISINA m DULJINA 15 59 E
VISINA 157 m
	----	-----	-----	-----	-----	-----	-----	-----	-----	-----	-----	-----	-----	-----	-----	-----	-----	-----	-----	-----	-----	----
	*SAT
	*	13	14	15	16	17	18	19	20	21	22	23	24	SRED-	STAN.	MAKS.	MIN.	AMPL.	MAKS.	MIN.	AMPL.	BR.
	DAN*													NJAK	DEV.	1*	1*	2*	3*	3*	4*	N.P.
	----	-----	-----	-----	-----	-----	-----	-----	-----	-----	-----	-----	-----	-----	-----	-----	-----	-----	-----	-----	-----	----
	1	24.3	24.6	24.3	23.5	22.5	21.3	19.5	18.9	17.5	17.4	17.1	16.4	18.7	3.6	24.6	14.3	10.3	24.7	14.2	10.5	0
	2	16.7	15.8	15.7	15.7	15.7	15.7	15.6	15.6	15.6	15.5	15.6	15.4	15.9	0.6	17.6	15.4	2.2	17.7	15.4	2.3	0
	3	12.9	13.3	13.9	14.0	13.9	13.2	12.5	11.1	10.7	10.0	9.6	9.1	12.9	1.7	15.4	9.1	6.3	15.4	9.1	6.3	0
	4	16.5	15.2	14.7	14.6	14.4	13.9	14.1	13.9	13.2	12.9	12.5	11.4	12.0	2.8	16.5	7.6	8.9	16.5	7.3	9.2	0
	5	12.5	13.0	13.3	12.9	13.0	11.1	9.7	8.1	8.0	7.7	6.9	6.8	9.9	2.1	13.3	6.8	6.5	13.3	6.7	6.6	0
	6	14.9	16.3	15.9	15.6	15.4	13.5	12.5	11.1	11.1	9.8	9.7	9.3	9.9	4.2	16.3	4.0	12.3	16.3	4.0	12.3	0
	7	12.6	13.2	12.9	11.5	11.0	10.8	10.3	9.4	9.0	8.3	6.9	6.9	10.2	1.8	13.2	6.9	6.3	13.2	6.9	6.3	0
	8	13.2	13.9	13.9	13.9	13.2	11.5	10.8	10.4	9.9	9.9	9.9	9.8	9.4	3.1	13.9	4.8	9.1	13.9	4.8	9.1	0
	9	13.9	14.5	14.6	14.1	13.3	11.7	11.4	10.9	10.6	10.4	10.2	9.9	11.1	2.0	14.6	8.5	6.1	14.7	8.5	6.2	0
	10	9.7	9.4	8.8	8.2	7.8	7.2	7.1	7.1	7.1	7.0	7.1	7.0	8.8	1.2	10.0	7.0	3.0	10.0	6.9	3.1	0
	11	9.0	9.2	9.1	8.8	8.8	8.6	8.3	8.2	8.3	8.4	8.2	8.0	8.0	0.7	9.2	7.1	2.1	9.2	7.0	2.2	0
	12	11.7	11.8	12.5	12.9	13.0	11.4	9.8	9.2	8.5	7.3	7.0	6.5	8.4	2.6	13.0	5.1	7.9	13.0	5.1	7.9	0
	13	11.9	12.8	13.3	13.8	13.5	12.4	12.0	12.1	12.0	11.9	11.6	11.1	9.3	3.4	13.8	4.4	9.4	13.8	4.4	9.4	0
	14	13.8	14.0	14.7	14.8	14.9	14.2	13.6	13.0	12.8	12.7	12.2	11.8	12.4	1.6	14.9	9.9	5.0	15.0	9.9	5.1	0
	15	13.0	12.6	11.6	11.5	11.8	11.8	11.9	12.3	12.3	12.0	11.9	12.0	11.5	1.2	13.4	9.4	4.0	13.4	9.4	4.0	0
	16	17.1	17.7	18.1	18.0	17.6	15.9	14.8	13.8	13.2	12.8	12.8	12.0	14.2	2.2	18.1	12.0	6.1	18.2	12.0	6.2	0
	17	15.4	16.5	16.4	16.1	15.8	14.6	14.0	14.3	14.1	13.0	12.8	12.8	12.7	2.4	16.5	9.0	7.5	16.5	9.0	7.5	0
	18	9.8	9.7	9.3	9.3	9.0	9.0	9.1	9.3	9.3	9.5	9.3	9.3	9.9	1.1	12.7	9.0	3.7	12.8	8.9	3.9	0
	19	12.2	12.5	12.3	11.8	11.6	11.4	11.1	10.9	10.6	10.0	9.8	9.8	10.5	1.1	12.5	9.0	3.5	12.5	9.0	3.5	0
	20	9.7	10.1	9.3	9.7	9.6	9.5	9.5	9.5	9.3	9.1	8.6	8.9	9.6	0.3	10.1	8.6	1.5	10.1	8.6	1.5	0
	21	9.8	9.6	9.4	9.5	9.5	9.4	8.7	8.6	8.5	7.7	7.4	6.7	8.7	0.8	9.8	6.7	3.1	9.8	6.7	3.1	0
	22	9.1	9.5	10.0	9.8	8.7	7.9	7.4	6.8	6.8	6.0	5.7	4.8	6.7	1.8	10.0	4.1	5.9	10.0	4.1	5.9	0
	23	10.3	10.6	11.3	11.9	11.4	10.0	9.4	10.0	10.2	10.0	10.2	10.1	8.3	2.4	11.9	4.8	7.1	11.9	4.8	7.1	0
	24	16.2	16.6	17.6	17.6	17.0	15.9	16.7	15.1	14.5	15.0	15.5	15.5	13.5	3.1	17.6	8.8	8.8	17.8	8.6	9.2	0
	25	21.6	21.7	22.0	21.6	20.8	19.7	18.5	18.0	17.5	17.1	16.6	16.5	18.3	2.2	22.0	15.6	6.4	22.1	15.5	6.6	0
	26	16.1	16.5	16.6	16.5	15.6	14.7	14.4	13.9	13.0	12.9	12.5	12.5	14.8	1.3	16.6	12.5	4.1	16.6	12.5	4.1	0
	27	12.4	13.0	12.9	12.8	12.1	10.8	10.0	10.1	10.2	10.8	10.9	10.8	11.3	0.9	13.0	10.0	3.0	13.0	10.0	3.0	0
	28	13.3	13.5	13.6	13.5	12.6	10.7	9.1	8.6	8.2	7.7	7.2	6.8	10.1	2.1	13.6	6.8	6.8	13.8	6.8	7.0	0
	29	13.8	14.4	14.9	14.9	14.4	12.9	12.1	12.1	12.0	11.6	11.4	11.0	10.3	3.2	14.9	6.1	8.8	15.0	6.1	8.9	0
	30	13.9	14.2	14.4	14.5	14.0	11.8	11.0	10.5	10.2	10.5	10.5	10.3	11.0	2.0	14.5	7.5	7.0	14.5	7.4	7.1	0
	31	11.9	12.4	12.8	12.6	12.0	10.4	9.0	8.2	8.0	7.5	6.8	6.1	9.2	2.1	12.8	6.1	6.7	12.8	6.1	6.7	0
	====	=====	=====	=====	=====	=====	=====	=====	=====	=====	=====	=====	=====	=====	=====	=====	=====	=====	=====	=====	=====	====
	SRED	13.5	13.8	13.9	13.7	13.4	12.4	11.7	11.3	11.0	10.7	10.5	10.2	11.2	2.0	14.4	8.3	6.1	14.4	8.2	6.2
	----	-----	-----	-----	-----	-----	-----	-----	-----	-----	-----	-----	-----	-----	-----	-----	-----	-----	-----	-----	-----	----
	STD	3.4	3.4	3.5	3.4	3.3	3.1	3.0	3.0	2.8	2.9	3.0	3.0
	----	-----	-----	-----	-----	-----	-----	-----	-----	-----	-----	-----	-----	-----	-----	-----	-----	-----	-----	-----	-----	----
	MAKS	24.3	24.6	24.3	23.5	22.5	21.3	19.5	18.9	17.5	17.4	17.1	16.5
	----	-----	-----	-----	-----	-----	-----	-----	-----	-----	-----	-----	-----	-----	-----	-----	-----	-----	-----	-----	-----	----
	MIN	9.0	9.2	8.8	8.2	7.8	7.2	7.1	6.8	6.8	6.0	5.7	4.8
	----	-----	-----	-----	-----	-----	-----	-----	-----	-----	-----	-----	-----	-----	-----	-----	-----	-----	-----	-----	-----	----
	N.P.	0	0	0	0	0	0	0	0	0	0	0	0									0
	====	=====	=====	=====	=====	=====	=====	=====	=====	=====	=====	=====	=====	=====	=====	=====	=====	=====	=====	=====	=====	====
1* IZ SATNIH VRIJEDNOSTI 1-24, 2* IZ SATNIH EKSTREMA, 3* PO DIJAGRAMU, 4* IZ EKSTREMA PO DIJAGRAMU
N.P. - BROJ NEDOSTAJUCIH PODATAKA
DHMZ RH Sluzba za opcu meteorologiju POSTAJA ZAGREB GRIC (236)
ODJEL ZA OBRADU I KONTROLU PODATAKA I KLIMATSKE PODLOGE MJESEC STUDENI 11
SATNE VRIJEDNOSTI TEMPERATURE ZRAKA (ST.C) ( LIST 1 ) GODINA 2016
SIRINA 45 49 N
IZVOR Termograf IZRADA BROJ VISINA m DULJINA 15 59 E
VISINA 157 m
	----	-----	-----	-----	-----	-----	-----	-----	-----	-----	-----	-----	-----
	*SAT
	*	1	2	3	4	5	6	7	8	9	10	11	12
	DAN*
	----	-----	-----	-----	-----	-----	-----	-----	-----	-----	-----	-----	-----
	1	5.8	5.2	4.9	4.0	3.6	3.3	3.0	3.6	3.7	5.9	8.0	10.1
	2	6.9	7.4	7.0	8.0	8.3	8.7	9.4	10.5	11.4	14.1	15.6	15.9
	3	8.2	7.8	7.8	7.5	7.4	7.1	7.0	6.8	6.7	6.7	7.4	7.5
	4	4.6	4.3	3.2	2.8	2.5	0.8	1.4	1.8	2.0	3.1	4.2	4.2
	5	3.8	4.0	3.8	3.3	3.2	2.9	3.2	4.2	4.7	6.3	6.6	8.6
	6	14.7	13.7	13.8	14.0	13.9	14.1	13.9	13.9	13.9	14.7	13.9	14.4
	7	7.7	7.0	6.6	6.1	6.0	5.9	5.9	5.9	6.3	6.6	7.8	8.1
	8	7.1	6.9	6.0	5.9	5.6	4.9	4.7	4.4	3.9	3.9	4.0	4.3
	9	4.1	4.2	4.1	4.3	4.1	4.0	4.0	4.2	4.7	5.3	6.1	6.9
	10	4.6	4.7	4.5	4.3	4.0	3.9	3.7	3.8	4.9	6.0	6.2	8.2
	11	4.6	4.0	3.8	3.8	3.6	3.7	3.6	3.7	3.9	5.1	6.8	7.3
	12	5.8	6.2	6.4	6.0	5.9	5.7	5.1	4.8	4.5	3.6	3.3	3.2
	13	2.3	2.0	2.2	2.6	2.8	2.8	2.4	2.5	2.6	3.1	4.0	4.5
	14	2.3	2.1	1.5	1.0	0.6	0.2	0.1	0.5	1.2	2.5	3.2	4.1
	15	0.8	0.8	0.4	-0.2	-0.3	-0.2	0.5	1.0	1.3	2.4	2.6	4.5
	16	0.4	1.0	1.1	1.2	1.1	1.1	1.1	1.4	1.8	2.3	3.3	4.9
	17	4.7	4.2	4.2	4.0	3.9	3.9	4.4	4.9	6.0	8.8	9.8	10.8
	18	8.2	8.8	8.3	8.3	8.9	9.3	9.9	10.3	10.9	12.3	13.7	14.6
	19	12.8	12.8	13.0	13.1	12.8	12.4	12.0	11.9	12.6	13.0	14.2	15.1
	20	11.9	11.8	11.8	12.0	11.8	11.6	11.3	11.4	11.7	12.7	14.6	14.7
	21	12.5	11.8	11.7	11.1	11.0	10.9	10.5	10.2	10.3	11.1	13.2	14.7
	22	12.1	11.5	10.5	10.1	9.9	9.9	9.2	9.2	9.6	10.5	12.8	14.8
	23	11.9	11.5	10.7	10.0	9.7	9.5	8.9	9.0	9.7	10.8	12.2	13.5
	24	10.8	10.5	9.9	9.6	9.6	9.4	9.4	9.7	10.4	11.3	12.1	12.7
	25	11.8	11.5	10.9	10.4	10.1	10.1	10.2	10.1	10.2	10.7	11.6	12.8
	26	9.8	9.6	9.6	9.4	9.1	8.5	7.7	7.8	8.1	8.5	9.0	9.5
	27	8.1	7.8	7.9	7.8	7.8	7.8	7.8	7.7	7.6	7.7	7.8	7.9
	28	6.7	6.4	5.9	5.7	5.5	5.0	5.1	5.0	5.1	5.6	6.8	6.6
	29	1.5	1.4	1.3	1.2	1.0	0.7	0.4	0.2	0.4	1.2	1.8	2.9
	30	-1.8	-2.2	-2.7	-2.5	-2.7	-2.8	-3.0	-2.8	-1.8	-0.6	1.7	2.4
	====	=====	=====	=====	=====	=====	=====	=====	=====	=====	=====	=====	=====
	SRED	6.8	6.6	6.3	6.2	6.0	5.8	5.8	5.9	6.3	7.2	8.1	9.0
	----	-----	-----	-----	-----	-----	-----	-----	-----	-----	-----	-----	-----
	STD	4.2	4.1	4.1	4.1	4.1	4.2	4.1	4.0	4.0	4.1	4.2	4.3
	----	-----	-----	-----	-----	-----	-----	-----	-----	-----	-----	-----	-----
	MAKS	14.7	13.7	13.8	14.0	13.9	14.1	13.9	13.9	13.9	14.7	15.6	15.9
	----	-----	-----	-----	-----	-----	-----	-----	-----	-----	-----	-----	-----
	MIN	-1.8	-2.2	-2.7	-2.5	-2.7	-2.8	-3.0	-2.8	-1.8	-0.6	1.7	2.4
	----	-----	-----	-----	-----	-----	-----	-----	-----	-----	-----	-----	-----
	N.P.	0	0	0	0	0	0	0	0	0	0	0	0
	====	=====	=====	=====	=====	=====	=====	=====	=====	=====	=====	=====	=====
DHMZ RH Sluzba za opcu meteorologiju POSTAJA ZAGREB GRIC (236)
ODJEL ZA OBRADU I KONTROLU PODATAKA I KLIMATSKE PODLOGE MJESEC STUDENI 11
SATNE VRIJEDNOSTI TEMPERATURE ZRAKA (ST.C) ( LIST 2 ) GODINA 2016
SIRINA 45 49 N
IZVOR Termograf IZRADA BROJ VISINA m DULJINA 15 59 E
VISINA 157 m
	----	-----	-----	-----	-----	-----	-----	-----	-----	-----	-----	-----	-----	-----	-----	-----	-----	-----	-----	-----	-----	----
	*SAT
	*	13	14	15	16	17	18	19	20	21	22	23	24	SRED-	STAN.	MAKS.	MIN.	AMPL.	MAKS.	MIN.	AMPL.	BR.
	DAN*													NJAK	DEV.	1*	1*	2*	3*	3*	4*	N.P.
	----	-----	-----	-----	-----	-----	-----	-----	-----	-----	-----	-----	-----	-----	-----	-----	-----	-----	-----	-----	-----	----
	1	11.8	13.4	13.8	13.6	13.1	11.3	10.2	9.9	9.8	8.5	7.8	7.4	8.0	3.6	13.8	3.0	10.8	13.8	2.9	10.9	0
	2	15.8	15.7	15.3	14.9	14.4	14.2	13.3	13.1	13.0	12.8	9.7	8.9	11.8	3.1	15.9	6.9	9.0	15.9	6.9	9.0	0
	3	9.2	9.2	9.8	9.3	8.6	7.2	6.5	6.1	6.0	5.9	5.9	5.1	7.4	1.2	9.8	5.1	4.7	9.8	5.1	4.7	0
	4	4.4	5.0	6.0	5.5	5.0	4.0	3.8	3.7	3.5	3.8	3.9	3.3	3.6	1.2	6.0	0.8	5.2	6.0	0.8	5.2	0
	5	10.0	11.0	11.8	11.6	12.6	13.5	14.5	14.5	14.6	14.6	13.9	15.1	8.8	4.6	15.1	2.9	12.2	15.4	2.7	12.7	0
	6	14.9	15.7	15.9	16.6	16.8	16.7	14.5	12.9	12.6	12.3	10.0	7.7	14.0	2.0	16.8	7.7	9.1	16.9	7.7	9.2	0
	7	9.4	9.6	9.7	8.9	8.6	7.9	8.1	8.0	7.8	7.6	7.4	7.3	7.5	1.2	9.7	5.9	3.8	9.8	5.9	3.9	0
	8	3.7	3.7	3.6	4.0	3.9	3.9	4.0	3.9	4.0	3.8	3.9	4.1	4.5	1.0	7.1	3.6	3.5	7.3	3.6	3.7	0
	9	7.3	7.5	8.1	8.1	6.9	5.9	4.9	4.8	4.5	4.4	4.3	4.3	5.3	1.4	8.1	4.0	4.1	8.5	3.9	4.6	0
	10	9.6	10.3	10.3	10.1	9.2	8.3	7.6	7.8	7.6	6.8	5.8	5.1	6.6	2.2	10.3	3.7	6.6	10.6	3.7	6.9	0
	11	7.1	7.6	7.4	7.7	7.9	7.8	7.8	7.6	6.8	5.2	4.9	5.3	5.7	1.7	7.9	3.6	4.3	7.9	3.4	4.5	0
	12	3.6	3.9	4.8	4.9	5.1	5.0	4.9	4.5	3.9	3.8	3.3	3.0	4.6	1.0	6.4	3.0	3.4	6.4	3.0	3.4	0
	13	5.2	5.2	4.3	4.1	3.5	3.4	3.2	2.7	2.3	2.2	2.4	2.3	3.1	0.9	5.2	2.0	3.2	5.3	2.0	3.3	0
	14	4.2	4.8	4.6	3.8	3.2	2.2	2.0	2.0	1.8	1.5	1.1	1.0	2.1	1.4	4.8	0.1	4.7	4.8	0.0	4.8	0
	15	5.1	5.2	5.0	4.5	3.4	2.8	2.0	1.7	1.2	0.7	0.6	0.5	1.9	1.8	5.2	-0.3	5.5	5.2	-0.3	5.5	0
	16	5.6	5.7	5.8	5.8	5.7	5.5	5.0	4.8	4.5	4.5	4.6	4.7	3.5	2.0	5.8	0.4	5.4	5.8	0.4	5.4	0
	17	11.9	13.5	13.7	12.9	12.5	11.6	10.9	10.6	10.6	9.6	8.7	8.5	8.5	3.4	13.7	3.9	9.8	13.7	3.9	9.8	0
	18	15.1	15.4	14.7	14.6	14.5	14.5	14.5	14.1	14.0	13.6	13.6	13.4	12.3	2.5	15.4	8.2	7.2	15.4	8.2	7.2	0
	19	16.7	18.5	18.6	18.5	17.6	14.8	12.5	12.3	12.1	12.9	12.9	12.4	14.0	2.2	18.6	11.9	6.7	18.7	11.9	6.8	0
	20	15.6	15.5	15.4	14.9	14.6	14.3	14.0	14.1	14.2	13.9	13.6	13.2	13.4	1.4	15.6	11.3	4.3	15.7	11.2	4.5	0
	21	15.3	16.2	16.7	16.7	16.1	15.5	15.0	14.5	14.2	13.6	13.3	12.3	13.3	2.1	16.7	10.2	6.5	16.9	10.2	6.7	0
	22	16.1	17.0	17.7	17.6	16.6	15.9	15.2	14.4	13.6	13.6	13.1	12.7	13.1	2.8	17.7	9.2	8.5	17.7	9.2	8.5	0
	23	14.9	15.8	16.5	16.1	15.5	14.7	14.6	14.4	14.2	12.8	12.1	11.8	12.5	2.4	16.5	8.9	7.6	16.5	8.9	7.6	0
	24	13.9	14.2	15.0	15.1	14.5	13.8	14.0	14.1	14.0	13.4	12.8	12.5	12.2	2.0	15.1	9.4	5.7	15.1	9.4	5.7	0
	25	13.3	13.4	12.9	12.6	12.2	11.8	11.5	10.8	10.2	10.3	10.2	9.9	11.2	1.1	13.4	9.9	3.5	13.5	9.9	3.6	0
	26	9.0	9.2	8.7	8.7	8.6	8.6	8.6	8.6	8.5	8.5	8.2	8.0	8.7	0.6	9.8	7.7	2.1	9.9	7.6	2.3	0
	27	8.1	8.3	8.6	8.7	8.6	8.4	8.2	8.2	8.0	8.2	8.0	7.2	8.0	0.3	8.7	7.2	1.5	8.7	7.2	1.5	0
	28	6.1	5.9	5.9	5.0	4.1	3.4	2.7	2.2	2.1	2.2	2.0	1.7	4.7	1.7	6.8	1.7	5.1	7.2	1.7	5.5	0
	29	3.3	3.3	3.4	3.1	2.5	1.4	0.7	0.2	-0.2	-1.0	-1.4	-1.5	1.2	1.4	3.4	-1.5	4.9	3.4	-1.5	4.9	0
	30	3.2	4.7	4.8	4.6	4.0	3.3	2.9	2.8	2.7	2.2	2.0	1.2	0.8	2.8	4.8	-3.0	7.8	4.8	-3.0	7.8	0
	====	=====	=====	=====	=====	=====	=====	=====	=====	=====	=====	=====	=====	=====	=====	=====	=====	=====	=====	=====	=====	====
	SRED	9.6	10.1	10.3	10.1	9.7	9.1	8.6	8.3	8.1	7.7	7.3	6.9	7.7	1.9	10.8	4.9	5.9	10.9	4.9	6.0
	----	-----	-----	-----	-----	-----	-----	-----	-----	-----	-----	-----	-----	-----	-----	-----	-----	-----	-----	-----	-----	----
	STD	4.5	4.7	4.8	4.8	4.9	4.8	4.7	4.7	4.7	4.7	4.5	4.5
	----	-----	-----	-----	-----	-----	-----	-----	-----	-----	-----	-----	-----	-----	-----	-----	-----	-----	-----	-----	-----	----
	MAKS	16.7	18.5	18.6	18.5	17.6	16.7	15.2	14.5	14.6	14.6	13.9	15.1
	----	-----	-----	-----	-----	-----	-----	-----	-----	-----	-----	-----	-----	-----	-----	-----	-----	-----	-----	-----	-----	----
	MIN	3.2	3.3	3.4	3.1	2.5	1.4	0.7	0.2	-0.2	-1.0	-1.4	-1.5
	----	-----	-----	-----	-----	-----	-----	-----	-----	-----	-----	-----	-----	-----	-----	-----	-----	-----	-----	-----	-----	----
	N.P.	0	0	0	0	0	0	0	0	0	0	0	0									0
	====	=====	=====	=====	=====	=====	=====	=====	=====	=====	=====	=====	=====	=====	=====	=====	=====	=====	=====	=====	=====	====
1* IZ SATNIH VRIJEDNOSTI 1-24, 2* IZ SATNIH EKSTREMA, 3* PO DIJAGRAMU, 4* IZ EKSTREMA PO DIJAGRAMU
N.P. - BROJ NEDOSTAJUCIH PODATAKA
DHMZ RH Sluzba za opcu meteorologiju POSTAJA ZAGREB GRIC (236)
ODJEL ZA OBRADU I KONTROLU PODATAKA I KLIMATSKE PODLOGE MJESEC PROSINAC 12
SATNE VRIJEDNOSTI TEMPERATURE ZRAKA (ST.C) ( LIST 1 ) GODINA 2016
SIRINA 45 49 N
IZVOR Termograf IZRADA BROJ VISINA m DULJINA 15 59 E
VISINA 157 m
	----	-----	-----	-----	-----	-----	-----	-----	-----	-----	-----	-----	-----
	*SAT
	*	1	2	3	4	5	6	7	8	9	10	11	12
	DAN*
	----	-----	-----	-----	-----	-----	-----	-----	-----	-----	-----	-----	-----
	1	1.1	0.9	0.7	0.5	0.0	-0.2	-0.4	0.0	0.7	2.1	3.0	4.8
	2	-0.1	-0.4	-0.1	-0.1	-0.3	-0.4	-0.8	-0.4	0.6	1.0	3.3	5.0
	3	3.8	4.2	4.0	3.8	3.7	2.7	2.5	2.6	3.3	3.9	4.8	5.6
	4	2.4	2.2	2.0	1.6	0.4	0.1	0.4	0.1	0.6	1.7	2.9	4.0
	5	2.9	2.8	2.6	2.5	2.4	2.5	2.7	2.6	2.8	2.9	3.1	3.6
	6	0.0	-0.2	-0.4	-0.9	-1.0	-1.0	-1.4	-1.7	-1.2	0.1	1.4	3.1
	7	-1.9	-1.9	-1.9	-1.9	-1.9	-1.9	-1.7	-1.7	-1.5	0.0	1.1	2.4
	8	-2.0	-1.9	-1.9	-2.1	-2.1	-2.1	-2.1	-2.0	-2.3	-2.4	-2.1	-1.9
	9	-3.6	-3.6	-3.7	-3.4	-3.1	-3.0	-3.0	-3.0	-2.8	-1.8	-1.4	0.0
	10	-2.5	-2.6	-2.8	-2.4	-2.5	-2.6	-2.5	-2.9	-2.6	-2.0	-1.5	0.0
	11	-1.2	-1.6	-1.4	-1.9	-2.2	-2.5	-2.7	-2.7	-2.5	-1.6	0.4	3.4
	12	3.8	3.8	4.1	4.4	3.9	3.4	3.8	4.0	4.9	5.6	8.1	9.0
	13	5.3	4.8	4.4	4.2	4.0	2.9	1.9	1.5	1.5	1.8	1.9	2.6
	14	0.0	-0.3	-0.8	-1.0	-1.6	-1.8	-1.9	-1.4	-0.4	0.4	0.9	1.5
	15	3.2	3.6	3.4	2.7	2.6	3.1	3.6	3.9	4.1	4.3	4.7	4.4
	16	3.4	3.2	2.9	2.9	2.9	3.0	3.1	3.1	3.1	3.1	3.5	3.9
	17	0.1	-0.1	-0.3	-0.3	-0.9	-1.6	-2.4	-2.5	-2.4	-2.0	-0.7	-0.2
	18	-2.3	-2.4	-2.6	-3.3	-3.7	-3.4	-3.8	-3.9	-3.7	-3.0	-2.5	-2.4
	19	-3.5	-3.6	-3.5	-3.6	-3.8	-3.6	-3.0	-1.5	-1.5	-1.2	-0.7	-1.0
	20	-2.4	-2.4	-2.5	-2.6	-3.0	-3.0	-3.0	-2.9	-3.1	-2.9	-2.7	-2.8
	21	-3.1	-3.0	-3.1	-3.1	-2.9	-2.8	-2.6	-2.6	-2.5	-2.3	-2.4	-2.2
	22	-2.4	-2.4	-2.4	-2.3	-2.4	-2.6	-2.5	-2.3	-2.1	-1.8	-1.7	-1.6
	23	-2.8	-2.8	-2.9	-3.0	-3.2	-3.1	-3.4	-3.6	-3.2	-3.1	-2.8	-2.6
	24	-1.8	-1.9	-2.0	-2.1	-2.4	-2.7	-2.3	-2.0	-2.2	-2.4	-2.2	-1.9
	25	-1.9	-1.7	-1.8	-2.0	-2.5	-2.6	-2.7	-2.2	-2.0	-1.4	-1.1	-0.1
	26	0.6	0.4	0.2	0.0	-0.4	-0.7	-1.0	-1.1	-0.3	0.8	1.3	3.2
	27	3.7	3.6	3.7	4.3	4.0	4.9	4.6	6.1	6.0	5.3	5.6	7.3
	28	0.0	0.8	0.6	0.1	0.6	0.4	0.4	0.0	0.3	3.0	3.7	3.6
	29	2.0	1.8	1.5	1.2	1.4	1.0	1.1	1.4	2.0	2.7	3.0	3.7
	30	0.4	0.2	0	-0.2	-0.5	-1.2	-2.2	-2.4	-2.1	-1.3	-0.1	1.8	2.5	2.5	2.5	2.1	1	0	-0.4	-0.8	-1.1	-1.7	-2.3	-3.1	-3.2	-3.5	-3.8	-4	-4.3	-4.8	-4.9	-5	-4.7	-3.4	-2.1	-0.7	0.9	1.8	2.1	2.1	1.5	0.4	-0.1	-0.9	-1.4	-1.9	-2.2	-2.4
	31
	====	=====	=====	=====	=====	=====	=====	=====	=====	=====	=====	=====	=====
	SRED	-0.1	-0.1	-0.3	-0.4	-0.6	-0.8	-0.8	-0.7	-0.4	0.2	0.9	1.8
	----	-----	-----	-----	-----	-----	-----	-----	-----	-----	-----	-----	-----
	STD	2.6	2.6	2.5	2.5	2.5	2.5	2.5	2.6	2.7	2.6	2.8	3.1
	----	-----	-----	-----	-----	-----	-----	-----	-----	-----	-----	-----	-----
	MAKS	5.3	4.8	4.4	4.4	4.0	4.9	4.6	6.1	6.0	5.6	8.1	9.0
	----	-----	-----	-----	-----	-----	-----	-----	-----	-----	-----	-----	-----
	MIN	-3.6	-3.6	-3.8	-4.0	-4.3	-4.8	-4.9	-5.0	-4.7	-3.4	-2.8	-2.8
	----	-----	-----	-----	-----	-----	-----	-----	-----	-----	-----	-----	-----
	N.P.	0	0	0	0	0	0	0	0	0	0	0	0
	====	=====	=====	=====	=====	=====	=====	=====	=====	=====	=====	=====	=====
DHMZ RH Sluzba za opcu meteorologiju POSTAJA ZAGREB GRIC (236)
ODJEL ZA OBRADU I KONTROLU PODATAKA I KLIMATSKE PODLOGE MJESEC PROSINAC 12
SATNE VRIJEDNOSTI TEMPERATURE ZRAKA (ST.C) ( LIST 2 ) GODINA 2016
SIRINA 45 49 N
IZVOR Termograf IZRADA BROJ VISINA m DULJINA 15 59 E
VISINA 157 m
	----	-----	-----	-----	-----	-----	-----	-----	-----	-----	-----	-----	-----	-----	-----	-----	-----	-----	-----	-----	-----	----
	*SAT
	*	13	14	15	16	17	18	19	20	21	22	23	24	SRED-	STAN.	MAKS.	MIN.	AMPL.	MAKS.	MIN.	AMPL.	BR.
	DAN*													NJAK	DEV.	1*	1*	2*	3*	3*	4*	N.P.
	----	-----	-----	-----	-----	-----	-----	-----	-----	-----	-----	-----	-----	-----	-----	-----	-----	-----	-----	-----	-----	----
	1	5.7	6.5	6.9	6.4	5.3	4.1	3.2	2.8	2.4	0.8	0.5	-0.1	2.4	2.4	6.9	-0.4	7.3	6.9	-0.4	7.3	0
	2	8.8	9.7	9.5	7.7	6.3	5.5	4.9	4.5	3.7	3.2	3.1	3.4	3.2	3.3	9.7	-0.8	10.5	10.0	-1.0	11.0	0
	3	5.8	6.0	6.1	5.8	4.9	3.8	3.0	2.5	2.5	2.5	2.5	2.7	3.9	1.2	6.1	2.5	3.6	6.4	2.5	3.9	0
	4	5.2	5.5	6.2	5.2	4.9	4.2	4.1	3.7	3.6	3.6	3.5	3.0	3.0	1.8	6.2	0.1	6.1	6.2	0.0	6.2	0
	5	3.9	4.4	4.3	4.1	3.6	3.0	2.3	1.9	1.2	0.9	0.6	0.3	2.7	1.1	4.4	0.3	4.1	4.6	0.3	4.3	0
	6	4.2	5.2	5.9	5.8	4.9	3.4	2.3	1.8	0.1	-0.5	-1.2	-1.6	1.1	2.5	5.9	-1.7	7.6	6.0	-1.8	7.8	0
	7	3.1	3.2	2.9	1.7	-0.2	-0.9	-1.3	-1.5	-1.7	-1.7	-2.0	-2.1	-0.6	1.8	3.2	-2.1	5.3	3.4	-2.1	5.5	0
	8	-1.8	-1.5	-1.3	-1.7	-1.8	-2.1	-2.1	-2.4	-2.6	-2.1	-2.2	-2.7	-2.1	0.3	-1.3	-2.7	1.4	-1.3	-2.7	1.4	0
	9	1.2	1.9	1.2	0.4	-0.1	-0.7	-1.0	-1.1	-0.9	-1.1	-1.3	-2.1	-1.5	1.6	1.9	-3.7	5.6	2.1	-3.8	5.9	0
	10	2.2	3.8	4.0	3.8	2.7	1.8	1.0	0.9	0.6	-0.2	-0.4	-1.0	-0.3	2.3	4.0	-2.9	6.9	4.1	-3.0	7.1	0
	11	10.4	11.3	11.8	11.4	10.6	10.0	9.6	7.7	6.4	5.5	4.6	4.4	3.6	5.5	11.8	-2.7	14.5	11.8	-2.8	14.6	0
	12	9.1	10.0	10.2	10.0	9.5	9.7	8.9	8.4	8.0	7.9	7.6	6.4	6.9	2.4	10.2	3.4	6.8	10.3	3.4	6.9	0
	13	2.9	3.5	3.9	3.7	3.0	2.1	2.0	1.8	1.7	1.4	1.1	0.3	2.7	1.3	5.3	0.3	5.0	6.4	0.3	6.1	0
	14	3.8	4.6	5.1	5.1	4.1	3.3	2.6	2.7	2.8	3.0	3.1	3.3	1.5	2.3	5.1	-1.9	7.0	5.1	-1.9	7.0	0
	15	4.6	4.6	4.6	4.6	4.3	4.3	4.1	4.5	4.2	4.3	4.1	3.8	4.0	0.6	4.7	2.6	2.1	4.7	2.5	2.2	0
	16	4.2	4.1	4.4	4.1	3.8	3.8	3.5	3.3	3.0	2.4	1.7	0.7	3.2	0.8	4.4	0.7	3.7	4.5	0.7	3.8	0
	17	0.5	1.0	1.3	0.2	-0.4	-1.0	-1.2	-1.4	-1.9	-2.0	-1.6	-2.0	-0.9	1.1	1.3	-2.5	3.8	1.4	-2.6	4.0	0
	18	-1.5	-0.3	-0.1	-0.5	-1.2	-1.7	-2.1	-2.7	-2.8	-3.0	-3.1	-3.1	-2.5	1.1	-0.1	-3.9	3.8	0.0	-3.9	3.9	0
	19	-1.0	-1.0	-0.8	-1.0	-0.8	-0.9	-1.0	-1.1	-1.4	-1.5	-1.7	-2.1	-1.9	1.1	-0.7	-3.8	3.1	-0.5	-3.8	3.3	0
	20	-2.8	-2.7	-2.6	-2.7	-2.7	-2.8	-2.9	-3.0	-3.0	-3.0	-3.1	-3.0	-2.8	0.2	-2.4	-3.1	0.7	-2.1	-3.3	1.2	0
	21	-2.2	-2.1	-1.9	-2.0	-2.3	-2.2	-2.3	-2.3	-2.3	-2.3	-2.5	-2.4	-2.5	0.3	-1.9	-3.1	1.2	-1.9	-3.2	1.3	0
	22	-1.5	-1.5	-1.4	-1.6	-1.7	-1.8	-1.8	-1.8	-2.0	-2.4	-2.7	-2.8	-2.1	0.4	-1.4	-2.8	1.4	-1.3	-2.8	1.5	0
	23	-2.2	-2.2	-1.7	-1.7	-2.3	-2.4	-2.6	-2.6	-2.8	-2.9	-2.6	-2.1	-2.7	0.5	-1.7	-3.6	1.9	-1.7	-3.6	1.9	0
	24	-1.8	-1.4	-0.7	-1.0	-1.5	-1.7	-1.5	-1.7	-2.0	-1.8	-1.7	-1.7	-1.9	0.4	-0.7	-2.7	2.0	-0.7	-2.7	2.0	0
	25	0.3	0.5	0.4	0.3	0.2	-0.2	0.0	0.1	0.1	0.3	0.4	0.5	-0.8	1.2	0.5	-2.7	3.2	0.5	-2.7	3.2	0
	26	5.2	6.5	7.2	7.0	6.2	5.4	5.0	4.0	3.2	3.6	3.0	2.9	2.6	2.7	7.2	-1.1	8.3	7.2	-1.1	8.3	0
	27	8.2	8.8	9.1	8.6	7.3	5.9	5.3	4.6	2.8	3.6	4.7	1.6	5.4	1.9	9.1	1.6	7.5	9.1	1.6	7.5	0
	28	3.6	3.7	3.0	3.0	3.1	2.9	2.1	2.9	3.8	3.7	3.2	2.7	2.1	1.4	3.8	0.0	3.8	3.8	0.0	3.8	0
	29	3.9	3.9	3.8	3.4	2.7	1.6	1.2	1.0	1.0	1.0	0.6	0.1	2.0	1.1	3.9	0.1	3.8	4.0	0.1	3.9	0
	30													-0.3	1.6	2.5	-3.1	5.6	2.7	-3.1	5.8	0
	31													-1.9	2.3	2.1	-5.0	7.1	2.2	-5.1	7.3	0
	====	=====	=====	=====	=====	=====	=====	=====	=====	=====	=====	=====	=====	=====	=====	=====	=====	=====	=====	=====	=====	====
	SRED	2.8	3.2	3.4	3.0	2.4	1.8	1.4	1.2	0.8	0.6	0.4	0.1	0.8	1.6	3.5	-1.4	5.0	3.7	-1.5	5.2
	----	-----	-----	-----	-----	-----	-----	-----	-----	-----	-----	-----	-----	-----	-----	-----	-----	-----	-----	-----	-----	----
	STD	3.6	3.7	3.8	3.7	3.5	3.4	3.2	3.0	2.9	2.8	2.8	2.6
	----	-----	-----	-----	-----	-----	-----	-----	-----	-----	-----	-----	-----	-----	-----	-----	-----	-----	-----	-----	-----	----
	MAKS	10.4	11.3	11.8	11.4	10.6	10.0	9.6	8.4	8.0	7.9	7.6	6.4
	----	-----	-----	-----	-----	-----	-----	-----	-----	-----	-----	-----	-----	-----	-----	-----	-----	-----	-----	-----	-----	----
	MIN	-2.8	-2.7	-2.6	-2.7	-2.7	-2.8	-2.9	-3.0	-3.0	-3.0	-3.1	-3.1
	----	-----	-----	-----	-----	-----	-----	-----	-----	-----	-----	-----	-----	-----	-----	-----	-----	-----	-----	-----	-----	----
	N.P.	0	0	0	0	0	0	0	0	0	0	0	0									0
	====	=====	=====	=====	=====	=====	=====	=====	=====	=====	=====	=====	=====	=====	=====	=====	=====	=====	=====	=====	=====	====
1* IZ SATNIH VRIJEDNOSTI 1-24, 2* IZ SATNIH EKSTREMA, 3* PO DIJAGRAMU, 4* IZ EKSTREMA PO DIJAGRAMU
N.P. - BROJ NEDOSTAJUCIH PODATAKA
DHMZ RH Sluzba za opcu meteorologiju POSTAJA ZAGREB GRIC (236)
ODJEL ZA OBRADU I KONTROLU PODATAKA I KLIMATSKE PODLOGE MJESEC SIJECANJ 1
SATNE VRIJEDNOSTI TEMPERATURE ZRAKA (ST.C) ( LIST 1 ) GODINA 2017
SIRINA 45 49 N
IZVOR Termograf IZRADA BROJ VISINA m DULJINA 15 59 E
VISINA 157 m
	----	-----	-----	-----	-----	-----	-----	-----	-----	-----	-----	-----	-----
	*SAT
	*	1	2	3	4	5	6	7	8	9	10	11	12
	DAN*
	----	-----	-----	-----	-----	-----	-----	-----	-----	-----	-----	-----	-----
	1	-3.3	-3.6	-4	-4.5	-5.1	-5.5	-5.5	-6.1	-6	-4	-1.9	0.1	1.8	2.8	3.6	3.6	2.5	1.9	0.9	0.9	1	0.4	-0.5	-1.3	-1.6	-2.4	-2.9	-3.2	-3.1	-3.6	-3.7	-3.7	-2.8	-0.9	0.6	4.6	7.6	9	10.3	9.8	8.6	7.3	5.9	4.9	3.8	2.4	3.1	1.1
	2
	3
	4
	5	0.8	0.4	-0.2	-0.4	-1.3	-1.2	-1.7	-2	-2.2	-0.3	0.1	1.9	2.8	2.4	1.4	0.5	0.1	-0.8	-1.6	-1.8	-2	-2.2	-2.5	-2.8	-3.2	-3.7	-4.1	-4.3	-4.5	-4.6	-4.7	-4.7	-4.6	-4.1	-3.8	-3.6	-3.1	-3.6	-3.5	-3.6	-3.8	-4.4	-4.8	-5.1	-5.6	-5.7	-5.9	-6.1
	6
	7
	8	-7.8	-7.6	-7.6	-7.2	-7.0	-7.7	-8.4	-8.0	-7.2	-7.0	-6.3	-5.8
	9	-4.8	-5.4	-5.3	-5.2	-4.9	-4.9	-4.9	-5	-3.9	-3.5	-3.1	-3	-2.5	-2.5	-2.4	-2.3	-2.2	-2.1	-2.3	-2.2	-2.4	-2.7	-3	-3.5	-4	-4.8	-5.1	-5.8	-5.8	-5.9	-6.1	-6.6	-6.5	-6.5	-5.7	-5.5	-5.3	-5.4	-5.2	-5.7	-6.8	-7.9	-8.6	-8.7	-8.8	-9.2	-9.3	-9.7
	10
	11
	12
	13
	14
	15
	16
	17
	18	-0.8	-1.0	-1.1	-1.3	-1.2	-1.4	-1.4	-1.3	-1.2	-0.8	-0.7	-0.5
	19	-1.3	-1.3	-1.5	-1.5	-1.8	-1.8	-1.7	-1.9	-1.8	-1.1	-1.0	0.0
	20	-3.6	-4.5	-4.7	-4.8	-5.0	-5.3	-5.6	-5.5	-4.7	-3.2	-2.6	-1.3
	21	-4.0	-4.6	-5.5	-5.6	-5.9	-6.4	-6.4	-6.3	-5.8	-4.9	-5.8	-4.3
	22	-2.4	-2.4	-2.4	-2.4	-2.4	-2.5	-2.8	-2.8	-2.9	-2.6	-1.5	-0.8
	23	-4.8	-5.3	-5.6	-6.0	-6.2	-7.0	-7.1	-7.2	-7.2	-6.9	-6.1	-5.4
	24	-4.8	-4.8	-4.8	-4.9	-4.9	-4.8	-4.7	-4.8	-4.8	-4.7	-4.6	-4.6
	25	-4.5	-4.2	-4.1	-4.0	-3.9	-4.0	-3.9	-3.5	-3.5	-3.0	-2.7	-1.9
	26	-1.5	-1.5	-1.5	-1.5	-1.7	-2.0	-2.0	-1.9	-2.0	-1.7	-1.1	-0.2
	27	-1.2	-1.6	-2.5	-3.0	-3.2	-3.4	-3.4	-4.2	-4.9	-4.9	-3.7	-2.1
	28	-4.3	-4.8	-5.0	-5.8	-6.1	-6.7	-7.2	-7.3	-7.3	-7.0	-7.0	-6.2
	29	-6.5	-6.6	-6.3	-6.4	-6.3	-6.4	-6.3	-6.2	-6.1	-6.0	-5.9	-5.6
	30	-5.7	-5.7	-5.8	-6.1	-6.2	-6.2	-6.2	-6.4	-6.6	-6.6	-6.5	-6.4
	31	-6.9	-6.8	-6.8	-6.8	-6.8	-6.8	-6.0	-5.9	-5.6	-4.8	-4.4	-3.5
	====	=====	=====	=====	=====	=====	=====	=====	=====	=====	=====	=====	=====
	SRED	-3.2	-3.4	-3.6	-3.7	-3.8	-3.8	-3.8	-3.9	-3.7	-3.0	-2.5	-1.5
	----	-----	-----	-----	-----	-----	-----	-----	-----	-----	-----	-----	-----
	STD	2.9	2.9	2.9	2.9	3.0	3.2	3.2	3.3	3.3	3.3	3.3	3.7
	----	-----	-----	-----	-----	-----	-----	-----	-----	-----	-----	-----	-----
	MAKS	3.6	3.5	4.3	5.1	5.9	6.0	5.4	5.1	5.9	7.3	6.8	8.0
	----	-----	-----	-----	-----	-----	-----	-----	-----	-----	-----	-----	-----
	MIN	-9.9	-10.0	-10.0	-10.0	-9.3	-9.2	-9.4	-10.1	-9.3	-8.5	-7.8	-6.4
	----	-----	-----	-----	-----	-----	-----	-----	-----	-----	-----	-----	-----
	N.P.	0	0	0	0	0	0	0	0	0	0	0	0
	====	=====	=====	=====	=====	=====	=====	=====	=====	=====	=====	=====	=====
DHMZ RH Sluzba za opcu meteorologiju POSTAJA ZAGREB GRIC (236)
ODJEL ZA OBRADU I KONTROLU PODATAKA I KLIMATSKE PODLOGE MJESEC SIJECANJ 1
SATNE VRIJEDNOSTI TEMPERATURE ZRAKA (ST.C) ( LIST 2 ) GODINA 2017
SIRINA 45 49 N
IZVOR Termograf IZRADA BROJ VISINA m DULJINA 15 59 E
VISINA 157 m
	----	-----	-----	-----	-----	-----	-----	-----	-----	-----	-----	-----	-----	-----	-----	-----	-----	-----	-----	-----	-----	----
	*SAT
	*	13	14	15	16	17	18	19	20	21	22	23	24	SRED-	STAN.	MAKS.	MIN.	AMPL.	MAKS.	MIN.	AMPL.	BR.
	DAN*													NJAK	DEV.	1*	1*	2*	3*	3*	4*	N.P.
	----	-----	-----	-----	-----	-----	-----	-----	-----	-----	-----	-----	-----	-----	-----	-----	-----	-----	-----	-----	-----	----
	1													-1.3	3.2	3.6	-6.1	9.7	3.6	-6.1	9.7	0
	2													2.1	4.8	10.3	-3.7	14.0	10.3	-3.7	14.0	0
	3													0.7	1.6	3.8	-2.1	5.9	3.9	-2.1	6.0	0
	4													-1.6	2.5	1.9	-5.2	7.1	2.0	-5.4	7.4	0
	5													-0.5	1.6	2.8	-2.8	5.6	2.8	-2.8	5.6	0
	6													-4.4	0.8	-3.1	-6.1	3.0	-2.8	-6.1	3.3	0
	7													-6.5	1.7	-3.3	-9.3	6.0	-3.1	-9.3	6.2	0
	8	-5.2	-4.9	-4.6	-4.8	-4.8	-4.6	-4.8	-5.1	-5.2	-5.2	-5.4	-4.9	-6.1	1.3	-4.6	-8.4	3.8	-4.6	-8.5	3.9	0
	9													-3.5	1.2	-2.1	-5.4	3.3	-2.1	-5.5	3.4	0
	10													-6.6	1.6	-4.0	-9.7	5.7	-3.4	-9.7	6.3	0
	11													-7.4	2.0	-4.5	-10.1	5.6	-4.5	-10.1	5.6	0
	12													1.2	3.9	5.2	-6.1	11.3	5.2	-6.5	11.7	0
	13													3.8	3.0	9.5	0.1	9.4	9.5	0.1	9.4	0
	14													1.8	1.1	3.6	0.4	3.2	3.7	0.4	3.3	0
	15													0.4	1.6	3.7	-1.7	5.4	3.7	-1.9	5.6	0
	16													-0.1	0.9	1.1	-1.6	2.7	1.3	-1.6	2.9	0
	17													-0.8	0.4	0.1	-1.7	1.8	0.2	-1.8	2.0	0
	18	-0.2	0.2	-0.2	-0.5	-0.8	-0.9	-0.9	-1.1	-1.2	-1.3	-1.5	-1.7	-1.0	0.4	0.2	-1.7	1.9	0.2	-1.7	1.9	0
	19	0.3	0.5	0.4	0.2	-0.9	-1.6	-1.8	-1.7	-1.7	-2.1	-2.4	-2.7	-1.3	0.9	0.5	-2.7	3.2	1.1	-2.7	3.8	0
	20	-0.5	0.2	0.3	0.1	-1.0	-1.7	-2.1	-2.6	-3.2	-3.4	-3.3	-3.6	-3.0	1.8	0.3	-5.6	5.9	0.3	-5.6	5.9	0
	21	-2.6	-2.3	-1.9	-2.1	-2.2	-2.4	-2.2	-2.5	-2.4	-2.2	-2.4	-2.5	-3.9	1.7	-1.9	-6.4	4.5	-1.9	-6.4	4.5	0
	22	0.0	0.1	0.1	-0.3	-1.0	-1.7	-2.3	-2.6	-3.0	-3.8	-4.0	-4.1	-2.1	1.2	0.1	-4.1	4.2	0.1	-4.1	4.2	0
	23	-4.8	-4.6	-4.0	-4.0	-4.2	-4.7	-4.8	-4.8	-4.9	-4.9	-4.9	-4.8	-5.4	1.0	-4.0	-7.2	3.2	-3.9	-7.2	3.3	0
	24	-4.7	-4.7	-4.6	-4.7	-5.3	-4.8	-4.7	-4.6	-4.5	-4.4	-4.4	-4.5	-4.7	0.2	-4.4	-5.3	0.9	-4.4	-5.3	0.9	0
	25	-1.6	-1.4	-1.6	-1.6	-1.5	-1.6	-1.7	-1.6	-1.6	-1.8	-1.6	-1.5	-2.6	1.1	-1.4	-4.5	3.1	-1.4	-4.5	3.1	0
	26	-0.1	0.4	0.5	0.4	0.1	-0.3	-0.5	-0.5	-0.6	-0.7	-0.9	-1.0	-0.9	0.8	0.5	-2.0	2.5	0.5	-2.0	2.5	0
	27	-1.1	-0.8	-0.3	-0.8	-1.3	-2.0	-2.7	-2.9	-3.4	-3.6	-3.7	-4.0	-2.7	1.3	-0.3	-4.9	4.6	-0.3	-5.0	4.7	0
	28	-5.6	-5.3	-4.7	-5.5	-7.1	-6.6	-6.8	-6.9	-6.8	-6.6	-6.5	-6.4	-6.2	0.9	-4.3	-7.3	3.0	-4.0	-7.3	3.3	0
	29	-5.3	-5.2	-5.0	-4.9	-4.9	-5.0	-5.5	-5.5	-5.6	-5.5	-5.5	-5.9	-5.8	0.5	-4.9	-6.6	1.7	-4.9	-6.6	1.7	0
	30	-6.1	-6.0	-6.2	-6.6	-6.7	-6.8	-6.9	-6.8	-6.9	-6.9	-6.9	-6.9	-6.4	0.4	-5.7	-6.9	1.2	-5.7	-6.9	1.2	0
	31	-2.3	-1.4	-1.4	-1.4	-1.4	-1.5	-0.8	-0.6	-0.4	0.3	0.4	0.4	-3.4	2.7	0.4	-6.9	7.3	0.4	-6.9	7.3	0
	====	=====	=====	=====	=====	=====	=====	=====	=====	=====	=====	=====	=====	=====	=====	=====	=====	=====	=====	=====	=====	====
	SRED	-0.7	-0.5	-0.6	-0.8	-1.3	-1.7	-2.0	-2.2	-2.4	-2.6	-2.7	-2.9	-2.5	1.6	0.0	-4.9	4.9	0.1	-4.9	5.0
	----	-----	-----	-----	-----	-----	-----	-----	-----	-----	-----	-----	-----	-----	-----	-----	-----	-----	-----	-----	-----	----
	STD	3.9	3.9	3.7	3.6	3.5	3.3	3.3	3.1	3.1	3.0	3.0	3.0
	----	-----	-----	-----	-----	-----	-----	-----	-----	-----	-----	-----	-----	-----	-----	-----	-----	-----	-----	-----	-----	----
	MAKS	9.5	9.0	10.3	9.8	8.6	7.3	5.9	4.9	3.8	3.1	3.3	3.8
	----	-----	-----	-----	-----	-----	-----	-----	-----	-----	-----	-----	-----	-----	-----	-----	-----	-----	-----	-----	-----	----
	MIN	-6.1	-6.0	-6.2	-6.6	-7.1	-7.9	-8.6	-8.7	-8.8	-9.2	-9.3	-9.7
	----	-----	-----	-----	-----	-----	-----	-----	-----	-----	-----	-----	-----	-----	-----	-----	-----	-----	-----	-----	-----	----
	N.P.	0	0	0	0	0	0	0	0	0	0	0	0									0
	====	=====	=====	=====	=====	=====	=====	=====	=====	=====	=====	=====	=====	=====	=====	=====	=====	=====	=====	=====	=====	====
1* IZ SATNIH VRIJEDNOSTI 1-24, 2* IZ SATNIH EKSTREMA, 3* PO DIJAGRAMU, 4* IZ EKSTREMA PO DIJAGRAMU
N.P. - BROJ NEDOSTAJUCIH PODATAKA
DHMZ RH Sluzba za opcu meteorologiju POSTAJA ZAGREB GRIC (236)
ODJEL ZA OBRADU I KONTROLU PODATAKA I KLIMATSKE PODLOGE MJESEC VELJACA 2
SATNE VRIJEDNOSTI TEMPERATURE ZRAKA (ST.C) ( LIST 1 ) GODINA 2017
SIRINA 45 49 N
IZVOR Termograf IZRADA BROJ VISINA m DULJINA 15 59 E
VISINA 157 m
	----	-----	-----	-----	-----	-----	-----	-----	-----	-----	-----	-----	-----
	*SAT
	*	1	2	3	4	5	6	7	8	9	10	11	12
	DAN*
	----	-----	-----	-----	-----	-----	-----	-----	-----	-----	-----	-----	-----
	1	0.4	1.0	1.2	1.3	1.3	1.8	2.2	2.2	2.6	2.9	3.4	3.9
	2	3.0	3.0	3.2	3.4	3.1	3.2	3.6	4.1	5.1	5.7	6.6	7.4
	3	9.5	9.1	9.0	9.1	9.2	9.2	9.2	9.7	9.9	10.1	10.3	11.2
	4	8.2	7.6	7.5	7.4	7.8	7.6	7.5	7.6	7.4	7.9	9.1	10.0
	5	7.9	7.2	6.7	6.6	6.7	6.6	6.4	5.7	5.7	7.5	8.2	9.6	10.8	11.0	11.5	11.2	11.0	9.7	8.8	8.5	8.0	7.9	7.9	8.3	8.4	8.3	8.1	8	7.9	7.6	7	7.1	6.8	7	7.1	6.9	6.1	6.9	6.3	6.2	6.1	5.3	5.4	5.2	5.1	5.0	4.6	4.5
	6
	7
	8
	9
	10
	11
	12
	13
	14
	15	0.6	0.1	-0.2	-0.8	-1.2	-1.5	-1.8	-1.6	-0.6	1.1	3.1	5.4
	16	2.8	2.2	1.8	1.7	0.8	0.9	0.2	0.9	1.9	3.9	5.6	8.1
	17	2.0	1.4	0.9	0.4	0.1	0.0	-0.1	0.0	0.3	2.0	3.7	5.7
	18	3.9	3.2	2.7	2.7	2.6	2.6	2.5	2.6	2.9	3.7	5.2	6.5
	19	6.0	5.7	5.6	5.4	5.1	4.2	3.8	3.6	4.4	5.2	6.8	8.4
	20	2.7	1.9	1.7	1.7	1.2	0.8	0.4	1.0	1.2	1.7	2.8	4.9
	21	5.2	4.4	4.1	4.1	4.3	4.7	5.4	6.1	8.5	10.2	10.8	10.5
	22	9.7	7.4	6.7	5.8	5.0	5.4	4.6	4.9	6.2	7.2	9.0	10.8
	23	9.2	9.0	9.1	9.0	8.0	8.0	8.3	9.3	10.5	12.6	14.4	15.3
	24	12.2	12.6	12.7	12.3	12.3	12.4	12.2	12.0	13.0	13.0	13.3	13.4
	25	4.0	3.4	3.4	3.0	2.9	3.0	3.0	3.0	4.0	5.8	7.1	7.9
	26	3.2	2.6	2.0	1.9	1.3	1.0	1.1	1.7	2.3	4.7	6.0	7.5
	27	5.7	5.9	5.7	5.0	4.6	4.7	4.7	5.1	6.0	7.8	10.2	12.0
	28	9.7	9.8	10.1	10.0	9.9	9.9	9.5	10.2	12.0	12.9	13.2	14.0
	====	=====	=====	=====	=====	=====	=====	=====	=====	=====	=====	=====	=====
	SRED	4.6	4.3	4.1	4.0	3.7	3.7	3.5	3.7	4.3	5.3	6.3	7.3
	----	-----	-----	-----	-----	-----	-----	-----	-----	-----	-----	-----	-----
	STD	3.4	3.3	3.4	3.4	3.4	3.5	3.5	3.5	3.7	3.8	3.8	3.8
	----	-----	-----	-----	-----	-----	-----	-----	-----	-----	-----	-----	-----
	MAKS	12.2	12.6	12.7	12.3	12.3	12.4	12.2	12.0	13.0	13.0	14.4	15.3
	----	-----	-----	-----	-----	-----	-----	-----	-----	-----	-----	-----	-----
	MIN	0.4	0.1	-0.2	-0.8	-1.2	-1.5	-1.8	-1.6	-0.6	0.4	0.9	1.0
	----	-----	-----	-----	-----	-----	-----	-----	-----	-----	-----	-----	-----
	N.P.	0	0	0	0	0	0	0	0	0	0	0	0
	====	=====	=====	=====	=====	=====	=====	=====	=====	=====	=====	=====	=====
DHMZ RH Sluzba za opcu meteorologiju POSTAJA ZAGREB GRIC (236)
ODJEL ZA OBRADU I KONTROLU PODATAKA I KLIMATSKE PODLOGE MJESEC VELJACA 2
SATNE VRIJEDNOSTI TEMPERATURE ZRAKA (ST.C) ( LIST 2 ) GODINA 2017
SIRINA 45 49 N
IZVOR Termograf IZRADA BROJ VISINA m DULJINA 15 59 E
VISINA 157 m
	----	-----	-----	-----	-----	-----	-----	-----	-----	-----	-----	-----	-----	-----	-----	-----	-----	-----	-----	-----	-----	----
	*SAT
	*	13	14	15	16	17	18	19	20	21	22	23	24	SRED-	STAN.	MAKS.	MIN.	AMPL.	MAKS.	MIN.	AMPL.	BR.
	DAN*													NJAK	DEV.	1*	1*	2*	3*	3*	4*	N.P.
	----	-----	-----	-----	-----	-----	-----	-----	-----	-----	-----	-----	-----	-----	-----	-----	-----	-----	-----	-----	-----	----
	1	4.3	4.3	4.4	4.2	4.2	4.1	3.8	3.5	3.3	3.0	2.9	2.8	2.9	1.2	4.4	0.4	4.0	4.5	0.4	4.1	0
	2	9.3	9.6	10.7	10.8	10.4	10.4	10.5	10.1	9.9	9.8	9.6	9.8	7.2	3.1	10.8	3.0	7.8	11.2	2.8	8.4	0
	3	12.2	12.7	13.1	12.9	12.4	11.7	10.9	10.0	9.5	8.7	8.5	8.4	10.3	1.5	13.1	8.4	4.7	13.2	8.2	5.0	0
	4	12.0	13.0	12.8	12.1	11.4	10.9	9.9	9.3	9.0	8.5	8.1	7.8	9.2	1.8	13.0	7.4	5.6	13.1	7.3	5.8	0
	5													8.3	1.8	11.5	5.7	5.8	11.5	5.7	5.8	0
	6													6.5	1.2	8.4	4.5	3.9	8.4	4.5	3.9	0
	7													4.3	0.4	4.9	3.5	1.4	4.9	3.5	1.4	0
	8													2.1	1.4	4.9	0.2	4.7	5.1	0.2	4.9	0
	9													0.6	0.4	1.4	0.2	1.2	1.4	0.2	1.2	0
	10													0.9	0.4	1.6	0.4	1.2	1.6	0.3	1.3	0
	11													2.3	1.1	3.8	0.7	3.1	3.8	0.7	3.1	0
	12													3.1	0.8	4.3	2.0	2.3	4.3	2.0	2.3	0
	13													2.1	0.8	4.0	1.2	2.8	4.0	1.2	2.8	0
	14													2.3	2.3	6.5	-0.8	7.3	6.5	-0.8	7.3	0
	15	7.3	8.6	9.8	10.0	9.8	8.8	6.9	5.6	5.7	5.3	4.5	3.2	3.7	4.1	10.0	-1.8	11.8	10.0	-1.9	11.9	0
	16	9.3	10.2	10.6	10.5	9.9	8.6	7.1	5.9	5.8	5.0	3.8	2.7	5.0	3.4	10.6	0.2	10.4	10.7	0.2	10.5	0
	17	8.4	10.5	11.6	12.3	12.1	9.6	7.6	6.8	5.9	5.2	4.7	4.3	4.8	4.2	12.3	-0.1	12.4	12.3	-0.1	12.4	0
	18	7.7	8.5	9.1	9.2	8.8	7.4	6.8	6.4	6.4	6.4	6.2	6.0	5.4	2.3	9.2	2.5	6.7	9.4	2.5	6.9	0
	19	8.8	9.0	9.6	9.3	8.9	7.9	6.7	5.7	4.9	4.6	3.8	3.1	6.1	2.0	9.6	3.1	6.5	9.9	3.1	6.8	0
	20	7.8	10.0	10.1	11.0	11.0	9.8	8.5	7.7	6.8	6.8	6.1	5.6	5.1	3.6	11.0	0.4	10.6	11.0	0.3	10.7	0
	21	10.5	10.4	10.2	10.5	10.3	10.4	10.2	10.0	9.5	9.5	9.2	9.9	8.3	2.5	10.8	4.1	6.7	10.8	4.0	6.8	0
	22	11.5	13.6	14.3	13.8	13.0	11.8	11.2	10.5	10.0	9.8	9.5	9.2	9.2	2.9	14.3	4.6	9.7	14.3	4.6	9.7	0
	23	15.0	15.1	15.0	14.5	14.1	13.0	12.8	12.6	12.4	12.1	12.7	12.3	11.8	2.5	15.3	8.0	7.3	15.4	8.0	7.4	0
	24	13.6	13.7	12.8	9.0	7.0	6.2	6.0	6.0	5.6	5.5	4.2	4.0	10.2	3.4	13.7	4.0	9.7	13.7	4.0	9.7	0
	25	9.1	9.8	10.0	9.9	9.8	8.3	7.0	6.2	6.0	5.3	5.2	5.0	5.9	2.5	10.0	2.9	7.1	10.1	2.8	7.3	0
	26	8.9	10.2	10.9	11.0	10.7	9.9	8.8	8.2	7.2	7.2	6.5	6.3	5.9	3.5	11.0	1.0	10.0	11.1	1.0	10.1	0
	27	14.2	15.3	16.0	15.2	14.2	12.8	12.1	11.5	11.0	10.1	10.1	9.5	9.6	3.8	16.0	4.6	11.4	16.1	4.6	11.5	0
	28	15.0	15.6	16.2	15.2	14.7	14.7	14.7	14.0	13.6	13.2	13.3	13.3	12.7	2.2	16.2	9.5	6.7	16.2	9.3	6.9	0
	====	=====	=====	=====	=====	=====	=====	=====	=====	=====	=====	=====	=====	=====	=====	=====	=====	=====	=====	=====	=====	====
	SRED	8.2	8.8	9.1	8.8	8.4	7.6	7.0	6.5	6.2	5.8	5.5	5.3	5.9	2.2	9.4	2.8	6.5	9.4	2.8	6.6
	----	-----	-----	-----	-----	-----	-----	-----	-----	-----	-----	-----	-----	-----	-----	-----	-----	-----	-----	-----	-----	----
	STD	3.9	4.2	4.3	4.1	4.1	3.8	3.7	3.5	3.5	3.4	3.5	3.6
	----	-----	-----	-----	-----	-----	-----	-----	-----	-----	-----	-----	-----	-----	-----	-----	-----	-----	-----	-----	-----	----
	MAKS	15.0	15.6	16.2	15.2	14.7	14.7	14.7	14.0	13.6	13.2	13.3	13.3
	----	-----	-----	-----	-----	-----	-----	-----	-----	-----	-----	-----	-----	-----	-----	-----	-----	-----	-----	-----	-----	----
	MIN	1.0	0.9	1.4	1.4	1.2	1.1	1.0	0.8	0.3	0.2	0.2	0.2
	----	-----	-----	-----	-----	-----	-----	-----	-----	-----	-----	-----	-----	-----	-----	-----	-----	-----	-----	-----	-----	----
	N.P.	0	0	0	0	0	0	0	0	0	0	0	0									0
	====	=====	=====	=====	=====	=====	=====	=====	=====	=====	=====	=====	=====	=====	=====	=====	=====	=====	=====	=====	=====	====
1* IZ SATNIH VRIJEDNOSTI 1-24, 2* IZ SATNIH EKSTREMA, 3* PO DIJAGRAMU, 4* IZ EKSTREMA PO DIJAGRAMU
N.P. - BROJ NEDOSTAJUCIH PODATAKA
DHMZ RH Sluzba za opcu meteorologiju POSTAJA ZAGREB GRIC (236)
ODJEL ZA OBRADU I KONTROLU PODATAKA I KLIMATSKE PODLOGE MJESEC OZUJAK 3
SATNE VRIJEDNOSTI TEMPERATURE ZRAKA (ST.C) ( LIST 1 ) GODINA 2017
SIRINA 45 49 N
IZVOR Termograf IZRADA BROJ VISINA m DULJINA 15 59 E
VISINA 157 m
	----	-----	-----	-----	-----	-----	-----	-----	-----	-----	-----	-----	-----
	*SAT
	*	1	2	3	4	5	6	7	8	9	10	11	12
	DAN*
	----	-----	-----	-----	-----	-----	-----	-----	-----	-----	-----	-----	-----
	1	13.4	12.8	12.6	12.0	10.6	5.8	4.8	4.7	4.7	4.1	4.2	5.3
	2	4.7	4.6	3.8	3.0	2.9	2.8	2.6	3.6	5.2	7.8	8.9	10.0
	3	8.3	9.5	9.5	9.1	8.9	8.8	8.6	8.6	8.9	9.9	10.5	11.3
	4	9.0	8.8	8.4	7.9	7.3	7.6	7.0	7.2	8.8	10.9	12.8	15.0
	5	11.0	10.5	10.3	10.5	10.7	10.4	10.1	9.9	10.4	10.4	10.5	10.5
	6	6.7	6.9	6.8	6.8	7.0	7.0	6.8	7.9	8.0	8.8	9.4	9.3
	7	7.0	7.0	7.0	7.0	7.1	7.3	7.7	8.0	7.4	7.9	8.9	9.8
	8	8.7	8.2	7.9	7.8	7.7	7.5	7.4	8.0	8.8	9.5	10.1	11.6
	9	8.6	7.8	7.3	7.2	6.7	6.4	5.7	6.2	7.5	8.7	11.2	13.1
	10	10.9	9.6	9.3	8.8	8.8	8.3	8.0	9.8	10.1	11.3	11.9	13.1
	11	7.9	7.4	7.2	7	6.8	6.6	6.6	7.7	8.2	8.5	9.2	10.3	11.3	11.6	12.4	12.6	12	11	9.9	8.7	7.3	6.8	6.4	5.6	5.6	5	4.7	4.6	5.9	4.8	4	5.4	6.7	7.1	8.8	8.8	9	9.2	9.2	9.3	9	8.7	7.5	6	5.8	5.6	5	4
	12
	13
	14	5.4	5.1	4.7	4.4	4	3.5	3.5	4	5.4	7.7	9.4	11.1	13.2	14.2	15	15.1	15	13.5	11.9	11.1	10.6	10.4	10.1	9.5	7.8	7.2	7.3	7.2	6	5.9	5.5	6	8.1	10.2	11.8	12.2	13.8	15.1	15	14.9	15.1	14.2	13.1	12.4	11.4	11	10.9	10.1
	15
	16
	17	9.4	8.6	8.3	7.9	7	6.4	6	6.6	8.9	10.7	13.1	14.8	16.9	18.1	19.2	20	20	18.9	16.7	15.8	14.2	13.6	13.4	13.4	13.6	13.4	12.8	12.7	11.8	10.9	10.2	10.8	11	11.8	14.6	16.2	16.7	16.8	16.4	16.2	15.8	15.1	14.7	14.5	14	13.8	13.3	13.7
	18
	19
	20	12.7	12.8	12.5	11.7	10.6	12.2	10.8	13.9	15.3	16.3	17.5	19.4
	21	13.8	12.9	12.1	11.2	11.0	11.1	10.9	12.0	14.9	16.8	17.9	18.9
	22	13.8	12.7	12.2	11.8	11.5	11.3	11.1	12.4	14.1	16.6	18.1	19.7
	23	13.6	13.0	12.4	12.0	11.9	12.0	11.9	13.2	15.3	17.1	18.7	20.1
	24	14.7	14.0	13.9	13.5	11.0	11.3	11.8	12.9	14.6	16.7	18.8	20.0
	25	10.8	10.0	9.6	8.9	8.4	7.9	7.9	8.9	9.9	11.3	11.9	13.9
	26	11.3	9.5	9.0	8.3	8.0	7.4	7.4	9.6	9.4	9.4	9.3	8.9
	27	8	7.6	6.3	5.7	5.7	5.4	5.5	6.5	7.9	9.3	11.2	13.2	14.1	14.6	15.1	15.2	15	14.3	12.7	11.2	10.6	10.2	8.9	8.1	7.2	7	6.3	5.9	5.1	4.9	5	5.9	7.9	9.9	13	14.8	16	17.7	18.8	19	18.9	18.6	16.7	15.6	13.5	13.1	12.8	12.6
	28
	29
	30
	31
	====	=====	=====	=====	=====	=====	=====	=====	=====	=====	=====	=====	=====
	SRED	9.9	9.4	9.0	8.6	8.2	7.8	7.6	8.5	9.7	11.1	12.5	13.8
	----	-----	-----	-----	-----	-----	-----	-----	-----	-----	-----	-----	-----
	STD	3.1	3.0	3.0	2.9	2.7	2.8	2.8	3.0	3.1	3.5	3.7	4.1
	----	-----	-----	-----	-----	-----	-----	-----	-----	-----	-----	-----	-----
	MAKS	14.7	14.0	13.9	13.5	12.8	12.6	11.9	13.9	15.3	17.1	19.0	20.9
	----	-----	-----	-----	-----	-----	-----	-----	-----	-----	-----	-----	-----
	MIN	3.0	2.6	2.4	2.1	2.1	1.8	1.9	2.8	4.7	4.1	4.2	5.3
	----	-----	-----	-----	-----	-----	-----	-----	-----	-----	-----	-----	-----
	N.P.	0	0	0	0	0	0	0	0	0	0	0	0
	====	=====	=====	=====	=====	=====	=====	=====	=====	=====	=====	=====	=====
DHMZ RH Sluzba za opcu meteorologiju POSTAJA ZAGREB GRIC (236)
ODJEL ZA OBRADU I KONTROLU PODATAKA I KLIMATSKE PODLOGE MJESEC OZUJAK 3
SATNE VRIJEDNOSTI TEMPERATURE ZRAKA (ST.C) ( LIST 2 ) GODINA 2017
SIRINA 45 49 N
IZVOR Termograf IZRADA BROJ VISINA m DULJINA 15 59 E
VISINA 157 m
	----	-----	-----	-----	-----	-----	-----	-----	-----	-----	-----	-----	-----	-----	-----	-----	-----	-----	-----	-----	-----	----
	*SAT
	*	13	14	15	16	17	18	19	20	21	22	23	24	SRED-	STAN.	MAKS.	MIN.	AMPL.	MAKS.	MIN.	AMPL.	BR.
	DAN*													NJAK	DEV.	1*	1*	2*	3*	3*	4*	N.P.
	----	-----	-----	-----	-----	-----	-----	-----	-----	-----	-----	-----	-----	-----	-----	-----	-----	-----	-----	-----	-----	----
	1	6.2	6.8	8.2	9.4	10.0	9.1	7.9	7.2	6.7	6.0	4.8	4.9	7.6	2.9	13.4	4.1	9.3	13.6	3.9	9.7	0
	2	11.7	12.5	12.8	13.0	13.4	12.0	11.4	10.6	9.8	9.2	9.2	8.8	8.1	3.7	13.4	2.6	10.8	13.6	2.6	11.0	0
	3	12.4	13.6	14.3	14.8	14.8	13.8	12.6	11.6	11.1	10.8	9.8	9.7	10.9	2.1	14.8	8.3	6.5	14.8	8.3	6.5	0
	4	18.1	18.6	18.4	18.6	18.4	17.3	16.5	15.7	15.5	15.2	15.3	11.7	12.9	4.3	18.6	7.0	11.6	19.0	7.0	12.0	0
	5	10.6	10.0	9.9	9.6	9.2	8.8	8.6	8.3	7.9	7.5	6.8	6.3	9.5	1.3	11.0	6.3	4.7	11.7	6.3	5.4	0
	6	10.9	11.3	11.1	11.3	10.9	10.6	9.8	8.8	8.6	8.3	7.7	7.0	8.7	1.6	11.3	6.7	4.6	11.3	6.2	5.1	0
	7	10.7	11.1	11.3	10.8	10.8	10.4	10.2	9.8	9.6	9.1	8.8	8.8	8.9	1.5	11.3	7.0	4.3	11.4	7.0	4.4	0
	8	12.2	12.6	13.3	13.1	13.0	12.0	10.9	9.9	9.2	8.8	8.5	7.8	9.8	2.0	13.3	7.4	5.9	13.3	7.4	5.9	0
	9	14.9	15.8	16.1	16.2	15.1	14.2	13.5	12.9	12.5	11.5	11.2	10.9	10.9	3.5	16.2	5.7	10.5	16.2	5.7	10.5	0
	10	13.3	13.2	12.1	11.4	10.4	10.7	9.8	8.4	8.8	9.0	8.7	8.3	10.2	1.6	13.3	8.0	5.3	13.7	7.9	5.8	0
	11	11.3	11.6	12.4	12.6	12.0	11.0	9.9	8.7	7.3	6.8	6.4	5.6	8.7	2.1	12.6	5.6	7.0	12.6	5.6	7.0	0
	12	9.0	9.2	9.2	9.3	9.0	8.7	7.5	6.0	5.8	5.6	5.0	4.0	6.7	1.8	9.3	4.0	5.3	9.5	4.0	5.5	0
	13	10.9	11.6	12.0	12.2	12.0	10.8	9.6	8.4	6.8	6.6	5.7	5.6	6.6	3.7	12.2	1.8	10.4	12.3	1.8	10.5	0
	14	13.2	14.2	15.0	15.1	15.0	13.5	11.9	11.1	10.6	10.4	10.1	9.5	9.1	4.0	15.1	3.5	11.6	15.2	3.2	12.0	0
	15	13.8	15.1	15.0	14.9	15.1	14.2	13.1	12.4	11.4	11.0	10.9	10.1	10.5	3.3	15.1	5.5	9.6	15.2	5.5	9.7	0
	16	15.2	15.3	16.4	17.2	17.2	15.5	14.3	13.6	11.9	10.9	11.9	10.0	11.4	3.6	17.2	6.0	11.2	17.2	5.5	11.7	0
	17	16.9	18.1	19.2	20.0	20.0	18.9	16.7	15.8	14.2	13.6	13.4	13.4	12.8	4.6	20.0	6.0	14.0	20.1	6.0	14.1	0
	18	16.7	16.8	16.4	16.2	15.8	15.1	14.7	14.5	14.0	13.8	13.3	13.7	13.8	2.0	16.8	10.2	6.6	16.8	10.2	6.6	0
	19	15.0	16.3	16.4	16.1	15.8	15.0	14.1	13.6	13.1	12.9	12.5	12.6	13.4	1.5	16.4	10.8	5.6	16.7	10.7	6.0	0
	20	20.1	21.2	21.2	21.7	21.7	20.8	19.6	18.2	17.7	16.8	16.6	14.5	16.5	3.6	21.7	10.6	11.1	21.7	10.5	11.2	0
	21	19.8	21.4	22.0	22.1	22.3	21.6	19.8	18.8	18.0	17.0	16.6	15.7	16.6	3.9	22.3	10.9	11.4	22.3	10.9	11.4	0
	22	20.8	20.8	20.9	20.1	19.2	18.2	17.5	16.4	15.8	15.5	15.0	14.0	15.8	3.3	20.9	11.1	9.8	21.1	10.9	10.2	0
	23	20.7	21.7	21.7	21.9	21.2	19.6	18.7	17.8	16.7	15.8	15.7	15.0	16.6	3.5	21.9	11.9	10.0	22.5	11.9	10.6	0
	24	21.2	21.9	22.3	21.8	21.2	18.3	16.9	15.4	14.2	12.4	12.2	11.3	15.9	3.8	22.3	11.0	11.3	22.6	11.0	11.6	0
	25	15.6	16.6	16.8	17.2	16.6	15.6	14.6	13.0	12.6	12.0	11.6	11.3	12.2	3.0	17.2	7.9	9.3	17.2	7.9	9.3	0
	26	9.1	11.6	12.4	12.7	12.7	12.0	10.4	9.2	8.0	7.2	6.9	7.9	9.5	1.8	12.7	6.9	5.8	12.7	6.9	5.8	0
	27													10.1	3.4	15.2	5.4	9.8	15.2	5.2	10.0	0
	28													11.9	5.0	19.0	4.9	14.1	19.0	4.9	14.1	0
	29													14.9	5.2	22.5	7.6	14.9	22.5	7.6	14.9	0
	30													16.2	4.0	22.2	10.1	12.1	22.2	9.8	12.4	0
	31													16.8	4.1	23.1	10.8	12.3	23.1	10.4	12.7	0
	====	=====	=====	=====	=====	=====	=====	=====	=====	=====	=====	=====	=====	=====	=====	=====	=====	=====	=====	=====	=====	====
	SRED	14.9	15.7	16.0	16.1	15.9	15.0	13.8	12.8	12.0	11.5	11.1	10.5	11.7	3.1	16.5	7.3	9.2	16.7	7.2	9.5
	----	-----	-----	-----	-----	-----	-----	-----	-----	-----	-----	-----	-----	-----	-----	-----	-----	-----	-----	-----	-----	----
	STD	4.2	4.3	4.3	4.3	4.2	4.1	3.8	3.8	3.6	3.5	3.6	3.4
	----	-----	-----	-----	-----	-----	-----	-----	-----	-----	-----	-----	-----	-----	-----	-----	-----	-----	-----	-----	-----	----
	MAKS	21.2	22.2	22.7	23.1	22.6	22.1	20.0	19.0	18.0	17.8	16.9	16.6
	----	-----	-----	-----	-----	-----	-----	-----	-----	-----	-----	-----	-----	-----	-----	-----	-----	-----	-----	-----	-----	----
	MIN	6.2	6.8	8.2	9.3	9.0	8.7	7.5	6.0	5.8	5.6	4.8	4.0
	----	-----	-----	-----	-----	-----	-----	-----	-----	-----	-----	-----	-----	-----	-----	-----	-----	-----	-----	-----	-----	----
	N.P.	0	0	0	0	0	0	0	0	0	0	0	0									0
	====	=====	=====	=====	=====	=====	=====	=====	=====	=====	=====	=====	=====	=====	=====	=====	=====	=====	=====	=====	=====	====
1* IZ SATNIH VRIJEDNOSTI 1-24, 2* IZ SATNIH EKSTREMA, 3* PO DIJAGRAMU, 4* IZ EKSTREMA PO DIJAGRAMU
N.P. - BROJ NEDOSTAJUCIH PODATAKA
DHMZ RH Sluzba za opcu meteorologiju POSTAJA ZAGREB GRIC (236)
ODJEL ZA OBRADU I KONTROLU PODATAKA I KLIMATSKE PODLOGE MJESEC TRAVANJ 4
SATNE VRIJEDNOSTI TEMPERATURE ZRAKA (ST.C) ( LIST 1 ) GODINA 2017
SIRINA 45 49 N
IZVOR Termograf IZRADA BROJ VISINA m DULJINA 15 59 E
VISINA 157 m
	----	-----	-----	-----	-----	-----	-----	-----	-----	-----	-----	-----	-----
	*SAT
	*	1	2	3	4	5	6	7	8	9	10	11	12
	DAN*
	----	-----	-----	-----	-----	-----	-----	-----	-----	-----	-----	-----	-----
	1	15.8	15	14.1	13.8	12.9	12	11	12.1	14	16	18.4	21	23.8	23.7	24.4	24.8	23.8	23.1	20.9	19.7	18.2	17.3	16.6	16.8	15.8	15.4	14.3	12.9	11.9	11.5	11.5	13	15.1	18	19.4	21.3	23	23.4	24	24.1	23.8	22.9	20.8	19.7	18.8	18.8	18.7	18.6
	2
	3
	4
	5	12.7	13.2	13.0	11.9	11.9	12.0	12.0	12.0	13.2	13.9	14.9	15.0
	6	11.8	11.7	11.6	11.6	11.5	11.8	11.3	11.9	11.1	12.7	12.8	14.4
	7	8.8	7.4	6.9	6.6	6.1	6.2	7.5	8.8	10.5	12.2	13.1	14.9
	8	10.7	10.7	10.5	10.1	9.8	9.8	9.8	11.0	13.0	14.2	16.6	17.7
	9	12.6	12.5	11.7	11.3	11.3	11.5	12.3	13.3	14.7	15.5	16.4	18.6
	10	14.6	14.4	13.9	12.9	11.7	11.1	10.7	12	14.1	16	18.7	20.5	22.3	23.2	24.2	24.4	24.2	23.1	21.2	20	20.1	19	18.8	18.2	17	16	15.5	16.6	16.3	15.8	16.4	17.2	17.1	18.6	18.3	17.5	17	17.2	16.5	16.2	14.9	12.8	12.3	11.7	11.4	11.1	10.8	10
	11
	12
	13
	14
	15
	16
	17
	18
	19	6.4	5.7	5.5	5.3	5.1	5.0	5.6	6.0	6.6	6.8	6.7	7.1
	20	2.1	2.2	2.3	3.1	3.0	4.2	4.3	5.0	4.9	5.1	5.5	7.3	7.6	7.5	8.5	8.2	7.9	7.1	5.9	5.3	5.0	4.4	4.4	4.4	4.0	3.6	3.1	3.0	2.7	1.8	2.8	4.1	5.2	7.1	8.3	9.0	10.5	11.0	11.9	11.9	12.0	11.1	10.5	8.8	7.5	7.0	6.1	5.6
	21
	22
	23
	24
	25
	26
	27
	28
	29	8.4	7.8	7.2	7.1	7.1	7.5	7.8	8.5	9.9	11.3	11.0	12.7
	30	7.2	6.8	6.1	5.9	5.8	5.8	6.4	7.9	10.0	12.5	14.9	15.2
	====	=====	=====	=====	=====	=====	=====	=====	=====	=====	=====	=====	=====
	SRED	11.3	10.9	10.5	10.2	9.8	9.7	10.0	10.9	12.0	13.5	14.7	15.7
	----	-----	-----	-----	-----	-----	-----	-----	-----	-----	-----	-----	-----
	STD	3.8	3.9	3.8	3.6	3.6	3.7	3.6	3.6	3.7	3.8	4.0	4.2
	----	-----	-----	-----	-----	-----	-----	-----	-----	-----	-----	-----	-----
	MAKS	18.8	18.9	17.0	16.6	16.3	15.8	16.9	17.4	18.4	19.1	19.8	22.0
	----	-----	-----	-----	-----	-----	-----	-----	-----	-----	-----	-----	-----
	MIN	2.1	2.2	2.3	3.0	2.4	1.8	2.8	4.1	4.2	5.1	5.5	7.1
	----	-----	-----	-----	-----	-----	-----	-----	-----	-----	-----	-----	-----
	N.P.	0	0	0	0	0	0	0	0	0	0	0	0
	====	=====	=====	=====	=====	=====	=====	=====	=====	=====	=====	=====	=====
DHMZ RH Sluzba za opcu meteorologiju POSTAJA ZAGREB GRIC (236)
ODJEL ZA OBRADU I KONTROLU PODATAKA I KLIMATSKE PODLOGE MJESEC TRAVANJ 4
SATNE VRIJEDNOSTI TEMPERATURE ZRAKA (ST.C) ( LIST 2 ) GODINA 2017
SIRINA 45 49 N
IZVOR Termograf IZRADA BROJ VISINA m DULJINA 15 59 E
VISINA 157 m
	----	-----	-----	-----	-----	-----	-----	-----	-----	-----	-----	-----	-----	-----	-----	-----	-----	-----	-----	-----	-----	----
	*SAT
	*	13	14	15	16	17	18	19	20	21	22	23	24	SRED-	STAN.	MAKS.	MIN.	AMPL.	MAKS.	MIN.	AMPL.	BR.
	DAN*													NJAK	DEV.	1*	1*	2*	3*	3*	4*	N.P.
	----	-----	-----	-----	-----	-----	-----	-----	-----	-----	-----	-----	-----	-----	-----	-----	-----	-----	-----	-----	-----	----
	1													17.9	4.3	24.8	11.0	13.8	24.8	11.0	13.8	0
	2													18.2	4.2	24.1	11.5	12.6	24.3	11.4	12.9	0
	3													18.6	4.1	24.7	12.2	12.5	24.7	12.0	12.7	0
	4													16.7	1.8	19.2	12.9	6.3	19.2	12.9	6.3	0
	5	16.8	17.0	16.8	16.9	16.9	16.6	15.7	15.1	14.8	14.5	12.0	11.9	14.2	1.9	17.0	11.9	5.1	17.2	11.8	5.4	0
	6	13.6	14.2	12.4	12.0	12.1	12.1	11.5	10.8	10.0	9.5	9.1	8.9	11.7	1.4	14.4	8.9	5.5	15.4	8.8	6.6	0
	7	15.9	16.9	17.7	17.5	16.8	16.2	13.7	12.9	12.6	12.1	10.9	10.7	11.8	3.8	17.7	6.1	11.6	17.8	6.1	11.7	0
	8	18.6	18.9	19.7	19.3	19.0	17.5	16.1	14.8	14.0	13.2	12.6	12.1	14.2	3.5	19.7	9.8	9.9	19.8	9.7	10.1	0
	9	19.3	20.4	20.0	20.5	20.5	19.7	18.5	16.9	16.1	15.7	15.6	14.8	15.8	3.2	20.5	11.3	9.2	21.1	11.3	9.8	0
	10													17.9	4.5	24.4	10.7	13.7	24.4	10.7	13.7	0
	11													15.2	2.6	18.6	10.0	8.6	18.6	10.0	8.6	0
	12													13.0	3.1	17.8	8.3	9.5	17.8	8.1	9.7	0
	13													15.8	4.4	23.0	10.0	13.0	23.3	10.0	13.3	0
	14													16.5	3.4	21.8	12.0	9.8	21.8	11.8	10.0	0
	15													13.0	1.5	15.6	11.1	4.5	15.8	11.0	4.8	0
	16													11.7	1.3	14.8	10.4	4.4	15.9	10.4	5.5	0
	17													11.1	2.4	14.9	7.6	7.3	14.9	7.6	7.3	0
	18													8.2	0.7	9.7	6.8	2.9	9.8	6.8	3.0	0
	19	7.4	7.4	6.1	5.9	5.7	4.8	4.2	2.9	2.8	2.3	2.2	2.1	5.2	1.6	7.4	2.1	5.3	7.5	2.1	5.4	0
	20													5.2	1.9	8.5	2.1	6.4	8.5	2.1	6.4	0
	21													7.0	3.3	12.0	1.8	10.2	12.0	1.8	10.2	0
	22													11.4	5.8	18.8	2.4	16.4	18.8	2.3	16.5	0
	23													8.8	2.7	12.9	4.2	8.7	13.0	4.1	8.9	0
	24													13.1	3.5	18.5	8.1	10.4	19.1	7.9	11.2	0
	25													15.5	3.0	20.0	10.7	9.3	20.1	10.7	9.4	0
	26													17.0	3.2	21.8	11.9	9.9	22.2	11.9	10.3	0
	27													16.6	2.2	19.9	12.2	7.7	19.9	12.0	7.9	0
	28													12.7	1.7	15.7	9.9	5.8	15.8	9.9	5.9	0
	29	14.1	13.4	13.9	13.9	13.5	13.3	13.0	11.7	10.2	9.6	8.6	7.8	10.4	2.5	14.1	7.1	7.0	14.5	7.1	7.4	0
	30	16.4	17.2	17.4	17.6	16.8	16.0	15.1	14.0	13.6	13.3	13.0	12.9	12.0	4.3	17.6	5.8	11.8	17.6	5.7	11.9	0
	====	=====	=====	=====	=====	=====	=====	=====	=====	=====	=====	=====	=====	=====	=====	=====	=====	=====	=====	=====	=====	====
	SRED	16.5	16.8	17.0	16.9	16.5	15.8	14.8	13.8	13.2	12.7	12.1	11.7	13.2	2.9	17.7	8.7	9.0	17.9	8.6	9.2
	----	-----	-----	-----	-----	-----	-----	-----	-----	-----	-----	-----	-----	-----	-----	-----	-----	-----	-----	-----	-----	----
	STD	4.5	4.7	5.0	5.0	4.8	4.7	4.3	4.2	4.2	4.1	4.0	3.9
	----	-----	-----	-----	-----	-----	-----	-----	-----	-----	-----	-----	-----	-----	-----	-----	-----	-----	-----	-----	-----	----
	MAKS	23.8	24.0	24.7	24.8	24.2	23.1	21.2	20.3	20.1	19.5	18.9	18.6
	----	-----	-----	-----	-----	-----	-----	-----	-----	-----	-----	-----	-----	-----	-----	-----	-----	-----	-----	-----	-----	----
	MIN	7.4	7.4	6.1	5.9	5.7	4.8	4.2	2.9	2.8	2.3	2.2	2.1
	----	-----	-----	-----	-----	-----	-----	-----	-----	-----	-----	-----	-----	-----	-----	-----	-----	-----	-----	-----	-----	----
	N.P.	0	0	0	0	0	0	0	0	0	0	0	0									0
	====	=====	=====	=====	=====	=====	=====	=====	=====	=====	=====	=====	=====	=====	=====	=====	=====	=====	=====	=====	=====	====
1* IZ SATNIH VRIJEDNOSTI 1-24, 2* IZ SATNIH EKSTREMA, 3* PO DIJAGRAMU, 4* IZ EKSTREMA PO DIJAGRAMU
N.P. - BROJ NEDOSTAJUCIH PODATAKA
DHMZ RH Sluzba za opcu meteorologiju POSTAJA ZAGREB GRIC (236)
ODJEL ZA OBRADU I KONTROLU PODATAKA I KLIMATSKE PODLOGE MJESEC SVIBANJ 5
SATNE VRIJEDNOSTI TEMPERATURE ZRAKA (ST.C) ( LIST 1 ) GODINA 2017
SIRINA 45 49 N
IZVOR Termograf IZRADA BROJ VISINA m DULJINA 15 59 E
VISINA 157 m
	----	-----	-----	-----	-----	-----	-----	-----	-----	-----	-----	-----	-----
	*SAT
	*	1	2	3	4	5	6	7	8	9	10	11	12
	DAN*
	----	-----	-----	-----	-----	-----	-----	-----	-----	-----	-----	-----	-----
	1	12.6	12.4	12.0	11.7	11.1	11.1	11.4	12.5	13.7	14.8	15.9	17.5
	2	15.6	14.8	14.4	13.9	13.6	12.7	13.1	14.1	15.5	17.0	17.9	18.8
	3	13.9	14.7	14.6	14.2	13.6	13.6	13.6	13.4	13.3	13.2	15	16	16.9	18.2	18.9	18.6	18.8	17.2	15.7	14.6	13.6	13.2	12.4	12	11.3	11	11	10.8	11	11.4	12	12.7	13.5	15.9	18.3	20.4	19.6	18	18.4	19.5	19.6	19.7	19.1	17.6	16	15.8	15.5	14.9
	4
	5
	6
	7
	8
	9
	10
	11
	12	15.7	15.6	15.0	14.6	14.0	14.1	15.3	17.1	18.6	20.7	22.4	23.8
	13	18.4	17.1	15.8	15.4	14.9	15.1	15.9	16.9	18.3	19.7	20.5	22.3
	14	17.4	16.6	15.2	16.2	16.7	15.8	16.9	19.1	19.8	21	23	24.4	23.7	24.6	25.7	24.9	21.4	21	20	19.2	19.8	19.8	19	18.6	17.7	17.3	16.2	16.1	15.6	15.4	15.2	15.2	15.7	17.6	17.7	17.8	17.7	18.1	19.9	20	19.7	19.3	18.4	17.9	17.8	17.3	17	16.1
	15
	16
	17
	18
	19
	20
	21
	22
	23	18.5	18.2	17.4	16.9	16.2	16.2	17.3	18.2	20.1	21.9	23.6	25.3	25.9	25.6	25.4	26.6	26.4	25.4	23.6	22.9	20.8	19.0	18.2	17.4	16.6	17	16.9	17	16.8	16.1	18	19.5	20.4	19.9	18.9	19.3	20.9	21.6	21.8	21.9	21.9	20	18.6	18	17.8	17.5	17.1	16.7
	24
	25
	26
	27
	28
	29
	30
	31
	====	=====	=====	=====	=====	=====	=====	=====	=====	=====	=====	=====	=====
	SRED	16.0	15.6	15.1	14.8	14.5	14.5	15.5	16.6	17.8	19.1	20.3	21.3
	----	-----	-----	-----	-----	-----	-----	-----	-----	-----	-----	-----	-----
	STD	2.9	2.8	2.7	2.7	2.6	2.6	3.1	3.4	3.6	3.8	3.8	3.9
	----	-----	-----	-----	-----	-----	-----	-----	-----	-----	-----	-----	-----
	MAKS	20.7	19.8	19.7	20.0	19.7	21.3	22.4	24.0	26.1	27.8	28.7	29.7
	----	-----	-----	-----	-----	-----	-----	-----	-----	-----	-----	-----	-----
	MIN	8.8	8.6	8.6	8.4	8.2	7.8	8.2	9.1	10.2	11.7	13.1	13.9
	----	-----	-----	-----	-----	-----	-----	-----	-----	-----	-----	-----	-----
	N.P.	0	0	0	0	0	0	0	0	0	0	0	0
	====	=====	=====	=====	=====	=====	=====	=====	=====	=====	=====	=====	=====
DHMZ RH Sluzba za opcu meteorologiju POSTAJA ZAGREB GRIC (236)
ODJEL ZA OBRADU I KONTROLU PODATAKA I KLIMATSKE PODLOGE MJESEC SVIBANJ 5
SATNE VRIJEDNOSTI TEMPERATURE ZRAKA (ST.C) ( LIST 2 ) GODINA 2017
SIRINA 45 49 N
IZVOR Termograf IZRADA BROJ VISINA m DULJINA 15 59 E
VISINA 157 m
	----	-----	-----	-----	-----	-----	-----	-----	-----	-----	-----	-----	-----	-----	-----	-----	-----	-----	-----	-----	-----	----
	*SAT
	*	13	14	15	16	17	18	19	20	21	22	23	24	SRED-	STAN.	MAKS.	MIN.	AMPL.	MAKS.	MIN.	AMPL.	BR.
	DAN*													NJAK	DEV.	1*	1*	2*	3*	3*	4*	N.P.
	----	-----	-----	-----	-----	-----	-----	-----	-----	-----	-----	-----	-----	-----	-----	-----	-----	-----	-----	-----	-----	----
	1	18.4	18.7	19.6	19.9	20.0	19.6	18.9	17.2	16.8	16.6	15.9	15.7	15.6	3.1	20.0	11.1	8.9	20.0	11.1	8.9	0
	2	20.2	20.5	21.1	21.1	21.0	20.7	19.9	17.6	16.3	15.1	14.7	13.9	16.8	2.9	21.1	12.7	8.4	21.4	12.7	8.7	0
	3													15.0	2.0	18.9	12.0	6.9	19.0	12.0	7.0	0
	4													15.5	3.4	20.4	10.8	9.6	20.6	10.8	9.8	0
	5													13.0	1.2	14.8	10.7	4.1	14.9	10.7	4.2	0
	6													16.1	4.4	23.2	9.4	13.8	23.2	9.4	13.8	0
	7													14.5	2.0	17.8	11.8	6.0	17.8	11.8	6.0	0
	8													16.1	2.4	20.6	12.8	7.8	20.8	12.7	8.1	0
	9													12.4	1.7	14.7	8.9	5.8	14.8	8.9	5.9	0
	10													12.4	3.4	17.6	7.8	9.8	17.9	7.6	10.3	0
	11													17.0	4.3	22.7	10.0	12.7	22.7	9.9	12.8	0
	12	24.7	25.0	25.5	25.3	24.1	23.4	21.8	20.7	19.9	19.3	18.7	18.7	19.7	3.9	25.5	14.0	11.5	25.5	13.9	11.6	0
	13	22.2	22.2	21.6	21.1	22.1	22.0	21.0	19.1	17.9	17.1	16.5	17.2	18.8	2.5	22.3	14.9	7.4	22.7	14.8	7.9	0
	14													20.0	3.0	25.7	15.2	10.5	26.0	15.2	10.8	0
	15													17.4	1.4	20.0	15.2	4.8	21.1	15.1	6.0	0
	16													20.2	3.3	24.3	14.8	9.5	24.6	14.8	9.8	0
	17													20.6	2.2	24.3	17.2	7.1	24.3	17.2	7.1	0
	18													20.8	3.9	26.0	14.4	11.6	26.2	14.2	12.0	0
	19													21.7	4.1	28.1	15.4	12.7	28.1	15.3	12.8	0
	20													19.2	2.1	23.7	15.7	8.0	23.7	15.7	8.0	0
	21													18.8	2.4	22.7	15.6	7.1	22.7	15.6	7.1	0
	22													20.3	4.1	26.1	14.1	12.0	26.1	13.9	12.2	0
	23													21.1	3.6	26.6	16.2	10.4	26.6	16.0	10.6	0
	24													18.8	1.9	21.9	16.1	5.8	22.3	16.1	6.2	0
	25													17.5	2.2	21.1	13.9	7.2	21.2	13.9	7.3	0
	26													19.2	3.1	23.3	14.1	9.2	23.7	13.9	9.8	0
	27													21.5	3.1	25.8	16.3	9.5	26.3	16.3	10.0	0
	28													21.7	3.3	26.7	16.0	10.7	26.8	15.9	10.9	0
	29													21.9	4.3	28.0	15.3	12.7	28.2	15.1	13.1	0
	30													23.9	4.4	29.9	17.6	12.3	30.1	17.6	12.5	0
	31													24.1	3.9	30.1	19.4	10.7	30.3	19.4	10.9	0
	====	=====	=====	=====	=====	=====	=====	=====	=====	=====	=====	=====	=====	=====	=====	=====	=====	=====	=====	=====	=====	====
	SRED	22.1	22.3	22.5	22.3	22.1	21.4	20.3	19.1	18.2	17.5	16.9	16.6	18.4	3.0	23.0	13.9	9.2	23.2	13.8	9.4
	----	-----	-----	-----	-----	-----	-----	-----	-----	-----	-----	-----	-----	-----	-----	-----	-----	-----	-----	-----	-----	----
	STD	3.9	4.2	4.1	4.0	3.9	3.9	3.7	3.5	3.3	3.0	3.0	2.9
	----	-----	-----	-----	-----	-----	-----	-----	-----	-----	-----	-----	-----	-----	-----	-----	-----	-----	-----	-----	-----	----
	MAKS	30.1	29.8	29.9	29.6	29.4	28.5	27.4	26.4	25.2	23.6	22.5	21.4
	----	-----	-----	-----	-----	-----	-----	-----	-----	-----	-----	-----	-----	-----	-----	-----	-----	-----	-----	-----	-----	----
	MIN	14.5	12.4	13.0	13.3	13.2	12.7	11.7	10.8	9.8	9.4	9.1	8.9
	----	-----	-----	-----	-----	-----	-----	-----	-----	-----	-----	-----	-----	-----	-----	-----	-----	-----	-----	-----	-----	----
	N.P.	0	0	0	0	0	0	0	0	0	0	0	0									0
	====	=====	=====	=====	=====	=====	=====	=====	=====	=====	=====	=====	=====	=====	=====	=====	=====	=====	=====	=====	=====	====
1* IZ SATNIH VRIJEDNOSTI 1-24, 2* IZ SATNIH EKSTREMA, 3* PO DIJAGRAMU, 4* IZ EKSTREMA PO DIJAGRAMU
N.P. - BROJ NEDOSTAJUCIH PODATAKA
[truncated: 168 more columns]

## Sheet: cxC 7,1kW
Time	Voltage, V	Current, A	Hours	EST, °C	LST, °C	Time	Hours	Tair °C
12:05:00	234.436	0	0	14.557	14.581	12:00:00	0	10.3
12:10:00	220.998	27.4525	0.0833333	14.471	17.047	13:00:00	1	11.3
12:15:00	217.237	33.4986	0.166667	14.586	18.546	14:00:00	2	11.6
12:20:00	216.892	33.4446	0.25	16.167	20.406	15:00:00	3	12.4
12:25:00	216.946	33.447	0.333333	17.237	21.46	16:00:00	4	12.6
12:30:00	216.742	33.4094	0.416667	18.355	22.567	17:00:00	5	12
12:35:00	216.397	33.3461	0.5	19.189	23.389	18:00:00	6	11
12:40:00	216.72	33.386	0.583333	19.952	24.166	19:00:00	7	9.9
12:45:00	216.278	33.3226	0.666667	20.574	24.8	20:00:00	8	8.7
12:50:00	216.548	33.3602	0.75	21.148	25.363	21:00:00	9	7.3
12:55:00	216.601	33.3695	0.833333	21.652	25.854	22:00:00	10	6.8
13:00:00	216.763	33.386	0.916667	22.109	26.323	23:00:00	11	6.4
13:05:00	217.291	33.447	1	22.519	26.744	1900-01-01	12	5.6
13:10:00	217.539	33.4939	1.08333	22.905	27.141	1900-01-01 01:00:00	13	5.6
13:15:00	217.28	33.461	1.16667	23.244	27.49	1900-01-01 02:00:00	14	5
13:20:00	217.28	33.4587	1.25	23.583	27.79	1900-01-01 03:00:00	15	4.7
13:25:00	217.345	33.4728	1.33333	23.85	28.09	1900-01-01 04:00:00	16	4.6
13:30:00	217.129	33.4188	1.41667	24.141	28.366	1900-01-01 05:00:00	17	5.9
13:35:00	217.754	33.5197	1.5	24.385	28.618	1900-01-01 06:00:00	18	4.8
13:40:00	217.884	33.5408	1.58333	24.629	28.871	1900-01-01 07:00:00	19	4
13:45:00	217.862	33.5338	1.66667	24.849	29.098	1900-01-01 08:00:00	20	5.4
13:50:00	217.42	33.4681	1.75	25.069	29.301	1900-01-01 09:00:00	21	6.7
13:55:00	217.41	33.4634	1.83333	25.265	29.504	1900-01-01 10:00:00	22	7.1
14:00:00	217.884	33.5291	1.91667	25.461	29.682	1900-01-01 11:00:00	23	8.8
14:05:00	217.722	33.5033	2	25.633	29.861	1900-01-01 12:00:00	24	8.8
14:10:00	217.765	33.5056	2.08333	25.781	30.04	1900-01-01 13:00:00	25	9
14:15:00	217.744	33.5056	2.16667	25.953	30.193	1900-01-01 14:00:00	26	9.2
14:20:00	217.981	33.5361	2.25	26.101	30.347	1900-01-01 15:00:00	27	9.2
14:25:00	217.905	33.5267	2.33333	26.249	30.501	1900-01-01 16:00:00	28	9.3
14:30:00	216.3	33.2921	2.41667	26.397	30.578	1900-01-01 17:00:00	29	9
14:35:00	215.459	33.1631	2.5	26.521	30.681	1900-01-01 18:00:00	30	8.7
14:40:00	215.384	33.1513	2.58333	26.595	30.758	1900-01-01 19:00:00	31	7.5
14:45:00	215.362	33.149	2.66667	26.719	30.862	1900-01-01 20:00:00	32	6
14:50:00	215.319	33.1467	2.75	26.793	30.965	1900-01-01 21:00:00	33	5.8
14:55:00	215.211	33.1373	2.83333	26.893	31.042	1900-01-01 22:00:00	34	5.6
15:00:00	215.341	33.1326	2.91667	26.992	31.12	1900-01-01 23:00:00	35	5
15:05:00	215.233	33.1349	3	27.066	31.224	1900-01-02	36	4
15:10:00	215.362	33.1537	3.08333	27.166	31.327	1900-01-02 01:00:00	37	3
15:15:00	215.308	33.1467	3.16667	27.265	31.405	1900-01-02 02:00:00	38	2.6
15:20:00	215.395	33.1537	3.25	27.34	31.483	1900-01-02 03:00:00	39	2.4
15:25:00	215.179	33.1255	3.33333	27.44	31.561	1900-01-02 04:00:00	40	2.1
15:30:00	215.168	33.1115	3.41667	27.515	31.639	1900-01-02 05:00:00	41	2.1
15:35:00	215.276	33.1326	3.5	27.59	31.717	1900-01-02 06:00:00	42	1.8
15:40:00	215.319	33.1396	3.58333	27.665	31.821	1900-01-02 07:00:00	43	1.9
15:45:00	215.524	33.1654	3.66667	27.739	31.9	1900-01-02 08:00:00	44	2.8
15:50:00	215.265	33.1138	3.75	27.84	31.978	1900-01-02 09:00:00	45	4.9
15:55:00	215.826	33.203	3.83333	27.915	32.057	1900-01-02 10:00:00	46	6.3
16:00:00	215.567	33.1748	3.91667	27.965	32.109	1900-01-02 11:00:00	47	7.8
16:05:00	215.125	33.1138	4	28.04	32.187	1900-01-02 12:00:00	48	9.5
16:10:00	215.341	33.1373	4.08333	28.115	32.266	1900-01-02 13:00:00	49	10.9
16:15:00	215.114	33.1068	4.16667	28.19	32.319	1900-01-02 14:00:00	50	11.6
16:20:00	215.19	33.1091	4.25	28.241	32.371	1900-01-02 15:00:00	51	12
16:25:00	215.416	33.1326	4.33333	28.291	32.45	1900-01-02 16:00:00	52	12.2
16:30:00	215.287	33.1208	4.41667	28.366	32.502	1900-01-02 17:00:00	53	12
16:35:00	215.588	33.1678	4.5	28.417	32.581	1900-01-02 18:00:00	54	10.8
16:40:00	215.912	33.2053	4.58333	28.492	32.634	1900-01-02 19:00:00	55	9.6
16:45:00	215.621	33.1725	4.66667	28.543	32.687	1900-01-02 20:00:00	56	8.4
16:50:00	215.621	33.1818	4.75	28.618	32.766	1900-01-02 21:00:00	57	6.8
16:55:00	215.782	33.1912	4.83333	28.669	32.819	1900-01-02 22:00:00	58	6.6
17:00:00	215.739	33.1912	4.91667	28.744	32.872	1900-01-02 23:00:00	59	5.7
17:05:00	215.481	33.1631	5	28.795	32.924	1900-01-03	60	5.6
17:10:00	215.416	33.1443	5.08333	28.845	32.977	1900-01-03 01:00:00	61	5.4
17:15:00	214.942	33.081	5.16667	28.896	33.004	1900-01-03 02:00:00	62	5.1
17:20:00	214.769	33.0528	5.25	28.946	33.057	1900-01-03 03:00:00	63	4.7
17:25:00	214.716	33.0458	5.33333	28.972	33.083	1900-01-03 04:00:00	64	4.4
17:30:00	214.651	33.0223	5.41667	29.022	33.136	1900-01-03 05:00:00	65	4
17:35:00	214.802	33.0458	5.5	29.073	33.189	1900-01-03 06:00:00	66	3.5
17:40:00	214.877	33.0528	5.58333	29.098	33.216	1900-01-03 07:00:00	67	3.5
17:45:00	214.554	33.0082	5.66667	29.149	33.242	1900-01-03 08:00:00	68	4
17:50:00	214.651	33.0129	5.75	29.2	33.295	1900-01-03 09:00:00	69	5.4
17:55:00	214.263	32.9613	5.83333	29.225	33.322	1900-01-03 10:00:00	70	7.7
18:00:00	213.929	32.9261	5.91667	29.276	33.349	1900-01-03 11:00:00	71	9.4
18:05:00	213.918	32.9261	6	29.301	33.375	1900-01-03 12:00:00	72	11.1
18:10:00	213.379	32.8487	6.08333	29.326	33.375	1900-01-03 13:00:00	73	13.2
18:15:00	212.442	32.715	6.16667	29.352	33.402	1900-01-03 14:00:00	74	14.2
18:20:00	213.541	32.8581	6.25	29.377	33.455	1900-01-03 15:00:00	75	15
18:25:00	214.123	32.9425	6.33333	29.403	33.482	1900-01-03 16:00:00	76	15.1
18:30:00	214.112	32.9449	6.41667	29.428	33.535	1900-01-03 17:00:00	77	15
18:35:00	213.897	32.9144	6.5	29.479	33.562	1900-01-03 18:00:00	78	13.5
18:40:00	214.295	32.9637	6.58333	29.53	33.615	1900-01-03 19:00:00	79	11.9
18:45:00	214.123	32.9496	6.66667	29.555	33.642	1900-01-03 20:00:00	80	11.1
18:50:00	214.295	32.9848	6.75	29.606	33.695	1900-01-03 21:00:00	81	10.6
18:55:00	213.972	32.9214	6.83333	29.631	33.722	1900-01-03 22:00:00	82	10.4
19:00:00	214.058	32.9378	6.91667	29.657	33.748	1900-01-03 23:00:00	83	10.1
19:05:00	214.338	32.9848	7	29.708	33.775	1900-01-04	84	9.5
19:10:00	213.8	32.8933	7.08333	29.733	33.802	1900-01-04 01:00:00	85	7.8
19:15:00	214.015	32.9378	7.16667	29.759	33.855	1900-01-04 02:00:00	86	7.2
19:20:00	214.306	32.9754	7.25	29.81	33.882	1900-01-04 03:00:00	87	7.3
19:25:00	214.511	33.0035	7.33333	29.835	33.936	1900-01-04 04:00:00	88	7.2
19:30:00	214.662	33.0106	7.41667	29.886	33.989	1900-01-04 05:00:00	89	6
19:35:00	214.338	32.9801	7.5	29.912	33.989	1900-01-04 06:00:00	90	5.9
19:40:00	214.694	33.027	7.58333	29.937	34.043	1900-01-04 07:00:00	91	5.5
19:45:00	214.866	33.0458	7.66667	29.989	34.097	1900-01-04 08:00:00	92	6
19:50:00	214.931	33.0458	7.75	30.04	34.123	1900-01-04 09:00:00	93	8.1
19:55:00	214.823	33.0458	7.83333	30.065	34.15	1900-01-04 10:00:00	94	10.2
20:00:00	214.963	33.0598	7.91667	30.091	34.204	1900-01-04 11:00:00	95	11.8
20:05:00	215.179	33.0997	8	30.142	34.258	1900-01-04 12:00:00	96	12.2
20:10:00	215.632	33.1607	8.08333	30.168	34.312	1900-01-04 13:00:00	97	13.8
20:15:00	215.815	33.1936	8.16667	30.219	34.339	1900-01-04 14:00:00	98	15.1
20:20:00	215.524	33.1467	8.25	30.244	34.365	1900-01-04 15:00:00	99	15
20:25:00	215.664	33.1654	8.33333	30.296	34.419	1900-01-04 16:00:00	100	14.9
20:30:00	215.588	33.156	8.41667	30.321	34.446	1900-01-04 17:00:00	101	15.1
20:35:00	215.416	33.1302	8.5	30.373	34.5	1900-01-04 18:00:00	102	14.2
20:40:00	215.998	33.2217	8.58333	30.398	34.527	1900-01-04 19:00:00	103	13.1
20:45:00	215.696	33.1748	8.66667	30.424	34.554	1900-01-04 20:00:00	104	12.4
20:50:00	215.804	33.1865	8.75	30.475	34.608	1900-01-04 21:00:00	105	11.4
20:55:00	216.16	33.2382	8.83333	30.501	34.662	1900-01-04 22:00:00	106	11
21:00:00	216.278	33.2499	8.91667	30.553	34.689	1900-01-04 23:00:00	107	10.9
21:05:00	215.804	33.1842	9	30.578	34.717	1900-01-05	108	10.1
21:10:00	216.181	33.2358	9.08333	30.604	34.771	1900-01-05 01:00:00	109	9.8
21:15:00	216.3	33.2522	9.16667	30.655	34.798	1900-01-05 02:00:00	110	8.7
21:20:00	216.451	33.2851	9.25	30.681	34.825	1900-01-05 03:00:00	111	7.8
21:25:00	216.451	33.2757	9.33333	30.707	34.879	1900-01-05 04:00:00	112	7.3
21:30:00	216.698	33.3085	9.41667	30.758	34.906	1900-01-05 05:00:00	113	7
21:35:00	216.774	33.3226	9.5	30.784	34.933	1900-01-05 06:00:00	114	6.2
21:40:00	217.367	33.4071	9.58333	30.81	34.988	1900-01-05 07:00:00	115	6
21:45:00	216.946	33.3508	9.66667	30.862	35.015	1900-01-05 08:00:00	116	6.3
21:50:00	217.377	33.4165	9.75	30.887	35.069	1900-01-05 09:00:00	117	9.2
21:55:00	217.679	33.4564	9.83333	30.939	35.124	1900-01-05 10:00:00	118	10.6
22:00:00	217.539	33.4423	9.91667	30.991	35.151	1900-01-05 11:00:00	119	12.3
22:05:00	217.259	33.3977	10	31.017	35.178	1900-01-05 12:00:00	120	13.3
22:10:00	216.882	33.339	10.0833	31.042	35.205	1900-01-05 13:00:00	121	15.2
22:15:00	214.845	33.0458	10.1667	31.068	35.178	1900-01-05 14:00:00	122	15.3
22:20:00	214.942	33.0552	10.25	31.068	35.178	1900-01-05 15:00:00	123	16.4
22:25:00	214.953	33.0598	10.3333	31.068	35.178	1900-01-05 16:00:00	124	17.2
22:30:00	214.414	32.9824	10.4167	31.068	35.151	1900-01-05 17:00:00	125	17.2
22:35:00	214.371	32.9683	10.5	31.094	35.151	1900-01-05 18:00:00	126	15.5
22:40:00	214.198	32.9519	10.5833	31.094	35.151	1900-01-05 19:00:00	127	14.3
22:45:00	214.64	33.0153	10.6667	31.094	35.178	1900-01-05 20:00:00	128	13.6
22:50:00	214.985	33.0692	10.75	31.094	35.205	1900-01-05 21:00:00	129	11.9
22:55:00	215.071	33.0716	10.8333	31.12	35.233	1900-01-05 22:00:00	130	10.9
23:00:00	215.33	33.1115	10.9167	31.12	35.233	1900-01-05 23:00:00	131	11.9
23:05:00	215.201	33.0974	11	31.146	35.26	1900-01-06	132	10
23:10:00	215.384	33.1279	11.0833	31.172	35.315	1900-01-06 01:00:00	133	9.4
23:15:00	215.535	33.142	11.1667	31.198	35.315	1900-01-06 02:00:00	134	8.6
23:20:00	215.599	33.1513	11.25	31.224	35.342	1900-01-06 03:00:00	135	8.3
23:25:00	215.545	33.149	11.3333	31.249	35.369	1900-01-06 04:00:00	136	7.9
23:30:00	215.987	33.2077	11.4167	31.275	35.424	1900-01-06 05:00:00	137	7
23:35:00	216.009	33.2053	11.5	31.301	35.451	1900-01-06 06:00:00	138	6.4
23:40:00	215.826	33.1818	11.5833	31.327	35.451	1900-01-06 07:00:00	139	6
23:45:00	215.567	33.1467	11.6667	31.353	35.478	1900-01-06 08:00:00	140	6.6
23:50:00	216.02	33.2123	11.75	31.379	35.506	1900-01-06 09:00:00	141	8.9
23:55:00	216.569	33.2945	11.8333	31.405	35.533	1900-01-06 10:00:00	142	10.7
00:00:00	216.817	33.3367	11.9167	31.431	35.588	1900-01-06 11:00:00	143	13.1
00:05:00	217.183	33.3813	12	31.457	35.643	1900-01-06 12:00:00	144	14.8
00:10:00	217.183	33.3719	12.0833	31.509	35.67	1900-01-06 13:00:00	145	16.9
00:15:00	217.41	33.4118	12.1667	31.535	35.725	1900-01-06 14:00:00	146	18.1
00:20:00	217.399	33.4071	12.25	31.561	35.753	1900-01-06 15:00:00	147	19.2
00:25:00	216.246	33.2452	12.3333	31.613	35.753	1900-01-06 16:00:00	148	20
00:30:00	214.845	33.0364	12.4167	31.639	35.725	1900-01-06 17:00:00	149	20
00:35:00	214.91	33.0481	12.5	31.613	35.725	1900-01-06 18:00:00	150	18.9
00:40:00	214.802	33.0364	12.5833	31.613	35.698	1900-01-06 19:00:00	151	16.7
00:45:00	215.201	33.088	12.6667	31.613	35.725	1900-01-06 20:00:00	152	15.8
00:50:00	215.373	33.1162	12.75	31.639	35.753	1900-01-06 21:00:00	153	14.2
00:55:00	215.761	33.1818	12.8333	31.639	35.753	1900-01-06 22:00:00	154	13.6
01:00:00	215.696	33.1678	12.9167	31.665	35.78	1900-01-06 23:00:00	155	13.4
01:05:00	215.308	33.1091	13	31.665	35.78	1900-01-07	156	13.4
01:10:00	215.308	33.1115	13.0833	31.691	35.808	1900-01-07 01:00:00	157	13.6
01:15:00	215.201	33.0927	13.1667	31.717	35.808	1900-01-07 02:00:00	158	13.4
01:20:00	215.319	33.1162	13.25	31.717	35.835	1900-01-07 03:00:00	159	12.8
01:25:00	215.567	33.1467	13.3333	31.743	35.835	1900-01-07 04:00:00	160	12.7
01:30:00	215.675	33.1654	13.4167	31.743	35.863	1900-01-07 05:00:00	161	11.8
01:35:00	215.233	33.1044	13.5	31.769	35.863	1900-01-07 06:00:00	162	10.9
01:40:00	215.427	33.1302	13.5833	31.769	35.89	1900-01-07 07:00:00	163	10.2
01:45:00	216.084	33.2264	13.6667	31.795	35.945	1900-01-07 08:00:00	164	10.8
01:50:00	216.041	33.2217	13.75	31.821	35.945	1900-01-07 09:00:00	165	11
01:55:00	215.998	33.2194	13.8333	31.848	35.973	1900-01-07 10:00:00	166	11.8
02:00:00	216.106	33.2264	13.9167	31.874	36	1900-01-07 11:00:00	167	14.6
02:05:00	215.901	33.1983	14	31.9	36.028	1900-01-07 12:00:00	168	16.2
02:10:00	215.858	33.1983	14.0833	31.9	36.028	1900-01-07 13:00:00	169	16.7
02:15:00	215.395	33.1302	14.1667	31.926	36.028	1900-01-07 14:00:00	170	16.8
02:20:00	215.632	33.1607	14.25	31.952	36.055	1900-01-07 15:00:00	171	16.4
02:25:00	216.246	33.2452	14.3333	31.952	36.083	1900-01-07 16:00:00	172	16.2
02:30:00	216.203	33.2452	14.4167	31.978	36.111	1900-01-07 17:00:00	173	15.8
02:35:00	216.17	33.2382	14.5	31.978	36.138	1900-01-07 18:00:00	174	15.1
02:40:00	216.063	33.2264	14.5833	32.004	36.138	1900-01-07 19:00:00	175	14.7
02:45:00	216.601	33.2968	14.6667	32.03	36.166	1900-01-07 20:00:00	176	14.5
02:50:00	216.709	33.3156	14.75	32.057	36.193	1900-01-07 21:00:00	177	14
02:55:00	216.591	33.2968	14.8333	32.083	36.221	1900-01-07 22:00:00	178	13.8
03:00:00	216.979	33.3555	14.9167	32.109	36.276	1900-01-07 23:00:00	179	13.3
03:05:00	216.946	33.3484	15	32.135	36.276	1900-01-08	180	13.7
03:10:00	216.892	33.339	15.0833	32.161	36.304	1900-01-08 01:00:00	181	13.3
03:15:00	216.871	33.339	15.1667	32.161	36.304	1900-01-08 02:00:00	182	13.2
03:20:00	216.698	33.3132	15.25	32.214	36.36	1900-01-08 03:00:00	183	12.7
03:25:00	216.612	33.2968	15.3333	32.214	36.36	1900-01-08 04:00:00	184	12.2
03:30:00	216.623	33.3039	15.4167	32.214	36.36	1900-01-08 05:00:00	185	12.8
03:35:00	216.72	33.3132	15.5	32.24	36.387	1900-01-08 06:00:00	186	12.6
03:40:00	216.698	33.3156	15.5833	32.266	36.415	1900-01-08 07:00:00	187	11.5
03:45:00	216.871	33.3344	15.6667	32.292	36.443	1900-01-08 08:00:00	188	10.8
03:50:00	216.774	33.3203	15.75	32.292	36.443	1900-01-08 09:00:00	189	11.5
03:55:00	216.936	33.3484	15.8333	32.319	36.47	1900-01-08 10:00:00	190	11.9
04:00:00	217	33.3531	15.9167	32.345	36.498	1900-01-08 11:00:00	191	13
04:05:00	217.129	33.3719	16	32.371	36.526	1900-01-08 12:00:00	192	13.9
04:10:00	217.291	33.3907	16.0833	32.371	36.554
04:15:00	216.731	33.3132	16.1667	32.397	36.554
04:20:00	216.688	33.3132	16.25	32.424	36.554
04:25:00	216.558	33.2851	16.3333	32.424	36.554
04:30:00	216.569	33.2874	16.4167	32.45	36.582
04:35:00	216.58	33.2992	16.5	32.45	36.582
04:40:00	216.44	33.2734	16.5833	32.45	36.609
04:45:00	216.58	33.2921	16.6667	32.476	36.609
04:50:00	216.688	33.2992	16.75	32.476	36.637
04:55:00	216.591	33.2945	16.8333	32.502	36.637
05:00:00	216.203	33.2382	16.9167	32.502	36.637
05:05:00	216.397	33.271	17	32.529	36.637
05:10:00	216.418	33.2663	17.0833	32.529	36.665
05:15:00	216.203	33.2358	17.1667	32.529	36.665
05:20:00	216.149	33.2311	17.25	32.555	36.693
05:25:00	216.591	33.2968	17.3333	32.555	36.693
05:30:00	216.774	33.3179	17.4167	32.581	36.721
05:35:00	216.58	33.2874	17.5	32.581	36.749
05:40:00	216.041	33.2123	17.5833	32.608	36.721
05:45:00	215.976	33.2123	17.6667	32.608	36.721
05:50:00	215.739	33.1748	17.75	32.608	36.721
05:55:00	215.653	33.1537	17.8333	32.634	36.749
06:00:00	215.491	33.1302	17.9167	32.634	36.721
06:05:00	216.192	33.2335	18	32.634	36.749
06:10:00	216.451	33.2734	18.0833	32.634	36.776
06:15:00	216.429	33.2734	18.1667	32.66	36.776
06:20:00	216.3	33.2499	18.25	32.687	36.804
06:25:00	216.375	33.2616	18.3333	32.687	36.832
06:30:00	216.645	33.2992	18.4167	32.713	36.832
06:35:00	216.806	33.3273	18.5	32.713	36.86
06:40:00	216.601	33.2921	18.5833	32.74	36.888
06:45:00	216.655	33.3039	18.6667	32.766	36.888
06:50:00	216.504	33.2734	18.75	32.766	36.916
06:55:00	216.02	33.2123	18.8333	32.792	36.916
07:00:00	216.558	33.2874	18.9167	32.792	36.916
07:05:00	216.828	33.3203	19	32.792	36.944
07:10:00	216.666	33.3039	19.0833	32.819	36.944
07:15:00	216.591	33.2945	19.1667	32.845	36.972
07:20:00	216.698	33.3015	19.25	32.845	37
07:25:00	216.203	33.2358	19.3333	32.872	37
07:30:00	216.203	33.2358	19.4167	32.872	37
07:35:00	216.052	33.2053	19.5	32.872	37
07:40:00	215.265	33.0974	19.5833	32.872	36.972
07:45:00	215.556	33.1349	19.6667	32.872	36.972
07:50:00	215.459	33.1255	19.75	32.872	36.972
07:55:00	215.47	33.1255	19.8333	32.872	36.972
08:00:00	215.308	33.0974	19.9167	32.872	36.972
08:05:00	215.384	33.1138	20	32.898	36.972
08:10:00	215.427	33.1208	20.0833	32.898	37
08:15:00	215.265	33.0974	20.1667	32.898	37
08:20:00	214.78	33.0317	20.25	32.898	36.972
08:25:00	214.586	32.9988	20.3333	32.898	36.972
08:30:00	214.834	33.027	20.4167	32.898	36.972
08:35:00	214.252	32.9425	20.5	32.898	36.972
08:40:00	214.371	32.9707	20.5833	32.898	36.972
08:45:00	214.576	32.9918	20.6667	32.898	36.972
08:50:00	214.338	32.966	20.75	32.898	36.972
08:55:00	213.95	32.905	20.8333	32.898	36.944
09:00:00	214.209	32.9496	20.9167	32.898	36.972
09:05:00	214.166	32.9425	21	32.898	36.972
09:10:00	213.713	32.8722	21.0833	32.898	36.944
09:15:00	213.595	32.8534	21.1667	32.898	36.944
09:20:00	213.164	32.7924	21.25	32.898	36.916
09:25:00	213.369	32.8205	21.3333	32.898	36.916
09:30:00	213.66	32.8604	21.4167	32.898	36.944
09:35:00	212.948	32.7666	21.5	32.898	36.916
09:40:00	212.83	32.7384	21.5833	32.898	36.916
09:45:00	212.797	32.7431	21.6667	32.872	36.888
09:50:00	213.045	32.7807	21.75	32.872	36.916
09:55:00	213.444	32.8299	21.8333	32.872	36.916
10:00:00	213.282	32.8112	21.9167	32.898	36.916
10:05:00	212.938	32.7619	22	32.898	36.916
10:10:00	212.916	32.776	22.0833	32.898	36.916
10:15:00	212.754	32.7408	22.1667	32.898	36.916
10:20:00	212.647	32.7197	22.25	32.898	36.888
10:25:00	212.765	32.7337	22.3333	32.898	36.916
10:30:00	212.894	32.7572	22.4167	32.898	36.916
10:35:00	212.711	32.7314	22.5	32.898	36.916
10:40:00	213.649	32.8628	22.5833	32.898	36.944
10:45:00	215.815	33.1772	22.6667	32.898	37.028
10:50:00	215.513	33.142	22.75	32.951	37.056
10:55:00	215.621	33.1467	22.8333	32.977	37.084
11:00:00	215.05	33.0692	22.9167	33.004	37.112
11:05:00	214.597	32.9988	23	33.03	37.112
11:10:00	214.554	32.9965	23.0833	33.057	37.14
11:15:00	214.673	33.0153	23.1667	33.057	37.14
11:20:00	214.845	33.0434	23.25	33.083	37.168
11:25:00	214.953	33.0598	23.3333	33.083	37.196
11:30:00	214.382	32.9754	23.4167	33.11	37.168
11:35:00	214.392	32.973	23.5	33.11	37.196
11:40:00	214.705	33.0153	23.5833	33.136	37.196
11:45:00	214.802	33.0317	23.6667	33.136	37.196
11:50:00	214.608	33.0059	23.75	33.136	37.224
11:55:00	214.112	32.9191	23.8333	33.163	37.224
12:00:00	214.414	32.973	23.9167	33.163	37.224
12:05:00	214.673	33.0059	24	33.163	37.224
12:10:00	214.91	33.0481	24.0833	33.163	37.252
12:15:00	214.651	33.0153	24.1667	33.189	37.252
12:20:00	214.791	33.027	24.25	33.189	37.28
12:25:00	214.5	32.9871	24.3333	33.216	37.28
12:30:00	214.554	32.9942	24.4167	33.216	37.28
12:35:00	214.586	32.9965	24.5	33.216	37.308
12:40:00	214.769	33.0247	24.5833	33.216	37.308
12:45:00	214.931	33.0505	24.6667	33.242	37.308
12:50:00	214.802	33.0223	24.75	33.242	37.308
12:55:00	214.759	33.0317	24.8333	33.269	37.336
13:00:00	215.017	33.0598	24.9167	33.269	37.365
13:05:00	215.621	33.1537	25	33.295	37.393
13:10:00	215.75	33.1748	25.0833	33.295	37.421
13:15:00	215.427	33.1255	25.1667	33.322	37.421
13:20:00	215.675	33.1678	25.25	33.349	37.449
13:25:00	215.826	33.1795	25.3333	33.349	37.449
13:30:00	215.847	33.1842	25.4167	33.375	37.477
13:35:00	215.901	33.1936	25.5	33.402	37.505
13:40:00	215.987	33.203	25.5833	33.402	37.534
13:45:00	216.3	33.2452	25.6667	33.428	37.562
13:50:00	216.063	33.2241	25.75	33.455	37.562
13:55:00	216.192	33.2335	25.8333	33.455	37.59
14:00:00	216.03	33.2147	25.9167	33.482	37.59
14:05:00	216.181	33.2358	26	33.508	37.618
14:10:00	216.181	33.2335	26.0833	33.508	37.618
14:15:00	216.138	33.2288	26.1667	33.508	37.646
14:20:00	216.58	33.2968	26.25	33.535	37.675
14:25:00	216.526	33.2851	26.3333	33.562	37.703
14:30:00	216.666	33.3039	26.4167	33.562	37.703
14:35:00	216.666	33.2921	26.5	33.588	37.731
14:40:00	216.386	33.264	26.5833	33.588	37.731
14:45:00	216.688	33.2992	26.6667	33.615	37.76
14:50:00	216.407	33.2616	26.75	33.615	37.76
14:55:00	216.321	33.2593	26.8333	33.642	37.76
15:00:00	216.278	33.2452	26.9167	33.642	37.76
15:05:00	216.321	33.2546	27	33.642	37.788
15:10:00	216.429	33.2757	27.0833	33.668	37.788
15:15:00	216.839	33.325	27.1667	33.668	37.816
15:20:00	217	33.3484	27.25	33.695	37.845
15:25:00	216.709	33.3203	27.3333	33.695	37.845
15:30:00	216.591	33.2968	27.4167	33.722	37.845
15:35:00	216.795	33.3203	27.5	33.722	37.873
15:40:00	216.882	33.332	27.5833	33.748	37.901
15:45:00	216.494	33.2804	27.6667	33.748	37.873
15:50:00	216.418	33.271	27.75	33.775	37.901
15:55:00	216.569	33.2874	27.8333	33.775	37.901
16:00:00	216.688	33.2992	27.9167	33.775	37.901
16:05:00	216.397	33.2616	28	33.775	37.901
16:10:00	216.052	33.21	28.0833	33.802	37.93
16:15:00	215.901	33.1889	28.1667	33.802	37.901
16:20:00	215.879	33.1865	28.25	33.802	37.93
16:25:00	216.278	33.2429	28.3333	33.802	37.93
16:30:00	216.117	33.2241	28.4167	33.802	37.93
16:35:00	216.278	33.2452	28.5	33.829	37.958
16:40:00	216.354	33.2569	28.5833	33.829	37.958
16:45:00	215.836	33.1842	28.6667	33.829	37.958
16:50:00	215.966	33.1936	28.75	33.829	37.958
16:55:00	215.933	33.1912	28.8333	33.829	37.958
17:00:00	215.75	33.1725	28.9167	33.855	37.958
17:05:00	215.448	33.1255	29	33.855	37.958
17:10:00	215.718	33.1725	29.0833	33.855	37.958
17:15:00	215.955	33.1983	29.1667	33.855	37.958
17:20:00	215.729	33.1701	29.25	33.855	37.986
17:25:00	215.804	33.1701	29.3333	33.855	37.958
17:30:00	215.448	33.1279	29.4167	33.855	37.958
17:35:00	215.502	33.1279	29.5	33.855	37.958
17:40:00	215.513	33.1279	29.5833	33.882	37.986
17:45:00	215.621	33.156	29.6667	33.882	37.986
17:50:00	215.254	33.0997	29.75	33.882	37.986
17:55:00	214.802	33.0317	29.8333	33.882	37.958
18:00:00	214.597	33.0059	29.9167	33.882	37.958
18:05:00	214.662	33.0129	30	33.882	37.958
18:10:00	214.22	32.9449	30.0833	33.882	37.93
18:15:00	213.175	32.7994	30.1667	33.855	37.873
18:20:00	214.037	32.9238	30.25	33.855	37.901
18:25:00	214.015	32.912	30.3333	33.829	37.873
18:30:00	213.897	32.8933	30.4167	33.829	37.901
18:35:00	214.015	32.9238	30.5	33.829	37.873
18:40:00	214.274	32.9566	30.5833	33.829	37.901
18:45:00	214.726	33.0176	30.6667	33.829	37.901
18:50:00	214.629	33.0153	30.75	33.829	37.93
18:55:00	214.317	32.959	30.8333	33.855	37.901
19:00:00	214.479	32.9777	30.9167	33.855	37.93
19:05:00	213.541	32.8534	31	33.855	37.901
19:10:00	214.349	32.966	31.0833	33.855	37.901
19:15:00	214.263	32.9613	31.1667	33.855	37.901
19:20:00	213.843	32.8909	31.25	33.882	37.901
19:25:00	214.069	32.9285	31.3333	33.855	37.901
19:30:00	214.263	32.959	31.4167	33.855	37.93
19:35:00	214.123	32.9332	31.5	33.882	37.93
19:40:00	214.047	32.9261	31.5833	33.855	37.93
19:45:00	214.252	32.9543	31.6667	33.882	37.93
19:50:00	214.263	32.959	31.75	33.882	37.93
19:55:00	214.188	32.9425	31.8333	33.882	37.958
20:00:00	214.338	32.9637	31.9167	33.882	37.958
20:05:00	214.511	32.9918	32	33.909	37.958
20:10:00	214.349	32.9683	32.0833	33.909	37.958
20:15:00	214.36	32.966	32.1667	33.909	37.958
20:20:00	214.134	32.9425	32.25	33.909	37.958
20:25:00	214.403	32.973	32.3333	33.909	37.986
20:30:00	214.317	32.9613	32.4167	33.936	37.986
20:35:00	214.511	32.9824	32.5	33.936	37.986
20:40:00	214.565	32.9965	32.5833	33.936	37.986
20:45:00	215.114	33.0763	32.6667	33.936	38.015
20:50:00	215.147	33.081	32.75	33.962	38.043
20:55:00	215.233	33.0903	32.8333	33.962	38.072
21:00:00	215.179	33.088	32.9167	33.989	38.072
21:05:00	214.974	33.0505	33	33.989	38.1
21:10:00	214.769	33.0293	33.0833	34.016	38.1
21:15:00	214.823	33.034	33.1667	34.016	38.1
21:20:00	215.157	33.0903	33.25	34.016	38.1
21:25:00	215.06	33.0692	33.3333	34.043	38.1
21:30:00	215.244	33.0974	33.4167	34.043	38.129
21:35:00	215.33	33.1115	33.5	34.043	38.129
21:40:00	215.933	33.1983	33.5833	34.07	38.157
21:45:00	215.772	33.1701	33.6667	34.07	38.186
21:50:00	215.384	33.1138	33.75	34.097	38.186
21:55:00	215.976	33.2006	33.8333	34.097	38.214
22:00:00	216.117	33.217	33.9167	34.123	38.243
22:05:00	216.267	33.2429	34	34.123	38.271
22:10:00	216.149	33.2241	34.0833	34.15	38.271
22:15:00	216.494	33.278	34.1667	34.15	38.3
22:20:00	216.504	33.278	34.25	34.177	38.3
22:25:00	216.666	33.3015	34.3333	34.204	38.328
22:30:00	216.774	33.3156	34.4167	34.204	38.357
22:35:00	216.634	33.2945	34.5	34.231	38.357
22:40:00	216.709	33.3015	34.5833	34.231	38.385
22:45:00	216.763	33.3109	34.6667	34.258	38.385
22:50:00	217.259	33.386	34.75	34.285	38.414
22:55:00	214.963	33.0481	34.8333	34.285	38.385
23:00:00	214.856	33.0317	34.9167	34.285	38.357
23:05:00	214.619	32.9965	35	34.258	38.328
23:10:00	214.619	32.9965	35.0833	34.258	38.328
23:15:00	214.823	33.0317	35.1667	34.258	38.328
23:20:00	215.017	33.0645	35.25	34.231	38.328
23:25:00	215.201	33.081	35.3333	34.231	38.328
23:30:00	215.254	33.0857	35.4167	34.231	38.328
23:35:00	215.427	33.1185	35.5	34.258	38.328
23:40:00	215.858	33.1701	35.5833	34.258	38.357
23:45:00	215.772	33.1678	35.6667	34.258	38.357
23:50:00	216.16	33.2288	35.75	34.285	38.385
23:55:00	216.461	33.271	35.8333	34.285	38.414
00:00:00	216.354	33.2569	35.9167	34.312	38.414
00:05:00	216.645	33.2921	36	34.312	38.442
00:10:00	216.02	33.2006	36.0833	34.339	38.442
00:15:00	216.073	33.2264	36.1667	34.339	38.471
00:20:00	216.504	33.271	36.25	34.339	38.471
00:25:00	216.364	33.2569	36.3333	34.365	38.5
00:30:00	216.278	33.2429	36.4167	34.365	38.471
00:35:00	216.451	33.2663	36.5	34.365	38.5
00:40:00	216.645	33.2921	36.5833	34.392	38.528
00:45:00	216.623	33.2874	36.6667	34.392	38.528
00:50:00	216.849	33.3273	36.75	34.419	38.557
00:55:00	217.076	33.3555	36.8333	34.419	38.586
01:00:00	216.968	33.3437	36.9167	34.446	38.586
01:05:00	216.925	33.3297	37	34.446	38.614
01:10:00	217.032	33.3437	37.0833	34.473	38.614
01:15:00	217.097	33.3578	37.1667	34.473	38.643
01:20:00	217.237	33.3813	37.25	34.5	38.643
01:25:00	217.183	33.3719	37.3333	34.5	38.643
01:30:00	217.022	33.3461	37.4167	34.5	38.643
01:35:00	216.957	33.3367	37.5	34.527	38.672
01:40:00	214.931	33.0458	37.5833	34.527	38.614
01:45:00	214.586	32.9895	37.6667	34.527	38.586
01:50:00	214.651	33.0035	37.75	34.5	38.586
01:55:00	214.705	33.0129	37.8333	34.473	38.557
02:00:00	214.899	33.0434	37.9167	34.473	38.528
02:05:00	214.942	33.0481	38	34.473	38.528
02:10:00	214.608	32.9988	38.0833	34.446	38.528
02:15:00	214.338	32.9613	38.1667	34.446	38.5
02:20:00	214.317	32.959	38.25	34.446	38.5
02:25:00	214.414	32.9683	38.3333	34.419	38.5
02:30:00	214.36	32.9683	38.4167	34.419	38.471
02:35:00	214.511	32.9848	38.5	34.419	38.471
02:40:00	214.716	33.02	38.5833	34.419	38.471
02:45:00	214.683	33.0176	38.6667	34.419	38.471
02:50:00	214.64	33.0035	38.75	34.419	38.5
02:55:00	214.759	33.0153	38.8333	34.419	38.5
03:00:00	215.125	33.0669	38.9167	34.419	38.5
03:05:00	214.92	33.0411	39	34.419	38.5
03:10:00	214.554	32.9895	39.0833	34.446	38.5
03:15:00	214.371	32.9683	39.1667	34.446	38.5
03:20:00	214.414	32.966	39.25	34.446	38.5
03:25:00	214.705	33.0059	39.3333	34.446	38.5
03:30:00	214.597	32.9942	39.4167	34.446	38.5
03:35:00	214.759	33.0223	39.5	34.446	38.5
03:40:00	214.748	33.0153	39.5833	34.446	38.528
03:45:00	214.716	33.0129	39.6667	34.446	38.528
03:50:00	214.78	33.02	39.75	34.446	38.528
03:55:00	214.802	33.0247	39.8333	34.446	38.528
04:00:00	214.791	33.0247	39.9167	34.446	38.528
04:05:00	214.543	32.9848	40	34.446	38.528
04:10:00	214.123	32.9285	40.0833	34.473	38.5
04:15:00	214.091	32.9191	40.1667	34.473	38.5
04:20:00	214.101	32.9285	40.25	34.446	38.5
04:25:00	213.627	32.8557	40.3333	34.446	38.5
04:30:00	213.843	32.8792	40.4167	34.446	38.5
04:35:00	214.123	32.9238	40.5	34.446	38.5
04:40:00	214.015	32.912	40.5833	34.446	38.5
04:45:00	213.95	32.9027	40.6667	34.446	38.5
04:50:00	213.897	32.8909	40.75	34.446	38.471
04:55:00	213.821	32.8792	40.8333	34.446	38.5
05:00:00	213.315	32.8065	40.9167	34.446	38.471
05:05:00	213.466	32.8346	41	34.446	38.471
05:10:00	213.024	32.7736	41.0833	34.419	38.442
05:15:00	213.153	32.7877	41.1667	34.419	38.442
05:20:00	212.657	32.7126	41.25	34.419	38.414
05:25:00	213.024	32.7689	41.3333	34.419	38.414
05:30:00	215.201	33.0763	41.4167	34.419	38.5
05:35:00	215.179	33.0927	41.5	34.419	38.5
05:40:00	214.91	33.0458	41.5833	34.446	38.528
05:45:00	214.651	33.0059	41.6667	34.473	38.528
05:50:00	214.425	32.9824	41.75	34.473	38.528
05:55:00	214.144	32.9261	41.8333	34.473	38.528
06:00:00	214.349	32.9543	41.9167	34.473	38.557
06:05:00	214.522	32.9754	42	34.473	38.557
06:10:00	214.037	32.9027	42.0833	34.5	38.557
06:15:00	214.285	32.9449	42.1667	34.5	38.557
06:20:00	214.091	32.912	42.25	34.5	38.557
06:25:00	213.25	32.7971	42.3333	34.5	38.528
06:30:00	213.444	32.8346	42.4167	34.5	38.528
06:35:00	213.53	32.8252	42.5	34.473	38.528
06:40:00	212.797	32.729	42.5833	34.473	38.5
06:45:00	212.28	32.6657	42.6667	34.473	38.471
06:50:00	212.334	32.668	42.75	34.473	38.471
06:55:00	212.129	32.6258	42.8333	34.446	38.442
07:00:00	211.881	32.6117	42.9167	34.446	38.414
07:05:00	214.22	32.9355	43	34.419	38.471
07:10:00	213.692	32.8557	43.0833	34.446	38.471
07:15:00	212.97	32.7455	43.1667	34.446	38.471
07:20:00	212.086	32.6422	43.25	34.446	38.442
07:25:00	212.086	32.6328	43.3333	34.446	38.442
07:30:00	211.58	32.5531	43.4167	34.419	38.414
07:35:00	211.634	32.5695	43.5	34.419	38.385
07:40:00	213.724	32.8768	43.5833	34.392	38.442
07:45:00	213.994	32.912	43.6667	34.392	38.442
07:50:00	214.091	32.9214	43.75	34.419	38.5
07:55:00	213.422	32.8158	43.8333	34.446	38.5
08:00:00	212.614	32.7314	43.9167	34.473	38.471
08:05:00	212.83	32.7408	44	34.446	38.471
08:10:00	212.776	32.7361	44.0833	34.446	38.471
08:15:00	212.765	32.729	44.1667	34.446	38.471
08:20:00	212.442	32.6727	44.25	34.446	38.442
08:25:00	211.795	32.5812	44.3333	34.446	38.442
08:30:00	211.558	32.5531	44.4167	34.446	38.414
08:35:00	211.041	32.4663	44.5	34.419	38.385
08:40:00	211.332	32.5085	44.5833	34.419	38.385
08:45:00	210.922	32.4545	44.6667	34.392	38.357
08:50:00	211.224	32.4944	44.75	34.392	38.357
08:55:00	211.407	32.5367	44.8333	34.365	38.328
09:00:00	211.774	32.5836	44.9167	34.365	38.357
09:05:00	210.976	32.485	45	34.365	38.328
09:10:00	211.17	32.478	45.0833	34.365	38.328
09:15:00	211.289	32.5155	45.1667	34.365	38.328
09:20:00	211.741	32.5883	45.25	34.365	38.357
09:25:00	211.009	32.478	45.3333	34.365	38.3
09:30:00	211.019	32.4733	45.4167	34.365	38.328
09:35:00	210.847	32.4545	45.5	34.365	38.328
09:40:00	210.912	32.4475	45.5833	34.365	38.328
09:45:00	210.89	32.4569	45.6667	34.339	38.3
09:50:00	210.879	32.4522	45.75	34.339	38.3
09:55:00	210.664	32.4358	45.8333	34.339	38.271
10:00:00	211.062	32.485	45.9167	34.339	38.3
10:05:00	211.386	32.5273	46	34.339	38.3
10:10:00	211.698	32.5742	46.0833	34.339	38.328
10:15:00	211.321	32.5202	46.1667	34.365	38.328
10:20:00	211.795	32.5789	46.25	34.365	38.357
10:25:00	211.709	32.5812	46.3333	34.365	38.357
10:30:00	211.644	32.5695	46.4167	34.365	38.357
10:35:00	210.955	32.4616	46.5	34.392	38.328
10:40:00	211.256	32.5062	46.5833	34.365	38.357
10:45:00	210.89	32.4545	46.6667	34.365	38.328
10:50:00	211.935	32.607	46.75	34.392	38.357
10:55:00	212.022	32.6211	46.8333	34.392	38.385
11:00:00	211.784	32.5789	46.9167	34.392	38.357
11:05:00	211.666	32.5672	47	34.392	38.385
11:10:00	211.677	32.5648	47.0833	34.392	38.385
11:15:00	211.892	32.5906	47.1667	34.419	38.385
11:20:00	211.547	32.5531	47.25	34.419	38.385
11:25:00	211.407	32.5273	47.3333	34.419	38.385
11:30:00	211.655	32.5578	47.4167	34.419	38.385
11:35:00	211.709	32.5718	47.5	34.419	38.385
11:40:00	211.72	32.5812	47.5833	34.419	38.414
11:45:00	211.677	32.5718	47.6667	34.419	38.414
11:50:00	211.849	32.5836	47.75	34.446	38.414
11:55:00	211.752	32.5836	47.8333	34.419	38.414
12:00:00	212.636	32.7079	47.9167	34.446	38.442
12:05:00	213.056	32.776	48	34.446	38.471
12:10:00	213.218	32.8041	48.0833	34.473	38.5
12:15:00	212.948	32.7455	48.1667	34.5	38.5
12:20:00	212.765	32.722	48.25	34.5	38.528
12:25:00	212.787	32.7173	48.3333	34.527	38.528
12:30:00	212.862	32.7431	48.4167	34.527	38.528
12:35:00	212.28	32.6633	48.5	34.527	38.528
12:40:00	212.894	32.7431	48.5833	34.527	38.557
12:45:00	212.625	32.7079	48.6667	34.554	38.557
12:50:00	212.808	32.7243	48.75	34.554	38.557
12:55:00	213.045	32.7713	48.8333	34.554	38.586
13:00:00	213.013	32.7572	48.9167	34.581	38.586
13:05:00	212.819	32.7243	49	34.581	38.614
13:10:00	212.453	32.6798	49.0833	34.581	38.586
13:15:00	213.067	32.7666	49.1667	34.608	38.614
13:20:00	212.991	32.7619	49.25	34.608	38.614
13:25:00	212.571	32.6892	49.3333	34.608	38.614
13:30:00	213.045	32.7666	49.4167	34.608	38.643
13:35:00	213.11	32.7619	49.5	34.608	38.643
13:40:00	213.132	32.7736	49.5833	34.635	38.643
13:45:00	212.959	32.7642	49.6667	34.635	38.643
13:50:00	213.412	32.8229	49.75	34.635	38.672
13:55:00	213.778	32.8675	49.8333	34.662	38.7
14:00:00	213.39	32.8135	49.9167	34.662	38.7
14:05:00	213.584	32.8417	50	34.689	38.729
14:10:00	213.713	32.8628	50.0833	34.689	38.729
14:15:00	213.293	32.8018	50.1667	34.689	38.729
14:20:00	213.466	32.8205	50.25	34.717	38.758
14:25:00	213.379	32.8135	50.3333	34.717	38.729
14:30:00	214.101	32.9073	50.4167	34.717	38.758
14:35:00	213.854	32.8792	50.5	34.717	38.758
14:40:00	213.422	32.8018	50.5833	34.744	38.787
14:45:00	213.864	32.8768	50.6667	34.744	38.787
14:50:00	213.304	32.7947	50.75	34.744	38.787
14:55:00	213.509	32.8323	50.8333	34.771	38.787
15:00:00	213.875	32.8839	50.9167	34.771	38.816
15:05:00	213.724	32.8698	51	34.771	38.816
15:10:00	214.123	32.9167	51.0833	34.771	38.816
15:15:00	214.565	32.9848	51.1667	34.771	38.844
15:20:00	215.308	33.0974	51.25	34.798	38.902
15:25:00	215.481	33.1185	51.3333	34.825	38.931
15:30:00	215.33	33.0857	51.4167	34.852	38.96
15:35:00	215.147	33.0622	51.5	34.879	38.96
15:40:00	216.127	33.1912	51.5833	34.879	39.017
15:45:00	216.117	33.2077	51.6667	34.906	39.017
15:50:00	216.063	33.1842	51.75	34.933	39.046
15:55:00	216.354	33.2288	51.8333	34.961	39.075
16:00:00	216.17	33.2147	51.9167	34.988	39.104
16:05:00	215.976	33.1818	52	34.988	39.104
16:10:00	215.987	33.1959	52.0833	35.015	39.133
16:15:00	216.483	33.2546	52.1667	35.015	39.162
16:20:00	216.504	33.2499	52.25	35.042	39.162
16:25:00	216.418	33.2522	52.3333	35.069	39.191
16:30:00	216.127	33.1983	52.4167	35.069	39.22
16:35:00	216.364	33.2475	52.5	35.096	39.22
16:40:00	216.44	33.2429	52.5833	35.096	39.22
16:45:00	216.461	33.2593	52.6667	35.124	39.249
16:50:00	216.321	33.2264	52.75	35.124	39.249
16:55:00	216.849	33.3085	52.8333	35.124	39.278
17:00:00	216.871	33.3179	52.9167	35.151	39.278
17:05:00	216.289	33.2194	53	35.178	39.307
17:10:00	216.494	33.264	53.0833	35.178	39.307
17:15:00	215.588	33.1208	53.1667	35.178	39.278
17:20:00	215.793	33.1631	53.25	35.178	39.278
17:25:00	216.386	33.2382	53.3333	35.178	39.307
17:30:00	216.009	33.1725	53.4167	35.178	39.307
17:35:00	215.912	33.1725	53.5	35.178	39.307
17:40:00	215.47	33.0997	53.5833	35.205	39.307
17:45:00	215.071	33.0411	53.6667	35.178	39.278
17:50:00	214.888	33.0176	53.75	35.178	39.278
17:55:00	214.683	32.9918	53.8333	35.178	39.249
18:00:00	214.963	33.027	53.9167	35.178	39.249
18:05:00	214.576	32.9754	54	35.178	39.22
18:10:00	214.435	32.9613	54.0833	35.151	39.22
18:15:00	213.422	32.8346	54.1667	35.151	39.191
18:20:00	217.173	33.3484	54.25	35.151	39.278
18:25:00	216.828	33.3015	54.3333	35.151	39.278
18:30:00	216.882	33.3109	54.4167	35.178	39.336
18:35:00	216.688	33.2804	54.5	35.205	39.365
18:40:00	216.774	33.2921	54.5833	35.233	39.365
18:45:00	216.548	33.264	54.6667	35.26	39.394
18:50:00	216.461	33.2522	54.75	35.26	39.394
18:55:00	216.149	33.2053	54.8333	35.26	39.394
19:00:00	216.095	33.1936	54.9167	35.287	39.394
19:05:00	216.117	33.2077	55	35.287	39.394
19:10:00	215.804	33.1513	55.0833	35.287	39.394
19:15:00	216.127	33.2006	55.1667	35.287	39.394
19:20:00	216.03	33.2006	55.25	35.287	39.394
19:25:00	216.009	33.1842	55.3333	35.315	39.423
19:30:00	216.591	33.2663	55.4167	35.287	39.423
19:35:00	216.795	33.2968	55.5	35.315	39.452
19:40:00	217.086	33.3414	55.5833	35.315	39.452
19:45:00	217.248	33.3602	55.6667	35.342	39.51
19:50:00	217.022	33.325	55.75	35.369	39.51
19:55:00	217.162	33.3484	55.8333	35.369	39.51
20:00:00	217.561	33.4094	55.9167	35.369	39.539
20:05:00	217.528	33.3977	56	35.396	39.568
20:10:00	215.33	33.0903	56.0833	35.396	39.51
20:15:00	215.319	33.088	56.1667	35.424	39.51
20:20:00	215.276	33.0739	56.25	35.396	39.481
20:25:00	215.588	33.1208	56.3333	35.369	39.481
20:30:00	215.912	33.1631	56.4167	35.369	39.481
20:35:00	216.181	33.2077	56.5	35.369	39.481
20:40:00	215.944	33.1678	56.5833	35.369	39.481
20:45:00	216.698	33.2827	56.6667	35.369	39.51
20:50:00	216.235	33.2077	56.75	35.396	39.51
20:55:00	215.287	33.0645	56.8333	35.396	39.481
21:00:00	215.481	33.1068	56.9167	35.396	39.481
21:05:00	214.866	33.0129	57	35.369	39.452
21:10:00	214.845	33.0059	57.0833	35.369	39.452
21:15:00	215.179	33.0552	57.1667	35.369	39.452
21:20:00	215.201	33.0692	57.25	35.369	39.452
21:25:00	215.459	33.1068	57.3333	35.369	39.452
21:30:00	216.073	33.1865	57.4167	35.369	39.452
21:35:00	215.804	33.1443	57.5	35.369	39.481
21:40:00	215.923	33.1678	57.5833	35.369	39.481
21:45:00	215.89	33.1654	57.6667	35.369	39.481
21:50:00	215.739	33.1279	57.75	35.396	39.51
21:55:00	215.804	33.1513	57.8333	35.396	39.481
22:00:00	215.976	33.1654	57.9167	35.396	39.51
22:05:00	216.429	33.2429	58	35.396	39.539
22:10:00	216.763	33.2827	58.0833	35.424	39.539
22:15:00	216.86	33.3132	58.1667	35.424	39.568
22:20:00	216.882	33.3039	58.25	35.451	39.568
22:25:00	217.108	33.339	58.3333	35.451	39.598
22:30:00	217.302	33.3649	58.4167	35.478	39.627
22:35:00	217.453	33.3883	58.5	35.478	39.627
22:40:00	216.03	33.1865	58.5833	35.506	39.627
22:45:00	215.125	33.0481	58.6667	35.506	39.598
22:50:00	216.084	33.1936	58.75	35.478	39.598
22:55:00	215.772	33.1513	58.8333	35.478	39.568
23:00:00	216.504	33.2522	58.9167	35.478	39.598
23:05:00	217.011	33.3203	59	35.478	39.627
23:10:00	217.356	33.3649	59.0833	35.506	39.656
23:15:00	217.485	33.393	59.1667	35.506	39.685
23:20:00	215.05	33.0458	59.25	35.533	39.598
23:25:00	215.071	33.0434	59.3333	35.533	39.598
23:30:00	214.834	33.0059	59.4167	35.506	39.568
23:35:00	214.629	32.9777	59.5	35.478	39.568
23:40:00	215.104	33.0434	59.5833	35.478	39.568
23:45:00	215.405	33.0997	59.6667	35.478	39.539
23:50:00	215.535	33.1115	59.75	35.478	39.568
23:55:00	215.976	33.1818	59.8333	35.478	39.568
00:00:00	216.041	33.1865	59.9167	35.478	39.598
00:05:00	216.149	33.2006	60	35.478	39.598
00:10:00	216.192	33.21	60.0833	35.506	39.627
00:15:00	216.084	33.1912	60.1667	35.506	39.627
00:20:00	216.364	33.2358	60.25	35.506	39.627
00:25:00	217	33.3226	60.3333	35.533	39.656
00:30:00	217.194	33.3461	60.4167	35.533	39.685
00:35:00	217.129	33.3414	60.5	35.561	39.714
00:40:00	217.194	33.3461	60.5833	35.561	39.714
00:45:00	217.367	33.3742	60.6667	35.588	39.743
00:50:00	217.313	33.3625	60.75	35.588	39.743
00:55:00	217.539	33.4024	60.8333	35.615	39.773
01:00:00	217.474	33.3907	60.9167	35.615	39.773
01:05:00	215.933	33.1654	61	35.643	39.743
01:10:00	214.78	32.9965	61.0833	35.643	39.714
01:15:00	214.673	32.9824	61.1667	35.588	39.685
01:20:00	214.942	33.0223	61.25	35.588	39.656
01:25:00	215.05	33.0411	61.3333	35.561	39.656
01:30:00	215.265	33.0716	61.4167	35.561	39.656
01:35:00	215.276	33.0763	61.5	35.561	39.656
01:40:00	215.319	33.0833	61.5833	35.533	39.627
01:45:00	215.125	33.0528	61.6667	35.561	39.627
01:50:00	215.136	33.0528	61.75	35.561	39.627
01:55:00	215.19	33.0645	61.8333	35.533	39.627
02:00:00	215.524	33.1091	61.9167	35.533	39.627
02:05:00	215.319	33.081	62	35.533	39.627
02:10:00	215.211	33.0598	62.0833	35.533	39.627
02:15:00	215.341	33.0786	62.1667	35.533	39.627
02:20:00	215.254	33.0645	62.25	35.533	39.627
02:25:00	215.384	33.0857	62.3333	35.533	39.627
02:30:00	215.244	33.0645	62.4167	35.533	39.627
02:35:00	215.157	33.0505	62.5	35.533	39.627
02:40:00	215.19	33.0575	62.5833	35.533	39.627
02:45:00	215.222	33.0598	62.6667	35.533	39.627
02:50:00	215.459	33.095	62.75	35.533	39.627
02:55:00	215.233	33.0645	62.8333	35.533	39.627
03:00:00	215.233	33.0622	62.9167	35.533	39.627
03:05:00	215.179	33.0528	63	35.533	39.627
03:10:00	215.308	33.0763	63.0833	35.533	39.627
03:15:00	215.395	33.088	63.1667	35.561	39.656
03:20:00	215.621	33.1185	63.25	35.561	39.627
03:25:00	215.513	33.1044	63.3333	35.561	39.656
03:30:00	215.157	33.0552	63.4167	35.561	39.656
03:35:00	215.427	33.0857	63.5	35.561	39.656
03:40:00	215.513	33.1044	63.5833	35.561	39.656
03:45:00	215.351	33.0857	63.6667	35.561	39.656
03:50:00	215.319	33.0786	63.75	35.561	39.656
03:55:00	215.136	33.0528	63.8333	35.588	39.656
04:00:00	215.222	33.0622	63.9167	35.588	39.656
04:05:00	215.082	33.0505	64	35.561	39.627
04:10:00	215.147	33.0505	64.0833	35.561	39.656
04:15:00	215.05	33.0434	64.1667	35.561	39.656
04:20:00	214.92	33.0247	64.25	35.588	39.656
04:25:00	214.694	32.9918	64.3333	35.561	39.627
04:30:00	214.608	32.9824	64.4167	35.561	39.627
04:35:00	214.856	33.0129	64.5	35.561	39.627
04:40:00	214.673	32.9895	64.5833	35.561	39.627
04:45:00	214.769	33.0012	64.6667	35.561	39.627
04:50:00	214.673	32.9824	64.75	35.561	39.627
04:55:00	214.489	32.9543	64.8333	35.561	39.627
05:00:00	214.22	32.9238	64.9167	35.561	39.627
05:05:00	214.037	32.9073	65	35.561	39.598
05:10:00	214.047	32.8956	65.0833	35.533	39.598
05:15:00	213.897	32.8698	65.1667	35.533	39.568
05:20:00	213.627	32.837	65.25	35.533	39.568
05:25:00	213.487	32.8088	65.3333	35.533	39.539
05:30:00	213.261	32.7713	65.4167	35.506	39.539
05:35:00	213.013	32.7408	65.5	35.506	39.51
05:40:00	213.11	32.7595	65.5833	35.478	39.51
05:45:00	213.433	32.8065	65.6667	35.478	39.481
05:50:00	215.254	33.0739	65.75	35.478	39.539
05:55:00	214.673	32.9801	65.8333	35.478	39.539
06:00:00	215.104	33.0505	65.9167	35.506	39.568
06:05:00	214.888	33.0223	66	35.506	39.568
06:10:00	214.769	32.9965	66.0833	35.533	39.598
06:15:00	214.274	32.9238	66.1667	35.533	39.598
06:20:00	214.338	32.9378	66.25	35.533	39.598
06:25:00	214.037	32.8862	66.3333	35.533	39.568
06:30:00	213.433	32.8182	66.4167	35.533	39.568
06:35:00	213.767	32.8534	66.5	35.533	39.568
06:40:00	212.733	32.7173	66.5833	35.506	39.51
06:45:00	211.418	32.5155	66.6667	35.506	39.452
06:50:00	211.687	32.5554	66.75	35.451	39.423
06:55:00	212.797	32.7056	66.8333	35.451	39.423
07:00:00	214.047	32.8956	66.9167	35.424	39.481
07:05:00	213.897	32.8792	67	35.424	39.481
07:10:00	213.132	32.7713	67.0833	35.451	39.452
07:15:00	213.153	32.7666	67.1667	35.451	39.452
07:20:00	212.636	32.6821	67.25	35.451	39.452
07:25:00	212.722	32.6938	67.3333	35.451	39.452
07:30:00	212.528	32.6751	67.4167	35.424	39.423
07:35:00	212.14	32.6117	67.5	35.424	39.423
07:40:00	212.474	32.6727	67.5833	35.396	39.394
07:45:00	212.593	32.6892	67.6667	35.396	39.394
07:50:00	212.075	32.6164	67.75	35.396	39.394
07:55:00	211.483	32.5249	67.8333	35.396	39.365
08:00:00	211.267	32.4827	67.9167	35.396	39.336
08:05:00	211.106	32.4663	68	35.369	39.307
08:10:00	213.487	32.8065	68.0833	35.342	39.365
08:15:00	213.099	32.7595	68.1667	35.342	39.365
08:20:00	212.916	32.7408	68.25	35.369	39.394
08:25:00	212.938	32.7337	68.3333	35.369	39.394
08:30:00	213.369	32.79	68.4167	35.396	39.423
08:35:00	213.121	32.7525	68.5	35.396	39.423
08:40:00	213.369	32.7947	68.5833	35.396	39.423
08:45:00	213.369	32.7971	68.6667	35.424	39.452
08:50:00	213.078	32.7408	68.75	35.424	39.423
08:55:00	213.164	32.7642	68.8333	35.424	39.452
09:00:00	211.741	32.5648	68.9167	35.424	39.394
09:05:00	211.881	32.6047	69	35.424	39.394
09:10:00	213.735	32.844	69.0833	35.396	39.452
09:15:00	213.843	32.8604	69.1667	35.424	39.452
09:20:00	213.325	32.79	69.25	35.424	39.452
09:25:00	212.841	32.7243	69.3333	35.424	39.452
09:30:00	212.582	32.6962	69.4167	35.451	39.452
09:35:00	212.216	32.6258	69.5	35.451	39.423
09:40:00	212.237	32.6375	69.5833	35.424	39.423
09:45:00	212.517	32.6774	69.6667	35.424	39.423
09:50:00	212.636	32.6962	69.75	35.424	39.423
09:55:00	213.002	32.7478	69.8333	35.424	39.423
10:00:00	213.681	32.8628	69.9167	35.424	39.452
10:05:00	213.261	32.7947	70	35.451	39.481
10:10:00	213.261	32.7853	70.0833	35.451	39.481
10:15:00	213.401	32.7971	70.1667	35.451	39.481
10:20:00	213.045	32.7455	70.25	35.478	39.481
10:25:00	212.894	32.7267	70.3333	35.451	39.481
10:30:00	213.078	32.7666	70.4167	35.478	39.481
10:35:00	213.422	32.7994	70.5	35.478	39.51
10:40:00	212.647	32.6868	70.5833	35.478	39.481
10:45:00	212.517	32.6727	70.6667	35.478	39.481
10:50:00	212.981	32.7408	70.75	35.478	39.481
10:55:00	212.981	32.7478	70.8333	35.478	39.481
11:00:00	212.668	32.6962	70.9167	35.478	39.481
11:05:00	212.388	32.6587	71	35.478	39.481
11:10:00	212.744	32.6962	71.0833	35.478	39.481
11:15:00	212.216	32.6399	71.1667	35.478	39.481
11:20:00	212.334	32.6587	71.25	35.478	39.452
11:25:00	212.42	32.6587	71.3333	35.451	39.452
11:30:00	212.474	32.668	71.4167	35.451	39.452
11:35:00	212.259	32.6422	71.5	35.451	39.452
11:40:00	212.043	32.6	71.5833	35.451	39.452
11:45:00	212.41	32.6493	71.6667	35.451	39.452
11:50:00	212.151	32.6328	71.75	35.451	39.423
11:55:00	212.366	32.654	71.8333	35.451	39.452
12:00:00	212.647	32.7009	71.9167	35.451	39.452
12:05:00	212.366	32.654	72	35.451	39.452
12:10:00	212.733	32.7079	72.0833	35.451	39.481
12:15:00	213.035	32.7431	72.1667	35.478	39.481
12:20:00	212.959	32.7525	72.25	35.478	39.51
12:25:00	213.088	32.7619	72.3333	35.478	39.51
12:30:00	212.938	32.7431	72.4167	35.506	39.51
12:35:00	212.959	32.7384	72.5	35.478	39.51
12:40:00	212.841	32.7243	72.5833	35.506	39.51
12:45:00	213.218	32.776	72.6667	35.506	39.539
12:50:00	213.369	32.783	72.75	35.506	39.539
12:55:00	212.938	32.7197	72.8333	35.533	39.539
13:00:00	212.916	32.7384	72.9167	35.533	39.539
13:05:00	212.841	32.7103	73	35.533	39.539
13:10:00	213.347	32.7689	73.0833	35.533	39.568
13:15:00	213.519	32.8158	73.1667	35.533	39.568
13:20:00	213.8	32.851	73.25	35.533	39.598
13:25:00	213.746	32.8581	73.3333	35.561	39.598
13:30:00	213.735	32.8417	73.4167	35.561	39.627
13:35:00	213.864	32.8534	73.5	35.588	39.627
13:40:00	213.649	32.8182	73.5833	35.588	39.627
13:45:00	213.789	32.851	73.6667	35.588	39.627
13:50:00	213.918	32.8698	73.75	35.588	39.627
13:55:00	214.091	32.898	73.8333	35.615	39.656
14:00:00	214.155	32.905	73.9167	35.615	39.685
14:05:00	214.123	32.9003	74	35.615	39.685
14:10:00	213.563	32.8323	74.0833	35.643	39.685
14:15:00	213.67	32.837	74.1667	35.643	39.685
14:20:00	213.778	32.8604	74.25	35.643	39.685
14:25:00	213.347	32.8018	74.3333	35.643	39.685
14:30:00	214.576	32.9801	74.4167	35.643	39.714
14:35:00	214.963	33.027	74.5	35.643	39.743
14:40:00	214.576	32.966	74.5833	35.67	39.743
14:45:00	214.942	33.0176	74.6667	35.67	39.743
14:50:00	214.888	33.0129	74.75	35.698	39.773
14:55:00	214.996	33.0247	74.8333	35.725	39.802
15:00:00	215.395	33.0833	74.9167	35.725	39.831
15:05:00	215.287	33.0739	75	35.725	39.831
15:10:00	214.985	33.02	75.0833	35.753	39.831
15:15:00	215.104	33.034	75.1667	35.753	39.86
15:20:00	215.244	33.0552	75.25	35.78	39.86
15:25:00	215.621	33.1115	75.3333	35.78	39.89
15:30:00	215.826	33.142	75.4167	35.78	39.89
15:35:00	215.448	33.0857	75.5	35.808	39.919
15:40:00	215.179	33.034	75.5833	35.835	39.919
15:45:00	215.567	33.1021	75.6667	35.835	39.919
15:50:00	216.02	33.1654	75.75	35.835	39.948
15:55:00	216.052	33.1631	75.8333	35.863	39.978
16:00:00	215.89	33.1326	75.9167	35.863	39.978
16:05:00	215.491	33.0857	76	35.89	39.978
16:10:00	215.179	33.0505	76.0833	35.89	39.978
16:15:00	215.804	33.149	76.1667	35.89	39.978
16:20:00	216.224	33.1936	76.25	35.89	40.007
16:25:00	215.933	33.1537	76.3333	35.918	40.036
16:30:00	215.653	33.1255	76.4167	35.918	40.007
16:35:00	215.147	33.034	76.5	35.918	40.007
16:40:00	215.718	33.1255	76.5833	35.918	40.007
16:45:00	215.729	33.1326	76.6667	35.918	40.036
16:50:00	215.923	33.1607	76.75	35.918	40.036
16:55:00	215.933	33.1513	76.8333	35.945	40.036
17:00:00	215.772	33.142	76.9167	35.945	40.036
17:05:00	215.298	33.0763	77	35.945	40.036
17:10:00	215.621	33.1115	77.0833	35.945	40.036
17:15:00	216.03	33.1537	77.1667	35.945	40.066
17:20:00	216.3	33.2053	77.25	35.945	40.066
17:25:00	215.793	33.1373	77.3333	35.973	40.095
17:30:00	215.136	33.034	77.4167	35.973	40.066
17:35:00	215.47	33.0927	77.5	35.973	40.066
17:40:00	215.772	33.1279	77.5833	35.973	40.066
17:45:00	215.966	33.1513	77.6667	35.973	40.095
17:50:00	215.707	33.1232	77.75	35.973	40.095
17:55:00	215.653	33.095	77.8333	36	40.095
18:00:00	215.89	33.1302	77.9167	36	40.095
18:05:00	215.448	33.0739	78	36	40.095
18:10:00	215.384	33.0575	78.0833	36	40.095
18:15:00	214.651	32.9543	78.1667	36	40.066
18:20:00	212.97	32.7243	78.25	36	40.007
18:25:00	213.002	32.7361	78.3333	35.973	39.978
18:30:00	212.797	32.7103	78.4167	35.945	39.948
18:35:00	212.647	32.6892	78.5	35.918	39.919
18:40:00	212.69	32.6798	78.5833	35.89	39.89
18:45:00	212.733	32.6962	78.6667	35.863	39.89
18:50:00	212.636	32.6774	78.75	35.863	39.86
18:55:00	212.571	32.661	78.8333	35.835	39.831
19:00:00	212.248	32.6211	78.9167	35.835	39.831
19:05:00	212.733	32.6915	79	35.808	39.802
19:10:00	212.517	32.661	79.0833	35.808	39.802
19:15:00	212.625	32.6868	79.1667	35.808	39.802
19:20:00	212.668	32.6868	79.25	35.808	39.802
19:25:00	213.045	32.7478	79.3333	35.808	39.802
19:30:00	212.722	32.6938	79.4167	35.808	39.802
19:35:00	213.175	32.7642	79.5	35.808	39.802
19:40:00	213.121	32.7525	79.5833	35.808	39.831
19:45:00	213.078	32.7455	79.6667	35.808	39.802
19:50:00	213.261	32.7666	79.75	35.808	39.831
19:55:00	213.336	32.783	79.8333	35.808	39.831
20:00:00	213.228	32.7666	79.9167	35.808	39.831
20:05:00	213.53	32.7971	80	35.808	39.831
20:10:00	213.681	32.8299	80.0833	35.808	39.831
20:15:00	214.36	32.9285	80.1667	35.835	39.89
20:20:00	214.295	32.9238	80.25	35.835	39.89
20:25:00	214.5	32.9449	80.3333	35.835	39.919
20:30:00	214.209	32.9191	80.4167	35.863	39.919
20:35:00	214.705	32.9824	80.5	35.863	39.948
20:40:00	214.953	33.0082	80.5833	35.863	39.948
20:45:00	215.373	33.088	80.6667	35.89	39.978
20:50:00	215.578	33.1044	80.75	35.918	40.007
20:55:00	215.685	33.1185	80.8333	35.945	40.036
21:00:00	215.696	33.1208	80.9167	35.945	40.036
21:05:00	215.362	33.0716	81	35.973	40.066
21:10:00	215.341	33.0692	81.0833	35.973	40.066
21:15:00	215.416	33.0927	81.1667	35.973	40.066
21:20:00	215.664	33.1208	81.25	36	40.095
21:25:00	215.739	33.1279	81.3333	36	40.095
21:30:00	215.729	33.1302	81.4167	36.028	40.125
21:35:00	215.933	33.1513	81.5	36.028	40.125
21:40:00	215.998	33.1701	81.5833	36.028	40.154
21:45:00	216.073	33.1748	81.6667	36.055	40.154
21:50:00	215.879	33.1513	81.75	36.055	40.154
21:55:00	216.267	33.2077	81.8333	36.083	40.183
22:00:00	216.903	33.2992	81.9167	36.083	40.213
22:05:00	217.248	33.3437	82	36.111	40.242
22:10:00	217.313	33.3578	82.0833	36.111	40.272
22:15:00	217.658	33.4118	82.1667	36.138	40.301
22:20:00	215.405	33.0857	82.25	36.166	40.272
22:25:00	215.028	33.0247	82.3333	36.166	40.242
22:30:00	215.265	33.0598	82.4167	36.138	40.213
22:35:00	215.718	33.1349	82.5	36.138	40.242
22:40:00	215.858	33.1467	82.5833	36.138	40.242
22:45:00	216.451	33.2264	82.6667	36.138	40.242
22:50:00	216.569	33.2429	82.75	36.138	40.272
22:55:00	216.397	33.2241	82.8333	36.166	40.301
23:00:00	217.043	33.3132	82.9167	36.166	40.301
23:05:00	217.183	33.3273	83	36.193	40.331
23:10:00	217.291	33.3531	83.0833	36.193	40.36
23:15:00	215.696	33.1208	83.1667	36.221	40.331
23:20:00	214.813	32.9942	83.25	36.221	40.301
23:25:00	214.791	32.9918	83.3333	36.193	40.272
23:30:00	214.823	32.9965	83.4167	36.193	40.272
23:35:00	214.91	32.9988	83.5	36.166	40.242
23:40:00	214.791	32.9871	83.5833	36.166	40.213
23:45:00	215.201	33.0434	83.6667	36.166	40.242
23:50:00	215.384	33.0739	83.75	36.166	40.242
23:55:00	215.632	33.1091	83.8333	36.166	40.242
00:00:00	215.33	33.0669	83.9167	36.166	40.242
00:05:00	215.556	33.0997	84	36.166	40.242
00:10:00	215.545	33.095	84.0833	36.166	40.242
00:15:00	215.955	33.1537	84.1667	36.166	40.272
00:20:00	215.987	33.1537	84.25	36.166	40.272
00:25:00	215.621	33.1091	84.3333	36.166	40.272
00:30:00	215.524	33.0927	84.4167	36.166	40.272
00:35:00	215.319	33.0622	84.5	36.193	40.272
00:40:00	215.836	33.1326	84.5833	36.193	40.272
00:45:00	216.289	33.2006	84.6667	36.193	40.301
00:50:00	216.418	33.2194	84.75	36.193	40.331
00:55:00	216.44	33.2217	84.8333	36.221	40.331
01:00:00	216.246	33.1936	84.9167	36.221	40.331
01:05:00	216.17	33.1842	85	36.221	40.36
01:10:00	216.224	33.1865	85.0833	36.249	40.36
01:15:00	216.472	33.2311	85.1667	36.249	40.36
01:20:00	216.795	33.2734	85.25	36.249	40.39
01:25:00	216.688	33.2593	85.3333	36.249	40.39
01:30:00	216.86	33.2827	85.4167	36.276	40.419
01:35:00	216.925	33.2898	85.5	36.276	40.419
01:40:00	216.731	33.264	85.5833	36.304	40.419
01:45:00	217.065	33.3109	85.6667	36.304	40.449
01:50:00	216.968	33.2968	85.75	36.304	40.449
01:55:00	216.957	33.2992	85.8333	36.304	40.449
02:00:00	215.114	33.0317	85.9167	36.332	40.419
02:05:00	213.972	32.8651	86	36.332	40.36
02:10:00	214.295	32.9144	86.0833	36.276	40.331
02:15:00	214.209	32.898	86.1667	36.276	40.331
02:20:00	214.209	32.9027	86.25	36.249	40.272
02:25:00	214.004	32.8745	86.3333	36.221	40.272
02:30:00	213.767	32.8393	86.4167	36.221	40.272
02:35:00	213.778	32.837	86.5	36.193	40.242
02:40:00	214.155	32.898	86.5833	36.166	40.213
02:45:00	214.198	32.9003	86.6667	36.166	40.213
02:50:00	214.274	32.9097	86.75	36.166	40.242
02:55:00	214.295	32.9144	86.8333	36.166	40.213
03:00:00	214.511	32.9425	86.9167	36.166	40.242
03:05:00	214.047	32.8768	87	36.166	40.213
03:10:00	213.692	32.8276	87.0833	36.166	40.183
03:15:00	213.897	32.8557	87.1667	36.138	40.183
03:20:00	213.692	32.8299	87.25	36.138	40.183
03:25:00	213.789	32.8393	87.3333	36.138	40.183
03:30:00	213.476	32.7924	87.4167	36.138	40.154
03:35:00	213.466	32.7924	87.5	36.138	40.154
03:40:00	213.045	32.7408	87.5833	36.111	40.125
03:45:00	213.519	32.8018	87.6667	36.111	40.125
03:50:00	213.713	32.8299	87.75	36.083	40.125
03:55:00	213.412	32.7877	87.8333	36.111	40.125
04:00:00	213.336	32.776	87.9167	36.083	40.125
04:05:00	213.002	32.729	88	36.083	40.095
04:10:00	212.668	32.6798	88.0833	36.083	40.095
04:15:00	212.97	32.722	88.1667	36.083	40.066
04:20:00	213.153	32.7478	88.25	36.055	40.095
04:25:00	213.056	32.7314	88.3333	36.055	40.066
04:30:00	212.916	32.7103	88.4167	36.055	40.066
04:35:00	212.83	32.7032	88.5	36.055	40.036
04:40:00	212.754	32.6962	88.5833	36.055	40.036
04:45:00	214.435	32.9332	88.6667	36.028	40.095
04:50:00	215.588	33.095	88.75	36.055	40.154
04:55:00	215.739	33.1232	88.8333	36.083	40.183
05:00:00	215.211	33.0411	88.9167	36.111	40.183
05:05:00	215.168	33.0387	89	36.138	40.213
05:10:00	214.683	32.9683	89.0833	36.138	40.213
05:15:00	214.953	33.0106	89.1667	36.138	40.213
05:20:00	214.963	33.0153	89.25	36.138	40.213
05:25:00	214.22	32.9027	89.3333	36.166	40.213
05:30:00	213.864	32.8557	89.4167	36.166	40.213
05:35:00	214.155	32.8886	89.5	36.138	40.213
05:40:00	213.854	32.8557	89.5833	36.166	40.213
05:45:00	213.444	32.7924	89.6667	36.138	40.183
05:50:00	213.261	32.7689	89.75	36.138	40.154
05:55:00	213.498	32.8135	89.8333	36.138	40.154
06:00:00	214.597	32.9683	89.9167	36.111	40.183
06:05:00	214.565	32.9496	90	36.138	40.183
06:10:00	214.123	32.8933	90.0833	36.138	40.183
06:15:00	213.272	32.776	90.1667	36.138	40.154
06:20:00	213.099	32.7431	90.25	36.138	40.154
06:25:00	213.035	32.7502	90.3333	36.111	40.125
06:30:00	213.035	32.7361	90.4167	36.111	40.125
06:35:00	212.808	32.7079	90.5	36.111	40.125
06:40:00	212.108	32.6	90.5833	36.083	40.066
06:45:00	212.108	32.607	90.6667	36.083	40.066
06:50:00	211.914	32.5789	90.75	36.055	40.036
06:55:00	212.905	32.715	90.8333	36.028	40.036
07:00:00	213.142	32.7619	90.9167	36.028	40.066
07:05:00	212.679	32.6915	91	36.055	40.066
07:10:00	212.28	32.6352	91.0833	36.055	40.036
07:15:00	211.946	32.5789	91.1667	36.055	40.036
07:20:00	212.334	32.6399	91.25	36.028	40.036
07:25:00	211.278	32.4827	91.3333	36.028	39.978
07:30:00	211.429	32.4921	91.4167	36	39.978
07:35:00	212.571	32.6704	91.5	36	39.978
07:40:00	213.95	32.8768	91.5833	35.973	40.036
07:45:00	213.703	32.837	91.6667	36	40.036
07:50:00	213.724	32.844	91.75	36.028	40.066
07:55:00	213.218	32.7642	91.8333	36.028	40.066
08:00:00	212.797	32.7126	91.9167	36.055	40.036
08:05:00	212.453	32.6563	92	36.028	40.036
08:10:00	212.528	32.661	92.0833	36.028	40.036
08:15:00	212.216	32.6188	92.1667	36.028	40.036
08:20:00	212.291	32.6352	92.25	36.028	40.007
08:25:00	212.323	32.6305	92.3333	36.028	40.007
08:30:00	212.496	32.6446	92.4167	36.028	40.007
08:35:00	211.709	32.5531	92.5	36.028	40.007
08:40:00	211.968	32.5742	92.5833	36	39.978
08:45:00	211.343	32.5015	92.6667	36	39.978
08:50:00	211.483	32.5202	92.75	36	39.948
08:55:00	212.129	32.593	92.8333	35.973	39.948
09:00:00	211.192	32.471	92.9167	35.973	39.948
09:05:00	211.494	32.4921	93	35.973	39.948
09:10:00	211.009	32.4498	93.0833	35.945	39.89
09:15:00	211.741	32.5413	93.1667	35.945	39.919
09:20:00	211.483	32.5085	93.25	35.945	39.919
09:25:00	211.278	32.4616	93.3333	35.945	39.89
09:30:00	211.709	32.5413	93.4167	35.945	39.89
09:35:00	211.795	32.5507	93.5	35.945	39.919
09:40:00	212.42	32.6563	93.5833	35.945	39.919
09:45:00	212.474	32.661	93.6667	35.945	39.948
09:50:00	212.496	32.654	93.75	35.973	39.948
09:55:00	212.603	32.6633	93.8333	35.973	39.978
10:00:00	212.463	32.654	93.9167	35.973	39.978
10:05:00	212.183	32.6023	94	35.973	39.978
10:10:00	212.399	32.6469	94.0833	36	39.978
10:15:00	212.075	32.6047	94.1667	36	39.978
10:20:00	212.431	32.6469	94.25	35.973	39.978
10:25:00	212.56	32.6657	94.3333	35.973	39.978
10:30:00	212.679	32.6892	94.4167	36	40.007
10:35:00	212.668	32.6751	94.5	36	40.007
10:40:00	212.377	32.6375	94.5833	36	40.007
10:45:00	212.011	32.5906	94.6667	36	40.007
10:50:00	211.332	32.485	94.75	36	39.948
10:55:00	211.31	32.471	94.8333	36	39.948
11:00:00	211.731	32.539	94.9167	35.973	39.948
11:05:00	212.226	32.6211	95	35.973	39.978
11:10:00	211.806	32.5601	95.0833	35.973	39.948
11:15:00	211.569	32.5132	95.1667	35.973	39.948
11:20:00	211.655	32.532	95.25	35.973	39.948
11:25:00	212.043	32.5906	95.3333	35.973	39.948
11:30:00	212.399	32.6469	95.4167	35.973	39.978
11:35:00	212.075	32.5859	95.5	35.973	39.978
11:40:00	211.591	32.5202	95.5833	35.973	39.948
11:45:00	211.698	32.5437	95.6667	35.973	39.948
11:50:00	211.644	32.5226	95.75	35.973	39.948
11:55:00	212.119	32.5977	95.8333	35.973	39.948
12:00:00	212.442	32.6516	95.9167	35.973	39.978
12:05:00	215.33	27.7669	96	35.973	39.656
12:10:00	231.257	0	96.0833	36	36.055
12:15:00	231.526	0	96.1667	35.015	35.069
12:20:00	231.365	0	96.25	33.508	33.562
12:25:00	231.516	0	96.3333	32.476	32.502
12:30:00	231.139	0	96.4167	31.587	31.613
12:35:00	231.074	0	96.5	30.784	30.81
12:40:00	231.203	0	96.5833	30.116	30.168
12:45:00	230.751	0	96.6667	29.555	29.581
12:50:00	230.934	0	96.75	29.048	29.073
12:55:00	231.117	0	96.8333	28.593	28.618
13:00:00	230.848	0	96.9167	28.19	28.216
13:05:00	230.901	0	97	27.815	27.84
13:10:00	230.988	0	97.0833	27.465	27.49
13:15:00	230.869	0	97.1667	27.166	27.191
13:20:00	230.74	0	97.25	26.868	26.893
13:25:00	230.901	0	97.3333	26.62	26.645
13:30:00	231.559	0	97.4167	26.372	26.397
13:35:00	232.065	0	97.5	26.15	26.175
13:40:00	231.947	0	97.5833	25.928	25.953
13:45:00	231.656	0	97.6667	25.731	25.756
13:50:00	231.656	0	97.75	25.559	25.584
13:55:00	232.151	0	97.8333	25.387	25.387
14:00:00	232.054	0	97.9167	25.216	25.24
14:05:00	231.516	0	98	25.044	25.069
14:10:00	231.332	0	98.0833	24.898	24.922
14:15:00	231.473	0	98.1667	24.751	24.775
14:20:00	230.287	0	98.25	24.629	24.629
14:25:00	230.449	0	98.3333	24.482	24.507
14:30:00	230.761	0	98.4167	24.361	24.385
14:35:00	231.063	0	98.5	24.239	24.263
14:40:00	231.095	0	98.5833	24.117	24.141
14:45:00	231.397	0	98.6667	24.02	24.044
14:50:00	231.462	0	98.75	23.923	23.923
14:55:00	231.483	0	98.8333	23.825	23.825
15:00:00	232.065	0	98.9167	23.704	23.728
15:05:00	232.001	0	99	23.607	23.631
15:10:00	232.119	0	99.0833	23.51	23.534
15:15:00	231.936	0	99.1667	23.437	23.462
15:20:00	231.99	0	99.25	23.34	23.365
15:25:00	231.882	0	99.3333	23.268	23.292
15:30:00	231.753	0	99.4167	23.171	23.195
15:35:00	231.99	0	99.5	23.098	23.123
15:40:00	232.065	0	99.5833	23.026	23.026
15:45:00	232.27	0	99.6667	22.953	22.953
15:50:00	232.054	0	99.75	22.881	22.881
15:55:00	232.518	0	99.8333	22.808	22.832
16:00:00	232.195	0	99.9167	22.736	22.76
16:05:00	231.257	0	100	22.663	22.688
16:10:00	230.126	0	100.083	22.615	22.615
16:15:00	230.966	0	100.167	22.543	22.543
16:20:00	231.667	0	100.25	22.471	22.495
16:25:00	231.839	0	100.333	22.422	22.422
16:30:00	231.71	0	100.417	22.35	22.374
16:35:00	231.979	0	100.5	22.302	22.302
16:40:00	231.99	0	100.583	22.23	22.254
16:45:00	232.248	0	100.667	22.181	22.205
16:50:00	231.548	0	100.75	22.133	22.133
16:55:00	231.871	0	100.833	22.085	22.085
17:00:00	232.345	0	100.917	22.037	22.037
17:05:00	232.701	0	101	21.965	21.989
17:10:00	233.154	0	101.083	21.917	21.941
17:15:00	233.585	0	101.167	21.869	21.893
17:20:00	233.66	0	101.25	21.821	21.845
17:25:00	233.703	0	101.333	21.772	21.797
17:30:00	233.358	0	101.417	21.724	21.748
17:35:00	233.272	0	101.5	21.676	21.7
17:40:00	233.121	0	101.583	21.628	21.652
17:45:00	232.83	0	101.667	21.604	21.604
17:50:00	232.389	0	101.75	21.556	21.556
17:55:00	232.55	0	101.833	21.508	21.508
18:00:00	232.733	0	101.917	21.46	21.484
18:05:00	232.798	0	102	21.412	21.436
18:10:00	231.882	0	102.083	21.388	21.388
18:15:00	234.889	0	102.167	21.34	21.364
18:20:00	235.966	0	102.25	21.316	21.316
18:25:00	235.524	0	102.333	21.268	21.268
18:30:00	235.514	0	102.417	21.22	21.244
18:35:00	235.33	0	102.5	21.196	21.196
18:40:00	235.212	0	102.583	21.148	21.172
18:45:00	235.546	0	102.667	21.124	21.124
18:50:00	235.578	0	102.75	21.076	21.1
18:55:00	235.535	0	102.833	21.053	21.053
19:00:00	235.147	0	102.917	21.005	21.029
19:05:00	235.341	0	103	20.981	20.981
19:10:00	235.287	0	103.083	20.957	20.981
19:15:00	235.287	0	103.167	20.909	20.933
19:20:00	235.309	0	103.25	20.885	20.885
19:25:00	235.471	0	103.333	20.861	20.861
19:30:00	235.352	0	103.417	20.813	20.813
19:35:00	235.923	0	103.5	20.789	20.789
19:40:00	235.708	0	103.583	20.741	20.765
19:45:00	235.514	0	103.667	20.717	20.741
19:50:00	235.6	0	103.75	20.693	20.693
19:55:00	235.578	0	103.833	20.669	20.669
20:00:00	235.708	0	103.917	20.621	20.645
20:05:00	235.611	0	104	20.598	20.621
20:10:00	235.934	0	104.083	20.574	20.574
20:15:00	236.322	0	104.167	20.526	20.55
20:20:00	235.912	0	104.25	20.526	20.526
20:25:00	233.639	0	104.333	20.478	20.502
20:30:00	234.188	0	104.417	20.454	20.478
20:35:00	233.886	0	104.5	20.43	20.454
20:40:00	233.682	0	104.583	20.406	20.406
20:45:00	234.07	0	104.667	20.382	20.382
20:50:00	234.716	0	104.75	20.358	20.358
20:55:00	235.029	0	104.833	20.334	20.334
21:00:00	235.083	0	104.917	20.311	20.311
21:05:00	235.147	0	105	20.263	20.287
21:10:00	235.255	0	105.083	20.239	20.263
21:15:00	235.115	0	105.167	20.215	20.239
21:20:00	235.751	0	105.25	20.191	20.215
21:25:00	235.826	0	105.333	20.167	20.191
21:30:00	235.6	0	105.417	20.143	20.167
21:35:00	235.524	0	105.5	20.119	20.143
21:40:00	235.718	0	105.583	20.095	20.119
21:45:00	235.891	0	105.667	20.072	20.095
21:50:00	235.945	0	105.75	20.048	20.072
21:55:00	236.225	0	105.833	20.024	20.048
22:00:00	232.777	0	105.917	20.024	20.024
22:05:00	231.505	0	106	20	20
22:10:00	231.419	0	106.083	19.952	19.976
22:15:00	231.807	0	106.167	19.952	19.952
22:20:00	232.087	0	106.25	19.928	19.928
22:25:00	232.292	0	106.333	19.904	19.904
22:30:00	232.583	0	106.417	19.881	19.881
22:35:00	232.927	0	106.5	19.857	19.857
22:40:00	233.52	0	106.583	19.833	19.833
22:45:00	233.919	0	106.667	19.809	19.809
22:50:00	234.156	0	106.75	19.809	19.809
22:55:00	234.371	0	106.833	19.761	19.785
23:00:00	234.662	0	106.917	19.761	19.761
23:05:00	234.652	0	107	19.737	19.737
23:10:00	234.533	0	107.083	19.713	19.713
23:15:00	234.856	0	107.167	19.69	19.69
23:20:00	235.621	0	107.25	19.666	19.69
23:25:00	235.665	0	107.333	19.642	19.666
23:30:00	235.837	0	107.417	19.642	19.642
23:35:00	235.686	0	107.5	19.618	19.618
23:40:00	235.772	0	107.583	19.594	19.594
23:45:00	236.031	0	107.667	19.57	19.594
23:50:00	235.352	0	107.75	19.57	19.57
23:55:00	233.154	0	107.833	19.546	19.546
00:00:00	232.938	0	107.917	19.523	19.523
00:05:00	232.938	0	108	19.499	19.523
00:10:00	233.218	0	108.083	19.499	19.499
00:15:00	233.649	0	108.167	19.475	19.475
00:20:00	233.736	0	108.25	19.451	19.451
00:25:00	233.865	0	108.333	19.451	19.451
00:30:00	233.811	0	108.417	19.427	19.427
00:35:00	233.865	0	108.5	19.403	19.403
00:40:00	233.854	0	108.583	19.379	19.403
00:45:00	234.231	0	108.667	19.379	19.379
00:50:00	234.414	0	108.75	19.356	19.379
00:55:00	234.425	0	108.833	19.332	19.356
01:00:00	234.059	0	108.917	19.308	19.332
01:05:00	233.951	0	109	19.308	19.308
01:10:00	233.951	0	109.083	19.284	19.284
01:15:00	234.565	0	109.167	19.284	19.284
01:20:00	234.899	0	109.25	19.26	19.26
01:25:00	234.878	0	109.333	19.236	19.236
01:30:00	234.565	0	109.417	19.213	19.236
01:35:00	234.576	0	109.5	19.213	19.213
01:40:00	234.652	0	109.583	19.189	19.189
01:45:00	234.641	0	109.667	19.165	19.189
01:50:00	234.458	0	109.75	19.165	19.165
01:55:00	234.738	0	109.833	19.141	19.165
02:00:00	234.393	0	109.917	19.141	19.141
02:05:00	234.124	0	110	19.117	19.117
02:10:00	234.361	0	110.083	19.093	19.117
02:15:00	234.468	0	110.167	19.093	19.093
02:20:00	234.555	0	110.25	19.07	19.07
02:25:00	234.468	0	110.333	19.046	19.07
02:30:00	234.587	0	110.417	19.046	19.07
02:35:00	234.274	0	110.5	19.022	19.046
02:40:00	234.274	0	110.583	19.022	19.022
02:45:00	234.253	0	110.667	18.998	18.998
02:50:00	234.35	0	110.75	18.974	18.998
02:55:00	234.468	0	110.833	18.974	18.974
03:00:00	234.544	0	110.917	18.95	18.974
03:05:00	234.544	0	111	18.95	18.95
03:10:00	234.285	0	111.083	18.927	18.927
03:15:00	234.468	0	111.167	18.903	18.927
03:20:00	234.544	0	111.25	18.903	18.903
03:25:00	234.371	0	111.333	18.879	18.903
03:30:00	234.49	0	111.417	18.879	18.879
03:35:00	234.479	0	111.5	18.855	18.879
03:40:00	234.522	0	111.583	18.855	18.855
03:45:00	234.404	0	111.667	18.831	18.855
03:50:00	234.393	0	111.75	18.831	18.831
03:55:00	234.91	0	111.833	18.807	18.807
04:00:00	234.522	0	111.917	18.807	18.807
04:05:00	234.77	0	112	18.784	18.784
04:10:00	234.781	0	112.083	18.76	18.784
04:15:00	234.587	0	112.167	18.76	18.76
04:20:00	234.544	0	112.25	18.736	18.76
04:25:00	234.371	0	112.333	18.736	18.736
04:30:00	234.307	0	112.417	18.736	18.736
04:35:00	234.436	0	112.5	18.712	18.712
04:40:00	234.059	0	112.583	18.688	18.712
04:45:00	234.016	0	112.667	18.688	18.688
04:50:00	234.091	0	112.75	18.688	18.688
04:55:00	233.93	0	112.833	18.665	18.665
05:00:00	233.649	0	112.917	18.665	18.665
05:05:00	233.66	0	113	18.641	18.641
05:10:00	233.692	0	113.083	18.617	18.641
05:15:00	233.466	0	113.167	18.617	18.617
05:20:00	232.981	0	113.25	18.617	18.617
05:25:00	233.423	0	113.333	18.593	18.593
05:30:00	233.111	0	113.417	18.569	18.593
05:35:00	232.884	0	113.5	18.569	18.569
05:40:00	232.518	0	113.583	18.546	18.569
05:45:00	232.238	0	113.667	18.546	18.546
05:50:00	232.486	0	113.75	18.522	18.546
05:55:00	233.132	0	113.833	18.522	18.522
06:00:00	233.542	0	113.917	18.522	18.522
06:05:00	232.895	0	114	18.498	18.498
06:10:00	233.014	0	114.083	18.498	18.498
06:15:00	232.895	0	114.167	18.474	18.474
06:20:00	232.335	0	114.25	18.474	18.474
06:25:00	232.022	0	114.333	18.45	18.474
06:30:00	231.677	0	114.417	18.45	18.45
06:35:00	231.354	0	114.5	18.426	18.45
06:40:00	230.783	0	114.583	18.426	18.426
06:45:00	230.632	0	114.667	18.403	18.426
06:50:00	232.593	0	114.75	18.403	18.403
06:55:00	232.927	0	114.833	18.403	18.403
07:00:00	232.873	0	114.917	18.379	18.379
07:05:00	231.645	0	115	18.379	18.379
07:10:00	230.287	0	115.083	18.355	18.355
07:15:00	229.91	0	115.167	18.355	18.355
07:20:00	230.233	0	115.25	18.331	18.355
07:25:00	229.985	0	115.333	18.331	18.331
07:30:00	230.266	0	115.417	18.331	18.331
07:35:00	230.912	0	115.5	18.307	18.307
07:40:00	232.184	0	115.583	18.307	18.307
07:45:00	232.259	0	115.667	18.284	18.307
07:50:00	232.13	0	115.75	18.284	18.284
07:55:00	232.216	0	115.833	18.284	18.284
08:00:00	231.505	0	115.917	18.26	18.284
08:05:00	230.988	0	116	18.26	18.26
08:10:00	231.063	0	116.083	18.236	18.26
08:15:00	232.561	0	116.167	18.236	18.236
08:20:00	232.518	0	116.25	18.236	18.236
08:25:00	232.917	0	116.333	18.212	18.236
08:30:00	232.841	0	116.417	18.212	18.236
08:35:00	232.82	0	116.5	18.212	18.212
08:40:00	232.421	0	116.583	18.188	18.212
08:45:00	232.195	0	116.667	18.188	18.188
08:50:00	232.205	0	116.75	18.188	18.188
08:55:00	231.968	0	116.833	18.165	18.188
09:00:00	231.192	0	116.917	18.165	18.165
09:05:00	231.483	0	117	18.141	18.165
09:10:00	231.968	0	117.083	18.141	18.165
09:15:00	231.332	0	117.167	18.141	18.141
09:20:00	231.225	0	117.25	18.141	18.141
09:25:00	230.988	0	117.333	18.117	18.117
09:30:00	231.322	0	117.417	18.117	18.117
09:35:00	231.419	0	117.5	18.093	18.117
09:40:00	231.483	0	117.583	18.093	18.093
09:45:00	231.139	0	117.667	18.07	18.093
09:50:00	231.009	0	117.75	18.07	18.093
09:55:00	231.613	0	117.833	18.07	18.07
10:00:00	230.988	0	117.917	18.046	18.07
10:05:00	230.934	0	118	18.046	18.07
10:10:00	231.397	0	118.083	18.046	18.046
10:15:00	231.839	0	118.167	18.022	18.046
10:20:00	232.195	0	118.25	18.022	18.046
10:25:00	232.259	0	118.333	18.022	18.022
10:30:00	231.817	0	118.417	18.022	18.022
10:35:00	231.731	0	118.5	17.998	18.022
10:40:00	231.613	0	118.583	17.998	17.998
10:45:00	232.173	0	118.667	17.998	17.998
10:50:00	232.442	0	118.75	17.974	17.974
10:55:00	231.947	0	118.833	17.974	17.998
11:00:00	231.537	0	118.917	17.974	17.974
11:05:00	231.828	0	119	17.951	17.974
11:10:00	232.561	0	119.083	17.951	17.974
11:15:00	233.132	0	119.167	17.951	17.951
11:20:00	233.326	0	119.25	17.951	17.951
11:25:00	233.014	0	119.333	17.927	17.951
11:30:00	232.992	0	119.417	17.927	17.927
11:35:00	232.992	0	119.5	17.927	17.927
11:40:00	232.949	0	119.583	17.903	17.927
11:45:00	232.583	0	119.667	17.903	17.903
11:50:00	232.669	0	119.75	17.903	17.903
11:55:00	232.992	0	119.833	17.879	17.903
12:00:00	233.466	0	119.917	17.879	17.903
12:05:00	233.111	0	120	17.879	17.879
12:10:00	233.164	0	120.083	17.879	17.879
12:15:00	233.93	0	120.167	17.855	17.879
12:20:00	234.037	0	120.25	17.855	17.855
12:25:00	233.531	0	120.333	17.832	17.855
12:30:00	233.617	0	120.417	17.832	17.855
12:35:00	233.908	0	120.5	17.832	17.855
12:40:00	234.027	0	120.583	17.832	17.832
12:45:00	233.542	0	120.667	17.832	17.832
12:50:00	233.057	0	120.75	17.808	17.832
12:55:00	233.692	0	120.833	17.808	17.808
13:00:00	233.886	0	120.917	17.808	17.808
13:05:00	231.958	0	121	17.784	17.808
13:10:00	231.731	0	121.083	17.784	17.784
13:15:00	231.699	0	121.167	17.784	17.784
13:20:00	231.623	0	121.25	17.784	17.784
13:25:00	232.195	0	121.333	17.76	17.784
13:30:00	232.044	0	121.417	17.76	17.784
13:35:00	231.968	0	121.5	17.76	17.76
13:40:00	232.076	0	121.583	17.736	17.76
13:45:00	232.464	0	121.667	17.736	17.76
13:50:00	232.583	0	121.75	17.736	17.736
13:55:00	232.777	0	121.833	17.736	17.736
14:00:00	232.873	0	121.917	17.736	17.736
14:05:00	233.24	0	122	17.713	17.736
14:10:00	232.723	0	122.083	17.713	17.713
14:15:00	232.195	0	122.167	17.713	17.713
14:20:00	231.764	0	122.25	17.689	17.713
14:25:00	232.615	0	122.333	17.689	17.713
14:30:00	232.852	0	122.417	17.689	17.689
14:35:00	232.647	0	122.5	17.689	17.689
14:40:00	232.744	0	122.583	17.665	17.689
14:45:00	232.895	0	122.667	17.665	17.665
14:50:00	233.186	0	122.75	17.665	17.665
14:55:00	233.046	0	122.833	17.641	17.665
15:00:00	233.197	0	122.917	17.641	17.665
15:05:00	233.423	0	123	17.641	17.665
15:10:00	234.037	0	123.083	17.641	17.641
15:15:00	234.156	0	123.167	17.641	17.641
15:20:00	234.242	0	123.25	17.618	17.641
15:25:00	234.361	0	123.333	17.618	17.618
15:30:00	234.511	0	123.417	17.618	17.618
15:35:00	234.242	0	123.5	17.618	17.618
15:40:00	234.005	0	123.583	17.594	17.618
15:45:00	234.856	0	123.667	17.594	17.594
15:50:00	234.565	0	123.75	17.594	17.594
15:55:00	234.792	0	123.833	17.57	17.594
16:00:00	235.029	0	123.917	17.57	17.594
16:05:00	234.533	0	124	17.57	17.594
16:10:00	234.328	0	124.083	17.57	17.57
16:15:00	234.953	0	124.167	17.57	17.57
16:20:00	234.738	0	124.25	17.546	17.57
16:25:00	235.061	0	124.333	17.546	17.57
16:30:00	235.277	0	124.417	17.546	17.546
16:35:00	235.977	0	124.5	17.546	17.546
16:40:00	235.492	0	124.583	17.522	17.546
16:45:00	235.33	0	124.667	17.522	17.546
16:50:00	235.244	0	124.75	17.522	17.546
16:55:00	235.934	0	124.833	17.522	17.522
17:00:00	236.031	0	124.917	17.522	17.522
17:05:00	235.406	0	125	17.499	17.522
17:10:00	235.471	0	125.083	17.499	17.522
17:15:00	235.341	0	125.167	17.499	17.499
17:20:00	235.04	0	125.25	17.499	17.499
17:25:00	235.33	0	125.333	17.475	17.499
17:30:00	235.632	0	125.417	17.475	17.499
17:35:00	235.762	0	125.5	17.475	17.499
17:40:00	235.449	0	125.583	17.475	17.475
17:45:00	234.878	0	125.667	17.475	17.475
17:50:00	234.759	0	125.75	17.451	17.475
17:55:00	234.953	0	125.833	17.451	17.475
18:00:00	235.557	0	125.917	17.451	17.451
18:05:00	235.783	0	126	17.451	17.451
18:10:00	235.514	0	126.083	17.427	17.451
18:15:00	235.233	0	126.167	17.427	17.427
18:20:00	233.552	0	126.25	17.427	17.451
18:25:00	232.076	0	126.333	17.427	17.427
18:30:00	232.173	0	126.417	17.403	17.427
18:35:00	232.227	0	126.5	17.403	17.403
18:40:00	232.087	0	126.583	17.403	17.427
18:45:00	232.13	0	126.667	17.403	17.403
18:50:00	231.548	0	126.75	17.403	17.403
18:55:00	231.182	0	126.833	17.38	17.403
19:00:00	231.376	0	126.917	17.38	17.403
19:05:00	231.58	0	127	17.38	17.38
19:10:00	231.182	0	127.083	17.38	17.38
19:15:00	231.44	0	127.167	17.356	17.38
19:20:00	231.871	0	127.25	17.356	17.356
19:25:00	231.656	0	127.333	17.356	17.38
19:30:00	231.796	0	127.417	17.356	17.356
19:35:00	231.958	0	127.5	17.332	17.356
19:40:00	231.613	0	127.583	17.332	17.356
19:45:00	231.591	0	127.667	17.332	17.332
19:50:00	231.505	0	127.75	17.332	17.332
19:55:00	231.861	0	127.833	17.308	17.332
20:00:00	232.292	0	127.917	17.308	17.332
20:05:00	232.841	0	128	17.308	17.332
20:10:00	233.218	0	128.083	17.308	17.308
20:15:00	233.434	0	128.167	17.308	17.332
20:20:00	233.369	0	128.25	17.308	17.308
20:25:00	233.725	0	128.333	17.285	17.308
20:30:00	234.21	0	128.417	17.285	17.308
20:35:00	234.511	0	128.5	17.285	17.285
20:40:00	234.242	0	128.583	17.285	17.285
20:45:00	234.124	0	128.667	17.285	17.285
20:50:00	234.07	0	128.75	17.261	17.285
20:55:00	234.328	0	128.833	17.261	17.285
21:00:00	234.781	0	128.917	17.261	17.261
21:05:00	234.856	0	129	17.261	17.261
21:10:00	234.932	0	129.083	17.237	17.261
21:15:00	235.33	0	129.167	17.237	17.261
21:20:00	235.589	0	129.25	17.237	17.261
21:25:00	235.783	0	129.333	17.237	17.261
21:30:00	236.031	0	129.417	17.237	17.237
21:35:00	235.546	0	129.5	17.237	17.237
21:40:00	235.88	0	129.583	17.213	17.237
21:45:00	235.934	0	129.667	17.213	17.237
21:50:00	235.988	0	129.75	17.213	17.213
21:55:00	236.559	0	129.833	17.213	17.213
22:00:00	234.511	0	129.917	17.189	17.213
22:05:00	233.951	0	130	17.189	17.213
22:10:00	234.49	0	130.083	17.189	17.189
22:15:00	234.878	0	130.167	17.189	17.189
22:20:00	235.136	0	130.25	17.189	17.189
22:25:00	235.266	0	130.333	17.189	17.189
22:30:00	235.341	0	130.417	17.189	17.189
22:35:00	235.212	0	130.5	17.166	17.189
22:40:00	235.417	0	130.583	17.166	17.189
22:45:00	235.395	0	130.667	17.166	17.166
22:50:00	235.223	0	130.75	17.166	17.166
22:55:00	235.158	0	130.833	17.166	17.166
23:00:00	235.654	0	130.917	17.166	17.166
23:05:00	235.643	0	131	17.142	17.166
23:10:00	236.074	0	131.083	17.142	17.142
23:15:00	233.725	0	131.167	17.142	17.142
23:20:00	233.736	0	131.25	17.142	17.142
23:25:00	233.66	0	131.333	17.118	17.142
23:30:00	234.188	0	131.417	17.118	17.118
23:35:00	234.005	0	131.5	17.118	17.118
23:40:00	234.231	0	131.583	17.118	17.118
23:45:00	234.447	0	131.667	17.118	17.118
23:50:00	235.04	0	131.75	17.094	17.118
23:55:00	235.018	0	131.833	17.094	17.118
00:00:00	235.201	0	131.917	17.094	17.094
00:05:00	235.363	0	132	17.094	17.094
00:10:00	235.578	0	132.083	17.094	17.094
00:15:00	235.675	0	132.167	17.071	17.094
00:20:00	236.096	0	132.25	17.071	17.094
00:25:00	236.257	0	132.333	17.071	17.071
00:30:00	233.305	0	132.417	17.071	17.071
00:35:00	233.326	0	132.5	17.071	17.071
00:40:00	233.488	0	132.583	17.047	17.071
00:45:00	233.423	0	132.667	17.047	17.047
00:50:00	233.488	0	132.75	17.047	17.047
00:55:00	233.789	0	132.833	17.047	17.047
01:00:00	233.768	0	132.917	17.047	17.047
01:05:00	233.574	0	133	17.047	17.047
01:10:00	233.585	0	133.083	17.023	17.047
01:15:00	233.671	0	133.167	17.023	17.047
01:20:00	233.326	0	133.25	17.023	17.023
01:25:00	233.499	0	133.333	17.023	17.023
01:30:00	233.768	0	133.417	17.023	17.023
01:35:00	233.477	0	133.5	16.999	17.023
01:40:00	233.865	0	133.583	16.999	17.023
01:45:00	233.725	0	133.667	16.999	17.023
01:50:00	233.725	0	133.75	16.999	16.999
01:55:00	233.423	0	133.833	16.999	16.999
02:00:00	233.563	0	133.917	16.999	16.999
02:05:00	233.563	0	134	16.975	16.999
02:10:00	233.671	0	134.083	16.975	16.975
02:15:00	233.94	0	134.167	16.975	16.975
02:20:00	234.08	0	134.25	16.975	16.999
02:25:00	234.005	0	134.333	16.975	16.975
02:30:00	233.843	0	134.417	16.975	16.975
02:35:00	233.833	0	134.5	16.975	16.975
02:40:00	233.789	0	134.583	16.952	16.952
02:45:00	233.897	0	134.667	16.952	16.952
02:50:00	233.994	0	134.75	16.952	16.952
02:55:00	233.93	0	134.833	16.952	16.952
03:00:00	233.8	0	134.917	16.928	16.952
03:05:00	233.628	0	135	16.928	16.952
03:10:00	233.811	0	135.083	16.928	16.952
03:15:00	234.124	0	135.167	16.928	16.952
03:20:00	233.897	0	135.25	16.928	16.928
03:25:00	233.886	0	135.333	16.928	16.928
03:30:00	233.973	0	135.417	16.928	16.928
03:35:00	233.811	0	135.5	16.904	16.928
03:40:00	233.93	0	135.583	16.904	16.928
03:45:00	234.091	0	135.667	16.904	16.904
03:50:00	234.231	0	135.75	16.904	16.904
03:55:00	234.027	0	135.833	16.904	16.904
04:00:00	233.865	0	135.917	16.88	16.904
04:05:00	233.962	0	136	16.88	16.904
04:10:00	233.66	0	136.083	16.88	16.904
04:15:00	233.542	0	136.167	16.88	16.88
04:20:00	233.628	0	136.25	16.88	16.88
04:25:00	233.628	0	136.333	16.857	16.88
04:30:00	233.714	0	136.417	16.88	16.88
04:35:00	233.466	0	136.5	16.857	16.88
04:40:00	233.682	0	136.583	16.857	16.88
04:45:00	233.391	0	136.667	16.857	16.857
04:50:00	233.089	0	136.75	16.857	16.857
04:55:00	232.917	0	136.833	16.857	16.857
05:00:00	232.906	0	136.917	16.857	16.857
05:05:00	232.981	0	137	16.833	16.857
05:10:00	232.529	0	137.083	16.833	16.857
05:15:00	231.979	0	137.167	16.833	16.857
05:20:00	232.248	0	137.25	16.833	16.833
05:25:00	231.817	0	137.333	16.833	16.833
05:30:00	231.483	0	137.417	16.809	16.833
05:35:00	231.861	0	137.5	16.809	16.833
05:40:00	231.688	0	137.583	16.809	16.809
05:45:00	231.268	0	137.667	16.809	16.809
05:50:00	230.654	0	137.75	16.809	16.809
05:55:00	231.667	0	137.833	16.809	16.809
06:00:00	231.408	0	137.917	16.785	16.809
06:05:00	230.923	0	138	16.785	16.785
06:10:00	230.772	0	138.083	16.785	16.785
06:15:00	230.848	0	138.167	16.785	16.785
06:20:00	231.408	0	138.25	16.785	16.785
06:25:00	231.02	0	138.333	16.785	16.785
06:30:00	232.927	0	138.417	16.785	16.785
06:35:00	233.1	0	138.5	16.761	16.785
06:40:00	232.798	0	138.583	16.761	16.785
06:45:00	233.067	0	138.667	16.761	16.761
06:50:00	232.669	0	138.75	16.761	16.761
06:55:00	231.365	0	138.833	16.761	16.761
07:00:00	230.858	0	138.917	16.761	16.761
07:05:00	230.869	0	139	16.761	16.761
07:10:00	229.985	0	139.083	16.738	16.761
07:15:00	232.626	0	139.167	16.738	16.738
07:20:00	232.841	0	139.25	16.738	16.738
07:25:00	232.378	0	139.333	16.738	16.738
07:30:00	232.367	0	139.417	16.738	16.738
07:35:00	231.925	0	139.5	16.738	16.738
07:40:00	232.184	0	139.583	16.738	16.738
07:45:00	231.623	0	139.667	16.714	16.714
07:50:00	231.192	0	139.75	16.714	16.714
07:55:00	231.042	0	139.833	16.714	16.714
08:00:00	230.632	0	139.917	16.714	16.714
08:05:00	230.783	0	140	16.714	16.714
08:10:00	230.837	0	140.083	16.714	16.714
08:15:00	232.13	0	140.167	16.714	16.714
08:20:00	231.667	0	140.25	16.714	16.714
08:25:00	231.408	0	140.333	16.69	16.714
08:30:00	230.621	0	140.417	16.69	16.714
08:35:00	230.514	0	140.5	16.69	16.714
08:40:00	231.483	0	140.583	16.69	16.69
08:45:00	231.936	0	140.667	16.69	16.714
08:50:00	231.742	0	140.75	16.69	16.69
08:55:00	231.893	0	140.833	16.69	16.69
09:00:00	232.529	0	140.917	16.69	16.69
09:05:00	232.712	0	141	16.666	16.69
09:10:00	233.682	0	141.083	16.666	16.69
09:15:00	233.078	0	141.167	16.666	16.69
09:20:00	233.186	0	141.25	16.666	16.69
09:25:00	232.981	0	141.333	16.666	16.69
09:30:00	231.904	0	141.417	16.666	16.666
09:35:00	231.893	0	141.5	16.666	16.666
09:40:00	232.356	0	141.583	16.666	16.666
09:45:00	233.1	0	141.667	16.666	16.666
09:50:00	232.507	0	141.75	16.643	16.666
09:55:00	232.83	0	141.833	16.643	16.666
10:00:00	233.046	0	141.917	16.643	16.666
10:05:00	232.787	0	142	16.643	16.666
10:10:00	232.593	0	142.083	16.643	16.666
10:15:00	232.292	0	142.167	16.643	16.643
10:20:00	232.033	0	142.25	16.643	16.643
10:25:00	232.453	0	142.333	16.643	16.643
10:30:00	232.022	0	142.417	16.643	16.643
10:35:00	231.936	0	142.5	16.643	16.643
10:40:00	231.58	0	142.583	16.643	16.643
10:45:00	232.432	0	142.667	16.619	16.643
10:50:00	232.044	0	142.75	16.619	16.643
10:55:00	232.151	0	142.833	16.619	16.643
11:00:00	232.636	0	142.917	16.619	16.643
11:05:00	232.841	0	143	16.619	16.619
11:10:00	232.873	0	143.083	16.619	16.619
11:15:00	232.475	0	143.167	16.619	16.619
11:20:00	232.421	0	143.25	16.619	16.619
11:25:00	232.97	0	143.333	16.619	16.619
11:30:00	232.41	0	143.417	16.595	16.619
11:35:00	232.604	0	143.5	16.595	16.619
11:40:00	232.82	0	143.583	16.595	16.595
11:45:00	232.712	0	143.667	16.595	16.619
11:50:00	233.057	0	143.75	16.595	16.619
11:55:00	233.445	0	143.833	16.595	16.595
12:00:00	233.563	0	143.917	16.595	16.595
12:05:00	233.164	0	144	16.595	16.595
12:10:00	233.606	0	144.083	16.595	16.595
12:15:00	233.768	0	144.167	16.595	16.595
12:20:00	233.8	0	144.25	16.571	16.595
12:25:00	233.445	0	144.333	16.571	16.595
12:30:00	233.886	0	144.417	16.595	16.595
12:35:00	233.682	0	144.5	16.571	16.595
12:40:00	233.736	0	144.583	16.571	16.571
12:45:00	233.402	0	144.667	16.571	16.595
12:50:00	233.1	0	144.75	16.571	16.571
12:55:00	234.242	0	144.833	16.571	16.571
13:00:00	233.639	0	144.917	16.571	16.571
13:05:00	233.434	0	145	16.547	16.571
13:10:00	233.639	0	145.083	16.547	16.571
13:15:00	233.38	0	145.167	16.547	16.571
13:20:00	233.563	0	145.25	16.547	16.571
13:25:00	232.992	0	145.333	16.547	16.571
13:30:00	232.873	0	145.417	16.547	16.547
13:35:00	233.132	0	145.5	16.547	16.547
13:40:00	233.639	0	145.583	16.547	16.547
13:45:00	234.091	0	145.667	16.547	16.547
13:50:00	234.221	0	145.75	16.547	16.547
13:55:00	234.188	0	145.833	16.547	16.547
14:00:00	234.059	0	145.917	16.524	16.547
14:05:00	234.264	0	146	16.524	16.547
14:10:00	234.393	0	146.083	16.524	16.547
14:15:00	234.587	0	146.167	16.524	16.547
14:20:00	234.705	0	146.25	16.524	16.524
14:25:00	234.156	0	146.333	16.524	16.524
14:30:00	234.49	0	146.417	16.524	16.524
14:35:00	234.705	0	146.5	16.5	16.524
14:40:00	234.479	0	146.583	16.524	16.524
14:45:00	234.522	0	146.667	16.5	16.524
14:50:00	235.083	0	146.75	16.5	16.524
14:55:00	235.244	0	146.833	16.5	16.524
15:00:00	234.824	0	146.917	16.5	16.524
15:05:00	234.565	0	147	16.5	16.524
15:10:00	235.244	0	147.083	16.5	16.5
15:15:00	235.524	0	147.167	16.5	16.524
15:20:00	235.729	0	147.25	16.5	16.5
15:25:00	235.309	0	147.333	16.5	16.5
15:30:00	234.953	0	147.417	16.5	16.5
15:35:00	235.578	0	147.5	16.5	16.5
15:40:00	235.546	0	147.583	16.5	16.5
15:45:00	235.826	0	147.667	16.476	16.5
15:50:00	236.182	0	147.75	16.476	16.5
15:55:00	236.063	0	147.833	16.476	16.5
16:00:00	236.171	0	147.917	16.476	16.5
16:05:00	236.343	0	148	16.476	16.5
16:10:00	236.624	0	148.083	16.476	16.5
16:15:00	235.223	0	148.167	16.476	16.476
16:20:00	233.962	0	148.25	16.476	16.476
16:25:00	233.757	0	148.333	16.476	16.476
16:30:00	234.285	0	148.417	16.476	16.476
16:35:00	234.113	0	148.5	16.452	16.476
16:40:00	234.145	0	148.583	16.452	16.476
16:45:00	234.08	0	148.667	16.452	16.476
16:50:00	234.414	0	148.75	16.452	16.476
16:55:00	234.522	0	148.833	16.452	16.452
17:00:00	235.18	0	148.917	16.452	16.476
17:05:00	235.061	0	149	16.452	16.452
17:10:00	234.436	0	149.083	16.452	16.452
17:15:00	234.221	0	149.167	16.452	16.452
17:20:00	234.134	0	149.25	16.452	16.452
17:25:00	233.994	0	149.333	16.452	16.452
17:30:00	234.468	0	149.417	16.429	16.452
17:35:00	234.759	0	149.5	16.429	16.452
17:40:00	234.35	0	149.583	16.429	16.452
17:45:00	234.328	0	149.667	16.429	16.452
17:50:00	234.662	0	149.75	16.429	16.429
17:55:00	235.244	0	149.833	16.429	16.452
18:00:00	235.061	0	149.917	16.429	16.429
18:05:00	234.608	0	150	16.429	16.429
18:10:00	234.468	0	150.083	16.429	16.429
18:15:00	234.134	0	150.167	16.429	16.429
18:20:00	233.035	0	150.25	16.429	16.429
18:25:00	231.02	0	150.333	16.405	16.429
18:30:00	231.44	0	150.417	16.405	16.429
18:35:00	231.149	0	150.5	16.405	16.405
18:40:00	231.117	0	150.583	16.405	16.405
18:45:00	231.063	0	150.667	16.405	16.429
18:50:00	231.16	0	150.75	16.405	16.405
18:55:00	231.106	0	150.833	16.405	16.405
19:00:00	230.923	0	150.917	16.405	16.405
19:05:00	230.794	0	151	16.405	16.405
19:10:00	231.042	0	151.083	16.381	16.405
19:15:00	231.214	0	151.167	16.381	16.405
19:20:00	231.085	0	151.25	16.381	16.405
19:25:00	231.171	0	151.333	16.381	16.405
19:30:00	231.376	0	151.417	16.381	16.405
19:35:00	231.559	0	151.5	16.381	16.381
19:40:00	231.613	0	151.583	16.381	16.381
19:45:00	231.656	0	151.667	16.381	16.381
19:50:00	231.893	0	151.75	16.381	16.381
19:55:00	232.022	0	151.833	16.381	16.381
20:00:00	232.162	0	151.917	16.357	16.381
20:05:00	232.011	0	152	16.357	16.381
20:10:00	232.453	0	152.083	16.357	16.381
20:15:00	232.593	0	152.167	16.357	16.381
20:20:00	232.852	0	152.25	16.357	16.357
20:25:00	233.132	0	152.333	16.357	16.357
20:30:00	233.606	0	152.417	16.357	16.357
20:35:00	233.585	0	152.5	16.357	16.357
20:40:00	233.843	0	152.583	16.357	16.357
20:45:00	233.962	0	152.667	16.357	16.357
20:50:00	233.908	0	152.75	16.357	16.357
20:55:00	234.016	0	152.833	16.333	16.357
21:00:00	234.188	0	152.917	16.333	16.357
21:05:00	233.736	0	153	16.333	16.357
21:10:00	234.177	0	153.083	16.333	16.357
21:15:00	234.059	0	153.167	16.333	16.357
21:20:00	234.07	0	153.25	16.333	16.333
21:25:00	234.468	0	153.333	16.333	16.357
21:30:00	234.307	0	153.417	16.333	16.333
21:35:00	234.856	0	153.5	16.333	16.333
21:40:00	234.695	0	153.583	16.333	16.333
21:45:00	235.083	0	153.667	16.333	16.333
21:50:00	234.835	0	153.75	16.31	16.333
21:55:00	235.05	0	153.833	16.333	16.333
22:00:00	235.072	0	153.917	16.31	16.333
22:05:00	235.524	0	154	16.31	16.333
22:10:00	235.438	0	154.083	16.31	16.333
22:15:00	235.46	0	154.167	16.31	16.31
22:20:00	235.632	0	154.25	16.31	16.333
22:25:00	234.124	0	154.333	16.31	16.333
22:30:00	232.68	0	154.417	16.31	16.31
22:35:00	232.335	0	154.5	16.31	16.31
22:40:00	232.496	0	154.583	16.31	16.31
22:45:00	232.539	0	154.667	16.31	16.31
22:50:00	232.561	0	154.75	16.286	16.31
22:55:00	232.302	0	154.833	16.286	16.31
23:00:00	232.906	0	154.917	16.286	16.286
23:05:00	233.078	0	155	16.286	16.31
23:10:00	233.499	0	155.083	16.286	16.31
23:15:00	233.865	0	155.167	16.286	16.31
23:20:00	233.973	0	155.25	16.286	16.286
23:25:00	234.059	0	155.333	16.286	16.286
23:30:00	234.339	0	155.417	16.286	16.286
23:35:00	234.231	0	155.5	16.286	16.286
23:40:00	234.371	0	155.583	16.286	16.286
23:45:00	234.468	0	155.667	16.286	16.286
23:50:00	235.04	0	155.75	16.286	16.286
23:55:00	235.363	0	155.833	16.262	16.286
00:00:00	235.395	0	155.917	16.262	16.286
00:05:00	235.233	0	156	16.262	16.286
00:10:00	234.986	0	156.083	16.262	16.286
00:15:00	235.04	0	156.167	16.262	16.286
00:20:00	235.05	0	156.25	16.262	16.262
00:25:00	235.244	0	156.333	16.262	16.262
00:30:00	235.352	0	156.417	16.262	16.262
00:35:00	234.846	0	156.5	16.262	16.262
00:40:00	235.104	0	156.583	16.262	16.262
00:45:00	235.19	0	156.667	16.262	16.262
00:50:00	235.374	0	156.75	16.262	16.262
00:55:00	235.848	0	156.833	16.238	16.262
01:00:00	235.988	0	156.917	16.238	16.262
01:05:00	235.88	0	157	16.238	16.262
01:10:00	235.891	0	157.083	16.238	16.262
01:15:00	235.848	0	157.167	16.238	16.262
01:20:00	235.686	0	157.25	16.238	16.262
01:25:00	235.772	0	157.333	16.238	16.238
01:30:00	234.167	0	157.417	16.238	16.238
01:35:00	232.992	0	157.5	16.238	16.238
01:40:00	233.111	0	157.583	16.238	16.238
01:45:00	233.035	0	157.667	16.238	16.238
01:50:00	233.046	0	157.75	16.215	16.238
01:55:00	233.251	0	157.833	16.215	16.238
02:00:00	233.272	0	157.917	16.215	16.238
02:05:00	233.315	0	158	16.215	16.238
02:10:00	232.475	0	158.083	16.215	16.238
02:15:00	233.035	0	158.167	16.215	16.215
02:20:00	233.692	0	158.25	16.215	16.238
02:25:00	233.736	0	158.333	16.215	16.215
02:30:00	233.552	0	158.417	16.215	16.215
02:35:00	233.628	0	158.5	16.215	16.215
02:40:00	233.983	0	158.583	16.215	16.215
02:45:00	234.156	0	158.667	16.215	16.215
02:50:00	234.167	0	158.75	16.215	16.215
02:55:00	234.124	0	158.833	16.215	16.215
03:00:00	233.94	0	158.917	16.191	16.215
03:05:00	234.339	0	159	16.191	16.215
03:10:00	234.63	0	159.083	16.191	16.215
03:15:00	234.458	0	159.167	16.191	16.215
03:20:00	234.436	0	159.25	16.191	16.215
03:25:00	234.447	0	159.333	16.191	16.215
03:30:00	234.705	0	159.417	16.191	16.191
03:35:00	234.555	0	159.5	16.191	16.191
03:40:00	234.63	0	159.583	16.191	16.191
03:45:00	234.608	0	159.667	16.191	16.191
03:50:00	234.705	0	159.75	16.191	16.191
03:55:00	234.662	0	159.833	16.191	16.191
04:00:00	234.447	0	159.917	16.167	16.191
04:05:00	234.027	0	160	16.167	16.191
04:10:00	234.21	0	160.083	16.167	16.191
04:15:00	234.468	0	160.167	16.167	16.191
04:20:00	234.382	0	160.25	16.167	16.191
04:25:00	234.522	0	160.333	16.167	16.191
04:30:00	234.382	0	160.417	16.167	16.167
04:35:00	234.167	0	160.5	16.167	16.191
04:40:00	234.091	0	160.583	16.167	16.167
04:45:00	233.692	0	160.667	16.167	16.167
04:50:00	233.876	0	160.75	16.167	16.167
04:55:00	233.962	0	160.833	16.167	16.167
05:00:00	234.242	0	160.917	16.143	16.167
05:05:00	233.736	0	161	16.143	16.167
05:10:00	233.434	0	161.083	16.143	16.167
05:15:00	233.402	0	161.167	16.143	16.167
05:20:00	233.531	0	161.25	16.143	16.167
05:25:00	233.585	0	161.333	16.143	16.167
05:30:00	233.455	0	161.417	16.143	16.167
05:35:00	232.863	0	161.5	16.143	16.167
05:40:00	233.143	0	161.583	16.143	16.143
05:45:00	233.218	0	161.667	16.143	16.143
05:50:00	233.24	0	161.75	16.143	16.143
05:55:00	234.037	0	161.833	16.143	16.143
06:00:00	234.361	0	161.917	16.143	16.143
06:05:00	234.005	0	162	16.119	16.143
06:10:00	233.811	0	162.083	16.119	16.143
06:15:00	233.833	0	162.167	16.119	16.143
06:20:00	233.983	0	162.25	16.119	16.143
06:25:00	233.854	0	162.333	16.119	16.119
06:30:00	233.768	0	162.417	16.119	16.119
06:35:00	233.639	0	162.5	16.119	16.119
06:40:00	233.315	0	162.583	16.119	16.119
06:45:00	232.992	0	162.667	16.119	16.119
06:50:00	232.658	0	162.75	16.119	16.119
06:55:00	232.895	0	162.833	16.096	16.119
07:00:00	232.669	0	162.917	16.119	16.119
07:05:00	232.518	0	163	16.096	16.119
07:10:00	232.292	0	163.083	16.096	16.119
07:15:00	232.302	0	163.167	16.096	16.119
07:20:00	232.615	0	163.25	16.096	16.119
07:25:00	231.882	0	163.333	16.096	16.096
07:30:00	231.688	0	163.417	16.096	16.096
07:35:00	231.322	0	163.5	16.096	16.096
07:40:00	231.386	0	163.583	16.096	16.096
07:45:00	231.419	0	163.667	16.096	16.096
07:50:00	231.893	0	163.75	16.096	16.096
07:55:00	233.272	0	163.833	16.096	16.096
08:00:00	232.798	0	163.917	16.072	16.096
08:05:00	232.809	0	164	16.072	16.096
08:10:00	232.798	0	164.083	16.072	16.096
08:15:00	232.927	0	164.167	16.072	16.096
08:20:00	232.82	0	164.25	16.072	16.096
08:25:00	232.873	0	164.333	16.072	16.072
08:30:00	232.432	0	164.417	16.072	16.072
08:35:00	232.195	0	164.5	16.072	16.072
08:40:00	232.011	0	164.583	16.072	16.072
08:45:00	231.429	0	164.667	16.072	16.072
08:50:00	231.095	0	164.75	16.072	16.072
08:55:00	231.667	0	164.833	16.072	16.072
09:00:00	231.645	0	164.917	16.048	16.072
09:05:00	231.861	0	165	16.048	16.072
09:10:00	231.882	0	165.083	16.048	16.072
09:15:00	231.807	0	165.167	16.048	16.072
09:20:00	231.71	0	165.25	16.048	16.072
09:25:00	231.236	0	165.333	16.048	16.072
09:30:00	231.591	0	165.417	16.048	16.048
09:35:00	231.44	0	165.5	16.048	16.072
09:40:00	231.343	0	165.583	16.048	16.072
09:45:00	231.548	0	165.667	16.048	16.048
09:50:00	231.591	0	165.75	16.048	16.072
09:55:00	231.774	0	165.833	16.048	16.048
10:00:00	231.57	0	165.917	16.048	16.048
10:05:00	231.419	0	166	16.048	16.048
10:10:00	231.516	0	166.083	16.048	16.048
10:15:00	231.225	0	166.167	16.048	16.048
10:20:00	231.397	0	166.25	16.024	16.048
10:25:00	231.57	0	166.333	16.048	16.048
10:30:00	231.742	0	166.417	16.048	16.048
10:35:00	231.774	0	166.5	16.024	16.048
[truncated: 306 more rows]

## Sheet: cxA 7,1kW
Time	Voltage, V	Current, A	Hours	EST, °C	LST, °C	Time	Hours	Tair °C
14:33:21	231.031	0	0	14.75	14.72	15:00:00	0	18.9
14:38:21	218.304	24.7075	0.0833333	14.744	18.055	16:00:00	1	18.6
14:43:21	213.563	32.844	0.166667	15.653	19.746	17:00:00	2	18.8
14:48:21	213.53	32.8323	0.25	17.685	21.516	18:00:00	3	17.2
14:53:21	213.681	32.8534	0.333333	18.731	22.574	19:00:00	4	15.7
14:58:21	213.832	32.8534	0.416667	19.627	23.662	20:00:00	5	14.6
15:03:21	213.983	32.8815	0.5	20.439	24.512	21:00:00	6	13.6
15:08:21	214.134	32.8839	0.583333	21.205	25.269	22:00:00	7	13.2
15:13:21	214.295	32.912	0.666667	21.852	25.907	23:00:00	8	12.4
15:18:21	213.843	32.8487	0.75	22.43	26.474	1900-01-01	9	12
15:23:21	214.101	32.8839	0.833333	22.936	26.993	1900-01-01 01:00:00	10	11.3
15:28:21	213.8	32.844	0.916667	23.371	27.441	1900-01-01 02:00:00	11	11
15:33:21	214.112	32.8722	1	23.783	27.84	1900-01-01 03:00:00	12	11
15:38:21	214.489	32.9285	1.08333	24.147	28.24	1900-01-01 04:00:00	13	10.8
15:43:21	214.274	32.8956	1.16667	24.487	28.591	1900-01-01 05:00:00	14	11
15:48:21	214.026	32.851	1.25	24.78	28.894	1900-01-01 06:00:00	15	11.4
15:53:21	214.317	32.898	1.33333	25.073	29.172	1900-01-01 07:00:00	16	12
15:58:21	213.95	32.8323	1.41667	25.342	29.425	1900-01-01 08:00:00	17	12.7
16:03:21	214.058	32.8534	1.5	25.563	29.679	1900-01-01 09:00:00	18	13.5
16:08:21	215.179	33.0176	1.58333	25.808	29.933	1900-01-01 10:00:00	19	15.9
16:13:21	215.427	33.0528	1.66667	26.03	30.163	1900-01-01 11:00:00	20	18.3
16:18:21	215.244	33.0411	1.75	26.251	30.368	1900-01-01 12:00:00	21	20.4
16:23:21	215.373	33.0458	1.83333	26.449	30.573	1900-01-01 13:00:00	22	19.6
16:28:21	215.545	33.0669	1.91667	26.647	30.778	1900-01-01 14:00:00	23	18
16:33:21	215.836	33.1021	2	26.82	30.958	1900-01-01 15:00:00	24	18.4
16:38:21	215.89	33.1162	2.08333	26.993	31.113	1900-01-01 16:00:00	25	19.5
16:43:21	215.718	33.0997	2.16667	27.142	31.268	1900-01-01 17:00:00	26	19.6
16:48:21	215.89	33.1138	2.25	27.316	31.449	1900-01-01 18:00:00	27	19.7
16:53:21	216.149	33.1631	2.33333	27.465	31.605	1900-01-01 19:00:00	28	19.1
16:58:21	215.879	33.1162	2.41667	27.59	31.761	1900-01-01 20:00:00	29	17.6
17:03:21	216.235	33.1631	2.5	27.74	31.891	1900-01-01 21:00:00	30	16
17:08:21	217.086	33.2968	2.58333	27.865	32.048	1900-01-01 22:00:00	31	15.8
17:13:21	217.614	33.3555	2.66667	27.99	32.204	1900-01-01 23:00:00	32	15.5
17:18:21	217.593	33.3555	2.75	28.14	32.361	1900-01-02	33	14.9
17:23:21	217.334	33.3015	2.83333	28.29	32.466	1900-01-02 01:00:00	34	14.8
17:28:21	217.291	33.3156	2.91667	28.39	32.597	1900-01-02 02:00:00	35	14.2
17:33:21	217.819	33.393	3	28.516	32.755	1900-01-02 03:00:00	36	13.5
17:38:21	218.11	33.4212	3.08333	28.642	32.86	1900-01-02 04:00:00	37	13.4
17:43:21	217.69	33.3578	3.16667	28.743	32.966	1900-01-02 05:00:00	38	12.8
17:48:21	218.347	33.454	3.25	28.869	33.098	1900-01-02 06:00:00	39	11.8
17:53:21	216.817	33.2358	3.33333	28.944	33.151	1900-01-02 07:00:00	40	10.8
17:58:21	216.084	33.1302	3.41667	29.045	33.204	1900-01-02 08:00:00	41	10.7
18:03:21	216.084	33.1208	3.5	29.121	33.283	1900-01-02 09:00:00	42	11.5
18:08:21	216.084	33.1208	3.58333	29.197	33.336	1900-01-02 10:00:00	43	11.7
18:13:21	215.664	33.0669	3.66667	29.273	33.416	1900-01-02 11:00:00	44	13.7
18:18:21	216.407	33.1772	3.75	29.324	33.495	1900-01-02 12:00:00	45	14.6
18:23:21	216.31	33.1607	3.83333	29.4	33.575	1900-01-02 13:00:00	46	14.7
18:28:21	216.31	33.1631	3.91667	29.476	33.628	1900-01-02 14:00:00	47	14.6
18:33:21	216.375	33.1584	4	29.552	33.708	1900-01-02 15:00:00	48	14.6
18:38:21	216.03	33.1162	4.08333	29.628	33.762	1900-01-02 16:00:00	49	14.5
18:43:21	216.138	33.1208	4.16667	29.679	33.842	1900-01-02 17:00:00	50	13.2
18:48:21	216.235	33.1537	4.25	29.755	33.922	1900-01-02 18:00:00	51	12.7
18:53:21	216.257	33.149	4.33333	29.806	33.975	1900-01-02 19:00:00	52	12.4
18:58:21	216.645	33.203	4.41667	29.882	34.055	1900-01-02 20:00:00	53	12.4
19:03:21	216.321	33.1537	4.5	29.959	34.109	1900-01-02 21:00:00	54	12.3
19:08:21	216.397	33.1772	4.58333	30.01	34.162	1900-01-02 22:00:00	55	12.4
19:13:21	216.289	33.1467	4.66667	30.061	34.243	1900-01-02 23:00:00	56	12.5
19:18:21	216.44	33.1701	4.75	30.137	34.27	1900-01-03	57	12.3
19:23:21	216.58	33.1912	4.83333	30.189	34.323	1900-01-03 01:00:00	58	12.4
19:28:21	216.688	33.2006	4.91667	30.24	34.404	1900-01-03 02:00:00	59	12
19:33:21	215.923	33.1021	5	30.316	34.458	1900-01-03 03:00:00	60	10.2
19:38:21	217.097	33.2827	5.08333	30.368	34.539	1900-01-03 04:00:00	61	9.9
19:43:21	216.742	33.2194	5.16667	30.419	34.565	1900-01-03 05:00:00	62	9.4
19:48:21	216.655	33.2053	5.25	30.47	34.646	1900-01-03 06:00:00	63	10.9
19:53:21	216.063	33.1302	5.33333	30.521	34.673	1900-01-03 07:00:00	64	11.4
19:58:21	216.095	33.1162	5.41667	30.573	34.7	1900-01-03 08:00:00	65	12.9
20:03:21	216.569	33.1912	5.5	30.624	34.781	1900-01-03 09:00:00	66	14.9
20:08:21	216.418	33.1631	5.58333	30.675	34.808	1900-01-03 10:00:00	67	16.8
20:13:21	215.912	33.0927	5.66667	30.727	34.862	1900-01-03 11:00:00	68	18.5
20:18:21	215.804	33.0903	5.75	30.778	34.889	1900-01-03 12:00:00	69	19.8
20:23:21	213.358	32.722	5.83333	30.804	34.835	1900-01-03 13:00:00	70	21.6
20:28:21	213.67	32.7736	5.91667	30.83	34.862	1900-01-03 14:00:00	71	22.6
20:33:21	213.746	32.7713	6	30.83	34.862	1900-01-03 15:00:00	72	23.2
20:38:21	213.724	32.7783	6.08333	30.855	34.889	1900-01-03 16:00:00	73	21.8
20:43:21	213.757	32.7853	6.16667	30.881	34.917	1900-01-03 17:00:00	74	21.5
20:48:21	213.692	32.783	6.25	30.881	34.944	1900-01-03 18:00:00	75	20
20:53:21	214.08	32.8276	6.33333	30.933	34.998	1900-01-03 19:00:00	76	18.7
20:58:21	214.274	32.8487	6.41667	30.958	35.025	1900-01-03 20:00:00	77	17.6
21:03:21	214.252	32.851	6.5	30.984	35.079	1900-01-03 21:00:00	78	17
21:08:21	214.5	32.8909	6.58333	31.01	35.106	1900-01-03 22:00:00	79	15.4
21:13:21	214.91	32.9425	6.66667	31.062	35.161	1900-01-03 23:00:00	80	13.3
21:18:21	214.963	32.9519	6.75	31.087	35.188	1900-01-04	81	13.4
21:23:21	215.298	33.0106	6.83333	31.139	35.242	1900-01-04 01:00:00	82	13.4
21:28:21	215.384	33.0129	6.91667	31.191	35.296	1900-01-04 02:00:00	83	12
21:33:21	215.114	32.9848	7	31.217	35.324	1900-01-04 03:00:00	84	11.8
21:38:21	215.082	32.973	7.08333	31.268	35.351	1900-01-04 04:00:00	85	11.9
21:43:21	215.513	33.0411	7.16667	31.32	35.433	1900-01-04 05:00:00	86	11.8
21:48:21	216.149	33.1279	7.25	31.346	35.487	1900-01-04 06:00:00	87	11.8
21:53:21	216.386	33.1678	7.33333	31.398	35.542	1900-01-04 07:00:00	88	12.2
21:58:21	216.731	33.217	7.41667	31.449	35.596	1900-01-04 08:00:00	89	12.4
22:03:21	216.677	33.2006	7.5	31.501	35.651	1900-01-04 09:00:00	90	12.9
22:08:21	216.515	33.1772	7.58333	31.553	35.678	1900-01-04 10:00:00	91	14.8
22:13:21	216.332	33.1513	7.66667	31.605	35.733	1900-01-04 11:00:00	92	15.1
22:18:21	216.731	33.2123	7.75	31.631	35.761	1900-01-04 12:00:00	93	16.1
22:23:21	217	33.2475	7.83333	31.657	35.815	1900-01-04 13:00:00	94	17.7
22:28:21	217.043	33.2499	7.91667	31.709	35.87	1900-01-04 14:00:00	95	17.8
22:33:21	216.989	33.2452	8	31.761	35.898	1900-01-04 15:00:00	96	16.7
22:38:21	217.065	33.2593	8.08333	31.813	35.953	1900-01-04 16:00:00	97	16.4
22:43:21	217.065	33.2569	8.16667	31.839	35.98	1900-01-04 17:00:00	98	17
22:48:21	217.561	33.3203	8.25	31.865	36.035	1900-01-04 18:00:00	99	16.9
22:53:21	216.677	33.2053	8.33333	31.917	36.063	1900-01-04 19:00:00	100	16.4
22:58:21	214.942	32.9496	8.41667	31.969	36.035	1900-01-04 20:00:00	101	15.4
23:03:21	214.597	32.9003	8.5	31.969	36.035	1900-01-04 21:00:00	102	15
23:08:21	213.422	32.722	8.58333	31.969	36.008	1900-01-04 22:00:00	103	14.9
23:13:21	213.444	32.7361	8.66667	31.969	35.98	1900-01-04 23:00:00	104	13.8
23:18:21	213.369	32.7197	8.75	31.969	35.98	1900-01-05	105	13.9
23:23:21	213.315	32.715	8.83333	31.969	35.98	1900-01-05 01:00:00	106	13.7
23:28:21	213.713	32.7713	8.91667	31.969	36.008	1900-01-05 02:00:00	107	13.3
23:33:21	214.252	32.844	9	31.969	36.035	1900-01-05 03:00:00	108	13
23:38:21	214.209	32.8463	9.08333	31.995	36.063	1900-01-05 04:00:00	109	13
23:43:21	214.532	32.8886	9.16667	32.021	36.09	1900-01-05 05:00:00	110	13.1
23:48:21	214.673	32.905	9.25	32.048	36.09	1900-01-05 06:00:00	111	12.8
23:53:21	214.576	32.9003	9.33333	32.074	36.145	1900-01-05 07:00:00	112	13.6
23:58:21	215.071	32.966	9.41667	32.1	36.173	1900-01-05 08:00:00	113	15
00:03:21	215.47	33.0223	9.5	32.126	36.2	1900-01-05 09:00:00	114	16.2
00:08:21	215.491	33.027	9.58333	32.152	36.255	1900-01-05 10:00:00	115	17.8
00:13:21	215.448	33.0153	9.66667	32.204	36.283	1900-01-05 11:00:00	116	18.6
00:18:21	215.06	32.9613	9.75	32.23	36.311	1900-01-05 12:00:00	117	18.7
00:23:21	215.384	33.0035	9.83333	32.257	36.338	1900-01-05 13:00:00	118	20.6
00:28:21	215.535	33.027	9.91667	32.283	36.366	1900-01-05 14:00:00	119	20.6
00:33:21	215.707	33.0598	10	32.309	36.421	1900-01-05 15:00:00	120	18.8
00:38:21	216.17	33.1208	10.0833	32.335	36.449	1900-01-05 16:00:00	121	17.7
00:43:21	216.321	33.142	10.1667	32.361	36.476	1900-01-05 17:00:00	122	18.7
00:48:21	216.537	33.1678	10.25	32.414	36.532	1900-01-05 18:00:00	123	17.4
00:53:21	216.795	33.2053	10.3333	32.44	36.587	1900-01-05 19:00:00	124	16.4
00:58:21	216.795	33.2053	10.4167	32.492	36.615	1900-01-05 20:00:00	125	15.9
01:03:21	217.151	33.2616	10.5	32.519	36.67	1900-01-05 21:00:00	126	15.5
01:08:21	214.769	32.9144	10.5833	32.545	36.615	1900-01-05 22:00:00	127	15.1
01:13:21	215.19	32.9777	10.6667	32.571	36.643	1900-01-05 23:00:00	128	15
01:18:21	214.974	32.9449	10.75	32.571	36.643	1900-01-06	129	14.8
01:23:21	215.147	32.9707	10.8333	32.597	36.67	1900-01-06 01:00:00	130	14.7
01:28:21	214.662	32.905	10.9167	32.597	36.67	1900-01-06 02:00:00	131	13.9
01:33:21	215.039	32.9566	11	32.624	36.698	1900-01-06 03:00:00	132	14.3
01:38:21	215.06	32.9637	11.0833	32.624	36.698	1900-01-06 04:00:00	133	14
01:43:21	215.319	32.9965	11.1667	32.65	36.726	1900-01-06 05:00:00	134	13.3
01:48:21	214.91	32.9378	11.25	32.65	36.726	1900-01-06 06:00:00	135	12.7
01:53:21	215.028	32.9543	11.3333	32.676	36.754	1900-01-06 07:00:00	136	12.3
01:58:21	215.007	32.9496	11.4167	32.702	36.754	1900-01-06 08:00:00	137	12.1
02:03:21	215.298	32.9871	11.5	32.702	36.809	1900-01-06 09:00:00	138	12.6
02:08:21	215.405	33.0082	11.5833	32.729	36.809	1900-01-06 10:00:00	139	12.2
02:13:21	215.502	33.02	11.6667	32.755	36.837	1900-01-06 11:00:00	140	13.1
02:18:21	215.545	33.027	11.75	32.781	36.865	1900-01-06 12:00:00	141	13.9
02:23:21	215.459	33.0129	11.8333	32.808	36.893	1900-01-06 13:00:00	142	14.5
02:28:21	215.491	33.0176	11.9167	32.834	36.921	1900-01-06 14:00:00	143	12.4
02:33:21	215.373	33.0012	12	32.834	36.921	1900-01-06 15:00:00	144	13
02:38:21	215.448	33.0035	12.0833	32.86	36.949	1900-01-06 16:00:00	145	13.3
02:43:21	215.362	32.9988	12.1667	32.887	36.976	1900-01-06 17:00:00	146	13.4
02:48:21	215.535	33.0223	12.25	32.913	36.976	1900-01-06 18:00:00	147	12.8
02:53:21	215.448	33.0059	12.3333	32.913	37.004	1900-01-06 19:00:00	148	11.7
02:58:21	215.427	33.0059	12.4167	32.94	37.032	1900-01-06 20:00:00	149	10.8
03:03:21	215.351	32.9965	12.5	32.966	37.032	1900-01-06 21:00:00	150	9.8
03:08:21	215.179	32.973	12.5833	32.966	37.032	1900-01-06 22:00:00	151	9.4
03:13:21	215.459	33.0059	12.6667	32.992	37.06	1900-01-06 23:00:00	152	9.1
03:18:21	215.384	32.9965	12.75	32.992	37.088	1900-01-07	153	8.9
03:23:21	215.632	33.034	12.8333	33.019	37.116	1900-01-07 01:00:00	154	8.8
03:28:21	215.621	33.0293	12.9167	33.045	37.144	1900-01-07 02:00:00	155	8.6
03:33:21	215.405	32.9965	13	33.072	37.172	1900-01-07 03:00:00	156	8.6
03:38:21	215.351	32.9942	13.0833	33.072	37.172	1900-01-07 04:00:00	157	8.4
03:43:21	215.642	33.0364	13.1667	33.098	37.2	1900-01-07 05:00:00	158	8.2
03:48:21	215.427	33.0035	13.25	33.124	37.2	1900-01-07 06:00:00	159	7.8
03:53:21	214.92	32.9308	13.3333	33.124	37.2	1900-01-07 07:00:00	160	8.2
03:58:21	215.298	32.9871	13.4167	33.151	37.228	1900-01-07 08:00:00	161	9.1
04:03:21	215.265	32.9777	13.5	33.151	37.256	1900-01-07 09:00:00	162	10.2
04:08:21	215.222	32.9707	13.5833	33.177	37.284	1900-01-07 10:00:00	163	12.2
04:13:21	215.168	32.966	13.6667	33.177	37.284	1900-01-07 11:00:00	164	13.3
04:18:21	215.125	32.9566	13.75	33.204	37.284	1900-01-07 12:00:00	165	14.3
04:23:21	215.222	32.9707	13.8333	33.204	37.312	1900-01-07 13:00:00	166	15.4
04:28:21	215.082	32.9519	13.9167	33.23	37.34	1900-01-07 14:00:00	167	16.2
04:33:21	215.19	32.9613	14	33.23	37.34	1900-01-07 15:00:00	168	17.4
04:38:21	214.974	32.9402	14.0833	33.257	37.34	1900-01-07 16:00:00	169	17.3
04:43:21	214.791	32.9097	14.1667	33.283	37.368	1900-01-07 17:00:00	170	17.6
04:48:21	214.769	32.9027	14.25	33.283	37.368	1900-01-07 18:00:00	171	16.8
04:53:21	214.931	32.9308	14.3333	33.283	37.368	1900-01-07 19:00:00	172	16
04:58:21	214.317	32.844	14.4167	33.31	37.368	1900-01-07 20:00:00	173	14.5
05:03:21	214.069	32.8041	14.5	33.31	37.368	1900-01-07 21:00:00	174	12.9
05:08:21	213.487	32.7173	14.5833	33.31	37.368	1900-01-07 22:00:00	175	12.2
05:13:21	213.455	32.722	14.6667	33.31	37.34	1900-01-07 23:00:00	176	11.6
05:18:21	213.369	32.6938	14.75	33.31	37.34	1900-01-08	177	11.3
05:23:21	213.466	32.7197	14.8333	33.31	37.34	1900-01-08 01:00:00	178	10.8
05:28:21	213.401	32.7103	14.9167	33.31	37.34	1900-01-08 02:00:00	179	10
05:33:21	214.198	32.8229	15	33.31	37.396	1900-01-08 03:00:00	180	10.1
05:38:21	214.338	32.8463	15.0833	33.336	37.396	1900-01-08 04:00:00	181	10.4
05:43:21	214.673	32.8956	15.1667	33.363	37.424	1900-01-08 05:00:00	182	11.3
05:48:21	214.274	32.8299	15.25	33.363	37.452	1900-01-08 06:00:00	183	12.5
05:53:21	214.274	32.8323	15.3333	33.389	37.452	1900-01-08 07:00:00	184	13.4
05:58:21	214.274	32.844	15.4167	33.389	37.48	1900-01-08 08:00:00	185	15.4
06:03:21	214.188	32.8276	15.5	33.416	37.48	1900-01-08 09:00:00	186	16.9
06:08:21	213.961	32.79	15.5833	33.416	37.48	1900-01-08 10:00:00	187	17.9
06:13:21	213.358	32.7009	15.6667	33.442	37.48	1900-01-08 11:00:00	188	19.3
06:18:21	213.649	32.7478	15.75	33.442	37.48	1900-01-08 12:00:00	189	20.2
06:23:21	213.627	32.7431	15.8333	33.442	37.48	1900-01-08 13:00:00	190	21.9
06:28:21	213.616	32.7408	15.9167	33.442	37.48	1900-01-08 14:00:00	191	22.2
06:33:21	213.153	32.6657	16	33.442	37.48	1900-01-08 15:00:00	192	22.1
06:38:21	212.97	32.6493	16.0833	33.469	37.48			22.7
06:43:21	212.679	32.6	16.1667	33.442	37.48			22.6
06:48:21	212.022	32.5038	16.25	33.469	37.452			21.7
06:53:21	211.213	32.3982	16.3333	33.442	37.424			19.7
06:58:21	213.358	32.7103	16.4167	33.442	37.48			18.8
07:03:21	213.918	32.7807	16.5	33.442	37.48			18.2
07:08:21	212.938	32.6375	16.5833	33.469	37.508			17.7
07:13:21	212.442	32.5625	16.6667	33.469	37.48			16.7
07:18:21	212.787	32.6047	16.75	33.495	37.508			16.2
07:23:21	212.679	32.6023	16.8333	33.495	37.508
07:28:21	212.205	32.5273	16.9167	33.495	37.508
07:33:21	211.58	32.4522	17	33.495	37.48
07:38:21	211.235	32.3912	17.0833	33.495	37.48
07:43:21	211.968	32.5108	17.1667	33.495	37.48
07:48:21	212.679	32.6047	17.25	33.469	37.508
07:53:21	211.903	32.5108	17.3333	33.495	37.48
07:58:21	211.709	32.4827	17.4167	33.495	37.508
08:03:21	212.269	32.5484	17.5	33.522	37.508
08:08:21	211.903	32.5085	17.5833	33.522	37.508
08:13:21	210.373	32.2739	17.6667	33.522	37.48
08:18:21	210.728	32.3325	17.75	33.522	37.48
08:23:21	211.666	32.4663	17.8333	33.495	37.48
08:28:21	213.983	32.7947	17.9167	33.522	37.593
08:33:21	213.8	32.7666	18	33.549	37.593
08:38:21	213.8	32.7525	18.0833	33.575	37.621
08:43:21	213.519	32.7173	18.1667	33.602	37.649
08:48:21	213.207	32.6798	18.25	33.628	37.677
08:53:21	212.808	32.6375	18.3333	33.655	37.677
08:58:21	213.218	32.6751	18.4167	33.655	37.677
09:03:21	213.315	32.7103	18.5	33.655	37.705
09:08:21	213.185	32.6774	18.5833	33.682	37.734
09:13:21	213.422	32.722	18.6667	33.708	37.734
09:18:21	213.422	32.7103	18.75	33.708	37.762
09:23:21	213.132	32.6587	18.8333	33.735	37.762
09:28:21	213.024	32.654	18.9167	33.735	37.762
09:33:21	213.422	32.7103	19	33.735	37.79
09:38:21	213.315	32.6962	19.0833	33.762	37.79
09:43:21	213.228	32.6798	19.1667	33.788	37.818
09:48:21	212.765	32.6094	19.25	33.788	37.818
09:53:21	212.948	32.6328	19.3333	33.788	37.818
09:58:21	212.851	32.6164	19.4167	33.788	37.818
10:03:21	213.035	32.6422	19.5	33.815	37.846
10:08:21	213.466	32.7056	19.5833	33.815	37.846
10:13:21	213.422	32.7103	19.6667	33.842	37.875
10:18:21	213.616	32.7455	19.75	33.842	37.903
10:23:21	213.487	32.7243	19.8333	33.868	37.903
10:28:21	213.024	32.6633	19.9167	33.868	37.903
10:33:21	212.819	32.6235	20	33.895	37.903
10:38:21	212.69	32.6117	20.0833	33.868	37.875
10:43:21	212.927	32.6563	20.1667	33.895	37.903
10:48:21	213.164	32.6962	20.25	33.922	37.931
10:53:21	213.153	32.6868	20.3333	33.922	37.931
10:58:21	212.787	32.6493	20.4167	33.948	37.96
11:03:21	213.315	32.7103	20.5	33.975	37.988
11:08:21	213.25	32.7032	20.5833	33.975	37.988
11:13:21	213.778	32.7736	20.6667	34.002	38.045
11:18:21	214.123	32.8229	20.75	34.055	38.101
11:23:21	213.627	32.7455	20.8333	34.055	38.101
11:28:21	213.713	32.7619	20.9167	34.082	38.101
11:33:21	214.166	32.8393	21	34.109	38.158
11:38:21	214.263	32.8346	21.0833	34.136	38.186
11:43:21	214.435	32.8815	21.1667	34.162	38.215
11:48:21	215.017	32.9449	21.25	34.162	38.243
11:53:21	215.093	32.959	21.3333	34.216	38.272
11:58:21	215.179	32.9918	21.4167	34.243	38.329
12:03:21	215.599	33.0317	21.5	34.27	38.357
12:08:21	215.729	33.0552	21.5833	34.297	38.386
12:13:21	215.513	33.0012	21.6667	34.323	38.414
12:18:21	215.858	33.0692	21.75	34.35	38.471
12:23:21	215.944	33.0927	21.8333	34.377	38.5
12:28:21	216.321	33.1373	21.9167	34.404	38.528
12:33:21	216.515	33.1607	22	34.431	38.557
12:38:21	216.321	33.1326	22.0833	34.458	38.585
12:43:21	215.847	33.0645	22.1667	34.485	38.585
12:48:21	216.063	33.0974	22.25	34.512	38.642
12:53:21	216.418	33.149	22.3333	34.539	38.642
12:58:21	215.826	33.0833	22.4167	34.565	38.671
13:03:21	215.718	33.0387	22.5	34.565	38.671
13:08:21	216.041	33.0857	22.5833	34.592	38.7
13:13:21	216.073	33.0997	22.6667	34.592	38.7
13:18:21	216.03	33.088	22.75	34.619	38.728
13:23:21	216.224	33.1302	22.8333	34.619	38.757
13:28:21	216.224	33.1255	22.9167	34.646	38.757
13:33:21	216.181	33.1044	23	34.673	38.786
13:38:21	216.569	33.1701	23.0833	34.673	38.814
13:43:21	216.655	33.1772	23.1667	34.7	38.814
13:48:21	216.548	33.1795	23.25	34.727	38.843
13:53:21	216.645	33.1865	23.3333	34.727	38.872
13:58:21	216.742	33.1983	23.4167	34.754	38.872
14:03:21	216.267	33.1185	23.5	34.781	38.9
14:08:21	216.849	33.21	23.5833	34.781	38.929
14:13:21	216.494	33.1678	23.6667	34.808	38.929
14:18:21	217.022	33.2358	23.75	34.835	38.958
14:23:21	217.388	33.2827	23.8333	34.835	38.987
14:28:21	217.367	33.2757	23.9167	34.862	39.016
14:33:21	216.968	33.2311	24	34.889	39.016
14:38:21	216.774	33.1912	24.0833	34.889	39.044
14:43:21	217.194	33.2475	24.1667	34.917	39.044
14:48:21	217.345	33.278	24.25	34.917	39.073
14:53:21	218.013	33.3695	24.3333	34.944	39.102
14:58:21	217.97	33.3578	24.4167	34.971	39.16
15:03:21	217.862	33.3555	24.5	34.998	39.16
15:08:21	216.677	33.1772	24.5833	35.025	39.16
15:13:21	215.19	32.9777	24.6667	35.025	39.102
15:18:21	215.362	32.9871	24.75	35.025	39.102
15:23:21	215.373	32.9965	24.8333	34.998	39.102
15:28:21	215.621	33.0317	24.9167	34.998	39.102
15:33:21	215.739	33.0247	25	34.998	39.102
15:38:21	215.448	33.0035	25.0833	34.998	39.073
15:43:21	215.815	33.0575	25.1667	34.998	39.102
15:48:21	215.793	33.0505	25.25	34.998	39.102
15:53:21	216.02	33.088	25.3333	34.998	39.102
15:58:21	215.89	33.0763	25.4167	35.025	39.131
16:03:21	215.923	33.0552	25.5	35.025	39.131
16:08:21	216.192	33.1068	25.5833	35.025	39.16
16:13:21	216.149	33.1044	25.6667	35.052	39.16
16:18:21	216.138	33.1044	25.75	35.052	39.16
16:23:21	216.645	33.1701	25.8333	35.052	39.188
16:28:21	216.946	33.21	25.9167	35.079	39.217
16:33:21	216.494	33.1678	26	35.106	39.217
16:38:21	216.235	33.1255	26.0833	35.106	39.217
16:43:21	216.213	33.1115	26.1667	35.106	39.217
16:48:21	216.073	33.0857	26.25	35.133	39.246
16:53:21	216.397	33.1396	26.3333	35.133	39.246
16:58:21	216.321	33.1279	26.4167	35.133	39.275
17:03:21	216.063	33.0903	26.5	35.161	39.275
17:08:21	215.696	33.0364	26.5833	35.161	39.246
17:13:21	213.541	32.729	26.6667	35.161	39.188
17:18:21	213.94	32.7877	26.75	35.161	39.188
17:23:21	213.907	32.7877	26.8333	35.106	39.16
17:28:21	213.961	32.7853	26.9167	35.106	39.131
17:33:21	214.317	32.8463	27	35.106	39.16
17:38:21	214.662	32.8862	27.0833	35.079	39.16
17:43:21	215.007	32.9355	27.1667	35.079	39.16
17:48:21	214.856	32.9097	27.25	35.106	39.16
17:53:21	214.813	32.9073	27.3333	35.106	39.188
17:58:21	214.834	32.9167	27.4167	35.106	39.188
18:03:21	215.233	32.9683	27.5	35.133	39.188
18:08:21	215.502	33.0082	27.5833	35.133	39.217
18:13:21	215.729	33.0434	27.6667	35.133	39.246
18:18:21	215.718	33.0411	27.75	35.161	39.246
18:23:21	215.416	32.9918	27.8333	35.161	39.246
18:28:21	215.761	33.0434	27.9167	35.188	39.275
18:33:21	216.267	33.1232	28	35.188	39.304
18:38:21	216.084	33.0974	28.0833	35.215	39.304
18:43:21	216.052	33.088	28.1667	35.242	39.333
18:48:21	216.526	33.1584	28.25	35.242	39.362
18:53:21	216.569	33.1631	28.3333	35.269	39.362
18:58:21	216.472	33.142	28.4167	35.269	39.391
19:03:21	216.095	33.0903	28.5	35.296	39.391
19:08:21	216.138	33.0997	28.5833	35.296	39.391
19:13:21	216.354	33.1373	28.6667	35.324	39.42
19:18:21	216.397	33.1396	28.75	35.324	39.42
19:23:21	216.515	33.1631	28.8333	35.351	39.449
19:28:21	216.795	33.1983	28.9167	35.351	39.478
19:33:21	216.806	33.1959	29	35.351	39.478
19:38:21	217.248	33.264	29.0833	35.378	39.507
19:43:21	217.237	33.264	29.1667	35.405	39.536
19:48:21	217.205	33.2522	29.25	35.405	39.565
19:53:21	216.979	33.2241	29.3333	35.433	39.565
19:58:21	217.108	33.2405	29.4167	35.46	39.594
20:03:21	216.181	33.1068	29.5	35.46	39.565
20:08:21	214.694	32.898	29.5833	35.46	39.536
20:13:21	214.522	32.8675	29.6667	35.46	39.507
20:18:21	214.662	32.8862	29.75	35.433	39.478
20:23:21	214.931	32.9238	29.8333	35.405	39.478
20:28:21	214.834	32.9073	29.9167	35.405	39.478
20:33:21	214.554	32.8792	30	35.405	39.449
20:38:21	214.91	32.9191	30.0833	35.405	39.449
20:43:21	215.071	32.9543	30.1667	35.405	39.449
20:48:21	215.438	32.9988	30.25	35.405	39.536
20:53:21	214.705	32.8956	30.3333	35.405	39.565
20:58:21	214.198	32.8229	30.4167	35.405	39.565
21:03:21	214.349	32.8417	30.5	35.405	39.536
21:08:21	214.629	32.8839	30.5833	35.378	39.565
21:13:21	215.028	32.9402	30.6667	35.378	39.565
21:18:21	214.92	32.9238	30.75	35.405	39.565
21:23:21	215.405	32.9895	30.8333	35.405	39.594
21:28:21	215.502	33.0129	30.9167	35.405	39.594
21:33:21	215.642	33.027	31	35.433	39.623
21:38:21	215.772	33.0434	31.0833	35.433	39.565
21:43:21	215.491	33.0059	31.1667	35.46	39.478
21:48:21	215.567	33.02	31.25	35.46	39.478
21:53:21	215.556	33.0153	31.3333	35.46	39.507
21:58:21	215.233	32.9707	31.4167	35.487	39.507
22:03:21	215.416	33.0012	31.5	35.487	39.507
22:08:21	216.149	33.1044	31.5833	35.487	39.536
22:13:21	216.289	33.1279	31.6667	35.487	39.536
22:18:21	216.117	33.0927	31.75	35.515	39.565
22:23:21	216.181	33.1091	31.8333	35.515	39.565
22:28:21	215.804	33.0505	31.9167	35.542	39.565
22:33:21	215.89	33.0645	32	35.542	39.565
22:38:21	216.418	33.1396	32.0833	35.542	39.594
22:43:21	216.806	33.1959	32.1667	35.569	39.623
22:48:21	216.655	33.1701	32.25	35.596	39.652
22:53:21	216.472	33.1467	32.3333	35.596	39.652
22:58:21	216.569	33.1607	32.4167	35.596	39.652
23:03:21	217.14	33.2405	32.5	35.624	39.681
23:08:21	217.097	33.2358	32.5833	35.651	39.71
23:13:21	217.054	33.2288	32.6667	35.651	39.71
23:18:21	217.032	33.2241	32.75	35.678	39.739
23:23:21	216.548	33.156	32.8333	35.678	39.739
23:28:21	216.645	33.1725	32.9167	35.678	39.739
23:33:21	216.914	33.21	33	35.706	39.739
23:38:21	216.731	33.1818	33.0833	35.706	39.768
23:43:21	217.065	33.2264	33.1667	35.706	39.768
23:48:21	217.065	33.2241	33.25	35.733	39.798
23:53:21	216.957	33.217	33.3333	35.733	39.798
23:58:21	216.936	33.2123	33.4167	35.733	39.798
00:03:21	217.119	33.2358	33.5	35.761	39.827
00:08:21	216.979	33.2194	33.5833	35.761	39.827
00:13:21	214.306	32.8323	33.6667	35.788	39.739
00:18:21	214.543	32.8604	33.75	35.761	39.739
00:23:21	214.597	32.8792	33.8333	35.733	39.71
00:28:21	214.673	32.8839	33.9167	35.706	39.71
00:33:21	214.64	32.8815	34	35.706	39.681
00:38:21	214.565	32.8722	34.0833	35.706	39.681
00:43:21	214.425	32.851	34.1667	35.678	39.652
00:48:21	214.608	32.8792	34.25	35.678	39.652
00:53:21	214.748	32.9027	34.3333	35.678	39.652
00:58:21	214.586	32.8768	34.4167	35.678	39.652
01:03:21	214.263	32.8276	34.5	35.678	39.652
01:08:21	214.414	32.8487	34.5833	35.678	39.652
01:13:21	214.446	32.8557	34.6667	35.651	39.652
01:18:21	214.403	32.8487	34.75	35.651	39.623
01:23:21	214.209	32.8205	34.8333	35.678	39.623
01:28:21	214.285	32.8323	34.9167	35.651	39.623
01:33:21	213.983	32.7877	35	35.651	39.623
01:38:21	214.047	32.7971	35.0833	35.651	39.623
01:43:21	213.81	32.7572	35.1667	35.651	39.623
01:48:21	213.347	32.7032	35.25	35.651	39.594
01:53:21	212.991	32.654	35.3333	35.624	39.565
01:58:21	212.905	32.6375	35.4167	35.624	39.536
02:03:21	213.185	32.6704	35.5	35.596	39.536
02:08:21	213.239	32.6774	35.5833	35.596	39.536
02:13:21	212.539	32.5812	35.6667	35.596	39.507
02:18:21	212.83	32.6258	35.75	35.596	39.507
02:23:21	213.132	32.6704	35.8333	35.569	39.507
02:28:21	213.412	32.7079	35.9167	35.569	39.536
02:33:21	213.218	32.6798	36	35.569	39.507
02:38:21	213.315	32.6845	36.0833	35.596	39.536
02:43:21	213.39	32.7032	36.1667	35.569	39.536
02:48:21	213.282	32.6962	36.25	35.596	39.536
02:53:21	212.927	32.6469	36.3333	35.596	39.536
02:58:21	213.035	32.6493	36.4167	35.596	39.507
03:03:21	212.991	32.6446	36.5	35.596	39.507
03:08:21	213.509	32.7243	36.5833	35.569	39.536
03:13:21	213.11	32.6704	36.6667	35.596	39.536
03:18:21	212.959	32.6422	36.75	35.596	39.536
03:23:21	212.388	32.5554	36.8333	35.596	39.507
03:28:21	211.537	32.4264	36.9167	35.569	39.478
03:33:21	211.558	32.4545	37	35.569	39.449
03:38:21	211.763	32.471	37.0833	35.542	39.449
03:43:21	212.733	32.6188	37.1667	35.542	39.449
03:48:21	213.595	32.7384	37.25	35.515	39.478
03:53:21	212.647	32.5977	37.3333	35.542	39.449
03:58:21	211.817	32.478	37.4167	35.569	39.449
04:03:21	211.72	32.4686	37.5	35.542	39.449
04:08:21	211.72	32.4639	37.5833	35.542	39.42
04:13:21	214.037	32.79	37.6667	35.515	39.478
04:18:21	213.638	32.7408	37.75	35.542	39.478
04:23:21	213.132	32.6798	37.8333	35.569	39.507
04:28:21	212.873	32.6258	37.9167	35.569	39.507
04:33:21	212.506	32.6	38	35.569	39.478
04:38:21	212.948	32.6305	38.0833	35.569	39.507
04:43:21	213.013	32.6446	38.1667	35.569	39.507
04:48:21	212.377	32.5601	38.25	35.569	39.478
04:53:21	211.612	32.4428	38.3333	35.569	39.449
04:58:21	212.625	32.5977	38.4167	35.569	39.478
05:03:21	213.401	32.6962	38.5	35.542	39.478
05:08:21	213.379	32.6915	38.5833	35.569	39.507
05:13:21	213.746	32.7384	38.6667	35.569	39.536
05:18:21	213.703	32.7408	38.75	35.596	39.536
05:23:21	213.746	32.7572	38.8333	35.596	39.565
05:28:21	213.035	32.661	38.9167	35.624	39.536
05:33:21	212.97	32.6469	39	35.624	39.565
05:38:21	213.185	32.6774	39.0833	35.624	39.565
05:43:21	212.797	32.6117	39.1667	35.624	39.565
05:48:21	211.44	32.424	39.25	35.624	39.507
05:53:21	211.741	32.4639	39.3333	35.596	39.507
05:58:21	212.506	32.5718	39.4167	35.596	39.507
06:03:21	212.388	32.5531	39.5	35.596	39.507
06:08:21	212.399	32.5578	39.5833	35.596	39.507
06:13:21	211.935	32.4874	39.6667	35.596	39.507
06:18:21	211.817	32.4827	39.75	35.596	39.478
06:23:21	211.774	32.4733	39.8333	35.596	39.507
06:28:21	212.56	32.5695	39.9167	35.569	39.507
06:33:21	212.162	32.5202	40	35.596	39.507
06:38:21	211.763	32.478	40.0833	35.596	39.478
06:43:21	211.687	32.4686	40.1667	35.596	39.478
06:48:21	211.655	32.4522	40.25	35.596	39.478
06:53:21	211.569	32.4311	40.3333	35.596	39.478
06:58:21	211.429	32.4311	40.4167	35.569	39.449
07:03:21	211.655	32.4569	40.5	35.569	39.449
07:08:21	211.17	32.3865	40.5833	35.569	39.449
07:13:21	210.513	32.2903	40.6667	35.569	39.42
07:18:21	210.297	32.2575	40.75	35.542	39.391
07:23:21	210.416	32.2856	40.8333	35.542	39.391
07:28:21	210.114	32.2293	40.9167	35.515	39.362
07:33:21	210.696	32.3138	41	35.515	39.362
07:38:21	211.138	32.3912	41.0833	35.515	39.391
07:43:21	211.472	32.4381	41.1667	35.515	39.391
07:48:21	211.397	32.417	41.25	35.515	39.391
07:53:21	211.192	32.3935	41.3333	35.515	39.391
07:58:21	210.696	32.3208	41.4167	35.542	39.391
08:03:21	210.912	32.3513	41.5	35.515	39.391
08:08:21	210.718	32.3208	41.5833	35.515	39.391
08:13:21	211.084	32.3654	41.6667	35.515	39.391
08:18:21	210.987	32.356	41.75	35.515	39.391
08:23:21	211.095	32.3748	41.8333	35.515	39.391
08:28:21	210.955	32.356	41.9167	35.515	39.391
08:33:21	210.933	32.3537	42	35.515	39.391
08:38:21	211.494	32.4334	42.0833	35.542	39.42
08:43:21	212.119	32.5132	42.1667	35.542	39.42
08:48:21	212.905	32.6352	42.25	35.542	39.478
08:53:21	212.517	32.5765	42.3333	35.569	39.478
08:58:21	212.56	32.5906	42.4167	35.596	39.507
09:03:21	212.593	32.5906	42.5	35.596	39.507
09:08:21	212.42	32.5625	42.5833	35.624	39.536
09:13:21	212.744	32.6164	42.6667	35.624	39.536
09:18:21	212.668	32.6	42.75	35.651	39.565
09:23:21	212.959	32.6422	42.8333	35.651	39.565
09:28:21	213.056	32.6563	42.9167	35.651	39.594
09:33:21	212.636	32.5953	43	35.678	39.594
09:38:21	212.765	32.6023	43.0833	35.678	39.594
09:43:21	212.884	32.6375	43.1667	35.678	39.623
09:48:21	213.035	32.661	43.25	35.706	39.623
09:53:21	212.668	32.6047	43.3333	35.706	39.623
09:58:21	213.11	32.6657	43.4167	35.706	39.652
10:03:21	213.185	32.6727	43.5	35.733	39.652
10:08:21	213.185	32.6798	43.5833	35.733	39.681
10:13:21	213.476	32.722	43.6667	35.761	39.71
10:18:21	213.66	32.7384	43.75	35.761	39.71
10:23:21	213.864	32.7783	43.8333	35.761	39.739
10:28:21	214.328	32.8463	43.9167	35.788	39.768
10:33:21	214.155	32.8088	44	35.815	39.768
10:38:21	214.112	32.8065	44.0833	35.815	39.798
10:43:21	214.597	32.8698	44.1667	35.843	39.827
10:48:21	214.608	32.8839	44.25	35.843	39.827
10:53:21	214.295	32.8252	44.3333	35.87	39.856
10:58:21	213.66	32.7361	44.4167	35.898	39.856
11:03:21	212.873	32.6305	44.5	35.898	39.827
11:08:21	213.325	32.6915	44.5833	35.898	39.827
11:13:21	213.422	32.7103	44.6667	35.87	39.827
11:18:21	213.53	32.7173	44.75	35.87	39.827
11:23:21	213.66	32.7314	44.8333	35.898	39.827
11:28:21	213.843	32.7619	44.9167	35.898	39.827
11:33:21	213.886	32.7713	45	35.898	39.856
11:38:21	214.425	32.844	45.0833	35.898	39.885
11:43:21	214.306	32.8346	45.1667	35.925	39.885
11:48:21	214.489	32.8604	45.25	35.925	39.914
11:53:21	215.125	32.9425	45.3333	35.953	39.943
11:58:21	215.265	32.966	45.4167	35.953	39.973
12:03:21	215.028	32.9378	45.5	35.98	39.973
12:08:21	214.953	32.9425	45.5833	36.008	39.973
12:13:21	215.319	32.9707	45.6667	36.008	40.031
12:18:21	215.545	33.0106	45.75	36.035	40.031
12:23:21	215.707	33.0317	45.8333	36.063	40.06
12:28:21	215.545	33.0129	45.9167	36.063	40.09
12:33:21	215.632	33.0176	46	36.09	40.09
12:38:21	216.03	33.088	46.0833	36.09	40.119
12:43:21	216.009	33.0716	46.1667	36.118	40.148
12:48:21	216.257	33.1115	46.25	36.118	40.178
12:53:21	216.558	33.1584	46.3333	36.145	40.207
12:58:21	216.892	33.203	46.4167	36.173	40.207
13:03:21	217.043	33.2123	46.5	36.2	40.236
13:08:21	216.903	33.1889	46.5833	36.228	40.266
13:13:21	217.011	33.21	46.6667	36.228	40.295
13:18:21	217.032	33.2217	46.75	36.255	40.325
13:23:21	217.032	33.217	46.8333	36.283	40.325
13:28:21	217.323	33.264	46.9167	36.283	40.354
13:33:21	217.194	33.2335	47	36.311	40.354
13:38:21	217.14	33.2241	47.0833	36.311	40.383
13:43:21	217.55	33.2921	47.1667	36.338	40.413
13:48:21	217.701	33.3156	47.25	36.338	40.442
13:53:21	217.647	33.3109	47.3333	36.366	40.442
13:58:21	217.69	33.2992	47.4167	36.393	40.472
14:03:21	217.356	33.2616	47.5	36.393	40.472
14:08:21	217.323	33.2546	47.5833	36.421	40.472
14:13:21	216.925	33.1983	47.6667	36.421	40.472
14:18:21	216.795	33.1772	47.75	36.421	40.472
14:23:21	217.561	33.2992	47.8333	36.421	40.501
14:28:21	217.539	33.278	47.9167	36.421	40.501
14:33:21	217.356	33.2616	48	36.449	40.531
14:38:21	217.733	33.3203	48.0833	36.449	40.56
14:43:21	217.97	33.3578	48.1667	36.449	40.56
14:48:21	217.83	33.3484	48.25	36.476	40.56
14:53:21	217.097	33.2358	48.3333	36.504	40.56
14:58:21	214.823	32.9027	48.4167	36.504	40.501
15:03:21	215.524	32.9988	48.5	36.476	40.501
15:08:21	215.782	33.0434	48.5833	36.449	40.472
15:13:21	215.459	32.9871	48.6667	36.449	40.472
15:18:21	215.254	32.9543	48.75	36.421	40.442
15:23:21	215.405	32.9801	48.8333	36.421	40.442
15:28:21	215.599	33.0129	48.9167	36.421	40.442
15:33:21	215.405	32.9918	49	36.421	40.413
15:38:21	215.513	33.0059	49.0833	36.421	40.442
15:43:21	215.901	33.0434	49.1667	36.421	40.442
15:48:21	216.03	33.0763	49.25	36.421	40.442
15:53:21	215.772	33.0364	49.3333	36.421	40.442
15:58:21	215.276	32.9637	49.4167	36.421	40.442
16:03:21	215.416	32.9824	49.5	36.421	40.442
16:08:21	215.136	32.9472	49.5833	36.421	40.413
16:13:21	215.438	32.9824	49.6667	36.421	40.413
16:18:21	215.362	32.9637	49.75	36.421	40.442
16:23:21	215.599	33.0012	49.8333	36.421	40.442
16:28:21	215.545	33.0106	49.9167	36.421	40.442
16:33:21	215.61	32.9965	50	36.421	40.442
16:38:21	215.815	33.0364	50.0833	36.421	40.442
16:43:21	215.664	33.0223	50.1667	36.449	40.472
16:48:21	215.632	33.0153	50.25	36.449	40.472
16:53:21	216.192	33.0997	50.3333	36.449	40.472
16:58:21	216.267	33.1021	50.4167	36.449	40.501
17:03:21	216.375	33.1208	50.5	36.476	40.501
17:08:21	215.642	33.0129	50.5833	36.476	40.501
17:13:21	214.317	32.8229	50.6667	36.476	40.442
17:18:21	214.468	32.8393	50.75	36.449	40.442
17:23:21	214.382	32.8346	50.8333	36.449	40.442
17:28:21	214.166	32.8065	50.9167	36.449	40.413
17:33:21	214.198	32.8088	51	36.421	40.383
17:38:21	214.198	32.8088	51.0833	36.421	40.383
17:43:21	214.446	32.8393	51.1667	36.421	40.383
17:48:21	214.629	32.8722	51.25	36.393	40.383
17:53:21	214.306	32.8158	51.3333	36.393	40.383
17:58:21	214.457	32.8463	51.4167	36.393	40.383
18:03:21	214.888	32.9144	51.5	36.393	40.383
18:08:21	215.395	32.9824	51.5833	36.393	40.413
18:13:21	215.696	33.0223	51.6667	36.421	40.442
18:18:21	215.578	33.0082	51.75	36.421	40.442
18:23:21	215.815	33.0481	51.8333	36.449	40.472
18:28:21	215.976	33.0645	51.9167	36.449	40.472
18:33:21	216.181	33.0974	52	36.476	40.501
18:38:21	216.063	33.0833	52.0833	36.476	40.501
18:43:21	216.084	33.0786	52.1667	36.504	40.531
18:48:21	216.645	33.1607	52.25	36.504	40.56
18:53:21	216.354	33.1208	52.3333	36.532	40.56
18:58:21	215.944	33.0622	52.4167	36.532	40.56
19:03:21	215.642	33.0082	52.5	36.532	40.56
19:08:21	215.427	32.9895	52.5833	36.532	40.56
19:13:21	215.599	33.0129	52.6667	36.532	40.56
19:18:21	215.502	32.9988	52.75	36.532	40.56
19:23:21	215.664	33.0223	52.8333	36.532	40.59
19:28:21	216.063	33.0716	52.9167	36.532	40.59
19:33:21	216.354	33.1255	53	36.532	40.619
19:38:21	216.698	33.1701	53.0833	36.56	40.649
19:43:21	216.828	33.1889	53.1667	36.56	40.649
19:48:21	216.936	33.21	53.25	36.587	40.679
19:53:21	217.27	33.2522	53.3333	36.587	40.708
19:58:21	217.183	33.2429	53.4167	36.615	40.708
20:03:21	216.289	33.1115	53.5	36.643	40.708
20:08:21	216.343	33.1255	53.5833	36.643	40.708
20:13:21	216.397	33.1302	53.6667	36.643	40.708
20:18:21	216.72	33.1772	53.75	36.643	40.708
20:23:21	216.375	33.1302	53.8333	36.643	40.708
20:28:21	216.763	33.1795	53.9167	36.67	40.708
20:33:21	217.226	33.2569	54	36.67	40.738
20:38:21	217.733	33.3179	54.0833	36.67	40.767
20:43:21	217.453	33.2804	54.1667	36.698	40.767
20:48:21	215.502	33.0035	54.25	36.726	40.738
20:53:21	215.254	32.9683	54.3333	36.698	40.708
20:58:21	215.707	33.0293	54.4167	36.698	40.708
21:03:21	215.955	33.0669	54.5	36.67	40.708
21:08:21	215.836	33.0552	54.5833	36.67	40.708
21:13:21	215.642	33.0223	54.6667	36.67	40.708
21:18:21	215.653	33.0247	54.75	36.67	40.708
21:23:21	215.793	33.0458	54.8333	36.67	40.708
21:28:21	216.106	33.0903	54.9167	36.67	40.708
21:33:21	216.461	33.1467	55	36.67	40.708
21:38:21	216.612	33.1631	55.0833	36.698	40.738
21:43:21	216.763	33.1842	55.1667	36.698	40.738
21:48:21	216.526	33.1513	55.25	36.726	40.767
21:53:21	216.494	33.142	55.3333	36.726	40.767
21:58:21	216.084	33.0833	55.4167	36.726	40.767
22:03:21	216.181	33.0974	55.5	36.726	40.767
22:08:21	216.332	33.1255	55.5833	36.726	40.767
22:13:21	216.806	33.1959	55.6667	36.726	40.797
22:18:21	216.989	33.2123	55.75	36.726	40.797
22:23:21	216.903	33.1983	55.8333	36.754	40.797
22:28:21	216.429	33.1349	55.9167	36.754	40.797
22:33:21	216.634	33.1654	56	36.782	40.827
22:38:21	216.892	33.203	56.0833	36.754	40.827
22:43:21	217.043	33.2241	56.1667	36.782	40.827
22:48:21	217.226	33.2475	56.25	36.782	40.856
22:53:21	217	33.2194	56.3333	36.809	40.856
22:58:21	216.882	33.1983	56.4167	36.809	40.856
23:03:21	217.205	33.2452	56.5	36.809	40.856
23:08:21	217.345	33.2687	56.5833	36.809	40.886
23:13:21	217.431	33.2757	56.6667	36.837	40.916
23:18:21	217.259	33.2522	56.75	36.837	40.886
23:23:21	217.377	33.2687	56.8333	36.865	40.916
23:28:21	217.108	33.2311	56.9167	36.865	40.916
23:33:21	214.468	32.8534	57	36.865	40.827
23:38:21	214.392	32.844	57.0833	36.837	40.797
23:43:21	214.64	32.8768	57.1667	36.809	40.797
23:48:21	214.349	32.8276	57.25	36.782	40.767
23:53:21	214.489	32.8534	57.3333	36.782	40.738
23:58:21	214.22	32.8135	57.4167	36.754	40.708
00:03:21	214.058	32.7947	57.5	36.726	40.679
00:08:21	214.252	32.8182	57.5833	36.726	40.679
00:13:21	214.403	32.8417	57.6667	36.698	40.679
00:18:21	214.285	32.8252	57.75	36.698	40.649
00:23:21	214.263	32.8229	57.8333	36.698	40.649
00:28:21	214.963	32.9238	57.9167	36.698	40.679
00:33:21	215.448	32.9895	58	36.698	40.679
00:38:21	215.351	32.9777	58.0833	36.698	40.708
00:43:21	215.136	32.9472	58.1667	36.698	40.708
00:48:21	215.05	32.9355	58.25	36.726	40.708
00:53:21	214.985	32.9308	58.3333	36.698	40.708
00:58:21	214.608	32.8745	58.4167	36.726	40.679
01:03:21	214.791	32.9003	58.5	36.726	40.708
01:08:21	215.071	32.9449	58.5833	36.698	40.679
01:13:21	215.05	32.9355	58.6667	36.698	40.679
01:18:21	214.888	32.9191	58.75	36.698	40.708
01:23:21	214.769	32.9027	58.8333	36.726	40.679
01:28:21	214.694	32.8862	58.9167	36.726	40.679
01:33:21	214.651	32.8792	59	36.698	40.679
01:38:21	214.953	32.9238	59.0833	36.698	40.708
01:43:21	214.899	32.9191	59.1667	36.698	40.708
01:48:21	214.748	32.8909	59.25	36.726	40.679
01:53:21	214.414	32.844	59.3333	36.726	40.679
01:58:21	214.328	32.8323	59.4167	36.698	40.679
02:03:21	214.295	32.8299	59.5	36.698	40.679
02:08:21	214.5	32.8581	59.5833	36.698	40.649
02:13:21	215.007	32.9332	59.6667	36.698	40.679
02:18:21	215.664	33.034	59.75	36.698	40.708
02:23:21	215.912	33.0622	59.8333	36.726	40.738
02:28:21	215.987	33.0739	59.9167	36.726	40.738
02:33:21	215.793	33.0481	60	36.754	40.767
02:38:21	215.923	33.0622	60.0833	36.754	40.767
02:43:21	215.955	33.0622	60.1667	36.782	40.797
02:48:21	215.395	32.9848	60.25	36.782	40.767
02:53:21	215.093	32.9449	60.3333	36.782	40.767
02:58:21	214.748	32.8909	60.4167	36.782	40.767
03:03:21	214.338	32.837	60.5	36.782	40.738
03:08:21	214.586	32.8768	60.5833	36.754	40.738
03:13:21	214.532	32.8698	60.6667	36.754	40.738
03:18:21	214.392	32.837	60.75	36.754	40.708
03:23:21	214.349	32.8346	60.8333	36.754	40.708
03:28:21	214.22	32.8229	60.9167	36.754	40.708
03:33:21	213.864	32.7689	61	36.754	40.708
03:38:21	213.767	32.7525	61.0833	36.726	40.679
03:43:21	213.875	32.7713	61.1667	36.726	40.679
03:48:21	213.746	32.7525	61.25	36.726	40.679
03:53:21	214.425	32.8487	61.3333	36.698	40.679
03:58:21	214.942	32.9214	61.4167	36.698	40.679
04:03:21	214.813	32.8956	61.5	36.726	40.679
04:08:21	214.576	32.8745	61.5833	36.726	40.679
04:13:21	214.414	32.844	61.6667	36.726	40.679
04:18:21	214.263	32.8252	61.75	36.726	40.679
04:23:21	213.832	32.7689	61.8333	36.726	40.679
04:28:21	213.724	32.7478	61.9167	36.726	40.649
04:33:21	213.379	32.6962	62	36.726	40.649
04:38:21	213.767	32.7619	62.0833	36.698	40.649
04:43:21	213.272	32.6751	62.1667	36.698	40.619
04:48:21	212.862	32.6211	62.25	36.698	40.619
04:53:21	213.336	32.6845	62.3333	36.698	40.619
04:58:21	213.369	32.6985	62.4167	36.67	40.619
05:03:21	213.185	32.6704	62.5	36.67	40.59
05:08:21	212.884	32.6235	62.5833	36.67	40.59
05:13:21	212.625	32.6	62.6667	36.67	40.56
05:18:21	212.571	32.5742	62.75	36.643	40.56
05:23:21	213.035	32.6516	62.8333	36.643	40.56
05:28:21	215.093	32.9378	62.9167	36.643	40.619
05:33:21	215.438	32.9871	63	36.67	40.649
05:38:21	215.125	32.9425	63.0833	36.698	40.679
05:43:21	214.532	32.8651	63.1667	36.698	40.679
05:48:21	214.349	32.8393	63.25	36.726	40.679
05:53:21	214.532	32.8534	63.3333	36.726	40.679
05:58:21	214.726	32.8933	63.4167	36.726	40.708
06:03:21	214.565	32.8698	63.5	36.754	40.708
06:08:21	214.425	32.851	63.5833	36.754	40.708
06:13:21	214.144	32.8065	63.6667	36.754	40.708
06:18:21	214.08	32.7947	63.75	36.754	40.708
06:23:21	213.961	32.776	63.8333	36.754	40.708
06:28:21	213.498	32.7197	63.9167	36.754	40.679
06:33:21	213.304	32.6915	64	36.754	40.649
06:38:21	213.401	32.6962	64.0833	36.726	40.679
06:43:21	213.433	32.7056	64.1667	36.726	40.649
06:48:21	213.304	32.6892	64.25	36.726	40.649
06:53:21	213.487	32.7126	64.3333	36.726	40.649
06:58:21	213.088	32.6516	64.4167	36.726	40.649
07:03:21	213.142	32.668	64.5	36.726	40.649
07:08:21	213.207	32.6727	64.5833	36.698	40.649
07:13:21	213.444	32.6985	64.6667	36.698	40.619
07:18:21	213.369	32.6962	64.75	36.726	40.649
07:23:21	213.606	32.7173	64.8333	36.698	40.649
07:28:21	213.466	32.7032	64.9167	36.726	40.649
07:33:21	213.25	32.6657	65	36.726	40.649
07:38:21	212.744	32.5977	65.0833	36.726	40.619
07:43:21	212.614	32.5789	65.1667	36.698	40.619
07:48:21	213.045	32.654	65.25	36.698	40.619
07:53:21	212.668	32.6	65.3333	36.698	40.619
07:58:21	212.647	32.5906	65.4167	36.698	40.619
08:03:21	212.765	32.6023	65.5	36.698	40.619
08:08:21	213.013	32.6399	65.5833	36.698	40.619
08:13:21	213.045	32.6375	65.6667	36.698	40.619
08:18:21	213.078	32.6469	65.75	36.698	40.619
08:23:21	213.207	32.6704	65.8333	36.698	40.619
08:28:21	213.336	32.6845	65.9167	36.698	40.649
08:33:21	213.067	32.6469	66	36.698	40.619
08:38:21	213.099	32.654	66.0833	36.698	40.619
08:43:21	212.916	32.6235	66.1667	36.698	40.619
08:48:21	212.679	32.5906	66.25	36.698	40.619
08:53:21	212.959	32.6282	66.3333	36.698	40.619
08:58:21	212.657	32.5906	66.4167	36.698	40.619
09:03:21	212.841	32.6117	66.5	36.698	40.619
09:08:21	212.948	32.6305	66.5833	36.698	40.619
09:13:21	213.239	32.6821	66.6667	36.698	40.619
09:18:21	213.067	32.6422	66.75	36.698	40.619
09:23:21	213.304	32.6845	66.8333	36.698	40.649
09:28:21	213.228	32.6633	66.9167	36.698	40.619
09:33:21	213.304	32.6774	67	36.726	40.649
09:38:21	213.401	32.6938	67.0833	36.726	40.649
09:43:21	213.444	32.6985	67.1667	36.726	40.679
09:48:21	213.024	32.6446	67.25	36.726	40.679
09:53:21	213.358	32.6892	67.3333	36.726	40.679
09:58:21	213.498	32.7126	67.4167	36.726	40.679
10:03:21	213.983	32.7642	67.5	36.726	40.708
10:08:21	214.058	32.7853	67.5833	36.754	40.708
10:13:21	213.724	32.7502	67.6667	36.754	40.708
10:18:21	213.81	32.7478	67.75	36.782	40.738
10:23:21	214.241	32.8112	67.8333	36.782	40.738
10:28:21	213.767	32.7384	67.9167	36.782	40.738
10:33:21	213.897	32.7689	68	36.782	40.767
10:38:21	213.832	32.7548	68.0833	36.809	40.767
10:43:21	214.209	32.8158	68.1667	36.809	40.767
10:48:21	214.608	32.8651	68.25	36.809	40.797
10:53:21	214.101	32.7971	68.3333	36.809	40.797
10:58:21	214.285	32.8135	68.4167	36.837	40.797
11:03:21	214.5	32.8463	68.5	36.837	40.827
11:08:21	214.673	32.8745	68.5833	36.837	40.827
11:13:21	214.123	32.79	68.6667	36.837	40.827
11:18:21	214.328	32.8299	68.75	36.865	40.827
11:23:21	214.608	32.8698	68.8333	36.865	40.856
11:28:21	214.813	32.8886	68.9167	36.865	40.856
11:33:21	214.543	32.8651	69	36.865	40.886
11:38:21	214.651	32.8604	69.0833	36.893	40.886
11:43:21	214.188	32.8205	69.1667	36.893	40.886
11:48:21	214.597	32.8604	69.25	36.893	40.886
11:53:21	214.306	32.837	69.3333	36.893	40.886
11:58:21	214.317	32.8229	69.4167	36.921	40.886
12:03:21	214.069	32.79	69.5	36.921	40.886
12:08:21	214.446	32.851	69.5833	36.921	40.916
12:13:21	214.629	32.8722	69.6667	36.921	40.916
12:18:21	214.942	32.9097	69.75	36.921	40.916
12:23:21	214.285	32.8299	69.8333	36.921	40.916
12:28:21	214.468	32.8393	69.9167	36.949	40.916
12:33:21	214.662	32.8768	70	36.949	40.945
12:38:21	214.597	32.8745	70.0833	36.949	40.945
12:43:21	214.737	32.8792	70.1667	36.949	40.945
12:48:21	214.823	32.898	70.25	36.949	40.945
12:53:21	214.877	32.9003	70.3333	36.949	40.945
12:58:21	214.457	32.8487	70.4167	36.949	40.945
13:03:21	214.392	32.8393	70.5	36.976	40.945
13:08:21	214.489	32.844	70.5833	36.976	40.945
13:13:21	214.64	32.8722	70.6667	36.976	40.945
13:18:21	214.769	32.898	70.75	36.976	40.975
13:23:21	214.694	32.8768	70.8333	36.976	40.975
13:28:21	214.823	32.8933	70.9167	36.976	40.975
13:33:21	214.522	32.8487	71	36.976	40.975
13:38:21	214.716	32.8815	71.0833	37.004	41.005
13:43:21	215.125	32.9449	71.1667	37.004	41.005
13:48:21	215.287	32.9683	71.25	37.004	41.005
13:53:21	214.888	32.9167	71.3333	37.004	41.035
13:58:21	214.532	32.8698	71.4167	37.032	41.035
14:03:21	214.64	32.8792	71.5	37.032	41.035
14:08:21	214.554	32.8581	71.5833	37.032	41.035
14:13:21	214.856	32.9027	71.6667	37.032	41.035
14:18:21	214.662	32.8768	71.75	37.032	41.035
14:23:21	215.028	32.9308	71.8333	37.032	41.035
14:28:21	215.179	32.9566	71.9167	37.032	41.064
14:33:21	215.211	32.9543	72	37.06	41.064
14:38:21	215.179	32.9496	72.0833	37.06	41.064
14:43:21	215.276	32.9566	72.1667	37.06	41.064
14:48:21	215.287	32.9566	72.25	37.088	41.094
14:53:21	214.586	32.8581	72.3333	37.088	41.064
14:58:21	215.427	32.9824	72.4167	37.088	41.094
15:03:21	215.395	32.9824	72.5	37.06	41.094
15:08:21	215.017	32.9261	72.5833	37.088	41.094
15:13:21	214.435	32.837	72.6667	37.088	41.094
15:18:21	214.716	32.8839	72.75	37.088	41.094
15:23:21	215.06	32.9285	72.8333	37.088	41.094
15:28:21	215.287	32.9637	72.9167	37.088	41.124
15:33:21	215.75	33.034	73	37.088	41.124
15:38:21	215.966	33.0645	73.0833	37.116	41.154
15:43:21	215.632	33.0153	73.1667	37.116	41.154
15:48:21	215.524	32.9918	73.25	37.116	41.154
15:53:21	215.405	32.9871	73.3333	37.144	41.154
15:58:21	216.106	33.0763	73.4167	37.144	41.184
16:03:21	215.804	33.0481	73.5	37.144	41.184
16:08:21	215.869	33.0411	73.5833	37.172	41.214
16:13:21	215.718	33.0223	73.6667	37.172	41.214
16:18:21	215.955	33.0528	73.75	37.172	41.214
16:23:21	215.513	32.9965	73.8333	37.172	41.214
16:28:21	215.017	32.9214	73.9167	37.2	41.214
16:33:21	215.093	32.9378	74	37.172	41.214
16:38:21	214.888	32.9027	74.0833	37.172	41.184
16:43:21	214.36	32.8323	74.1667	37.172	41.184
16:48:21	214.479	32.844	74.25	37.172	41.154
16:53:21	214.425	32.8346	74.3333	37.172	41.154
16:58:21	214.403	32.8346	74.4167	37.172	41.154
17:03:21	214.177	32.7994	74.5	37.144	41.124
17:08:21	214.209	32.8041	74.5833	37.144	41.124
17:13:21	215.664	33.0106	74.6667	37.144	41.154
17:18:21	215.707	33.0223	74.75	37.144	41.184
17:23:21	215.685	33.0153	74.8333	37.144	41.184
17:28:21	215.545	33.0082	74.9167	37.172	41.214
17:33:21	215.47	32.9942	75	37.2	41.214
17:38:21	215.782	33.034	75.0833	37.2	41.243
17:43:21	215.912	33.0481	75.1667	37.2	41.243
17:48:21	215.75	33.027	75.25	37.2	41.243
17:53:21	215.621	33.0129	75.3333	37.228	41.243
17:58:21	215.944	33.0528	75.4167	37.228	41.273
18:03:21	215.987	33.0622	75.5	37.228	41.273
18:08:21	216.601	33.149	75.5833	37.228	41.303
18:13:21	216.968	33.2053	75.6667	37.256	41.303
18:18:21	216.903	33.1936	75.75	37.284	41.333
18:23:21	216.698	33.1631	75.8333	37.312	41.363
18:28:21	217.173	33.2358	75.9167	37.312	41.393
18:33:21	216.957	33.2006	76	37.312	41.393
18:38:21	217.356	33.2593	76.0833	37.34	41.423
18:43:21	215.987	33.0575	76.1667	37.34	41.393
18:48:21	215.168	32.9472	76.25	37.368	41.363
18:53:21	214.683	32.8815	76.3333	37.34	41.333
18:58:21	214.446	32.8346	76.4167	37.34	41.333
19:03:21	214.791	32.8886	76.5	37.312	41.303
19:08:21	214.845	32.905	76.5833	37.284	41.303
19:13:21	215.007	32.9214	76.6667	37.284	41.303
19:18:21	214.845	32.8933	76.75	37.284	41.273
19:23:21	214.716	32.8792	76.8333	37.284	41.273
19:28:21	214.802	32.8886	76.9167	37.256	41.273
19:33:21	215.125	32.9425	77	37.256	41.273
19:38:21	215.136	32.9425	77.0833	37.256	41.273
19:43:21	215.114	32.9332	77.1667	37.256	41.273
19:48:21	215.384	32.9777	77.25	37.284	41.273
19:53:21	215.653	33.0129	77.3333	37.284	41.303
19:58:21	215.664	33.0176	77.4167	37.284	41.303
20:03:21	215.89	33.0481	77.5	37.284	41.303
20:08:21	215.998	33.0552	77.5833	37.284	41.333
20:13:21	215.869	33.0458	77.6667	37.312	41.333
20:18:21	216.149	33.0833	77.75	37.312	41.363
20:23:21	216.17	33.0857	77.8333	37.312	41.363
20:28:21	216.03	33.0669	77.9167	37.34	41.363
20:33:21	216.235	33.1021	78	37.34	41.393
20:38:21	216.451	33.1326	78.0833	37.34	41.393
20:43:21	216.504	33.1349	78.1667	37.368	41.393
20:48:21	216.882	33.1912	78.25	37.368	41.423
20:53:21	217.183	33.2335	78.3333	37.368	41.453
20:58:21	217.022	33.2123	78.4167	37.396	41.453
21:03:21	217.086	33.2147	78.5	37.396	41.483
21:08:21	217.205	33.2382	78.5833	37.424	41.513
21:13:21	217.108	33.2241	78.6667	37.424	41.513
21:18:21	217.367	33.2569	78.75	37.452	41.543
21:23:21	217.625	33.2945	78.8333	37.452	41.543
21:28:21	215.093	32.9355	78.9167	37.48	41.483
21:33:21	215.201	32.9519	79	37.452	41.483
21:38:21	215.147	32.9425	79.0833	37.424	41.423
21:43:21	215.168	32.9449	79.1667	37.424	41.423
21:48:21	214.931	32.9027	79.25	37.424	41.393
21:53:21	214.91	32.9073	79.3333	37.396	41.393
21:58:21	214.888	32.9027	79.4167	37.396	41.393
22:03:21	215.19	32.9449	79.5	37.368	41.393
22:08:21	215.244	32.9519	79.5833	37.368	41.393
22:13:21	215.233	32.9543	79.6667	37.368	41.393
22:18:21	215.438	32.9848	79.75	37.368	41.393
22:23:21	215.47	32.9848	79.8333	37.368	41.393
22:28:21	215.502	32.9965	79.9167	37.368	41.393
22:33:21	215.254	32.959	80	37.368	41.393
22:38:21	215.287	32.9637	80.0833	37.368	41.393
22:43:21	215.588	33.0035	80.1667	37.368	41.393
22:48:21	215.556	33.0012	80.25	37.368	41.393
22:53:21	215.33	32.9683	80.3333	37.396	41.393
22:58:21	215.319	32.966	80.4167	37.396	41.393
23:03:21	215.481	32.9871	80.5	37.396	41.393
23:08:21	215.427	32.9824	80.5833	37.396	41.393
23:13:21	215.804	33.0317	80.6667	37.396	41.423
23:18:21	215.642	33.0106	80.75	37.396	41.423
23:23:21	215.287	32.959	80.8333	37.396	41.393
23:28:21	215.481	32.9895	80.9167	37.396	41.393
23:33:21	215.351	32.9637	81	37.396	41.393
23:38:21	215.491	32.9918	81.0833	37.396	41.393
23:43:21	215.632	33.0059	81.1667	37.396	41.393
23:48:21	215.675	33.02	81.25	37.396	41.423
23:53:21	215.588	33.0035	81.3333	37.396	41.423
23:58:21	215.61	33.0106	81.4167	37.396	41.423
00:03:21	215.502	32.9895	81.5	37.396	41.423
00:08:21	215.567	33.0035	81.5833	37.396	41.423
00:13:21	215.588	33.0035	81.6667	37.396	41.423
00:18:21	215.567	32.9988	81.75	37.396	41.423
00:23:21	215.405	32.973	81.8333	37.396	41.423
00:28:21	215.556	32.9988	81.9167	37.396	41.423
00:33:21	215.556	32.9988	82	37.424	41.423
00:38:21	215.05	32.9238	82.0833	37.424	41.423
00:43:21	215.502	32.9895	82.1667	37.424	41.423
00:48:21	215.405	32.9801	82.25	37.424	41.423
00:53:21	215.362	32.9707	82.3333	37.424	41.423
00:58:21	215.351	32.966	82.4167	37.424	41.423
01:03:21	215.287	32.9566	82.5	37.424	41.423
01:08:21	215.61	33.0106	82.5833	37.424	41.423
01:13:21	215.47	32.9871	82.6667	37.424	41.423
01:18:21	215.47	32.9848	82.75	37.424	41.423
01:23:21	215.707	33.0176	82.8333	37.424	41.423
01:28:21	215.75	33.0247	82.9167	37.424	41.453
01:33:21	215.416	32.9754	83	37.424	41.453
01:38:21	215.362	32.973	83.0833	37.452	41.453
01:43:21	215.33	32.966	83.1667	37.424	41.453
01:48:21	215.341	32.9683	83.25	37.424	41.453
01:53:21	215.33	32.9637	83.3333	37.424	41.453
01:58:21	215.319	32.9637	83.4167	37.424	41.453
02:03:21	215.233	32.9566	83.5	37.424	41.423
02:08:21	215.448	32.9801	83.5833	37.424	41.453
02:13:21	215.308	32.9637	83.6667	37.424	41.423
02:18:21	215.491	32.9942	83.75	37.424	41.453
02:23:21	216.688	33.1631	83.8333	37.452	41.483
02:28:21	216.591	33.1443	83.9167	37.452	41.513
02:33:21	216.731	33.1701	84	37.48	41.543
02:38:21	217.108	33.2217	84.0833	37.48	41.543
02:43:21	217.183	33.2311	84.1667	37.508	41.573
02:48:21	217.226	33.2405	84.25	37.536	41.603
02:53:21	216.677	33.1537	84.3333	37.536	41.603
02:58:21	216.526	33.1349	84.4167	37.536	41.603
03:03:21	217.043	33.2123	84.5	37.565	41.603
03:08:21	216.72	33.1701	84.5833	37.565	41.603
03:13:21	216.569	33.1443	84.6667	37.565	41.603
03:18:21	216.688	33.1584	84.75	37.565	41.633
03:23:21	216.925	33.1936	84.8333	37.565	41.633
03:28:21	216.472	33.1232	84.9167	37.593	41.633
03:33:21	215.61	33.0035	85	37.593	41.603
03:38:21	215.33	32.9683	85.0833	37.593	41.603
03:43:21	214.996	32.9238	85.1667	37.565	41.573
03:48:21	215.071	32.9261	85.25	37.536	41.543
03:53:21	214.888	32.898	85.3333	37.536	41.543
03:58:21	214.877	32.9003	85.4167	37.536	41.513
04:03:21	215.028	32.9261	85.5	37.508	41.513
04:08:21	215.491	32.9895	85.5833	37.508	41.543
04:13:21	215.233	32.9472	85.6667	37.508	41.513
04:18:21	215.114	32.9332	85.75	37.508	41.513
04:23:21	214.985	32.9214	85.8333	37.508	41.483
04:28:21	214.694	32.8745	85.9167	37.508	41.483
04:33:21	214.802	32.8815	86	37.508	41.483
04:38:21	214.78	32.8792	86.0833	37.48	41.483
04:43:21	214.716	32.8768	86.1667	37.48	41.483
04:48:21	214.543	32.8534	86.25	37.48	41.513
04:53:21	214.565	32.8487	86.3333	37.48	41.543
04:58:21	214.543	32.8557	86.4167	37.48	41.543
05:03:21	214.446	32.8487	86.5	37.48	41.573
05:08:21	214.252	32.8112	86.5833	37.452	41.543
05:13:21	214.026	32.776	86.6667	37.452	41.543
05:18:21	214.177	32.7947	86.75	37.452	41.543
05:23:21	214.037	32.7807	86.8333	37.452	41.513
05:28:21	213.95	32.7642	86.9167	37.424	41.513
05:33:21	213.757	32.7314	87	37.424	41.513
05:38:21	213.757	32.7314	87.0833	37.424	41.483
05:43:21	213.164	32.6493	87.1667	37.424	41.453
05:48:21	213.218	32.668	87.25	37.396	41.453
05:53:21	213.509	32.6985	87.3333	37.396	41.453
05:58:21	213.379	32.6282	87.4167	37.368	41.453
06:03:21	212.808	32.607	87.5	37.368	41.423
06:08:21	214.931	32.9097	87.5833	37.368	41.483
06:13:21	215.136	32.9308	87.6667	37.368	41.483
06:18:21	215.071	32.9308	87.75	37.396	41.513
06:23:21	214.963	32.9073	87.8333	37.396	41.513
06:28:21	214.5	32.8417	87.9167	37.424	41.513
06:33:21	214.726	32.8722	88	37.424	41.543
06:38:21	214.435	32.8346	88.0833	37.424	41.513
06:43:21	214.285	32.8182	88.1667	37.424	41.513
06:48:21	213.95	32.7619	88.25	37.424	41.513
06:53:21	213.918	32.7595	88.3333	37.424	41.513
06:58:21	214.091	32.7783	88.4167	37.424	41.513
07:03:21	213.983	32.7666	88.5	37.396	41.483
07:08:21	213.929	32.7642	88.5833	37.396	41.483
07:13:21	213.8	32.7408	88.6667	37.396	41.483
07:18:21	213.875	32.7572	88.75	37.396	41.483
07:23:21	213.584	32.7079	88.8333	37.396	41.483
07:28:21	213.315	32.6751	88.9167	37.396	41.453
07:33:21	213.39	32.6962	89	37.396	41.453
07:38:21	213.379	32.6774	89.0833	37.368	41.453
07:43:21	213.228	32.668	89.1667	37.368	41.453
07:48:21	212.862	32.6094	89.25	37.368	41.423
07:53:21	212.7	32.5836	89.3333	37.368	41.393
07:58:21	212.55	32.5648	89.4167	37.34	41.393
08:03:21	212.7	32.5906	89.5	37.34	41.393
08:08:21	212.7	32.5883	89.5833	37.34	41.363
08:13:21	212.679	32.5859	89.6667	37.312	41.363
08:18:21	212.797	32.5977	89.75	37.312	41.363
08:23:21	212.808	32.593	89.8333	37.312	41.363
08:28:21	212.765	32.593	89.9167	37.312	41.363
08:33:21	212.841	32.6023	90	37.312	41.363
08:38:21	212.776	32.6164	90.0833	37.312	41.333
08:43:21	215.244	32.9566	90.1667	37.284	41.423
08:48:21	215.244	32.959	90.25	37.312	41.453
08:53:21	215.168	32.9425	90.3333	37.34	41.483
08:58:21	215.222	32.9496	90.4167	37.368	41.483
09:03:21	215.136	32.9332	90.5	37.396	41.513
09:08:21	215.233	32.9519	90.5833	37.396	41.543
09:13:21	215.448	32.9895	90.6667	37.424	41.573
09:18:21	215.06	32.9332	90.75	37.452	41.573
09:23:21	215.071	32.9261	90.8333	37.452	41.573
09:28:21	215.157	32.9378	90.9167	37.452	41.603
09:33:21	214.92	32.8956	91	37.48	41.573
09:38:21	214.888	32.8933	91.0833	37.48	41.573
09:43:21	215.341	32.9637	91.1667	37.48	41.603
09:48:21	215.298	32.9496	91.25	37.48	41.633
09:53:21	215.772	33.0223	91.3333	37.508	41.633
09:58:21	215.481	32.9918	91.4167	37.508	41.633
10:03:21	215.147	32.9402	91.5	37.508	41.633
10:08:21	215.125	32.9238	91.5833	37.508	41.633
10:13:21	215.448	32.9801	91.6667	37.508	41.663
10:18:21	215.642	32.9988	91.75	37.536	41.663
10:23:21	216.073	33.0622	91.8333	37.536	41.693
10:28:21	216.17	33.0716	91.9167	37.536	41.693
10:33:21	216.02	33.0622	92	37.565	41.723
10:38:21	215.89	33.0458	92.0833	37.565	41.723
10:43:21	216.257	33.0927	92.1667	37.593	41.754
10:48:21	215.923	33.0598	92.25	37.593	41.754
10:53:21	216.203	33.088	92.3333	37.593	41.754
10:58:21	216.451	33.1208	92.4167	37.621	41.784
11:03:21	216.472	33.1208	92.5	37.621	41.784
11:08:21	216.494	33.1279	92.5833	37.621	41.814
11:13:21	216.925	33.1865	92.6667	37.649	41.814
11:18:21	216.634	33.149	92.75	37.649	41.844
11:23:21	217.022	33.2006	92.8333	37.677	41.874
11:28:21	216.871	33.1772	92.9167	37.677	41.874
11:33:21	216.591	33.1467	93	37.677	41.874
11:38:21	216.343	33.1185	93.0833	37.705	41.874
11:43:21	216.774	33.1678	93.1667	37.705	41.904
11:48:21	216.914	33.1818	93.25	37.705	41.904
11:53:21	217.054	33.2077	93.3333	37.705	41.935
11:58:21	216.957	33.1936	93.4167	37.734	41.935
12:03:21	217.022	33.2053	93.5	37.734	41.935
12:08:21	216.688	33.1631	93.5833	37.734	41.906
12:13:21	216.591	33.1443	93.6667	37.734	41.906
12:18:21	216.731	33.1701	93.75	37.707	41.877
12:23:21	217.108	33.2217	93.8333	37.707	41.877
12:28:21	217.183	33.2311	93.9167	37.679	41.877
12:33:21	217.226	33.2405	94	37.707	41.877
12:38:21	216.677	33.1537	94.0833	37.679	41.877
12:43:21	216.526	33.1349	94.1667	37.679	41.847
12:48:21	217.043	33.2123	94.25	37.679	41.847
12:53:21	216.72	33.1701	94.3333	37.679	41.818
12:58:21	216.569	33.1443	94.4167	37.651	41.847
13:03:21	216.688	33.1584	94.5	37.651	41.818
13:08:21	216.925	33.1936	94.5833	37.651	41.818
13:13:21	216.472	33.1232	94.6667	37.651	41.788
13:18:21	215.61	33.0035	94.75	37.651	41.788
13:23:21	215.33	32.9683	94.8333	37.624	41.847
13:28:21	214.996	32.9238	94.9167	37.651	41.906
13:33:21	215.071	32.9261	95	37.679	41.935
13:38:21	214.888	32.898	95.0833	37.707	41.935
13:43:21	214.877	32.9003	95.1667	37.734	41.965
13:48:21	215.028	32.9261	95.25	37.734	41.965
13:53:21	215.491	32.9895	95.3333	37.734	41.965
13:58:21	215.233	32.9472	95.4167	37.734	41.965
14:03:21	215.114	32.9332	95.5	37.762	41.965
14:08:21	214.985	32.9214	95.5833	37.762	41.965
14:13:21	214.694	32.8745	95.6667	37.734	41.965
14:18:21	214.802	32.8815	95.75	37.762	41.965
14:23:21	214.78	32.8792	95.8333	37.734	41.935
14:28:21	214.716	32.8768	95.9167	37.734	41.906
14:33:21	214.543	32.8534	96	37.734	41.906
14:38:21	235.772	0	96.0833	37.734	37.762
14:43:21	235.934	0	96.1667	36.532	36.587
14:48:21	235.977	0	96.25	35.079	35.133
14:53:21	236.128	0	96.3333	33.975	34.029
14:58:21	236.02	0	96.4167	33.072	33.124
15:03:21	236.139	0	96.5	32.283	32.309
15:08:21	236.031	0	96.5833	31.605	31.631
15:13:21	236.43	0	96.6667	31.01	31.036
15:18:21	236.236	0	96.75	30.496	30.521
15:23:21	235.848	0	96.8333	30.01	30.035
15:28:21	235.762	0	96.9167	29.603	29.628
15:33:21	235.858	0	97	29.222	29.248
15:38:21	236.419	0	97.0833	28.869	28.894
15:43:21	236.096	0	97.1667	28.566	28.591
15:48:21	235.826	0	97.25	28.265	28.29
15:53:21	235.643	0	97.3333	28.015	28.04
15:58:21	236.02	0	97.4167	27.765	27.79
16:03:21	236.063	0	97.5	27.54	27.54
16:08:21	236.096	0	97.5833	27.316	27.341
16:13:21	235.966	0	97.6667	27.093	27.117
16:18:21	235.621	0	97.75	26.919	26.944
16:23:21	235.169	0	97.8333	26.721	26.745
16:28:21	235.33	0	97.9167	26.572	26.572
16:33:21	235.524	0	98	26.399	26.424
16:38:21	236.009	0	98.0833	26.251	26.276
16:43:21	235.902	0	98.1667	26.104	26.128
16:48:21	235.826	0	98.25	25.956	25.981
16:53:21	236.009	0	98.3333	25.833	25.833
16:58:21	236.052	0	98.4167	25.71	25.71
17:03:21	235.988	0	98.5	25.587	25.587
17:08:21	235.923	0	98.5833	25.465	25.465
17:13:21	236.063	0	98.6667	25.342	25.367
17:18:21	235.772	0	98.75	25.244	25.244
17:23:21	235.298	0	98.8333	25.122	25.146
17:28:21	235.535	0	98.9167	25.024	25.049
17:33:21	235.427	0	99	24.926	24.951
17:38:21	235.815	0	99.0833	24.829	24.853
17:43:21	235.708	0	99.1667	24.731	24.756
17:48:21	235.729	0	99.25	24.658	24.682
17:53:21	235.815	0	99.3333	24.561	24.585
17:58:21	235.912	0	99.4167	24.487	24.512
18:03:21	236.063	0	99.5	24.414	24.414
18:08:21	235.805	0	99.5833	24.317	24.341
18:13:21	235.869	0	99.6667	24.244	24.268
18:18:21	235.708	0	99.75	24.171	24.195
18:23:21	235.675	0	99.8333	24.098	24.123
18:28:21	235.751	0	99.9167	24.025	24.05
18:33:21	235.406	0	100	23.977	23.977
18:38:21	235.815	0	100.083	23.904	23.904
18:43:21	236.009	0	100.167	23.831	23.855
18:48:21	235.697	0	100.25	23.758	23.783
18:53:21	235.675	0	100.333	23.71	23.71
18:58:21	235.557	0	100.417	23.637	23.662
19:03:21	235.762	0	100.5	23.589	23.613
19:08:21	235.589	0	100.583	23.54	23.54
19:13:21	235.524	0	100.667	23.468	23.492
19:18:21	235.815	0	100.75	23.419	23.419
19:23:21	235.287	0	100.833	23.371	23.371
19:28:21	235.136	0	100.917	23.298	23.323
19:33:21	234.565	0	101	23.25	23.274
19:38:21	232.378	0	101.083	23.202	23.202
19:43:21	232.701	0	101.167	23.153	23.153
19:48:21	232.723	0	101.25	23.105	23.105
19:53:21	232.636	0	101.333	23.057	23.057
19:58:21	232.475	0	101.417	23.008	23.008
20:03:21	232.561	0	101.5	22.96	22.96
20:08:21	232.313	0	101.583	22.912	22.912
20:13:21	232.615	0	101.667	22.863	22.888
20:18:21	232.345	0	101.75	22.815	22.839
20:23:21	232.518	0	101.833	22.791	22.791
20:28:21	232.583	0	101.917	22.719	22.743
20:33:21	232.873	0	102	22.695	22.719
20:38:21	232.798	0	102.083	22.646	22.671
20:43:21	233.111	0	102.167	22.598	22.622
20:48:21	233.229	0	102.25	22.574	22.574
20:53:21	232.97	0	102.333	22.526	22.526
20:58:21	233.305	0	102.417	22.478	22.502
21:03:21	233.649	0	102.5	22.454	22.454
21:08:21	233.811	0	102.583	22.405	22.43
21:13:21	233.746	0	102.667	22.381	22.405
21:18:21	233.714	0	102.75	22.333	22.357
21:23:21	233.477	0	102.833	22.309	22.309
21:28:21	233.509	0	102.917	22.261	22.261
21:33:21	233.466	0	103	22.237	22.237
21:38:21	233.078	0	103.083	22.189	22.213
21:43:21	233.628	0	103.167	22.165	22.165
21:48:21	233.66	0	103.25	22.141	22.141
21:53:21	234.048	0	103.333	22.093	22.117
21:58:21	234.307	0	103.417	22.069	22.069
22:03:21	234.414	0	103.5	22.021	22.045
22:08:21	234.652	0	103.583	21.997	22.021
22:13:21	234.91	0	103.667	21.972	21.972
22:18:21	235.05	0	103.75	21.924	21.948
22:23:21	235.233	0	103.833	21.9	21.924
22:28:21	236.052	0	103.917	21.876	21.9
22:33:21	236.182	0	104	21.852	21.852
22:38:21	236.246	0	104.083	21.828	21.828
22:43:21	235.891	0	104.167	21.78	21.804
22:48:21	236.182	0	104.25	21.756	21.78
22:53:21	236.063	0	104.333	21.732	21.732
22:58:21	236.117	0	104.417	21.708	21.708
23:03:21	236.516	0	104.5	21.684	21.684
23:08:21	234.921	0	104.583	21.636	21.66
23:13:21	234.404	0	104.667	21.636	21.636
23:18:21	233.994	0	104.75	21.588	21.612
23:23:21	234.156	0	104.833	21.564	21.588
23:28:21	234.124	0	104.917	21.54	21.564
23:33:21	234.102	0	105	21.516	21.516
23:38:21	233.93	0	105.083	21.492	21.516
23:43:21	234.177	0	105.167	21.468	21.468
23:48:21	234.522	0	105.25	21.444	21.444
23:53:21	234.598	0	105.333	21.42	21.42
23:58:21	234.792	0	105.417	21.396	21.396
00:03:21	234.867	0	105.5	21.372	21.372
00:08:21	235.201	0	105.583	21.348	21.348
00:13:21	235.072	0	105.667	21.324	21.324
00:18:21	234.695	0	105.75	21.3	21.3
00:23:21	234.846	0	105.833	21.276	21.276
00:28:21	234.49	0	105.917	21.253	21.253
00:33:21	234.889	0	106	21.229	21.229
00:38:21	234.943	0	106.083	21.205	21.229
00:43:21	235.266	0	106.167	21.181	21.181
00:48:21	235.201	0	106.25	21.157	21.181
00:53:21	235.169	0	106.333	21.133	21.133
00:58:21	235.578	0	106.417	21.109	21.133
01:03:21	235.751	0	106.5	21.085	21.109
01:08:21	235.654	0	106.583	21.061	21.085
01:13:21	235.578	0	106.667	21.061	21.061
01:18:21	235.46	0	106.75	21.037	21.037
01:23:21	235.233	0	106.833	21.013	21.013
01:28:21	235.578	0	106.917	20.989	21.013
01:33:21	235.762	0	107	20.965	20.965
01:38:21	235.686	0	107.083	20.941	20.965
01:43:21	235.524	0	107.167	20.917	20.941
01:48:21	235.621	0	107.25	20.917	20.917
01:53:21	235.503	0	107.333	20.893	20.893
01:58:21	235.266	0	107.417	20.869	20.869
02:03:21	235.492	0	107.5	20.845	20.869
02:08:21	235.492	0	107.583	20.821	20.845
02:13:21	235.363	0	107.667	20.798	20.821
02:18:21	235.708	0	107.75	20.798	20.798
02:23:21	236.074	0	107.833	20.774	20.798
02:28:21	236.214	0	107.917	20.75	20.774
02:33:21	235.805	0	108	20.726	20.75
02:38:21	235.891	0	108.083	20.726	20.726
02:43:21	235.891	0	108.167	20.702	20.702
02:48:21	235.708	0	108.25	20.678	20.702
02:53:21	235.578	0	108.333	20.654	20.678
02:58:21	235.6	0	108.417	20.654	20.654
03:03:21	235.783	0	108.5	20.63	20.654
03:08:21	235.826	0	108.583	20.606	20.63
03:13:21	235.966	0	108.667	20.606	20.606
03:18:21	235.589	0	108.75	20.582	20.606
03:23:21	235.643	0	108.833	20.558	20.582
03:28:21	235.481	0	108.917	20.534	20.558
03:33:21	235.449	0	109	20.534	20.534
03:38:21	235.32	0	109.083	20.511	20.534
03:43:21	235.481	0	109.167	20.487	20.511
03:48:21	235.212	0	109.25	20.487	20.487
03:53:21	235.158	0	109.333	20.463	20.487
03:58:21	234.91	0	109.417	20.439	20.463
04:03:21	234.792	0	109.5	20.439	20.439
04:08:21	234.63	0	109.583	20.415	20.439
04:13:21	234.35	0	109.667	20.415	20.415
04:18:21	233.822	0	109.75	20.391	20.391
04:23:21	233.919	0	109.833	20.367	20.391
04:28:21	233.412	0	109.917	20.343	20.367
04:33:21	233.768	0	110	20.343	20.343
04:38:21	234.479	0	110.083	20.319	20.343
04:43:21	234.899	0	110.167	20.319	20.319
04:48:21	235.514	0	110.25	20.295	20.319
04:53:21	235.126	0	110.333	20.272	20.295
04:58:21	235.136	0	110.417	20.272	20.272
05:03:21	234.63	0	110.5	20.248	20.272
05:08:21	234.576	0	110.583	20.248	20.248
05:13:21	234.598	0	110.667	20.224	20.224
05:18:21	233.994	0	110.75	20.2	20.224
05:23:21	233.272	0	110.833	20.2	20.2
05:28:21	232.798	0	110.917	20.176	20.2
05:33:21	232.518	0	111	20.152	20.176
05:38:21	232.518	0	111.083	20.152	20.152
05:43:21	232.453	0	111.167	20.128	20.152
05:48:21	231.494	0	111.25	20.128	20.128
05:53:21	230.794	0	111.333	20.104	20.128
05:58:21	230.406	0	111.417	20.104	20.104
06:03:21	230.352	0	111.5	20.081	20.081
06:08:21	229.684	0	111.583	20.057	20.081
06:13:21	230.169	0	111.667	20.057	20.057
06:18:21	231.72	0	111.75	20.033	20.057
06:23:21	231.904	0	111.833	20.033	20.033
06:28:21	231.462	0	111.917	20.009	20.033
06:33:21	231.289	0	112	20.009	20.009
06:38:21	230.654	0	112.083	19.985	19.985
06:43:21	231.128	0	112.167	19.985	19.985
06:48:21	230.481	0	112.25	19.961	19.985
06:53:21	230.503	0	112.333	19.961	19.961
06:58:21	230.244	0	112.417	19.937	19.937
07:03:21	230.395	0	112.5	19.913	19.937
07:08:21	233.1	0	112.583	19.913	19.913
07:13:21	232.83	0	112.667	19.89	19.913
07:18:21	232.852	0	112.75	19.89	19.89
07:23:21	232.561	0	112.833	19.866	19.89
07:28:21	231.753	0	112.917	19.866	19.866
07:33:21	231.656	0	113	19.842	19.866
07:38:21	231.289	0	113.083	19.842	19.842
07:43:21	230.869	0	113.167	19.842	19.842
07:48:21	231.322	0	113.25	19.818	19.818
07:53:21	230.697	0	113.333	19.818	19.818
07:58:21	229.802	0	113.417	19.794	19.818
08:03:21	229.888	0	113.5	19.794	19.794
08:08:21	229.651	0	113.583	19.77	19.794
08:13:21	232.227	0	113.667	19.77	19.77
08:18:21	231.71	0	113.75	19.746	19.77
08:23:21	231.225	0	113.833	19.746	19.746
08:28:21	231.483	0	113.917	19.723	19.746
08:33:21	230.654	0	114	19.723	19.723
08:38:21	230.697	0	114.083	19.699	19.723
08:43:21	230.449	0	114.167	19.699	19.699
08:48:21	230.417	0	114.25	19.675	19.699
08:53:21	230.697	0	114.333	19.675	19.675
08:58:21	230.47	0	114.417	19.675	19.675
09:03:21	230.664	0	114.5	19.651	19.651
09:08:21	229.953	0	114.583	19.651	19.651
09:13:21	230.524	0	114.667	19.627	19.651
09:18:21	230.136	0	114.75	19.627	19.627
09:23:21	230.233	0	114.833	19.603	19.627
09:28:21	230.567	0	114.917	19.603	19.603
09:33:21	230.901	0	115	19.603	19.603
09:38:21	230.46	0	115.083	19.579	19.603
09:43:21	230.794	0	115.167	19.579	19.579
09:48:21	230.643	0	115.25	19.556	19.579
09:53:21	230.718	0	115.333	19.556	19.556
09:58:21	230.46	0	115.417	19.556	19.556
10:03:21	230.557	0	115.5	19.532	19.556
10:08:21	230.244	0	115.583	19.532	19.532
10:13:21	230.039	0	115.667	19.508	19.532
10:18:21	229.932	0	115.75	19.508	19.532
10:23:21	229.662	0	115.833	19.508	19.508
10:28:21	229.274	0	115.917	19.484	19.508
10:33:21	229.824	0	116	19.484	19.484
10:38:21	229.975	0	116.083	19.46	19.484
10:43:21	230.007	0	116.167	19.46	19.46
10:48:21	229.619	0	116.25	19.436	19.46
10:53:21	230.179	0	116.333	19.436	19.46
10:58:21	229.899	0	116.417	19.436	19.436
11:03:21	229.824	0	116.5	19.413	19.436
11:08:21	229.985	0	116.583	19.413	19.436
11:13:21	229.953	0	116.667	19.389	19.413
11:18:21	230.557	0	116.75	19.389	19.413
11:23:21	230.643	0	116.833	19.389	19.389
11:28:21	231.031	0	116.917	19.365	19.389
11:33:21	230.869	0	117	19.365	19.365
11:38:21	230.675	0	117.083	19.365	19.365
11:43:21	230.136	0	117.167	19.341	19.365
11:48:21	230.266	0	117.25	19.341	19.365
11:53:21	230.147	0	117.333	19.341	19.341
11:58:21	229.964	0	117.417	19.317	19.341
12:03:21	230.32	0	117.5	19.317	19.317
12:08:21	230.6	0	117.583	19.293	19.317
12:13:21	230.503	0	117.667	19.293	19.317
12:18:21	229.684	0	117.75	19.293	19.293
12:23:21	229.048	0	117.833	19.27	19.293
12:28:21	229.727	0	117.917	19.27	19.293
12:33:21	229.91	0	118	19.27	19.27
12:38:21	229.985	0	118.083	19.246	19.27
12:43:21	229.813	0	118.167	19.246	19.27
12:48:21	230.169	0	118.25	19.246	19.246
12:53:21	229.91	0	118.333	19.222	19.246
12:58:21	229.856	0	118.417	19.222	19.222
13:03:21	229.21	0	118.5	19.222	19.222
13:08:21	230.136	0	118.583	19.198	19.222
13:13:21	229.942	0	118.667	19.198	19.222
13:18:21	230.427	0	118.75	19.198	19.198
13:23:21	230.018	0	118.833	19.174	19.198
13:28:21	229.835	0	118.917	19.174	19.198
13:33:21	229.651	0	119	19.174	19.174
13:38:21	229.684	0	119.083	19.15	19.174
13:43:21	229.791	0	119.167	19.15	19.174
13:48:21	229.436	0	119.25	19.15	19.15
13:53:21	229.921	0	119.333	19.127	19.15
13:58:21	229.975	0	119.417	19.127	19.15
14:03:21	230.406	0	119.5	19.127	19.127
14:08:21	230.427	0	119.583	19.103	19.127
14:13:21	230.804	0	119.667	19.103	19.127
14:18:21	231.171	0	119.75	19.103	19.103
14:23:21	231.3	0	119.833	19.079	19.103
14:28:21	231.602	0	119.917	19.079	19.103
14:33:21	231.796	0	120	19.079	19.079
14:38:21	232.108	0	120.083	19.079	19.079
14:43:21	232.011	0	120.167	19.055	19.079
14:48:21	231.613	0	120.25	19.055	19.079
14:53:21	232.011	0	120.333	19.031	19.055
14:58:21	231.764	0	120.417	19.031	19.055
15:03:21	231.764	0	120.5	19.031	19.055
15:08:21	231.332	0	120.583	19.031	19.031
15:13:21	232.539	0	120.667	19.007	19.031
15:18:21	232.647	0	120.75	19.007	19.031
15:23:21	233.703	0	120.833	19.007	19.007
15:28:21	234.156	0	120.917	18.984	19.007
15:33:21	233.854	0	121	18.984	19.007
15:38:21	234.404	0	121.083	18.984	19.007
15:43:21	234.382	0	121.167	18.984	18.984
15:48:21	234.511	0	121.25	18.96	18.984
15:53:21	234.652	0	121.333	18.96	18.984
15:58:21	234.856	0	121.417	18.96	18.984
16:03:21	234.641	0	121.5	18.936	18.96
16:08:21	234.414	0	121.583	18.936	18.96
16:13:21	234.587	0	121.667	18.936	18.96
16:18:21	234.759	0	121.75	18.936	18.936
16:23:21	234.684	0	121.833	18.912	18.936
16:28:21	235.277	0	121.917	18.912	18.936
16:33:21	235.384	0	122	18.912	18.936
16:38:21	235.201	0	122.083	18.888	18.912
16:43:21	235.503	0	122.167	18.888	18.912
16:48:21	235.223	0	122.25	18.888	18.912
16:53:21	235.007	0	122.333	18.865	18.888
16:58:21	235.287	0	122.417	18.888	18.888
17:03:21	235.966	0	122.5	18.865	18.888
17:08:21	236.052	0	122.583	18.865	18.888
17:13:21	235.837	0	122.667	18.865	18.865
17:18:21	236.096	0	122.75	18.841	18.865
17:23:21	236.527	0	122.833	18.841	18.865
17:28:21	236.537	0	122.917	18.841	18.841
17:33:21	236.3	0	123	18.841	18.841
17:38:21	236.236	0	123.083	18.817	18.841
17:43:21	236.16	0	123.167	18.817	18.841
17:48:21	236.182	0	123.25	18.817	18.817
17:53:21	235.999	0	123.333	18.793	18.817
17:58:21	236.02	0	123.417	18.793	18.817
18:03:21	236.074	0	123.5	18.793	18.817
18:08:21	235.977	0	123.583	18.793	18.817
18:13:21	235.988	0	123.667	18.793	18.793
18:18:21	236.128	0	123.75	18.769	18.793
18:23:21	235.568	0	123.833	18.769	18.793
18:28:21	235.363	0	123.917	18.769	18.769
18:33:21	235.568	0	124	18.746	18.769
18:38:21	235.514	0	124.083	18.746	18.769
18:43:21	235.708	0	124.167	18.746	18.769
18:48:21	235.837	0	124.25	18.746	18.746
18:53:21	235.848	0	124.333	18.722	18.746
18:58:21	235.826	0	124.417	18.722	18.746
19:03:21	236.096	0	124.5	18.722	18.746
19:08:21	235.729	0	124.583	18.722	18.746
19:13:21	235.46	0	124.667	18.698	18.722
19:18:21	235.945	0	124.75	18.698	18.722
19:23:21	235.955	0	124.833	18.698	18.722
19:28:21	236.365	0	124.917	18.698	18.698
19:33:21	234.921	0	125	18.698	18.698
19:38:21	234.113	0	125.083	18.674	18.698
19:43:21	234.221	0	125.167	18.674	18.698
19:48:21	234.425	0	125.25	18.674	18.674
19:53:21	234.835	0	125.333	18.65	18.674
19:58:21	235.158	0	125.417	18.65	18.674
20:03:21	235.384	0	125.5	18.65	18.674
20:08:21	235.255	0	125.583	18.65	18.65
20:13:21	235.007	0	125.667	18.626	18.65
20:18:21	235.945	0	125.75	18.626	18.65
20:23:21	236.182	0	125.833	18.626	18.65
20:28:21	236.257	0	125.917	18.626	18.626
20:33:21	236.397	0	126	18.603	18.626
20:38:21	234.792	0	126.083	18.603	18.626
20:43:21	234.458	0	126.167	18.603	18.626
20:48:21	234.511	0	126.25	18.603	18.603
20:53:21	234.856	0	126.333	18.603	18.603
20:58:21	235.072	0	126.417	18.579	18.603
21:03:21	234.458	0	126.5	18.579	18.603
21:08:21	234.684	0	126.583	18.579	18.579
21:13:21	235.223	0	126.667	18.579	18.579
21:18:21	235.686	0	126.75	18.555	18.579
21:23:21	235.535	0	126.833	18.555	18.579
21:28:21	235.654	0	126.917	18.555	18.579
21:33:21	235.417	0	127	18.555	18.555
21:38:21	235.503	0	127.083	18.531	18.555
21:43:21	235.665	0	127.167	18.531	18.555
21:48:21	235.589	0	127.25	18.531	18.555
21:53:21	235.277	0	127.333	18.531	18.531
21:58:21	236.473	0	127.417	18.531	18.531
22:03:21	236.397	0	127.5	18.507	18.531
22:08:21	236.99	0	127.583	18.507	18.531
22:13:21	236.968	0	127.667	18.507	18.507
22:18:21	235.869	0	127.75	18.507	18.531
22:23:21	234.501	0	127.833	18.484	18.507
22:28:21	234.533	0	127.917	18.484	18.507
22:33:21	234.846	0	128	18.484	18.507
22:38:21	234.899	0	128.083	18.484	18.484
22:43:21	235.083	0	128.167	18.46	18.484
22:48:21	235.18	0	128.25	18.46	18.484
22:53:21	235.578	0	128.333	18.46	18.484
22:58:21	235.934	0	128.417	18.46	18.484
23:03:21	236.203	0	128.5	18.46	18.46
23:08:21	236.484	0	128.583	18.436	18.46
23:13:21	236.43	0	128.667	18.436	18.46
23:18:21	233.983	0	128.75	18.436	18.46
23:23:21	233.132	0	128.833	18.436	18.436
23:28:21	233.412	0	128.917	18.436	18.436
23:33:21	233.606	0	129	18.412	18.436
23:38:21	233.488	0	129.083	18.412	18.436
23:43:21	233.919	0	129.167	18.412	18.436
23:48:21	234.177	0	129.25	18.412	18.412
23:53:21	234.091	0	129.333	18.412	18.412
23:58:21	234.533	0	129.417	18.388	18.412
00:03:21	234.598	0	129.5	18.388	18.412
00:08:21	234.835	0	129.583	18.388	18.388
00:13:21	234.975	0	129.667	18.388	18.388
00:18:21	234.986	0	129.75	18.365	18.388
00:23:21	235.007	0	129.833	18.365	18.388
00:28:21	235.309	0	129.917	18.365	18.388
00:33:21	235.568	0	130	18.365	18.365
00:38:21	235.212	0	130.083	18.365	18.365
00:43:21	235.212	0	130.167	18.341	18.365
00:48:21	234.964	0	130.25	18.341	18.365
00:53:21	235.19	0	130.333	18.341	18.365
00:58:21	235.029	0	130.417	18.341	18.341
01:03:21	235.266	0	130.5	18.341	18.341
01:08:21	235.675	0	130.583	18.317	18.341
01:13:21	235.524	0	130.667	18.317	18.341
01:18:21	235.632	0	130.75	18.317	18.341
01:23:21	235.815	0	130.833	18.317	18.317
01:28:21	235.848	0	130.917	18.317	18.317
01:33:21	235.912	0	131	18.293	18.317
01:38:21	236.052	0	131.083	18.293	18.317
01:43:21	235.751	0	131.167	18.293	18.317
01:48:21	236.02	0	131.25	18.293	18.317
01:53:21	235.762	0	131.333	18.293	18.293
01:58:21	235.902	0	131.417	18.293	18.293
02:03:21	235.697	0	131.5	18.27	18.293
02:08:21	235.848	0	131.583	18.27	18.293
02:13:21	235.912	0	131.667	18.27	18.293
02:18:21	235.869	0	131.75	18.27	18.27
02:23:21	235.815	0	131.833	18.27	18.27
02:28:21	235.966	0	131.917	18.246	18.27
02:33:21	236.58	0	132	18.246	18.27
02:38:21	233.164	0	132.083	18.246	18.27
02:43:21	232.906	0	132.167	18.246	18.27
02:48:21	233.035	0	132.25	18.246	18.246
02:53:21	233.305	0	132.333	18.222	18.246
02:58:21	233.348	0	132.417	18.222	18.246
03:03:21	233.272	0	132.5	18.222	18.222
03:08:21	233.132	0	132.583	18.222	18.222
03:13:21	233.175	0	132.667	18.222	18.222
03:18:21	233.057	0	132.75	18.198	18.222
03:23:21	232.83	0	132.833	18.198	18.222
03:28:21	233.046	0	132.917	18.198	18.222
03:33:21	232.83	0	133	18.198	18.198
03:38:21	232.302	0	133.083	18.198	18.198
03:43:21	232.044	0	133.167	18.198	18.198
03:48:21	231.871	0	133.25	18.174	18.198
03:53:21	232.195	0	133.333	18.174	18.198
03:58:21	231.677	0	133.417	18.174	18.174
04:03:21	231.677	0	133.5	18.174	18.174
04:08:21	231.677	0	133.583	18.174	18.174
04:13:21	231.537	0	133.667	18.151	18.174
04:18:21	231.3	0	133.75	18.151	18.174
04:23:21	231.365	0	133.833	18.151	18.174
04:28:21	231.192	0	133.917	18.151	18.151
04:33:21	231.214	0	134	18.151	18.151
04:38:21	231.386	0	134.083	18.151	18.151
04:43:21	231.354	0	134.167	18.127	18.151
04:48:21	232.507	0	134.25	18.127	18.151
04:53:21	232.259	0	134.333	18.127	18.127
04:58:21	231.828	0	134.417	18.127	18.127
05:03:21	231.958	0	134.5	18.127	18.127
05:08:21	232.098	0	134.583	18.103	18.127
05:13:21	231.667	0	134.667	18.103	18.127
05:18:21	231.365	0	134.75	18.103	18.127
05:23:21	230.804	0	134.833	18.103	18.103
05:28:21	230.47	0	134.917	18.079	18.103
05:33:21	232.367	0	135	18.079	18.103
05:38:21	232.507	0	135.083	18.079	18.103
05:43:21	232.335	0	135.167	18.079	18.103
05:48:21	232.162	0	135.25	18.079	18.103
05:53:21	231.537	0	135.333	18.079	18.079
05:58:21	231.408	0	135.417	18.055	18.079
06:03:21	230.675	0	135.5	18.055	18.079
06:08:21	231.979	0	135.583	18.055	18.079
06:13:21	232.507	0	135.667	18.055	18.079
06:18:21	232.777	0	135.75	18.055	18.055
06:23:21	232.356	0	135.833	18.055	18.055
06:28:21	232.507	0	135.917	18.055	18.055
06:33:21	231.764	0	136	18.032	18.055
06:38:21	231.785	0	136.083	18.032	18.055
06:43:21	231.462	0	136.167	18.032	18.055
06:48:21	230.891	0	136.25	18.032	18.032
06:53:21	230.384	0	136.333	18.032	18.032
06:58:21	230.998	0	136.417	18.008	18.032
07:03:21	233.035	0	136.5	18.008	18.032
07:08:21	232.938	0	136.583	18.008	18.032
07:13:21	231.494	0	136.667	18.008	18.032
07:18:21	231.548	0	136.75	18.008	18.008
07:23:21	231.063	0	136.833	18.008	18.008
07:28:21	230.643	0	136.917	17.984	18.008
07:33:21	230.589	0	137	17.984	18.008
07:38:21	230.707	0	137.083	17.984	18.008
07:43:21	230.718	0	137.167	17.984	18.008
07:48:21	229.641	0	137.25	17.984	17.984
07:53:21	232.011	0	137.333	17.984	17.984
07:58:21	231.559	0	137.417	17.984	17.984
08:03:21	230.945	0	137.5	17.96	17.984
08:08:21	231.074	0	137.583	17.96	17.984
08:13:21	229.673	0	137.667	17.96	17.984
08:18:21	230.524	0	137.75	17.96	17.984
08:23:21	230.179	0	137.833	17.96	17.96
08:28:21	230.449	0	137.917	17.96	17.96
08:33:21	230.244	0	138	17.96	17.96
08:38:21	229.641	0	138.083	17.936	17.96
08:43:21	229.641	0	138.167	17.936	17.96
08:48:21	229.727	0	138.25	17.936	17.936
08:53:21	230.039	0	138.333	17.936	17.936
08:58:21	229.738	0	138.417	17.936	17.936
09:03:21	229.856	0	138.5	17.936	17.936
09:08:21	229.404	0	138.583	17.913	17.936
09:13:21	229.479	0	138.667	17.913	17.936
09:18:21	229.662	0	138.75	17.913	17.913
09:23:21	230.029	0	138.833	17.913	17.913
09:28:21	230.481	0	138.917	17.913	17.913
09:33:21	230.427	0	139	17.913	17.913
09:38:21	230.136	0	139.083	17.889	17.913
09:43:21	230.74	0	139.167	17.889	17.913
09:48:21	230.998	0	139.25	17.889	17.913
09:53:21	230.169	0	139.333	17.889	17.913
09:58:21	230.082	0	139.417	17.889	17.889
10:03:21	230.212	0	139.5	17.889	17.889
10:08:21	230.136	0	139.583	17.889	17.889
10:13:21	230.082	0	139.667	17.865	17.889
10:18:21	230.255	0	139.75	17.865	17.889
10:23:21	230.891	0	139.833	17.865	17.889
10:28:21	230.589	0	139.917	17.865	17.865
10:33:21	229.942	0	140	17.865	17.865
10:38:21	230.373	0	140.083	17.865	17.865
10:43:21	230.955	0	140.167	17.841	17.865
10:48:21	231.02	0	140.25	17.841	17.865
10:53:21	230.395	0	140.333	17.841	17.865
10:58:21	230.761	0	140.417	17.841	17.865
11:03:21	231.02	0	140.5	17.841	17.841
11:08:21	230.804	0	140.583	17.841	17.841
11:13:21	230.729	0	140.667	17.841	17.841
11:18:21	230.945	0	140.75	17.841	17.841
11:23:21	231.203	0	140.833	17.818	17.841
11:28:21	231.095	0	140.917	17.818	17.841
11:33:21	230.707	0	141	17.818	17.841
11:38:21	230.74	0	141.083	17.818	17.818
11:43:21	230.858	0	141.167	17.818	17.818
11:48:21	230.082	0	141.25	17.818	17.818
11:53:21	230.589	0	141.333	17.818	17.818
11:58:21	230.492	0	141.417	17.794	17.818
12:03:21	230.848	0	141.5	17.794	17.818
12:08:21	231.042	0	141.583	17.794	17.818
12:13:21	231.343	0	141.667	17.794	17.794
12:18:21	230.923	0	141.75	17.794	17.794
12:23:21	230.848	0	141.833	17.794	17.794
12:28:21	230.61	0	141.917	17.77	17.794
12:33:21	230.61	0	142	17.77	17.794
12:38:21	231.268	0	142.083	17.77	17.794
12:43:21	230.923	0	142.167	17.77	17.794
12:48:21	230.848	0	142.25	17.77	17.794
12:53:21	230.901	0	142.333	17.77	17.77
12:58:21	230.988	0	142.417	17.77	17.77
13:03:21	231.246	0	142.5	17.77	17.77
13:08:21	231.882	0	142.583	17.77	17.77
13:13:21	231.936	0	142.667	17.746	17.77
13:18:21	231.494	0	142.75	17.746	17.77
13:23:21	231.494	0	142.833	17.746	17.77
13:28:21	231.613	0	142.917	17.746	17.746
13:33:21	231.419	0	143	17.746	17.746
13:38:21	231.246	0	143.083	17.746	17.746
13:43:21	231.203	0	143.167	17.746	17.746
13:48:21	231.473	0	143.25	17.746	17.746
13:53:21	231.623	0	143.333	17.722	17.746
13:58:21	231.871	0	143.417	17.722	17.746
14:03:21	232.162	0	143.5	17.722	17.746
14:08:21	232.195	0	143.583	17.722	17.746
14:13:21	232.464	0	143.667	17.722	17.722
14:18:21	232.701	0	143.75	17.722	17.722
14:23:21	232.723	0	143.833	17.722	17.722
14:28:21	232.992	0	143.917	17.699	17.722
14:33:21	232.723	0	144	17.699	17.722
14:38:21	232.83	0	144.083	17.699	17.722
14:43:21	233.089	0	144.167	17.699	17.722
14:48:21	233.186	0	144.25	17.699	17.722
14:53:21	233.197	0	144.333	17.699	17.699
14:58:21	233.272	0	144.417	17.699	17.699
15:03:21	233.477	0	144.5	17.699	17.699
15:08:21	233.305	0	144.583	17.675	17.699
15:13:21	233.876	0	144.667	17.675	17.699
15:18:21	233.962	0	144.75	17.675	17.699
15:23:21	234.684	0	144.833	17.675	17.675
15:28:21	234.932	0	144.917	17.675	17.699
15:33:21	234.964	0	145	17.675	17.699
15:38:21	234.867	0	145.083	17.675	17.675
15:43:21	234.608	0	145.167	17.675	17.675
15:48:21	235.212	0	145.25	17.651	17.675
15:53:21	235.104	0	145.333	17.651	17.675
15:58:21	235.255	0	145.417	17.651	17.675
16:03:21	235.104	0	145.5	17.651	17.675
16:08:21	235.244	0	145.583	17.651	17.675
16:13:21	235.223	0	145.667	17.651	17.675
16:18:21	235.266	0	145.75	17.651	17.651
16:23:21	235.74	0	145.833	17.651	17.651
16:28:21	235.751	0	145.917	17.651	17.651
16:33:21	235.805	0	146	17.627	17.651
16:38:21	236.128	0	146.083	17.627	17.651
16:43:21	236.106	0	146.167	17.627	17.651
16:48:21	236.042	0	146.25	17.627	17.651
16:53:21	236.354	0	146.333	17.627	17.651
16:58:21	236.365	0	146.417	17.627	17.651
17:03:21	236.031	0	146.5	17.627	17.627
17:08:21	236.106	0	146.583	17.627	17.627
17:13:21	236.397	0	146.667	17.627	17.627
17:18:21	236.516	0	146.75	17.627	17.627
17:23:21	236.731	0	146.833	17.603	17.627
17:28:21	236.828	0	146.917	17.603	17.627
17:33:21	236.052	0	147	17.603	17.627
17:38:21	233.671	0	147.083	17.603	17.627
17:43:21	233.261	0	147.167	17.603	17.627
17:48:21	233.488	0	147.25	17.603	17.627
17:53:21	233.305	0	147.333	17.603	17.603
17:58:21	233.542	0	147.417	17.603	17.603
18:03:21	233.251	0	147.5	17.58	17.603
18:08:21	233.186	0	147.583	17.58	17.603
18:13:21	233.639	0	147.667	17.58	17.603
18:18:21	233.434	0	147.75	17.58	17.603
18:23:21	233.671	0	147.833	17.58	17.603
18:28:21	233.499	0	147.917	17.58	17.58
18:33:21	233.628	0	148	17.58	17.58
18:38:21	233.38	0	148.083	17.58	17.58
18:43:21	233.962	0	148.167	17.58	17.58
18:48:21	234.145	0	148.25	17.556	17.58
18:53:21	233.725	0	148.333	17.556	17.58
18:58:21	233.509	0	148.417	17.556	17.58
19:03:21	233.983	0	148.5	17.556	17.58
19:08:21	234.027	0	148.583	17.556	17.556
19:13:21	233.908	0	148.667	17.556	17.556
19:18:21	233.908	0	148.75	17.556	17.556
19:23:21	233.833	0	148.833	17.556	17.556
19:28:21	234.522	0	148.917	17.532	17.556
19:33:21	234.684	0	149	17.532	17.556
19:38:21	233.703	0	149.083	17.532	17.556
19:43:21	231.861	0	149.167	17.532	17.556
19:48:21	232.593	0	149.25	17.532	17.532
19:53:21	232.464	0	149.333	17.532	17.532
19:58:21	232.647	0	149.417	17.532	17.532
20:03:21	232.733	0	149.5	17.532	17.532
20:08:21	233.466	0	149.583	17.508	17.532
20:13:21	233.186	0	149.667	17.508	17.532
20:18:21	233.509	0	149.75	17.508	17.532
20:23:21	233.294	0	149.833	17.508	17.532
20:28:21	233.358	0	149.917	17.508	17.508
20:33:21	233.833	0	150	17.508	17.508
20:38:21	234.511	0	150.083	17.508	17.508
20:43:21	234.889	0	150.167	17.508	17.508
20:48:21	234.932	0	150.25	17.485	17.508
20:53:21	235.406	0	150.333	17.485	17.508
20:58:21	235.815	0	150.417	17.485	17.508
21:03:21	236.031	0	150.5	17.485	17.508
21:08:21	235.988	0	150.583	17.485	17.508
21:13:21	236.236	0	150.667	17.485	17.485
21:18:21	236.009	0	150.75	17.485	17.485
21:23:21	235.826	0	150.833	17.485	17.485
21:28:21	235.794	0	150.917	17.485	17.485
21:33:21	235.438	0	151	17.461	17.485
21:38:21	235.147	0	151.083	17.461	17.485
21:43:21	235.04	0	151.167	17.461	17.485
21:48:21	235.471	0	151.25	17.461	17.485
21:53:21	235.708	0	151.333	17.461	17.485
21:58:21	234.404	0	151.417	17.461	17.461
22:03:21	233.229	0	151.5	17.461	17.461
22:08:21	233.358	0	151.583	17.461	17.461
22:13:21	233.154	0	151.667	17.461	17.461
22:18:21	233.067	0	151.75	17.437	17.461
22:23:21	233.154	0	151.833	17.437	17.461
22:28:21	233.509	0	151.917	17.437	17.461
22:33:21	233.455	0	152	17.437	17.437
22:38:21	234.242	0	152.083	17.437	17.437
22:43:21	233.789	0	152.167	17.437	17.437
22:48:21	233.94	0	152.25	17.437	17.437
22:53:21	234.522	0	152.333	17.437	17.437
22:58:21	235.233	0	152.417	17.413	17.437
23:03:21	235.524	0	152.5	17.413	17.437
23:08:21	236.214	0	152.583	17.413	17.437
23:13:21	235.783	0	152.667	17.413	17.437
23:18:21	233.294	0	152.75	17.413	17.437
23:23:21	233.477	0	152.833	17.413	17.413
23:28:21	233.531	0	152.917	17.413	17.413
23:33:21	234.048	0	153	17.413	17.413
23:38:21	233.962	0	153.083	17.389	17.413
23:43:21	234.544	0	153.167	17.389	17.413
23:48:21	234.802	0	153.25	17.389	17.413
23:53:21	235.19	0	153.333	17.389	17.413
23:58:21	235.287	0	153.417	17.389	17.413
00:03:21	235.6	0	153.5	17.389	17.413
00:08:21	235.675	0	153.583	17.389	17.413
00:13:21	235.471	0	153.667	17.389	17.389
00:18:21	234.867	0	153.75	17.389	17.389
00:23:21	234.91	0	153.833	17.389	17.389
00:28:21	235.233	0	153.917	17.389	17.389
00:33:21	235.449	0	154	17.389	17.389
00:38:21	235.718	0	154.083	17.389	17.389
00:43:21	235.708	0	154.167	17.366	17.389
00:48:21	235.578	0	154.25	17.366	17.389
00:53:21	235.492	0	154.333	17.366	17.389
00:58:21	235.341	0	154.417	17.366	17.366
01:03:21	235.287	0	154.5	17.366	17.366
01:08:21	235.514	0	154.583	17.366	17.366
01:13:21	235.643	0	154.667	17.366	17.366
01:18:21	234.716	0	154.75	17.366	17.366
01:23:21	235.266	0	154.833	17.366	17.366
01:28:21	235.751	0	154.917	17.342	17.366
01:33:21	235.815	0	155	17.342	17.366
01:38:21	235.815	0	155.083	17.342	17.366
01:43:21	235.88	0	155.167	17.342	17.366
01:48:21	236.02	0	155.25	17.342	17.342
01:53:21	235.718	0	155.333	17.342	17.366
01:58:21	235.805	0	155.417	17.342	17.342
02:03:21	235.869	0	155.5	17.342	17.342
02:08:21	235.891	0	155.583	17.318	17.342
02:13:21	235.869	0	155.667	17.318	17.342
02:18:21	235.611	0	155.75	17.318	17.342
02:23:21	235.675	0	155.833	17.318	17.342
02:28:21	235.578	0	155.917	17.318	17.342
02:33:21	235.772	0	156	17.318	17.318
02:38:21	236.29	0	156.083	17.318	17.318
02:43:21	234.199	0	156.167	17.318	17.318
02:48:21	233.046	0	156.25	17.318	17.318
02:53:21	233.057	0	156.333	17.318	17.318
02:58:21	232.68	0	156.417	17.294	17.318
03:03:21	233.057	0	156.5	17.294	17.318
03:08:21	232.82	0	156.583	17.294	17.318
03:13:21	233.003	0	156.667	17.294	17.294
03:18:21	232.981	0	156.75	17.294	17.294
03:23:21	232.593	0	156.833	17.294	17.294
03:28:21	232.205	0	156.917	17.294	17.294
03:33:21	232.141	0	157	17.294	17.294
03:38:21	232.195	0	157.083	17.271	17.294
03:43:21	232.292	0	157.167	17.271	17.294
03:48:21	232.13	0	157.25	17.271	17.294
03:53:21	231.839	0	157.333	17.271	17.294
03:58:21	231.645	0	157.417	17.271	17.271
04:03:21	231.925	0	157.5	17.271	17.271
04:08:21	231.979	0	157.583	17.271	17.271
04:13:21	231.85	0	157.667	17.271	17.271
04:18:21	231.667	0	157.75	17.271	17.271
04:23:21	231.494	0	157.833	17.271	17.271
04:28:21	231.634	0	157.917	17.271	17.271
04:33:21	231.753	0	158	17.247	17.271
04:38:21	232.83	0	158.083	17.247	17.271
04:43:21	233.154	0	158.167	17.247	17.271
04:48:21	233.24	0	158.25	17.247	17.247
04:53:21	232.83	0	158.333	17.247	17.247
04:58:21	232.658	0	158.417	17.247	17.247
05:03:21	232.475	0	158.5	17.247	17.247
05:08:21	232.141	0	158.583	17.247	17.247
05:13:21	232.216	0	158.667	17.223	17.247
05:18:21	231.268	0	158.75	17.223	17.247
05:23:21	230.858	0	158.833	17.223	17.247
05:28:21	230.589	0	158.917	17.223	17.247
05:33:21	230.341	0	159	17.223	17.247
05:38:21	230.535	0	159.083	17.223	17.223
05:43:21	231.731	0	159.167	17.223	17.223
05:48:21	232.68	0	159.25	17.223	17.223
05:53:21	231.645	0	159.333	17.223	17.223
05:58:21	231.667	0	159.417	17.223	17.223
06:03:21	231.613	0	159.5	17.199	17.223
06:08:21	231.085	0	159.583	17.199	17.223
06:13:21	231.354	0	159.667	17.199	17.223
06:18:21	230.223	0	159.75	17.199	17.223
06:23:21	230.072	0	159.833	17.199	17.223
06:28:21	232.216	0	159.917	17.199	17.223
06:33:21	232.098	0	160	17.199	17.199
06:38:21	231.731	0	160.083	17.199	17.199
06:43:21	231.085	0	160.167	17.199	17.199
06:48:21	231.128	0	160.25	17.199	17.199
06:53:21	230.05	0	160.333	17.199	17.199
06:58:21	230.298	0	160.417	17.199	17.199
07:03:21	231.031	0	160.5	17.175	17.199
07:08:21	232.356	0	160.583	17.175	17.199
07:13:21	232.292	0	160.667	17.175	17.199
07:18:21	232.108	0	160.75	17.175	17.199
07:23:21	231.796	0	160.833	17.175	17.199
07:28:21	231.505	0	160.917	17.175	17.175
07:33:21	231.408	0	161	17.175	17.175
07:38:21	230.654	0	161.083	17.175	17.175
07:43:21	229.748	0	161.167	17.175	17.175
07:48:21	229.878	0	161.25	17.175	17.175
07:53:21	229.253	0	161.333	17.175	17.175
07:58:21	229.845	0	161.417	17.152	17.175
08:03:21	228.994	0	161.5	17.152	17.175
08:08:21	228.897	0	161.583	17.152	17.175
08:13:21	228.563	0	161.667	17.152	17.175
08:18:21	230.858	0	161.75	17.152	17.152
08:23:21	230.632	0	161.833	17.152	17.152
08:28:21	230.287	0	161.917	17.152	17.152
08:33:21	230.136	0	162	17.152	17.152
08:38:21	229.975	0	162.083	17.152	17.152
08:43:21	230.158	0	162.167	17.152	17.152
08:48:21	230.6	0	162.25	17.152	17.152
08:53:21	230.47	0	162.333	17.128	17.152
08:58:21	231.117	0	162.417	17.128	17.152
09:03:21	230.912	0	162.5	17.128	17.152
09:08:21	230.082	0	162.583	17.128	17.152
09:13:21	230.126	0	162.667	17.128	17.152
09:18:21	230.373	0	162.75	17.128	17.152
09:23:21	230.686	0	162.833	17.128	17.152
09:28:21	230.772	0	162.917	17.128	17.128
09:33:21	230.201	0	163	17.128	17.128
09:38:21	230.212	0	163.083	17.128	17.128
09:43:21	230.341	0	163.167	17.128	17.128
09:48:21	230.126	0	163.25	17.128	17.128
09:53:21	230.901	0	163.333	17.128	17.128
09:58:21	230.406	0	163.417	17.104	17.128
10:03:21	230.039	0	163.5	17.104	17.128
10:08:21	230.061	0	163.583	17.104	17.128
10:13:21	230.05	0	163.667	17.104	17.128
10:18:21	230.018	0	163.75	17.104	17.128
10:23:21	230.621	0	163.833	17.104	17.128
10:28:21	229.985	0	163.917	17.104	17.104
10:33:21	230.179	0	164	17.104	17.104
10:38:21	229.296	0	164.083	17.104	17.128
10:43:21	229.134	0	164.167	17.104	17.104
10:48:21	229.188	0	164.25	17.104	17.104
10:53:21	229.716	0	164.333	17.104	17.104
10:58:21	229.845	0	164.417	17.08	17.104
11:03:21	229.49	0	164.5	17.08	17.104
11:08:21	229.791	0	164.583	17.104	17.104
11:13:21	230.007	0	164.667	17.08	17.104
11:18:21	230.276	0	164.75	17.08	17.104
11:23:21	230.104	0	164.833	17.08	17.104
11:28:21	230.481	0	164.917	17.08	17.104
11:33:21	230.32	0	165	17.08	17.08
11:38:21	229.878	0	165.083	17.08	17.08
11:43:21	230.147	0	165.167	17.08	17.08
11:48:21	230.007	0	165.25	17.08	17.08
11:53:21	229.867	0	165.333	17.08	17.08
11:58:21	230.395	0	165.417	17.08	17.08
12:03:21	230.524	0	165.5	17.08	17.08
12:08:21	230.804	0	165.583	17.08	17.08
12:13:21	230.384	0	165.667	17.08	17.08
12:18:21	230.244	0	165.75	17.08	17.08
12:23:21	230.341	0	165.833	17.08	17.08
12:28:21	230.223	0	165.917	17.057	17.08
12:33:21	229.522	0	166	17.057	17.08
12:38:21	229.791	0	166.083	17.057	17.08
12:43:21	229.964	0	166.167	17.057	17.08
12:48:21	229.953	0	166.25	17.057	17.057
12:53:21	230.826	0	166.333	17.057	17.057
12:58:21	230.988	0	166.417	17.057	17.057
13:03:21	231.386	0	166.5	17.057	17.057
[truncated: 306 more rows]

## Sheet: cxC 6,1kW
Time	Voltage, V	Current, A	Hours	EST, °C	LST, °C	Time	Hours	Tair °C
08:03:27	232.195	0	0	14.696	14.724	08:03:27	0	8.7
08:08:27	227.686	16.6156	0.0833333	14.677	15.77	09:03:27	1	9.4
08:13:27	222.502	27.6801	0.166667	14.743	17.721	10:03:27	2	11.1
08:18:27	222.157	27.6355	0.25	15.794	19.103	11:03:27	3	12.2
08:22:08	221.953	27.612	0.333333	16.793	20.132	12:03:27	4	13
08:27:08	222.093	27.6261	0.416667	17.745	21.092	13:03:27	5	13.9
08:32:08	221.866	27.5792	0.5	18.483	21.814	14:03:27	6	14.2
08:37:08	221.371	27.5299	0.583333	19.151	22.467	15:03:27	7	14.4
08:42:08	221.36	27.5135	0.666667	19.701	23	16:03:27	8	14.5
08:47:08	221.166	27.5041	0.75	20.18	23.487	17:03:27	9	14
08:52:08	221.522	27.551	0.833333	20.611	23.926	18:03:27	10	11.8
08:57:08	221.36	27.5205	0.916667	20.995	24.317	19:03:27	11	11
09:02:08	220.864	27.4549	1	21.356	24.636	20:03:27	12	10.5
09:07:08	220.81	27.4502	1.08333	21.645	24.956	21:03:27	13	10.2
09:12:08	220.045	27.3469	1.16667	21.935	25.202	22:03:27	14	10.5
09:17:08	221.285	27.4924	1.25	22.176	25.498	23:03:27	15	10.5
09:22:08	221.349	27.5041	1.33333	22.418	25.72	1900-01-01 00:03:27	16	10.3
09:27:08	221.446	27.5182	1.41667	22.636	25.968	1900-01-01 01:03:27	17	9.7
09:32:08	221.576	27.5393	1.5	22.854	26.192	1900-01-01 02:03:27	18	9
09:37:08	221.597	27.5252	1.58333	23.048	26.366	1900-01-01 03:03:27	19	8.9
09:42:08	221.349	27.5041	1.66667	23.218	26.54	1900-01-01 04:03:27	20	8.4
09:47:08	220.351	27.6144	1.75	23.413	26.74	1900-01-01 05:03:27	21	8.1
09:52:08	220.836	27.6895	1.83333	23.583	26.939	1900-01-01 06:03:27	22	6.7
09:57:08	221.052	27.7035	1.91667	23.729	27.115	1900-01-01 07:03:27	23	6.1
10:02:08	221.871	27.7997	2	23.9	27.29	1900-01-01 08:03:27	24	6.7
10:07:08	216.321	27.8349	2.08333	23.831	27.316	1900-01-01 09:03:27	25	7.6
10:12:08	216.224	27.8255	2.16667	23.977	27.465	1900-01-01 10:03:27	26	9
10:17:08	216.138	27.8138	2.25	24.123	27.59	1900-01-01 11:03:27	27	10.5
10:22:08	216.213	27.8255	2.33333	24.244	27.715	1900-01-01 12:03:27	28	11.2
10:27:08	218.778	28.1329	2.41667	24.366	27.914	1900-01-01 13:03:27	29	11.9
10:32:08	219.08	28.1657	2.5	24.487	28.065	1900-01-01 14:03:27	30	12.4
10:37:08	218.811	28.1352	2.58333	24.634	28.19	1900-01-01 15:03:27	31	12.8
10:42:08	218.918	28.1446	2.66667	24.78	28.34	1900-01-01 16:03:27	32	12.6
10:47:08	218.832	28.1329	2.75	24.902	28.441	1900-01-01 17:03:27	33	12
10:52:08	218.897	28.1399	2.83333	25.024	28.566	1900-01-01 18:03:27	34	10.4
10:57:08	219.166	28.1704	2.91667	25.122	28.692	1900-01-01 19:03:27	35	9
11:02:08	219.242	28.1775	3	25.244	28.818	1900-01-01 20:03:27	36	8.2
11:07:08	219.145	28.1704	3.08333	25.342	28.894	1900-01-01 21:03:27	37	8
11:12:08	219.037	28.1587	3.16667	25.44	28.995	1900-01-01 22:03:27	38	7.5
11:17:08	218.875	28.1376	3.25	25.514	29.071	1900-01-01 23:03:27	39	6.8
11:22:08	218.789	28.1282	3.33333	25.612	29.172	1900-01-02 00:03:27	40	6.1
11:27:08	218.908	28.1423	3.41667	25.686	29.248	1900-01-02 01:03:27	41	5.8
11:32:08	218.563	28.1001	3.5	25.784	29.324	1900-01-02 02:03:27	42	5.2
11:37:08	218.681	28.1141	3.58333	25.858	29.4	1900-01-02 03:03:27	43	4.9
11:42:08	219.155	28.1704	3.66667	25.931	29.501	1900-01-02 04:03:27	44	4
11:47:08	218.875	28.1329	3.75	26.03	29.577	1900-01-02 05:03:27	45	3.6
11:52:08	219.069	28.1611	3.83333	26.079	29.628	1900-01-02 06:03:27	46	3.3
11:57:08	218.972	28.1446	3.91667	26.153	29.704	1900-01-02 07:03:27	47	3
12:02:08	218.897	28.1352	4	26.227	29.781	1900-01-02 08:03:27	48	3.6
12:07:08	218.681	28.1094	4.08333	26.301	29.831	1900-01-02 09:03:27	49	3.7
12:12:08	218.703	28.1094	4.16667	26.375	29.908	1900-01-02 10:03:27	50	5.9
12:17:08	218.886	28.1306	4.25	26.399	29.959	1900-01-02 11:03:27	51	8
12:22:08	218.778	28.1165	4.33333	26.498	30.035	1900-01-02 12:03:27	52	10.1
12:27:08	218.8	28.1212	4.41667	26.548	30.086	1900-01-02 13:03:27	53	11.8
12:32:08	218.778	28.1141	4.5	26.597	30.137	1900-01-02 14:03:27	54	13.4
12:37:08	218.811	28.1212	4.58333	26.647	30.189	1900-01-02 15:03:27	55	13.8
12:42:08	219.048	28.147	4.66667	26.696	30.265	1900-01-02 16:03:27	56	13.6
12:47:08	219.252	28.1751	4.75	26.77	30.316	1900-01-02 17:03:27	57	13.1
12:52:08	219.511	28.2009	4.83333	26.82	30.393	1900-01-02 18:03:27	58	11.3
12:57:08	219.533	28.208	4.91667	26.894	30.444	1900-01-02 19:03:27	59	10.2
13:02:08	219.554	28.2056	5	26.944	30.496	1900-01-02 20:03:27	60	9.9
13:07:08	219.489	28.1986	5.08333	26.993	30.547	1900-01-02 21:03:27	61	9.8
13:12:08	219.36	28.1845	5.16667	27.043	30.598	1900-01-02 22:03:27	62	8.5
13:17:08	219.188	28.1634	5.25	27.093	30.65	1900-01-02 23:03:27	63	7.8
13:22:08	219.533	28.1986	5.33333	27.167	30.727	1900-01-03 00:03:27	64	7.4
13:27:08	219.716	28.2221	5.41667	27.192	30.753	1900-01-03 01:03:27	65	6.9
13:32:08	219.791	28.2338	5.5	27.242	30.804	1900-01-03 02:03:27	66	7.4
13:37:08	219.867	28.2455	5.58333	27.291	30.881	1900-01-03 03:03:27	67	7
13:42:08	219.996	28.2572	5.66667	27.341	30.933	1900-01-03 04:03:27	68	8
13:47:08	220.19	28.2854	5.75	27.391	30.984	1900-01-03 05:03:27	69	8.3
13:52:08	220.373	28.3042	5.83333	27.441	31.036	1900-01-03 06:03:27	70	8.7
13:57:08	220.449	28.3136	5.91667	27.49	31.062	1900-01-03 07:03:27	71	9.4
14:02:08	220.459	28.3159	6	27.54	31.139	1900-01-03 08:03:27	72	10.5
14:07:08	220.718	28.3394	6.08333	27.59	31.191	1900-01-03 09:03:27	73	11.4
14:12:08	220.513	28.3159	6.16667	27.64	31.242	1900-01-03 10:03:27	74	14.1
14:17:08	220.427	28.3089	6.25	27.69	31.268	1900-01-03 11:03:27	75	15.6
14:22:08	220.664	28.3323	6.33333	27.74	31.32	1900-01-03 12:03:27	76	15.9
14:27:08	220.826	28.3511	6.41667	27.765	31.372	1900-01-03 13:03:27	77	15.8
14:32:08	220.643	28.33	6.5	27.815	31.424	1900-01-03 14:03:27	78	15.7
14:37:08	220.632	28.33	6.58333	27.865	31.449	1900-01-03 15:03:27	79	15.3
14:42:08	221.052	28.3792	6.66667	27.889	31.501	1900-01-03 16:03:27	80	14.9
14:47:08	220.783	28.3487	6.75	27.939	31.527	1900-01-03 17:03:27	81	14.4
14:52:08	220.847	28.3558	6.83333	27.99	31.579	1900-01-03 18:03:27	82	14.2
14:57:08	220.88	28.3605	6.91667	28.015	31.605	1900-01-03 19:03:27	83	13.3
15:02:08	220.524	28.3136	7	28.065	31.657	1900-01-03 20:03:27	84	13.1
15:07:08	218.476	28.0649	7.08333	28.09	31.631	1900-01-03 21:03:27	85	13
15:12:08	218.972	28.1259	7.16667	28.115	31.657	1900-01-03 22:03:27	86	12.8
15:17:08	219.145	28.1446	7.25	28.115	31.683	1900-01-03 23:03:27	87	9.7
15:22:08	218.864	28.1118	7.33333	28.14	31.683	1900-01-04 00:03:27	88	8.9
15:27:08	219.134	28.1376	7.41667	28.165	31.709	1900-01-04 01:03:27	89	8.2
15:32:08	219.295	28.1611	7.5	28.19	31.735	1900-01-04 02:03:27	90	7.8
15:37:08	219.436	28.1798	7.58333	28.215	31.787	1900-01-04 03:03:27	91	7.8
15:42:08	219.554	28.1916	7.66667	28.24	31.813	1900-01-04 04:03:27	92	7.5
15:47:08	219.177	28.1446	7.75	28.29	31.813	1900-01-04 05:03:27	93	7.4
15:52:08	218.854	28.1047	7.83333	28.315	31.839	1900-01-04 06:03:27	94	7.1
15:57:08	218.606	28.0766	7.91667	28.315	31.839	1900-01-04 07:03:27	95	7
16:02:08	218.789	28.1001	8	28.34	31.865	1900-01-04 08:03:27	96	6.8
16:07:08	218.358	28.0461	8.08333	28.365	31.891	1900-01-04 09:03:27	97	6.7
16:12:08	218.39	28.0508	8.16667	28.39	31.891	1900-01-04 10:03:27	98	6.7
16:17:08	218.239	28.0297	8.25	28.39	31.917	1900-01-04 11:03:27	99	7.4
16:22:08	218.175	28.0203	8.33333	28.441	31.943	1900-01-04 12:03:27	100	7.5
16:27:08	218.25	28.032	8.41667	28.441	31.969	1900-01-04 13:03:27	101	9.2
16:32:08	218.121	28.0156	8.5	28.466	31.969	1900-01-04 14:03:27	102	9.2
16:37:08	217.851	27.9851	8.58333	28.466	31.995	1900-01-04 15:03:27	103	9.8
16:42:08	217.69	27.9663	8.66667	28.491	31.995	1900-01-04 16:03:27	104	9.3
16:47:08	217.539	27.9475	8.75	28.516	31.995	1900-01-04 17:03:27	105	8.6
16:52:08	217.28	27.917	8.83333	28.541	32.021	1900-01-04 18:03:27	106	7.2
16:57:08	216.86	27.8678	8.91667	28.541	32.021	1900-01-04 19:03:27	107	6.5
17:02:08	216.752	27.8537	9	28.566	32.048	1900-01-04 20:03:27	108	6.1
17:07:08	215.836	27.7458	9.08333	28.566	31.995	1900-01-04 21:03:27	109	6
17:12:08	216.483	27.8232	9.16667	28.566	32.021	1900-01-04 22:03:27	110	5.9
17:17:08	215.89	27.7505	9.25	28.566	31.995	1900-01-04 23:03:27	111	5.9
17:22:08	216.698	27.8443	9.33333	28.591	32.048	1900-01-05 00:03:27	112	5.1
17:27:08	218.035	28.0039	9.41667	28.591	32.1	1900-01-05 01:03:27	113	4.6
17:32:08	218.283	28.0367	9.5	28.617	32.152	1900-01-05 02:03:27	114	4.3
17:37:08	218.573	28.0719	9.58333	28.667	32.178	1900-01-05 03:03:27	115	3.2
17:42:08	218.444	28.0578	9.66667	28.692	32.204	1900-01-05 04:03:27	116	2.8
17:47:08	218.045	28.0109	9.75	28.743	32.23	1900-01-05 05:03:27	117	2.5
17:52:08	218.336	28.0461	9.83333	28.768	32.283	1900-01-05 06:03:27	118	0.8
17:57:08	218.207	28.032	9.91667	28.793	32.283	1900-01-05 07:03:27	119	1.4
18:02:08	218.326	28.0461	10	28.818	32.309	1900-01-05 08:03:27	120	1.8
18:07:08	217.679	27.9663	10.0833	28.843	32.335	1900-01-05 09:03:27	121	2
18:12:08	217.151	27.9053	10.1667	28.843	32.335	1900-01-05 10:03:27	122	3.1
18:17:08	217.377	27.9311	10.25	28.869	32.361	1900-01-05 11:03:27	123	4.2
18:22:08	217.701	27.9663	10.3333	28.894	32.387	1900-01-05 12:03:27	124	4.2
18:27:08	218.369	28.0508	10.4167	28.894	32.414	1900-01-05 13:03:27	125	4.4
18:32:08	218.843	28.1094	10.5	28.919	32.44	1900-01-05 14:03:27	126	5
18:37:08	219.145	28.1376	10.5833	28.969	32.492	1900-01-05 15:03:27	127	6
18:42:08	218.983	28.1212	10.6667	28.995	32.519	1900-01-05 16:03:27	128	5.5
18:47:08	219.134	28.1446	10.75	29.02	32.545	1900-01-05 17:03:27	129	5
18:52:08	219.08	28.1376	10.8333	29.045	32.571	1900-01-05 18:03:27	130	4
18:57:08	219.145	28.147	10.9167	29.071	32.597	1900-01-05 19:03:27	131	3.8
19:02:08	219.026	28.1259	11	29.096	32.624	1900-01-05 20:03:27	132	3.7
19:07:08	219.015	28.1259	11.0833	29.121	32.65	1900-01-05 21:03:27	133	3.5
19:12:08	218.961	28.1165	11.1667	29.146	32.676	1900-01-05 22:03:27	134	3.8
19:17:08	219.231	28.154	11.25	29.146	32.676	1900-01-05 23:03:27	135	3.9
19:22:08	219.673	28.2033	11.3333	29.197	32.755	1900-01-06 00:03:27	136	3.3
19:27:08	219.727	28.2056	11.4167	29.222	32.781	1900-01-06 01:03:27	137	3.8
19:32:08	219.543	28.1892	11.5	29.248	32.781	1900-01-06 02:03:27	138	4
19:37:08	219.651	28.2009	11.5833	29.273	32.834	1900-01-06 03:03:27	139	3.8
19:42:08	219.608	28.1962	11.6667	29.298	32.86	1900-01-06 04:03:27	140	3.3
19:47:08	219.533	28.1869	11.75	29.324	32.887	1900-01-06 05:03:27	141	3.2
19:52:08	219.576	28.1916	11.8333	29.349	32.887	1900-01-06 06:03:27	142	2.9
19:57:08	219.468	28.1798	11.9167	29.349	32.913	1900-01-06 07:03:27	143	3.2
20:02:08	219.77	28.2127	12	29.374	32.94	1900-01-06 08:03:27	144	4.2
20:07:08	220.136	28.2596	12.0833	29.4	32.966	1900-01-06 09:03:27	145	4.7
20:12:08	219.834	28.2244	12.1667	29.425	32.992	1900-01-06 10:03:27	146	6.3
20:17:08	219.802	28.2174	12.25	29.476	33.019	1900-01-06 11:03:27	147	6.6
20:22:08	220.061	28.2408	12.3333	29.476	33.045	1900-01-06 12:03:27	148	8.6
20:27:08	220.104	28.2479	12.4167	29.501	33.072	1900-01-06 13:03:27	149	10
20:32:08	220.233	28.2666	12.5	29.526	33.072	1900-01-06 14:03:27	150	11
20:37:08	220.265	28.2713	12.5833	29.552	33.124	1900-01-06 15:03:27	151	11.8
20:42:08	220.276	28.2737	12.6667	29.552	33.124	1900-01-06 16:03:27	152	11.6
20:47:08	220.492	28.2971	12.75	29.577	33.151	1900-01-06 17:03:27	153	12.6
20:52:08	220.761	28.33	12.8333	29.603	33.177	1900-01-06 18:03:27	154	13.5
20:57:08	220.869	28.3464	12.9167	29.628	33.204	1900-01-06 19:03:27	155	14.5
21:02:08	220.502	28.2995	13	29.679	33.257	1900-01-06 20:03:27	156	14.5
21:07:08	218.11	28.0085	13.0833	29.679	33.177	1900-01-06 21:03:27	157	14.6
21:12:08	217.895	27.9851	13.1667	29.679	33.177	1900-01-06 22:03:27	158	14.6
21:17:08	218.142	28.0156	13.25	29.679	33.177	1900-01-06 23:03:27	159	13.9
21:22:08	218.132	28.0156	13.3333	29.653	33.177	1900-01-07 00:03:27	160	15.1
21:27:08	218.045	28.0039	13.4167	29.679	33.177	1900-01-07 01:03:27	161	14.7
21:32:08	217.981	27.9945	13.5	29.704	33.177	1900-01-07 02:03:27	162	13.7
21:37:08	218.239	28.0226	13.5833	29.679	33.177	1900-01-07 03:03:27	163	13.8
21:42:08	218.336	28.032	13.6667	29.704	33.204	1900-01-07 04:03:27	164	14
21:47:08	218.638	28.0672	13.75	29.679	33.204	1900-01-07 05:03:27	165	13.9
21:52:08	218.681	28.0742	13.8333	29.704	33.23	1900-01-07 06:03:27	166	14.1
21:57:08	218.326	28.0297	13.9167	29.73	33.23	1900-01-07 07:03:27	167	13.9
22:02:08	218.218	28.0156	14	29.73	33.257	1900-01-07 08:03:27	168	13.9
22:07:08	218.52	28.0531	14.0833	29.755	33.257	1900-01-07 09:03:27	169	13.9
22:12:08	218.358	28.032	14.1667	29.755	33.257	1900-01-07 10:03:27	170	14.7
22:17:08	218.703	28.0742	14.25	29.781	33.31	1900-01-07 11:03:27	171	13.9
22:22:08	218.832	28.086	14.3333	29.781	33.31	1900-01-07 12:03:27	172	14.4
22:27:08	218.821	28.086	14.4167	29.806	33.31	1900-01-07 13:03:27	173	14.9
22:32:08	218.886	28.093	14.5	29.831	33.336	1900-01-07 14:03:27	174	15.7
22:37:08	218.854	28.086	14.5833	29.831	33.363	1900-01-07 15:03:27	175	15.9
22:42:08	219.005	28.1071	14.6667	29.857	33.363	1900-01-07 16:03:27	176	16.6
22:47:08	219.091	28.1165	14.75	29.857	33.389	1900-01-07 17:03:27	177	16.8
22:52:08	219.328	28.1446	14.8333	29.882	33.416	1900-01-07 18:03:27	178	16.7
22:57:08	218.897	28.0954	14.9167	29.882	33.416	1900-01-07 19:03:27	179	14.5
23:02:08	218.864	28.093	15	29.933	33.442	1900-01-07 20:03:27	180	12.9
23:07:08	218.746	28.0766	15.0833	29.933	33.442	1900-01-07 21:03:27	181	12.6
23:12:08	219.037	28.1094	15.1667	29.933	33.469	1900-01-07 22:03:27	182	12.3
23:17:08	219.22	28.1352	15.25	29.933	33.469	1900-01-07 23:03:27	183	10
23:22:08	219.36	28.1517	15.3333	29.984	33.522	1900-01-08 00:03:27	184	7.7
23:27:08	219.511	28.1704	15.4167	29.984	33.522	1900-01-08 01:03:27	185	7.7
23:32:08	219.565	28.1728	15.5	30.01	33.549	1900-01-08 02:03:27	186	7
23:37:08	219.608	28.1751	15.5833	30.035	33.575	1900-01-08 03:03:27	187	6.6
23:42:08	219.403	28.1564	15.6667	30.061	33.575	1900-01-08 04:03:27	188	6.1
23:47:08	219.727	28.1916	15.75	30.061	33.602	1900-01-08 05:03:27	189	6
23:52:08	219.996	28.2267	15.8333	30.061	33.602	1900-01-08 06:03:27	190	5.9
23:57:08	220.104	28.2361	15.9167	30.086	33.655	1900-01-08 07:03:27	191	5.9
00:02:08	220.298	28.2526	16	30.112	33.682	1900-01-08 08:03:27	192	5.9
00:07:08	220.47	28.2784	16.0833	30.137	33.708
00:12:08	220.739	28.3089	16.1667	30.163	33.735
00:17:08	220.933	28.3276	16.25	30.163	33.735
00:22:08	220.912	28.3253	16.3333	30.214	33.788
00:27:08	219.942	28.215	16.4167	30.24	33.788
00:32:08	218.444	28.032	16.5	30.24	33.762
00:37:08	218.649	28.0555	16.5833	30.24	33.762
00:42:08	218.563	28.0437	16.6667	30.24	33.762
00:47:08	218.811	28.0742	16.75	30.24	33.762
00:52:08	218.757	28.0742	16.8333	30.214	33.735
00:57:08	219.069	28.1118	16.9167	30.24	33.762
01:02:08	219.015	28.1024	17	30.265	33.788
01:07:08	218.358	28.0226	17.0833	30.265	33.762
01:12:08	218.132	27.9945	17.1667	30.265	33.762
01:17:08	218.25	28.0085	17.25	30.265	33.762
01:22:08	218.239	28.0062	17.3333	30.265	33.762
01:27:08	218.186	27.9968	17.4167	30.265	33.762
01:32:08	218.175	27.9968	17.5	30.291	33.788
01:37:08	217.884	27.9616	17.5833	30.291	33.788
01:42:08	218.293	28.0132	17.6667	30.291	33.788
01:47:08	218.66	28.0578	17.75	30.291	33.788
01:52:08	218.681	28.0578	17.8333	30.291	33.815
01:57:08	218.983	28.093	17.9167	30.316	33.842
02:02:08	218.573	28.0414	18	30.342	33.842
02:07:08	217.927	27.964	18.0833	30.342	33.842
02:12:08	217.959	27.9663	18.1667	30.342	33.842
02:17:08	217.873	27.9569	18.25	30.342	33.842
02:22:08	217.905	27.9593	18.3333	30.342	33.842
02:27:08	217.776	27.9452	18.4167	30.368	33.842
02:32:08	217.819	27.9499	18.5	30.368	33.868
02:37:08	217.841	27.9546	18.5833	30.368	33.868
02:42:08	217.711	27.9335	18.6667	30.368	33.868
02:47:08	218.358	28.0156	18.75	30.393	33.895
02:52:08	219.026	28.0954	18.8333	30.393	33.922
02:57:08	218.918	28.0789	18.9167	30.419	33.922
03:02:08	218.347	28.0109	19	30.444	33.948
03:07:08	217.765	27.9452	19.0833	30.444	33.948
03:12:08	217.571	27.9217	19.1667	30.444	33.922
03:17:08	217.507	27.9147	19.25	30.444	33.922
03:22:08	217.065	27.8607	19.3333	30.444	33.922
03:27:08	217.851	27.9546	19.4167	30.444	33.948
03:32:08	217.701	27.9358	19.5	30.444	33.922
03:37:08	217.658	27.9288	19.5833	30.47	33.948
03:42:08	217.754	27.9405	19.6667	30.47	33.975
03:47:08	217.862	27.9546	19.75	30.47	33.948
03:52:08	218.142	27.9898	19.8333	30.496	34.002
03:57:08	218.153	27.9898	19.9167	30.496	34.002
04:02:08	217.938	27.9616	20	30.496	34.002
04:07:08	217.927	27.9593	20.0833	30.521	34.002
04:12:08	218.304	28.0039	20.1667	30.521	34.029
04:17:08	218.52	28.032	20.25	30.547	34.055
04:22:08	218.433	28.0203	20.3333	30.547	34.055
04:27:08	218.293	28.0039	20.4167	30.573	34.055
04:32:08	217.938	27.9593	20.5	30.573	34.055
04:37:08	217.938	27.9616	20.5833	30.573	34.055
04:42:08	218.196	27.9945	20.6667	30.573	34.082
04:47:08	218.466	28.025	20.75	30.598	34.109
04:52:08	218.735	28.0555	20.8333	30.598	34.109
04:57:08	218.035	27.971	20.9167	30.624	34.136
05:02:08	217.69	27.9311	21	30.624	34.109
05:07:08	218.11	27.978	21.0833	30.624	34.136
05:12:08	218.369	28.0085	21.1667	30.624	34.136
05:17:08	218.272	27.9921	21.25	30.675	34.162
05:22:08	218.045	27.9663	21.3333	30.675	34.162
05:27:08	217.938	27.9569	21.4167	30.675	34.162
05:32:08	217.97	27.9593	21.5	30.675	34.162
05:37:08	217.862	27.9429	21.5833	30.675	34.162
05:42:08	216.817	27.8185	21.6667	30.701	34.162
05:47:08	216.925	27.8326	21.75	30.675	34.136
05:52:08	216.828	27.8185	21.8333	30.675	34.136
05:57:08	216.591	27.7927	21.9167	30.675	34.136
06:02:08	216.16	27.7434	22	30.675	34.109
06:07:08	215.384	27.6684	22.0833	30.675	34.082
06:12:08	215.47	27.6543	22.1667	30.65	34.082
06:17:08	215.438	27.6519	22.25	30.675	34.082
06:22:08	216.515	27.7763	22.3333	30.624	34.082
06:27:08	216.537	27.7857	22.4167	30.624	34.082
06:32:08	216.461	27.7716	22.5	30.65	34.109
06:37:08	216.203	27.7458	22.5833	30.65	34.082
06:42:08	216.343	27.7622	22.6667	30.65	34.109
06:47:08	216.224	27.7481	22.75	30.65	34.109
06:52:08	216.009	27.7223	22.8333	30.65	34.082
06:57:08	215.233	27.6285	22.9167	30.675	34.082
07:02:08	215.093	27.6144	23	30.65	34.055
07:07:08	215.642	27.6754	23.0833	30.65	34.055
07:12:08	216.213	27.7481	23.1667	30.65	34.082
07:17:08	216.084	27.7223	23.25	30.65	34.109
07:22:08	215.966	27.7153	23.3333	30.65	34.082
07:27:08	214.963	27.5956	23.4167	30.675	34.082
07:32:08	215.567	27.6684	23.5	30.675	34.082
07:37:08	216.073	27.7294	23.5833	30.675	34.109
07:42:08	215.923	27.7082	23.6667	30.675	34.109
07:47:08	216.02	27.7223	23.75	30.675	34.109
07:52:08	215.373	27.6449	23.8333	30.675	34.109
07:57:08	214.899	27.5886	23.9167	30.701	34.109
08:02:08	215.351	27.6402	24	30.675	34.109
08:07:08	215.276	27.6285	24.0833	30.675	34.109
08:12:08	214.694	27.5604	24.1667	30.675	34.082
08:17:08	214.425	27.5276	24.25	30.675	34.082
08:22:08	214.856	27.5839	24.3333	30.675	34.082
08:27:08	215.384	27.6449	24.4167	30.675	34.082
08:32:08	215.298	27.6379	24.5	30.675	34.109
08:37:08	215.114	27.6097	24.5833	30.701	34.109
08:42:08	215.147	27.6191	24.6667	30.675	34.082
08:47:08	215.384	27.6449	24.75	30.701	34.109
08:52:08	215.082	27.605	24.8333	30.701	34.136
08:57:08	214.899	27.5792	24.9167	30.727	34.109
09:02:08	215.114	27.612	25	30.701	34.109
09:07:08	215.114	27.6097	25.0833	30.727	34.136
09:12:08	215.168	27.6144	25.1667	30.727	34.109
09:17:08	217.668	27.917	25.25	30.727	34.189
09:22:08	217.798	27.9311	25.3333	30.753	34.216
09:27:08	217.701	27.9217	25.4167	30.778	34.27
09:32:08	217.647	27.9147	25.5	30.804	34.27
09:37:08	217.668	27.9124	25.5833	30.83	34.297
09:42:08	217.981	27.9522	25.6667	30.855	34.35
09:47:08	217.851	27.9335	25.75	30.881	34.35
09:52:08	217.744	27.9264	25.8333	30.907	34.377
09:57:08	217.647	27.9124	25.9167	30.907	34.377
10:02:08	217.938	27.9382	26	30.933	34.404
10:07:08	217.905	27.9382	26.0833	30.933	34.431
10:12:08	217.948	27.9452	26.1667	30.958	34.431
10:17:08	218.045	27.9569	26.25	30.984	34.458
10:22:08	217.41	27.8819	26.3333	30.984	34.458
10:27:08	217.27	27.8631	26.4167	31.01	34.485
10:32:08	217.938	27.9452	26.5	31.01	34.485
10:37:08	217.83	27.9288	26.5833	31.01	34.485
10:42:08	217.647	27.9077	26.6667	31.036	34.512
10:47:08	217.701	27.9147	26.75	31.036	34.512
10:52:08	217.658	27.91	26.8333	31.036	34.512
10:57:08	217.744	27.9217	26.9167	31.062	34.539
11:02:08	217.571	27.9006	27	31.062	34.539
11:07:08	217.528	27.8936	27.0833	31.087	34.565
11:12:08	217.431	27.8795	27.1667	31.062	34.539
11:17:08	217.916	27.9358	27.25	31.087	34.592
11:22:08	218.239	27.9757	27.3333	31.113	34.592
11:27:08	218.024	27.9475	27.4167	31.113	34.592
11:32:08	217.927	27.9358	27.5	31.113	34.592
11:37:08	218.024	27.9499	27.5833	31.139	34.619
11:42:08	218.336	27.9898	27.6667	31.139	34.619
11:47:08	218.067	27.9569	27.75	31.165	34.646
11:52:08	217.981	27.9475	27.8333	31.165	34.673
11:57:08	218.142	27.964	27.9167	31.165	34.673
12:02:08	217.916	27.9358	28	31.191	34.673
12:07:08	218.358	27.9874	28.0833	31.191	34.673
12:12:08	218.261	27.9734	28.1667	31.217	34.7
12:17:08	218.412	27.9851	28.25	31.217	34.7
12:22:08	218.39	27.9851	28.3333	31.217	34.727
12:27:08	218.186	27.9593	28.4167	31.242	34.727
12:32:08	218.358	27.9827	28.5	31.242	34.727
12:37:08	218.132	27.9522	28.5833	31.242	34.727
12:42:08	218.078	27.9452	28.6667	31.242	34.727
12:47:08	218.175	27.9593	28.75	31.268	34.754
12:52:08	218.196	27.9593	28.8333	31.268	34.754
12:57:08	218.617	28.0085	28.9167	31.268	34.781
13:02:08	218.52	28.0039	29	31.294	34.781
13:07:08	219.069	28.0696	29.0833	31.294	34.835
13:12:08	218.951	28.0578	29.1667	31.294	34.808
13:17:08	218.767	28.0344	29.25	31.32	34.835
13:22:08	218.38	27.9874	29.3333	31.346	34.835
13:27:08	218.466	27.9968	29.4167	31.346	34.835
13:32:08	218.39	27.9898	29.5	31.346	34.835
13:37:08	218.649	28.0179	29.5833	31.346	34.862
13:42:08	218.638	28.0226	29.6667	31.346	34.862
13:47:08	218.767	28.0391	29.75	31.346	34.862
13:52:08	218.961	28.0602	29.8333	31.372	34.889
13:57:08	219.468	28.1235	29.9167	31.372	34.917
14:02:08	219.22	28.0907	30	31.398	34.917
14:07:08	218.994	28.0602	30.0833	31.424	34.944
14:12:08	218.875	28.0484	30.1667	31.424	34.944
14:17:08	219.274	28.0954	30.25	31.449	34.971
14:22:08	219.662	28.1423	30.3333	31.449	34.971
14:27:08	219.716	28.147	30.4167	31.475	34.998
14:32:08	219.845	28.1657	30.5	31.475	34.998
14:37:08	219.608	28.1399	30.5833	31.501	35.025
14:42:08	219.683	28.1423	30.6667	31.527	35.052
14:47:08	219.576	28.1329	30.75	31.501	35.025
14:52:08	219.856	28.1634	30.8333	31.553	35.079
14:57:08	219.748	28.154	30.9167	31.527	35.052
15:02:08	219.824	28.1634	31	31.553	35.079
15:07:08	220.028	28.1892	31.0833	31.553	35.106
15:12:08	220.427	28.2361	31.1667	31.579	35.133
15:17:08	220.546	28.2479	31.25	31.579	35.161
15:22:08	220.589	28.2549	31.3333	31.605	35.161
15:27:08	220.481	28.2385	31.4167	31.631	35.188
15:32:08	220.395	28.2385	31.5	31.631	35.188
15:37:08	219.899	28.1751	31.5833	31.657	35.188
15:42:08	220.082	28.1939	31.6667	31.657	35.215
15:47:08	220.233	28.208	31.75	31.657	35.215
15:52:08	219.877	28.1704	31.8333	31.657	35.215
15:57:08	219.856	28.1634	31.9167	31.683	35.215
16:02:08	220.352	28.2267	32	31.683	35.242
16:07:08	220.686	28.2666	32.0833	31.683	35.242
16:12:08	220.578	28.2479	32.1667	31.709	35.269
16:17:08	220.405	28.2267	32.25	31.709	35.269
16:22:08	220.492	28.2408	32.3333	31.735	35.269
16:27:08	220.567	28.2502	32.4167	31.735	35.296
16:32:08	220.718	28.2666	32.5	31.761	35.296
16:37:08	220.567	28.2502	32.5833	31.761	35.324
16:42:08	220.19	28.208	32.6667	31.761	35.296
16:47:08	219.964	28.1728	32.75	31.787	35.324
16:52:08	219.64	28.1376	32.8333	31.787	35.296
16:57:08	219.102	28.0742	32.9167	31.787	35.296
17:02:08	218.132	27.9616	33	31.761	35.269
17:07:08	218.078	27.9616	33.0833	31.761	35.215
17:12:08	219.371	28.1094	33.1667	31.735	35.269
17:17:08	219.349	28.1024	33.25	31.735	35.242
17:22:08	219.22	28.086	33.3333	31.761	35.269
17:27:08	219.134	28.0766	33.4167	31.761	35.269
17:32:08	218.886	28.0508	33.5	31.761	35.269
17:37:08	218.951	28.0578	33.5833	31.761	35.269
17:42:08	219.091	28.0742	33.6667	31.761	35.296
17:47:08	218.951	28.0555	33.75	31.761	35.269
17:52:08	219.295	28.1001	33.8333	31.761	35.296
17:57:08	219.295	28.0977	33.9167	31.787	35.296
18:02:08	219.328	28.1047	34	31.787	35.296
18:07:08	219.199	28.0883	34.0833	31.787	35.324
18:12:08	219.425	28.1165	34.1667	31.787	35.296
18:17:08	219.285	28.0977	34.25	31.813	35.324
18:22:08	219.166	28.086	34.3333	31.813	35.324
18:27:08	219.188	28.086	34.4167	31.813	35.324
18:32:08	219.252	28.0907	34.5	31.813	35.324
18:37:08	219.231	28.0883	34.5833	31.813	35.351
18:42:08	219.102	28.0719	34.6667	31.839	35.351
18:47:08	219.102	28.0696	34.75	31.839	35.351
18:52:08	219.231	28.0883	34.8333	31.839	35.351
18:57:08	219.576	28.1306	34.9167	31.839	35.351
19:02:08	219.662	28.1423	35	31.839	35.378
19:07:08	219.425	28.1165	35.0833	31.839	35.378
19:12:08	219.414	28.1118	35.1667	31.865	35.378
19:17:08	219.285	28.093	35.25	31.865	35.378
19:22:08	219.069	28.0696	35.3333	31.865	35.378
19:27:08	219.22	28.0883	35.4167	31.865	35.378
19:32:08	219.457	28.1165	35.5	31.865	35.405
19:37:08	219.403	28.1118	35.5833	31.891	35.405
19:42:08	219.522	28.1235	35.6667	31.891	35.405
19:47:08	219.802	28.1587	35.75	31.891	35.405
19:52:08	220.211	28.208	35.8333	31.891	35.46
19:57:08	220.05	28.1892	35.9167	31.917	35.46
20:02:08	220.556	28.2479	36	31.943	35.487
20:07:08	219.586	28.1306	36.0833	31.943	35.46
20:12:08	218.918	28.0531	36.1667	31.943	35.46
20:17:08	219.069	28.0719	36.25	31.943	35.46
20:22:08	218.983	28.0625	36.3333	31.943	35.46
20:27:08	218.961	28.0578	36.4167	31.943	35.46
20:32:08	219.08	28.0696	36.5	31.943	35.46
20:37:08	219.339	28.1024	36.5833	31.943	35.46
20:42:08	219.716	28.147	36.6667	31.943	35.487
20:47:08	219.468	28.1188	36.75	31.943	35.46
20:52:08	219.554	28.1329	36.8333	31.969	35.487
20:57:08	219.974	28.1845	36.9167	31.969	35.515
21:02:08	219.727	28.1517	37	31.995	35.515
21:07:08	219.64	28.1446	37.0833	31.995	35.515
21:12:08	219.694	28.1493	37.1667	31.995	35.515
21:17:08	219.64	28.147	37.25	31.995	35.542
21:22:08	219.802	28.1587	37.3333	32.021	35.542
21:27:08	219.921	28.1822	37.4167	32.021	35.542
21:32:08	220.082	28.1986	37.5	32.021	35.569
21:37:08	220.33	28.2314	37.5833	32.021	35.569
21:42:08	220.599	28.2596	37.6667	32.048	35.596
21:47:08	220.901	28.2971	37.75	32.074	35.624
21:52:08	220.632	28.2643	37.8333	32.074	35.624
21:57:08	220.362	28.2338	37.9167	32.1	35.651
22:02:08	220.492	28.2455	38	32.1	35.651
22:07:08	220.718	28.2737	38.0833	32.1	35.678
22:12:08	220.869	28.2924	38.1667	32.1	35.678
22:17:08	220.804	28.2831	38.25	32.126	35.678
22:22:08	218.692	28.0344	38.3333	32.152	35.651
22:27:08	218.789	28.0437	38.4167	32.126	35.624
22:32:08	218.433	28.0039	38.5	32.126	35.624
22:37:08	218.412	27.9992	38.5833	32.1	35.596
22:42:08	218.401	27.9945	38.6667	32.074	35.569
22:47:08	218.864	28.0531	38.75	32.1	35.596
22:52:08	218.875	28.0531	38.8333	32.074	35.596
22:57:08	218.821	28.0461	38.9167	32.074	35.596
23:02:08	218.757	28.0367	39	32.074	35.569
23:07:08	218.649	28.0203	39.0833	32.074	35.569
23:12:08	218.476	28.0039	39.1667	32.074	35.569
23:17:08	218.961	28.0649	39.25	32.074	35.569
23:22:08	219.339	28.1047	39.3333	32.074	35.596
23:27:08	219.522	28.1282	39.4167	32.1	35.624
23:32:08	219.759	28.154	39.5	32.1	35.624
23:37:08	219.802	28.1587	39.5833	32.126	35.651
23:42:08	219.285	28.093	39.6667	32.126	35.624
23:47:08	219.845	28.1611	39.75	32.126	35.651
23:52:08	220.244	28.2103	39.8333	32.126	35.678
23:57:08	220.427	28.2338	39.9167	32.152	35.706
00:02:08	220.653	28.2619	40	32.178	35.733
00:07:08	220.438	28.2408	40.0833	32.178	35.706
00:12:08	220.567	28.2572	40.1667	32.178	35.733
00:17:08	220.395	28.2338	40.25	32.204	35.761
00:22:08	220.33	28.2267	40.3333	32.204	35.761
00:27:08	220.179	28.208	40.4167	32.23	35.761
00:32:08	220.255	28.215	40.5	32.23	35.761
00:37:08	220.168	28.1986	40.5833	32.23	35.761
00:42:08	220.535	28.2455	40.6667	32.23	35.788
00:47:08	220.847	28.2831	40.75	32.23	35.788
00:52:08	220.977	28.3018	40.8333	32.257	35.815
00:57:08	221.181	28.3229	40.9167	32.283	35.843
01:02:08	218.304	27.978	41	32.283	35.761
01:07:08	218.423	27.9898	41.0833	32.283	35.761
01:12:08	218.487	27.9968	41.1667	32.23	35.733
01:17:08	218.714	28.0226	41.25	32.23	35.733
01:22:08	218.757	28.032	41.3333	32.23	35.733
01:27:08	218.767	28.032	41.4167	32.23	35.733
01:32:08	218.735	28.025	41.5	32.204	35.706
01:37:08	218.541	28.0015	41.5833	32.23	35.706
01:42:08	218.94	28.0508	41.6667	32.204	35.733
01:47:08	218.778	28.032	41.75	32.204	35.706
01:52:08	219.188	28.0813	41.8333	32.204	35.733
01:57:08	219.252	28.093	41.9167	32.204	35.733
02:02:08	219.22	28.086	42	32.204	35.733
02:07:08	219.306	28.0954	42.0833	32.23	35.733
02:12:08	219.457	28.1141	42.1667	32.23	35.761
02:17:08	219.231	28.0883	42.25	32.23	35.733
02:22:08	219.123	28.0719	42.3333	32.257	35.761
02:27:08	219.414	28.1071	42.4167	32.257	35.761
02:32:08	219.166	28.0789	42.5	32.257	35.761
02:37:08	219.22	28.0836	42.5833	32.257	35.761
02:42:08	219.166	28.0789	42.6667	32.257	35.761
02:47:08	219.328	28.1001	42.75	32.257	35.761
02:52:08	219.145	28.0766	42.8333	32.257	35.788
02:57:08	219.285	28.0977	42.9167	32.257	35.761
03:02:08	219.263	28.0907	43	32.283	35.788
03:07:08	219.102	28.0696	43.0833	32.283	35.788
03:12:08	219.22	28.0813	43.1667	32.283	35.788
03:17:08	219.328	28.0954	43.25	32.283	35.788
03:22:08	219.199	28.0836	43.3333	32.283	35.788
03:27:08	219.166	28.0766	43.4167	32.283	35.788
03:32:08	219.285	28.0907	43.5	32.283	35.788
03:37:08	219.242	28.0907	43.5833	32.309	35.815
03:42:08	219.306	28.0954	43.6667	32.309	35.815
03:47:08	219.425	28.1094	43.75	32.309	35.815
03:52:08	219.608	28.1306	43.8333	32.309	35.843
03:57:08	219.468	28.1141	43.9167	32.309	35.843
04:02:08	219.5	28.1141	44	32.335	35.843
04:07:08	219.392	28.1047	44.0833	32.335	35.843
04:12:08	219.457	28.1118	44.1667	32.335	35.843
04:17:08	219.511	28.1188	44.25	32.335	35.87
04:22:08	219.651	28.1399	44.3333	32.335	35.87
04:27:08	219.791	28.154	44.4167	32.335	35.87
04:32:08	219.802	28.1517	44.5	32.361	35.87
04:37:08	219.683	28.1399	44.5833	32.361	35.87
04:42:08	219.651	28.1376	44.6667	32.361	35.898
04:47:08	219.64	28.1352	44.75	32.361	35.898
04:52:08	219.834	28.1587	44.8333	32.387	35.898
04:57:08	219.791	28.1517	44.9167	32.387	35.898
05:02:08	219.619	28.1329	45	32.387	35.925
05:07:08	219.748	28.147	45.0833	32.387	35.925
05:12:08	219.824	28.1564	45.1667	32.414	35.925
05:17:08	219.78	28.1517	45.25	32.414	35.925
05:22:08	220.082	28.1845	45.3333	32.414	35.925
05:27:08	220.05	28.1798	45.4167	32.414	35.953
05:32:08	220.19	28.1986	45.5	32.44	35.953
05:37:08	219.996	28.1728	45.5833	32.44	35.953
05:42:08	219.899	28.1634	45.6667	32.44	35.953
05:47:08	219.824	28.154	45.75	32.44	35.98
05:52:08	219.78	28.147	45.8333	32.466	35.98
05:57:08	219.349	28.0954	45.9167	32.44	35.953
06:02:08	219.188	28.0813	46	32.44	35.953
06:07:08	219.188	28.0766	46.0833	32.44	35.953
06:12:08	219.263	28.0836	46.1667	32.44	35.953
06:17:08	219.134	28.0719	46.25	32.44	35.953
06:22:08	219.683	28.1352	46.3333	32.44	35.953
06:27:08	220.416	28.2267	46.4167	32.414	35.98
06:32:08	220.47	28.2338	46.5	32.44	35.98
06:37:08	220.567	28.2455	46.5833	32.466	36.008
06:42:08	220.502	28.2361	46.6667	32.466	36.035
06:47:08	220.222	28.2009	46.75	32.492	36.035
06:52:08	220.039	28.1845	46.8333	32.492	36.035
06:57:08	219.888	28.1657	46.9167	32.492	36.035
07:02:08	219.921	28.1657	47	32.492	36.008
07:07:08	219.716	28.1423	47.0833	32.492	36.008
07:12:08	219.91	28.1634	47.1667	32.519	36.063
07:17:08	219.705	28.1423	47.25	32.492	36.035
07:22:08	219.392	28.1024	47.3333	32.492	36.035
07:27:08	218.854	28.0414	47.4167	32.492	36.008
07:32:08	218.811	28.0344	47.5	32.492	36.008
07:37:08	218.94	28.0461	47.5833	32.492	36.008
07:42:08	218.908	28.0437	47.6667	32.492	35.98
07:47:08	218.886	28.0437	47.75	32.492	36.008
07:52:08	218.714	28.0203	47.8333	32.492	35.98
07:57:08	218.186	27.9569	47.9167	32.466	35.953
08:02:08	217.905	27.9241	48	32.466	35.953
08:07:08	218.002	27.9358	48.0833	32.466	35.953
08:12:08	215.772	27.666	48.1667	32.466	35.87
08:17:08	216.709	27.7786	48.25	32.414	35.87
08:22:08	217.237	27.8396	48.3333	32.387	35.843
08:27:08	217.42	27.8631	48.4167	32.414	35.87
08:32:08	217.27	27.8443	48.5	32.387	35.843
08:37:08	217.162	27.8349	48.5833	32.387	35.843
08:42:08	217.248	27.8373	48.6667	32.387	35.843
08:47:08	216.752	27.7833	48.75	32.387	35.815
08:52:08	216.989	27.8138	48.8333	32.387	35.843
08:57:08	216.968	27.8138	48.9167	32.361	35.815
09:02:08	217.032	27.8068	49	32.361	35.815
09:07:08	216.968	27.8068	49.0833	32.361	35.815
09:12:08	216.709	27.7763	49.1667	32.361	35.815
09:17:08	217.022	27.8209	49.25	32.361	35.788
09:22:08	217.302	27.8537	49.3333	32.361	35.815
09:27:08	216.828	27.795	49.4167	32.361	35.788
09:32:08	216.763	27.7857	49.5	32.361	35.788
09:37:08	216.709	27.7833	49.5833	32.361	35.788
09:42:08	216.58	27.7669	49.6667	32.361	35.788
09:47:08	216.752	27.7833	49.75	32.361	35.788
09:52:08	216.58	27.7669	49.8333	32.361	35.788
09:57:08	216.526	27.7552	49.9167	32.361	35.788
10:02:08	216.612	27.7622	50	32.361	35.788
10:07:08	216.548	27.7552	50.0833	32.335	35.788
10:12:08	216.634	27.7645	50.1667	32.335	35.788
10:17:08	216.494	27.7528	50.25	32.361	35.788
10:22:08	216.515	27.7481	50.3333	32.361	35.788
10:27:08	216.461	27.7458	50.4167	32.361	35.788
10:32:08	216.364	27.734	50.5	32.361	35.788
10:37:08	216.257	27.7247	50.5833	32.361	35.788
10:42:08	218.994	28.0555	50.6667	32.361	35.843
10:47:08	218.94	28.0367	50.75	32.361	35.843
10:52:08	218.8	28.025	50.8333	32.414	35.898
10:57:08	219.112	28.0625	50.9167	32.414	35.925
11:02:08	218.67	28.0109	51	32.44	35.953
11:07:08	218.433	27.9827	51.0833	32.466	35.953
11:12:08	218.315	27.971	51.1667	32.466	35.953
11:17:08	218.412	27.9804	51.25	32.492	35.98
11:22:08	218.52	27.9945	51.3333	32.492	35.98
11:27:08	218.433	27.9827	51.4167	32.492	35.98
11:32:08	218.444	27.9874	51.5	32.492	35.953
11:37:08	218.53	27.9921	51.5833	32.519	36.008
11:42:08	218.617	28.0015	51.6667	32.519	36.008
11:47:08	218.961	28.0461	51.75	32.519	36.008
11:52:08	218.509	27.9921	51.8333	32.519	35.98
11:57:08	218.66	28.0039	51.9167	32.545	36.035
12:02:08	218.487	27.9874	52	32.545	36.035
12:07:08	218.412	27.978	52.0833	32.545	36.035
12:12:08	218.875	28.0344	52.1667	32.545	36.035
12:17:08	219.134	28.0625	52.25	32.571	36.063
12:22:08	219.177	28.0672	52.3333	32.571	36.063
12:27:08	219.177	28.0696	52.4167	32.571	36.09
12:32:08	219.199	28.0742	52.5	32.571	36.063
12:37:08	219.371	28.093	52.5833	32.571	36.09
12:42:08	219.392	28.093	52.6667	32.624	36.145
12:47:08	219.177	28.0649	52.75	32.624	36.118
12:52:08	219.263	28.0766	52.8333	32.624	36.118
12:57:08	219.414	28.093	52.9167	32.624	36.145
13:02:08	219.274	28.0789	53	32.65	36.145
13:07:08	219.457	28.0977	53.0833	32.65	36.145
13:12:08	219.414	28.0954	53.1667	32.65	36.173
13:17:08	219.436	28.0977	53.25	32.676	36.173
13:22:08	219.791	28.1376	53.3333	32.676	36.2
13:27:08	219.716	28.1306	53.4167	32.676	36.2
13:32:08	219.177	28.0649	53.5	32.702	36.2
13:37:08	219.533	28.1047	53.5833	32.702	36.2
13:42:08	219.662	28.1259	53.6667	32.702	36.2
13:47:08	219.716	28.1282	53.75	32.702	36.228
13:52:08	220.007	28.1634	53.8333	32.729	36.228
13:57:08	219.791	28.1376	53.9167	32.729	36.255
14:02:08	219.468	28.0977	54	32.729	36.255
14:07:08	219.586	28.1118	54.0833	32.755	36.255
14:12:08	219.921	28.1517	54.1667	32.755	36.255
14:17:08	220.211	28.1845	54.25	32.755	36.283
14:22:08	220.265	28.1962	54.3333	32.755	36.283
14:27:08	219.727	28.1306	54.4167	32.781	36.283
14:32:08	220.028	28.1634	54.5	32.781	36.311
14:37:08	219.931	28.1517	54.5833	32.781	36.311
14:42:08	220.071	28.1657	54.6667	32.781	36.311
14:47:08	220.05	28.1681	54.75	32.781	36.311
14:52:08	220.308	28.1962	54.8333	32.781	36.338
14:57:08	220.416	28.2056	54.9167	32.808	36.338
15:02:08	220.75	28.2455	55	32.834	36.366
15:07:08	220.869	28.2619	55.0833	32.834	36.393
15:12:08	220.815	28.2549	55.1667	32.834	36.366
15:17:08	220.88	28.2619	55.25	32.86	36.393
15:22:08	221.117	28.2901	55.3333	32.86	36.421
15:27:08	219.058	28.0437	55.4167	32.86	36.366
15:32:08	218.433	27.971	55.5	32.887	36.366
15:37:08	218.369	27.9616	55.5833	32.86	36.338
15:42:08	218.401	27.9616	55.6667	32.86	36.311
15:47:08	218.164	27.9358	55.75	32.834	36.311
15:52:08	218.423	27.9687	55.8333	32.808	36.283
15:57:08	218.229	27.9475	55.9167	32.808	36.283
16:02:08	218.412	27.971	56	32.808	36.283
16:07:08	218.681	28.0015	56.0833	32.808	36.283
16:12:08	218.595	27.9898	56.1667	32.808	36.283
16:17:08	218.638	27.9945	56.25	32.808	36.283
16:22:08	218.369	27.964	56.3333	32.808	36.283
16:27:08	218.293	27.9546	56.4167	32.808	36.283
16:32:08	218.035	27.9217	56.5	32.808	36.255
16:37:08	217.884	27.9077	56.5833	32.781	36.255
16:42:08	217.916	27.9077	56.6667	32.781	36.255
16:47:08	217.776	27.8936	56.75	32.781	36.255
16:52:08	217.464	27.8467	56.8333	32.781	36.228
16:57:08	216.957	27.7904	56.9167	32.781	36.2
17:02:08	216.483	27.7411	57	32.781	36.2
17:07:08	217.076	27.8138	57.0833	32.755	36.173
17:12:08	217	27.8021	57.1667	32.729	36.173
17:17:08	217.226	27.8279	57.25	32.729	36.173
17:22:08	217.237	27.8279	57.3333	32.729	36.173
17:27:08	217.14	27.8138	57.4167	32.729	36.173
17:32:08	217.216	27.8255	57.5	32.729	36.173
17:37:08	217.043	27.8044	57.5833	32.729	36.173
17:42:08	216.968	27.795	57.6667	32.729	36.173
17:47:08	216.839	27.7739	57.75	32.729	36.145
17:52:08	216.849	27.7739	57.8333	32.702	36.145
17:57:08	216.731	27.7645	57.9167	32.702	36.145
18:02:08	216.526	27.734	58	32.702	36.118
18:07:08	216.72	27.7622	58.0833	32.702	36.118
18:12:08	216.785	27.7763	58.1667	32.702	36.118
18:17:08	216.72	27.7669	58.25	32.702	36.118
18:22:08	216.364	27.72	58.3333	32.676	36.118
18:27:08	216.052	27.6801	58.4167	32.702	36.118
18:32:08	218.272	27.9499	58.5	32.676	36.145
18:37:08	219.328	28.0719	58.5833	32.702	36.2
18:42:08	219.005	28.0367	58.6667	32.702	36.2
18:47:08	218.757	28.0085	58.75	32.729	36.2
18:52:08	218.703	28.0062	58.8333	32.755	36.228
18:57:08	218.918	28.0344	58.9167	32.755	36.255
19:02:08	218.972	28.0344	59	32.781	36.283
19:07:08	218.951	28.032	59.0833	32.781	36.283
19:12:08	218.854	28.0226	59.1667	32.808	36.283
19:17:08	219.069	28.0555	59.25	32.808	36.311
19:22:08	219.026	28.0461	59.3333	32.834	36.338
19:27:08	219.199	28.0649	59.4167	32.834	36.338
19:32:08	219.058	28.0484	59.5	32.834	36.338
19:37:08	219.005	28.0414	59.5833	32.86	36.366
19:42:08	218.972	28.0367	59.6667	32.86	36.338
19:47:08	219.274	28.0742	59.75	32.86	36.366
19:52:08	219.145	28.0578	59.8333	32.86	36.366
19:57:08	219.295	28.0789	59.9167	32.887	36.366
20:02:08	219.522	28.1047	60	32.887	36.393
20:07:08	219.694	28.1259	60.0833	32.887	36.421
20:12:08	220.039	28.1681	60.1667	32.913	36.421
20:17:08	219.931	28.1564	60.25	32.913	36.449
20:22:08	219.877	28.1493	60.3333	32.94	36.449
20:27:08	219.953	28.1587	60.4167	32.94	36.449
20:32:08	219.845	28.1446	60.5	32.94	36.476
20:37:08	219.845	28.147	60.5833	32.94	36.476
20:42:08	219.964	28.1587	60.6667	32.966	36.476
20:47:08	220.05	28.1681	60.75	32.966	36.476
20:52:08	220.168	28.1822	60.8333	32.992	36.504
20:57:08	220.352	28.208	60.9167	32.992	36.532
21:02:08	220.502	28.2244	61	32.992	36.532
21:07:08	220.287	28.1986	61.0833	32.992	36.532
21:12:08	220.179	28.1822	61.1667	33.019	36.532
21:17:08	220.352	28.2033	61.25	33.019	36.56
21:22:08	220.352	28.2009	61.3333	33.019	36.56
21:27:08	220.459	28.2127	61.4167	33.045	36.56
21:32:08	220.395	28.208	61.5	33.045	36.56
21:37:08	220.341	28.2033	61.5833	33.019	36.56
21:42:08	220.384	28.208	61.6667	33.072	36.587
21:47:08	220.524	28.2197	61.75	33.072	36.615
21:52:08	220.578	28.2314	61.8333	33.072	36.615
21:57:08	221.009	28.2831	61.9167	33.072	36.615
22:02:08	219.5	28.0977	62	33.072	36.587
22:07:08	218.703	27.9968	62.0833	33.098	36.587
22:12:08	218.961	28.0297	62.1667	33.072	36.56
22:17:08	218.961	28.0297	62.25	33.072	36.56
22:22:08	218.983	28.0367	62.3333	33.045	36.532
22:27:08	219.08	28.0461	62.4167	33.072	36.56
22:32:08	219.242	28.0625	62.5	33.045	36.56
22:37:08	219.026	28.0391	62.5833	33.045	36.532
22:42:08	219.252	28.0672	62.6667	33.045	36.532
22:47:08	219.457	28.086	62.75	33.045	36.56
22:52:08	219.802	28.1282	62.8333	33.045	36.56
22:57:08	220.599	28.2244	62.9167	33.045	36.587
23:02:08	220.395	28.2009	63	33.072	36.587
23:07:08	220.233	28.1822	63.0833	33.072	36.615
23:12:08	220.427	28.208	63.1667	33.098	36.615
23:17:08	220.761	28.2479	63.25	33.098	36.643
23:22:08	220.739	28.2455	63.3333	33.124	36.67
23:27:08	220.438	28.2127	63.4167	33.124	36.67
23:32:08	221.127	28.2948	63.5	33.124	36.67
23:37:08	221.16	28.2995	63.5833	33.124	36.698
23:42:08	219.716	28.1259	63.6667	33.151	36.67
23:47:08	218.638	27.9992	63.75	33.177	36.643
23:52:08	218.908	28.0344	63.8333	33.151	36.643
23:57:08	219.199	28.0696	63.9167	33.124	36.643
00:02:08	219.209	28.0696	64	33.124	36.615
00:07:08	219.177	28.0625	64.0833	33.124	36.615
00:12:08	219.102	28.0555	64.1667	33.124	36.615
00:17:08	219.209	28.0649	64.25	33.124	36.615
00:22:08	219.317	28.0789	64.3333	33.124	36.643
00:27:08	219.619	28.1188	64.4167	33.124	36.615
00:32:08	219.683	28.1259	64.5	33.124	36.615
00:37:08	219.586	28.1141	64.5833	33.124	36.643
00:42:08	219.705	28.1259	64.6667	33.124	36.643
00:47:08	219.619	28.1165	64.75	33.124	36.643
00:52:08	219.727	28.1282	64.8333	33.151	36.643
00:57:08	220.147	28.1775	64.9167	33.151	36.67
01:02:08	220.168	28.1822	65	33.151	36.67
01:07:08	220.265	28.1916	65.0833	33.151	36.643
01:12:08	220.405	28.208	65.1667	33.177	36.698
01:17:08	219.877	28.147	65.25	33.177	36.698
01:22:08	220.319	28.2009	65.3333	33.177	36.698
01:27:08	220.287	28.1962	65.4167	33.177	36.726
01:32:08	220.599	28.2338	65.5	33.177	36.726
01:37:08	220.481	28.2174	65.5833	33.204	36.754
01:42:08	220.405	28.2103	65.6667	33.204	36.754
01:47:08	220.33	28.2009	65.75	33.204	36.726
01:52:08	220.449	28.215	65.8333	33.23	36.754
01:57:08	220.276	28.1916	65.9167	33.23	36.754
02:02:08	220.211	28.1869	66	33.23	36.754
02:07:08	220.104	28.1704	66.0833	33.23	36.754
02:12:08	219.834	28.1423	66.1667	33.23	36.754
02:17:08	219.834	28.147	66.25	33.23	36.754
02:22:08	219.824	28.1423	66.3333	33.23	36.754
02:27:08	219.921	28.1493	66.4167	33.23	36.754
02:32:08	219.791	28.1352	66.5	33.23	36.754
02:37:08	219.759	28.1329	66.5833	33.23	36.754
02:42:08	220.007	28.1611	66.6667	33.23	36.754
02:47:08	219.996	28.1611	66.75	33.23	36.754
02:52:08	220.255	28.1916	66.8333	33.23	36.754
02:57:08	220.265	28.1939	66.9167	33.23	36.782
03:02:08	220.168	28.1798	67	33.257	36.782
03:07:08	219.985	28.1587	67.0833	33.257	36.782
03:12:08	219.845	28.1446	67.1667	33.257	36.782
03:17:08	220.007	28.1611	67.25	33.257	36.782
03:22:08	220.017	28.1587	67.3333	33.257	36.782
03:27:08	219.964	28.1564	67.4167	33.257	36.782
03:32:08	219.964	28.154	67.5	33.257	36.754
03:37:08	220.007	28.1611	67.5833	33.257	36.782
03:42:08	219.813	28.1376	67.6667	33.257	36.782
03:47:08	219.759	28.1282	67.75	33.283	36.782
03:52:08	219.824	28.1376	67.8333	33.283	36.782
03:57:08	219.78	28.1329	67.9167	33.283	36.782
04:02:08	219.683	28.1259	68	33.283	36.782
04:07:08	219.877	28.1446	68.0833	33.257	36.782
04:12:08	219.673	28.1188	68.1667	33.257	36.754
04:17:08	219.608	28.1141	68.25	33.283	36.782
04:22:08	219.662	28.1165	68.3333	33.283	36.782
04:27:08	219.651	28.1165	68.4167	33.283	36.782
04:32:08	219.813	28.1329	68.5	33.283	36.782
04:37:08	219.856	28.1352	68.5833	33.257	36.782
04:42:08	219.716	28.1235	68.6667	33.283	36.809
04:47:08	219.511	28.1024	68.75	33.283	36.782
04:52:08	219.63	28.1188	68.8333	33.283	36.782
04:57:08	219.522	28.0977	68.9167	33.283	36.782
05:02:08	219.306	28.0742	69	33.283	36.782
05:07:08	219.382	28.0836	69.0833	33.283	36.782
05:12:08	219.069	28.0414	69.1667	33.283	36.782
05:17:08	218.293	27.9522	69.25	33.283	36.754
05:22:08	218.002	27.9194	69.3333	33.283	36.754
05:27:08	217.862	27.903	69.4167	33.257	36.726
05:32:08	217.711	27.8842	69.5	33.23	36.698
05:37:08	217.959	27.9124	69.5833	33.23	36.698
05:42:08	217.604	27.8678	69.6667	33.23	36.67
05:47:08	217.226	27.8209	69.75	33.204	36.643
05:52:08	216.946	27.7857	69.8333	33.204	36.643
05:57:08	216.041	27.6754	69.9167	33.177	36.587
06:02:08	215.47	27.612	70	33.177	36.56
06:07:08	214.597	27.5018	70.0833	33.151	36.532
06:12:08	216.655	27.7528	70.1667	33.124	36.532
06:17:08	216.569	27.7387	70.25	33.072	36.504
06:22:08	217.119	27.8115	70.3333	33.098	36.532
06:27:08	218.175	27.9311	70.4167	33.098	36.56
06:32:08	217.959	27.91	70.5	33.124	36.587
06:37:08	217.679	27.8819	70.5833	33.124	36.587
06:42:08	217.614	27.8678	70.6667	33.124	36.587
06:47:08	217.722	27.8819	70.75	33.124	36.587
06:52:08	217.313	27.8373	70.8333	33.151	36.587
06:57:08	217.076	27.8044	70.9167	33.124	36.587
07:02:08	216.569	27.7481	71	33.124	36.56
07:07:08	215.222	27.5886	71.0833	33.124	36.532
07:12:08	215.233	27.5745	71.1667	33.124	36.532
07:17:08	215.869	27.6613	71.25	33.072	36.476
07:22:08	216.063	27.6801	71.3333	33.098	36.504
07:27:08	215.61	27.6261	71.4167	33.072	36.476
07:32:08	215.384	27.6003	71.5	33.045	36.449
07:37:08	214.974	27.5534	71.5833	33.045	36.421
07:42:08	214.737	27.5182	71.6667	33.045	36.421
07:47:08	214.78	27.5205	71.75	33.019	36.421
07:52:08	214.985	27.551	71.8333	33.019	36.393
07:57:08	215.114	27.1147	71.9167	32.992	36.366
08:02:08	217.086	27.8162	72	32.992	36.421
08:07:08	217.108	27.8138	72.0833	32.992	36.421
08:12:08	216.591	27.7505	72.1667	32.992	36.421
08:17:08	216.494	27.7387	72.25	33.019	36.449
08:22:08	216.246	27.7059	72.3333	33.019	36.449
08:27:08	215.772	27.6425	72.4167	33.019	36.449
08:32:08	215.211	27.5792	72.5	33.019	36.421
08:37:08	215.761	27.6707	72.5833	33.019	36.421
08:42:08	216.203	27.7082	72.6667	32.992	36.421
08:47:08	217.065	27.8091	72.75	33.019	36.449
08:52:08	217.032	27.795	72.8333	33.019	36.449
08:57:08	217.097	27.8044	72.9167	33.019	36.449
09:02:08	216.849	27.781	73	33.045	36.476
09:07:08	216.946	27.7857	73.0833	33.045	36.476
09:12:08	216.537	27.7387	73.1667	33.045	36.476
09:17:08	216.731	27.7692	73.25	33.045	36.476
09:22:08	216.548	27.7458	73.3333	33.045	36.476
09:27:08	216.612	27.7528	73.4167	33.072	36.476
09:32:08	216.817	27.781	73.5	33.045	36.476
09:37:08	216.774	27.7692	73.5833	33.072	36.504
09:42:08	216.839	27.7786	73.6667	33.072	36.504
09:47:08	216.623	27.7552	73.75	33.072	36.504
09:52:08	216.548	27.7481	73.8333	33.072	36.476
09:57:08	216.645	27.7575	73.9167	33.072	36.504
10:02:08	216.397	27.7247	74	33.072	36.504
10:07:08	216.44	27.734	74.0833	33.072	36.504
10:12:08	216.537	27.7458	74.1667	33.045	36.476
10:17:08	216.623	27.7481	74.25	33.072	36.504
10:22:08	216.117	27.6942	74.3333	33.045	36.476
10:27:08	216.278	27.7129	74.4167	33.072	36.476
10:32:08	217.323	27.8373	74.5	33.072	36.504
10:37:08	216.795	27.7716	74.5833	33.072	36.504
10:42:08	216.709	27.7622	74.6667	33.072	36.504
10:47:08	216.645	27.7575	74.75	33.072	36.504
10:52:08	216.375	27.7247	74.8333	33.072	36.504
10:57:08	216.688	27.7599	74.9167	33.098	36.532
11:02:08	216.181	27.6942	75	33.098	36.504
11:07:08	216.149	27.6965	75.0833	33.072	36.504
11:12:08	215.718	27.6402	75.1667	33.072	36.476
11:17:08	215.836	27.6519	75.25	33.072	36.476
11:22:08	215.933	27.6637	75.3333	33.072	36.476
11:27:08	216.03	27.6824	75.4167	33.072	36.504
11:32:08	216.127	27.6918	75.5	33.072	36.476
11:37:08	216.321	27.72	75.5833	33.045	36.476
11:42:08	216.375	27.7106	75.6667	33.072	36.504
11:47:08	215.351	27.5956	75.75	33.072	36.476
11:52:08	215.729	27.6355	75.8333	33.072	36.476
11:57:08	216.386	27.7247	75.9167	33.072	36.476
12:02:08	216.709	27.7692	76	33.045	36.476
12:07:08	216.192	27.7059	76.0833	33.072	36.476
12:12:08	216.407	27.7294	76.1667	33.072	36.504
12:17:08	216.44	27.734	76.25	33.072	36.504
12:22:08	216.494	27.7458	76.3333	33.072	36.504
12:27:08	216.451	27.734	76.4167	33.098	36.504
12:32:08	216.785	27.7763	76.5	33.098	36.504
12:37:08	216.914	27.7904	76.5833	33.098	36.504
12:42:08	216.407	27.7223	76.6667	33.098	36.532
12:47:08	216.483	27.7317	76.75	33.098	36.532
12:52:08	216.494	27.7411	76.8333	33.124	36.532
12:57:08	215.879	27.6637	76.9167	33.098	36.504
13:02:08	215.998	27.6824	77	33.098	36.504
13:07:08	215.416	27.605	77.0833	33.098	36.504
13:12:08	215.847	27.659	77.1667	33.098	36.504
13:17:08	215.836	27.6637	77.25	33.098	36.504
13:22:08	215.976	27.6848	77.3333	33.098	36.504
13:27:08	215.362	27.605	77.4167	33.098	36.476
13:32:08	214.608	27.5205	77.5	33.072	36.449
13:37:08	214.942	27.5159	77.5833	33.045	36.393
13:42:08	214.888	27.551	77.6667	33.045	36.421
13:47:08	215.384	27.6097	77.75	33.045	36.449
13:52:08	215.416	27.6167	77.8333	33.045	36.449
13:57:08	216.117	27.6989	77.9167	33.045	36.476
14:02:08	216.343	27.7247	78	33.045	36.476
14:07:08	216.02	27.6918	78.0833	33.045	36.476
14:12:08	216.418	27.7223	78.1667	33.072	36.504
14:17:08	216.181	27.7035	78.25	33.072	36.504
14:22:08	216.354	27.7223	78.3333	33.098	36.504
14:27:08	216.645	27.7622	78.4167	33.072	36.504
14:32:08	216.073	27.6942	78.5	33.098	36.532
14:37:08	216.504	27.7434	78.5833	33.098	36.532
14:42:08	216.537	27.7387	78.6667	33.098	36.532
14:47:08	216.946	27.795	78.75	33.098	36.532
14:52:08	217.054	27.7974	78.8333	33.124	36.56
14:57:08	217.065	27.8091	78.9167	33.124	36.587
15:02:08	216.558	27.7458	79	33.124	36.56
15:07:08	216.914	27.7857	79.0833	33.151	36.587
15:12:08	216.666	27.7599	79.1667	33.151	36.587
15:17:08	216.601	27.7458	79.25	33.151	36.587
15:22:08	216.968	27.795	79.3333	33.151	36.587
15:27:08	216.968	27.795	79.4167	33.151	36.587
15:32:08	217.076	27.7927	79.5	33.177	36.615
15:37:08	217.754	27.8889	79.5833	33.177	36.615
15:42:08	218.002	27.9194	79.6667	33.177	36.643
15:47:08	217.927	27.9077	79.75	33.204	36.643
15:52:08	217.658	27.8819	79.8333	33.204	36.643
15:57:08	217.905	27.91	79.9167	33.204	36.67
16:02:08	217.28	27.8302	80	33.23	36.67
16:07:08	217.205	27.8162	80.0833	33.23	36.67
16:12:08	217.895	27.903	80.1667	33.23	36.698
16:17:08	217.873	27.9006	80.25	33.23	36.698
16:22:08	217.895	27.91	80.3333	33.257	36.698
16:27:08	217.83	27.8959	80.4167	33.257	36.726
16:32:08	217.895	27.8983	80.5	33.257	36.726
16:37:08	217.754	27.8865	80.5833	33.283	36.726
16:42:08	215.524	27.6144	80.6667	33.257	36.67
16:47:08	215.729	27.6425	80.75	33.257	36.67
16:52:08	217.539	27.8631	80.8333	33.257	36.698
16:57:08	217.614	27.8678	80.9167	33.23	36.67
17:02:08	218.045	27.9194	81	33.257	36.726
17:07:08	218.164	27.9358	81.0833	33.257	36.726
17:12:08	218.304	27.9569	81.1667	33.283	36.754
17:17:08	217.614	27.8701	81.25	33.283	36.726
17:22:08	216.892	27.7833	81.3333	33.283	36.726
17:27:08	217.032	27.7997	81.4167	33.31	36.754
17:32:08	217.291	27.8349	81.5	33.283	36.726
17:37:08	217.647	27.8748	81.5833	33.283	36.726
17:42:08	217.367	27.842	81.6667	33.31	36.754
17:47:08	217.323	27.8302	81.75	33.283	36.726
17:52:08	217.636	27.8748	81.8333	33.283	36.754
17:57:08	218.239	27.9475	81.9167	33.283	36.754
18:02:08	218.908	28.0273	82	33.283	36.782
18:07:08	219.069	28.0461	82.0833	33.31	36.809
18:12:08	218.843	28.0203	82.1667	33.336	36.837
18:17:08	218.821	28.0156	82.25	33.363	36.837
18:22:08	219.274	28.0696	82.3333	33.363	36.893
18:27:08	219.188	28.0602	82.4167	33.389	36.893
18:32:08	219.414	28.086	82.5	33.389	36.893
18:37:08	218.908	28.0273	82.5833	33.389	36.893
18:42:08	218.821	28.0156	82.6667	33.416	36.921
18:47:08	218.908	28.0297	82.75	33.389	36.893
18:52:08	219.026	28.0414	82.8333	33.416	36.921
18:57:08	219.242	28.0625	82.9167	33.416	36.921
19:02:08	219.295	28.0719	83	33.442	36.949
19:07:08	219.78	28.1306	83.0833	33.442	36.949
19:12:08	220.179	28.1775	83.1667	33.442	36.976
19:17:08	220.071	28.1634	83.25	33.469	37.004
19:22:08	220.179	28.1704	83.3333	33.495	37.004
19:27:08	220.395	28.1986	83.4167	33.495	37.032
19:32:08	220.459	28.208	83.5	33.495	37.032
19:37:08	220.416	28.2056	83.5833	33.549	37.06
19:42:08	220.373	28.1986	83.6667	33.522	37.06
19:47:08	218.767	28.0109	83.75	33.549	37.032
19:52:08	217.895	27.9006	83.8333	33.549	37.004
19:57:08	218.261	27.9475	83.9167	33.522	37.004
20:02:08	218.509	27.9734	84	33.522	37.004
20:07:08	218.735	28.0062	84.0833	33.522	37.004
20:12:08	219.252	28.0696	84.1667	33.495	37.004
20:17:08	219.112	28.0508	84.25	33.522	37.004
20:22:08	218.972	28.032	84.3333	33.522	37.004
20:27:08	219.177	28.0555	84.4167	33.522	37.004
20:32:08	219.479	28.0883	84.5	33.522	37.032
20:37:08	219.511	28.0954	84.5833	33.522	37.032
20:42:08	219.662	28.1141	84.6667	33.549	37.06
20:47:08	219.716	28.1212	84.75	33.549	37.06
20:52:08	219.802	28.1306	84.8333	33.549	37.06
20:57:08	220.028	28.1587	84.9167	33.575	37.088
21:02:08	219.942	28.1493	85	33.575	37.088
21:07:08	219.727	28.1165	85.0833	33.575	37.088
21:12:08	220.071	28.1657	85.1667	33.575	37.116
21:17:08	220.362	28.1962	85.25	33.602	37.116
21:22:08	220.373	28.1986	85.3333	33.602	37.144
21:27:08	218.994	28.0391	85.4167	33.602	37.116
21:32:08	217.754	27.8912	85.5	33.602	37.06
21:37:08	217.733	27.8819	85.5833	33.602	37.06
21:42:08	217.895	27.903	85.6667	33.575	37.032
21:47:08	218.261	27.9475	85.75	33.549	37.032
21:52:08	218.757	28.0062	85.8333	33.575	37.06
21:57:08	218.929	28.0226	85.9167	33.549	37.06
22:02:08	219.242	28.0625	86	33.549	37.06
22:07:08	218.832	28.0109	86.0833	33.575	37.06
22:12:08	219.414	28.0813	86.1667	33.575	37.088
22:17:08	219.554	28.1024	86.25	33.575	37.06
22:22:08	219.425	28.086	86.3333	33.575	37.088
22:27:08	219.134	28.0508	86.4167	33.602	37.088
22:32:08	219.005	28.0344	86.5	33.602	37.088
22:37:08	219.102	28.0461	86.5833	33.575	37.06
22:42:08	218.972	28.0297	86.6667	33.602	37.088
22:47:08	219.813	28.1282	86.75	33.602	37.088
22:52:08	219.877	28.1399	86.8333	33.575	37.088
22:57:08	220.071	28.1657	86.9167	33.602	37.144
23:02:08	220.179	28.1751	87	33.602	37.144
23:07:08	220.632	28.2267	87.0833	33.628	37.172
23:12:08	220.621	28.2291	87.1667	33.628	37.172
23:17:08	220.739	28.2432	87.25	33.655	37.2
23:22:08	220.621	28.2314	87.3333	33.655	37.2
23:27:08	220.384	28.2033	87.4167	33.682	37.2
23:32:08	220.405	28.2033	87.5	33.682	37.228
23:37:08	220.47	28.2103	87.5833	33.682	37.228
23:42:08	220.255	28.1869	87.6667	33.682	37.2
23:47:08	220.761	28.2432	87.75	33.682	37.228
23:52:08	220.869	28.2596	87.8333	33.708	37.256
23:57:08	218.692	28.0039	87.9167	33.708	37.2
00:02:08	217.377	27.8396	88	33.708	37.144
00:07:08	217.022	27.7997	88.0833	33.655	37.088
00:12:08	216.989	27.795	88.1667	33.628	37.06
00:17:08	217.291	27.8302	88.25	33.628	37.06
00:22:08	217.765	27.8819	88.3333	33.602	37.06
00:27:08	218.132	27.9311	88.4167	33.602	37.06
00:32:08	218.444	27.971	88.5	33.575	37.06
00:37:08	218.638	27.9898	88.5833	33.575	37.06
00:42:08	218.918	28.025	88.6667	33.602	37.088
00:47:08	218.875	28.0203	88.75	33.602	37.088
00:52:08	218.714	27.9992	88.8333	33.602	37.088
00:57:08	218.649	27.9945	88.9167	33.602	37.088
01:02:08	218.67	27.9921	89	33.602	37.088
01:07:08	218.66	27.9921	89.0833	33.602	37.116
01:12:08	218.767	28.0085	89.1667	33.602	37.088
01:17:08	218.681	27.9945	89.25	33.628	37.116
01:22:08	218.767	28.0085	89.3333	33.602	37.06
01:27:08	219.78	28.1282	89.4167	33.602	37.144
01:32:08	219.716	28.1141	89.5	33.628	37.144
01:37:08	219.576	28.1024	89.5833	33.655	37.172
01:42:08	219.64	28.1118	89.6667	33.682	37.172
01:47:08	219.888	28.147	89.75	33.655	37.172
01:52:08	220.039	28.1587	89.8333	33.682	37.2
01:57:08	220.158	28.1751	89.9167	33.682	37.2
02:02:08	220.352	28.1939	90	33.682	37.228
02:07:08	220.265	28.1869	90.0833	33.708	37.228
02:12:08	220.017	28.1587	90.1667	33.708	37.228
02:17:08	219.953	28.154	90.25	33.735	37.256
02:22:08	220.255	28.1916	90.3333	33.708	37.228
02:27:08	220.373	28.2056	90.4167	33.708	37.256
02:32:08	220.071	28.1681	90.5	33.735	37.256
02:37:08	220.168	28.1845	90.5833	33.735	37.256
02:42:08	220.319	28.1962	90.6667	33.762	37.284
02:47:08	220.427	28.2056	90.75	33.762	37.284
02:52:08	220.352	28.1962	90.8333	33.762	37.284
02:57:08	220.395	28.1986	90.9167	33.762	37.312
03:02:08	220.265	28.1845	91	33.762	37.312
03:07:08	220.632	28.2314	91.0833	33.788	37.312
03:12:08	220.459	28.2103	91.1667	33.788	37.312
03:17:08	220.47	28.208	91.25	33.788	37.34
03:22:08	220.416	28.2033	91.3333	33.788	37.312
03:27:08	220.362	28.1939	91.4167	33.815	37.34
03:32:08	220.502	28.215	91.5	33.788	37.34
03:37:08	220.47	28.2127	91.5833	33.788	37.34
03:42:08	220.459	28.2056	91.6667	33.788	37.34
03:47:08	220.341	28.1892	91.75	33.815	37.368
03:52:08	220.589	28.2221	91.8333	33.842	37.368
03:57:08	220.47	28.208	91.9167	33.815	37.34
04:02:08	220.524	28.215	92	33.842	37.368
04:07:08	220.395	28.2033	92.0833	33.815	37.368
04:12:08	220.578	28.2244	92.1667	33.842	37.368
04:17:08	220.739	28.2432	92.25	33.842	37.368
04:22:08	220.761	28.2479	92.3333	33.842	37.368
04:27:08	220.546	28.2197	92.4167	33.842	37.368
04:32:08	220.524	28.215	92.5	33.842	37.396
04:37:08	220.492	28.215	92.5833	33.842	37.396
04:42:08	220.621	28.2267	92.6667	33.868	37.396
04:47:08	220.729	28.2408	92.75	33.868	37.424
04:52:08	220.847	28.2549	92.8333	33.868	37.424
04:57:08	220.632	28.2291	92.9167	33.868	37.396
05:02:08	220.416	28.2056	93	33.868	37.396
05:07:08	220.265	28.1845	93.0833	33.868	37.396
05:12:08	220.438	28.2056	93.1667	33.868	37.396
05:17:08	220.298	28.1869	93.25	33.868	37.396
05:22:08	220.061	28.1611	93.3333	33.895	37.424
05:27:08	219.727	28.1212	93.4167	33.868	37.396
05:32:08	219.425	28.086	93.5	33.868	37.368
05:37:08	219.392	28.0813	93.5833	33.842	37.34
05:42:08	218.886	28.0179	93.6667	33.842	37.34
05:47:08	219.026	28.0367	93.75	33.842	37.34
05:52:08	218.541	27.9804	93.8333	33.842	37.312
05:57:08	217.981	27.9124	93.9167	33.842	37.284
06:02:08	217.744	27.8912	94	33.815	37.284
06:07:08	217.162	27.8138	94.0833	33.788	37.228
06:12:08	216.72	27.7622	94.1667	33.762	37.2
06:17:08	215.696	27.6332	94.25	33.762	37.172
06:22:08	215.545	27.6214	94.3333	33.735	37.116
06:27:08	215.535	27.6191	94.4167	33.682	37.088
06:32:08	216.817	27.7669	94.5	33.682	37.088
06:37:08	218.778	27.9992	94.5833	33.655	37.144
06:42:08	219.263	28.0625	94.6667	33.682	37.172
06:47:08	219.295	28.0649	94.75	33.708	37.2
06:52:08	219.069	28.0414	94.8333	33.708	37.2
06:57:08	218.595	27.9827	94.9167	33.708	37.228
07:02:08	217.388	27.8396	95	33.735	37.2
07:07:08	215.976	27.673	95.0833	33.735	37.144
07:12:08	215.524	27.6167	95.1667	33.708	37.088
07:17:08	217.356	27.8326	95.25	33.682	37.144
07:22:08	216.785	27.7692	95.3333	33.655	37.088
07:27:08	217.485	27.8514	95.4167	33.655	37.116
07:32:08	217.14	27.8138	95.5	33.655	37.088
07:37:08	217.108	27.8068	95.5833	33.655	37.116
07:42:08	216.882	27.7786	95.6667	33.655	37.088
07:47:08	217.42	27.8443	95.75	33.655	37.088
07:52:08	217.485	27.856	95.8333	33.628	37.088
07:57:08	217.162	27.8185	95.9167	33.655	37.088
08:02:08	216.839	27.7857	96	33.655	37.088
08:07:08	216.429	27.7317	96.0833	33.655	37.06
08:12:08	214.953	27.5604	96.1667	33.655	37.032
08:17:08	214.931	27.5557	96.25	33.628	37.004
08:22:08	228.757	5.5534	96.3333	33.575	34.7
08:27:08	231.613	0	96.4167	33.283	33.336
08:32:08	230.966	0	96.5	31.787	31.839
08:37:08	230.514	0	96.5833	30.933	30.984
08:42:08	231.731	0	96.6667	30.035	30.086
08:47:08	231.645	0	96.75	29.349	29.4
08:52:08	231.106	0	96.8333	28.743	28.793
08:57:08	231.063	0	96.9167	28.215	28.265
09:02:08	231.57	0	97	27.765	27.79
09:07:08	231.656	0	97.0833	27.366	27.391
09:12:08	231.796	0	97.1667	26.968	27.018
09:17:08	231.99	0	97.25	26.647	26.696
09:22:08	231.623	0	97.3333	26.35	26.399
09:27:08	231.57	0	97.4167	26.079	26.128
09:32:08	231.365	0	97.5	25.833	25.858
09:37:08	231.742	0	97.5833	25.587	25.612
09:42:08	231.925	0	97.6667	25.391	25.416
09:47:08	231.882	0	97.75	25.195	25.22
09:52:08	231.408	0	97.8333	25	25.024
09:57:08	230.88	0	97.9167	24.829	24.853
10:02:08	230.718	0	98	24.658	24.682
10:07:08	230.158	0	98.0833	24.487	24.512
10:12:08	229.888	0	98.1667	24.341	24.39
10:17:08	231.214	0	98.25	24.22	24.244
10:22:08	230.589	0	98.3333	24.074	24.123
10:27:08	230.988	0	98.4167	23.953	23.977
10:32:08	231.095	0	98.5	23.831	23.855
10:37:08	230.761	0	98.5833	23.734	23.758
10:42:08	231.052	0	98.6667	23.613	23.637
10:47:08	231.343	0	98.75	23.492	23.516
10:52:08	231.085	0	98.8333	23.395	23.419
10:57:08	231.279	0	98.9167	23.298	23.323
11:02:08	231.893	0	99	23.202	23.226
11:07:08	231.386	0	99.0833	23.105	23.129
11:12:08	231.656	0	99.1667	23.032	23.057
11:17:08	232.486	0	99.25	22.96	22.984
11:22:08	232.895	0	99.3333	22.863	22.888
11:27:08	233.057	0	99.4167	22.791	22.791
11:32:08	232.744	0	99.5	22.719	22.743
11:37:08	233.035	0	99.5833	22.646	22.671
11:42:08	232.906	0	99.6667	22.55	22.598
11:47:08	233.132	0	99.75	22.502	22.526
11:52:08	233.014	0	99.8333	22.43	22.454
11:57:08	233.014	0	99.9167	22.357	22.381
12:02:08	230.643	0	100	22.309	22.309
12:07:08	230.373	0	100.083	22.237	22.261
12:12:08	230.298	0	100.167	22.165	22.189
12:17:08	230.718	0	100.25	22.117	22.141
12:22:08	230.761	0	100.333	22.069	22.069
12:27:08	230.309	0	100.417	21.997	22.021
12:32:08	230.126	0	100.5	21.948	21.972
12:37:08	229.921	0	100.583	21.876	21.9
12:42:08	230.018	0	100.667	21.828	21.852
12:47:08	230.039	0	100.75	21.78	21.804
12:52:08	230.363	0	100.833	21.732	21.756
12:57:08	231.117	0	100.917	21.684	21.708
13:02:08	231.128	0	101	21.636	21.636
13:07:08	230.524	0	101.083	21.588	21.612
13:12:08	230.266	0	101.167	21.54	21.564
13:17:08	230.535	0	101.25	21.516	21.516
13:22:08	230.46	0	101.333	21.444	21.468
13:27:08	230.794	0	101.417	21.42	21.444
13:32:08	230.901	0	101.5	21.372	21.396
13:37:08	229.867	0	101.583	21.324	21.348
13:42:08	231.57	0	101.667	21.276	21.3
13:47:08	231.537	0	101.75	21.253	21.253
13:52:08	231.386	0	101.833	21.205	21.229
13:57:08	231.753	0	101.917	21.181	21.181
14:02:08	231.451	0	102	21.133	21.157
14:07:08	231.537	0	102.083	21.085	21.109
14:12:08	231.796	0	102.167	21.037	21.061
14:17:08	231.419	0	102.25	21.013	21.037
14:22:08	231.516	0	102.333	20.989	20.989
14:27:08	232.292	0	102.417	20.941	20.965
14:32:08	232.324	0	102.5	20.917	20.941
14:37:08	232.432	0	102.583	20.869	20.893
14:42:08	232.927	0	102.667	20.845	20.869
14:47:08	232.787	0	102.75	20.798	20.821
14:52:08	233.24	0	102.833	20.774	20.798
14:57:08	233.542	0	102.917	20.75	20.75
15:02:08	233.703	0	103	20.726	20.75
15:07:08	233.94	0	103.083	20.678	20.702
15:12:08	234.145	0	103.167	20.654	20.654
15:17:08	234.813	0	103.25	20.63	20.654
15:22:08	234.231	0	103.333	20.606	20.606
15:27:08	234.285	0	103.417	20.558	20.582
15:32:08	234.231	0	103.5	20.534	20.558
15:37:08	233.865	0	103.583	20.511	20.534
15:42:08	233.38	0	103.667	20.487	20.487
15:47:08	232.421	0	103.75	20.439	20.463
15:52:08	231.44	0	103.833	20.439	20.463
15:57:08	232.777	0	103.917	20.415	20.415
16:02:08	231.613	0	104	20.367	20.391
16:07:08	232.011	0	104.083	20.343	20.367
16:12:08	232.281	0	104.167	20.319	20.343
16:17:08	232.27	0	104.25	20.295	20.319
16:22:08	231.742	0	104.333	20.272	20.295
16:27:08	231.99	0	104.417	20.248	20.272
16:32:08	232.345	0	104.5	20.224	20.248
16:37:08	232.453	0	104.583	20.2	20.224
16:42:08	232.389	0	104.667	20.176	20.2
16:47:08	232.701	0	104.75	20.152	20.152
16:52:08	232.82	0	104.833	20.128	20.152
16:57:08	233.186	0	104.917	20.104	20.128
17:02:08	233.509	0	105	20.081	20.104
17:07:08	233.8	0	105.083	20.057	20.081
17:12:08	233.962	0	105.167	20.033	20.033
17:17:08	233.8	0	105.25	20.009	20.033
17:22:08	233.833	0	105.333	19.985	20.009
17:27:08	233.919	0	105.417	19.961	19.985
17:32:08	234.296	0	105.5	19.937	19.961
17:37:08	233.811	0	105.583	19.913	19.913
17:42:08	234.037	0	105.667	19.89	19.913
17:47:08	234.156	0	105.75	19.89	19.913
17:52:08	234.167	0	105.833	19.842	19.866
17:57:08	233.951	0	105.917	19.818	19.842
18:02:08	234.253	0	106	19.818	19.842
18:07:08	234.641	0	106.083	19.794	19.818
18:12:08	235.093	0	106.167	19.77	19.794
18:17:08	234.856	0	106.25	19.746	19.77
18:22:08	234.792	0	106.333	19.746	19.77
18:27:08	234.889	0	106.417	19.723	19.746
18:32:08	233.208	0	106.5	19.699	19.723
18:37:08	232.529	0	106.583	19.675	19.699
18:42:08	232.669	0	106.667	19.651	19.675
18:47:08	232.895	0	106.75	19.627	19.651
18:52:08	232.863	0	106.833	19.627	19.651
18:57:08	232.733	0	106.917	19.603	19.627
19:02:08	233.455	0	107	19.579	19.603
19:07:08	233.552	0	107.083	19.579	19.579
19:12:08	233.423	0	107.167	19.556	19.579
19:17:08	233.843	0	107.25	19.532	19.556
19:22:08	234.037	0	107.333	19.508	19.532
19:27:08	233.983	0	107.417	19.508	19.508
19:32:08	233.833	0	107.5	19.484	19.508
19:37:08	234.264	0	107.583	19.46	19.484
19:42:08	234.49	0	107.667	19.436	19.46
19:47:08	234.576	0	107.75	19.436	19.46
19:52:08	234.781	0	107.833	19.413	19.436
19:57:08	234.824	0	107.917	19.389	19.413
20:02:08	234.221	0	108	19.389	19.413
20:07:08	234.662	0	108.083	19.365	19.389
20:12:08	235.223	0	108.167	19.341	19.365
20:17:08	235.578	0	108.25	19.341	19.365
20:22:08	235.589	0	108.333	19.317	19.341
20:27:08	235.589	0	108.417	19.293	19.341
20:32:08	235.578	0	108.5	19.293	19.317
20:37:08	235.309	0	108.583	19.27	19.293
20:42:08	232.927	0	108.667	19.27	19.27
20:47:08	233.1	0	108.75	19.246	19.27
20:52:08	233.52	0	108.833	19.222	19.246
20:57:08	233.789	0	108.917	19.222	19.246
21:02:08	232.82	0	109	19.198	19.222
21:07:08	232.442	0	109.083	19.174	19.198
21:12:08	232.755	0	109.167	19.174	19.174
21:17:08	232.777	0	109.25	19.15	19.174
21:22:08	232.938	0	109.333	19.15	19.174
21:27:08	233.154	0	109.417	19.127	19.174
21:32:08	233.455	0	109.5	19.127	19.15
21:37:08	233.402	0	109.583	19.103	19.127
21:42:08	233.649	0	109.667	19.079	19.103
21:47:08	233.962	0	109.75	19.079	19.103
21:52:08	234.436	0	109.833	19.055	19.079
21:57:08	234.792	0	109.917	19.055	19.079
22:02:08	234.63	0	110	19.031	19.055
22:07:08	234.792	0	110.083	19.031	19.031
22:12:08	234.759	0	110.167	19.007	19.031
22:17:08	234.824	0	110.25	18.984	19.007
22:22:08	234.964	0	110.333	18.984	19.007
22:27:08	234.824	0	110.417	18.96	18.984
22:32:08	235.126	0	110.5	18.96	18.984
22:37:08	235.395	0	110.583	18.936	18.96
22:42:08	235.212	0	110.667	18.936	18.96
22:47:08	232.539	0	110.75	18.912	18.936
22:52:08	232.701	0	110.833	18.912	18.936
22:57:08	232.873	0	110.917	18.888	18.912
23:02:08	231.936	0	111	18.888	18.888
23:07:08	232.367	0	111.083	18.865	18.888
23:12:08	232.647	0	111.167	18.841	18.865
23:17:08	233.445	0	111.25	18.841	18.865
23:22:08	233.628	0	111.333	18.817	18.841
23:27:08	233.628	0	111.417	18.817	18.841
23:32:08	233.962	0	111.5	18.793	18.817
23:37:08	234.102	0	111.583	18.793	18.793
23:42:08	234.544	0	111.667	18.793	18.817
23:47:08	234.371	0	111.75	18.769	18.793
23:52:08	234.533	0	111.833	18.769	18.793
23:57:08	234.598	0	111.917	18.746	18.769
00:02:08	234.684	0	112	18.746	18.769
00:07:08	234.846	0	112.083	18.722	18.746
00:12:08	235.126	0	112.167	18.722	18.746
00:17:08	235.061	0	112.25	18.698	18.722
00:22:08	235.374	0	112.333	18.698	18.722
00:27:08	235.33	0	112.417	18.674	18.698
00:32:08	235.169	0	112.5	18.674	18.698
00:37:08	235.255	0	112.583	18.674	18.698
00:42:08	235.33	0	112.667	18.65	18.674
00:47:08	235.514	0	112.75	18.626	18.65
00:52:08	235.255	0	112.833	18.626	18.65
00:57:08	235.093	0	112.917	18.626	18.65
01:02:08	235.718	0	113	18.603	18.626
01:07:08	235.955	0	113.083	18.603	18.626
01:12:08	235.945	0	113.167	18.603	18.626
01:17:08	234.716	0	113.25	18.579	18.579
01:22:08	233.089	0	113.333	18.579	18.579
01:27:08	233.154	0	113.417	18.555	18.579
01:32:08	232.744	0	113.5	18.555	18.555
01:37:08	232.766	0	113.583	18.531	18.555
01:42:08	233.197	0	113.667	18.531	18.531
01:47:08	233.208	0	113.75	18.531	18.555
01:52:08	233.175	0	113.833	18.507	18.507
01:57:08	233.111	0	113.917	18.484	18.507
02:02:08	233.1	0	114	18.484	18.507
02:07:08	232.669	0	114.083	18.484	18.507
02:12:08	232.669	0	114.167	18.46	18.484
02:17:08	232.389	0	114.25	18.46	18.46
02:22:08	232.938	0	114.333	18.436	18.46
02:27:08	232.712	0	114.417	18.436	18.46
02:32:08	232.787	0	114.5	18.412	18.436
02:37:08	232.701	0	114.583	18.412	18.436
02:42:08	232.82	0	114.667	18.412	18.436
02:47:08	232.442	0	114.75	18.388	18.412
02:52:08	232.938	0	114.833	18.388	18.412
02:57:08	232.55	0	114.917	18.388	18.412
03:02:08	231.861	0	115	18.365	18.388
03:07:08	231.958	0	115.083	18.365	18.388
03:12:08	231.839	0	115.167	18.341	18.365
03:17:08	231.925	0	115.25	18.341	18.365
03:22:08	232.27	0	115.333	18.317	18.341
03:27:08	232.561	0	115.417	18.317	18.341
03:32:08	232.421	0	115.5	18.317	18.341
03:37:08	232.367	0	115.583	18.317	18.341
03:42:08	232.108	0	115.667	18.293	18.317
03:47:08	232.195	0	115.75	18.293	18.317
03:52:08	232.162	0	115.833	18.27	18.293
03:57:08	232.119	0	115.917	18.27	18.293
04:02:08	232.302	0	116	18.246	18.27
04:07:08	232.238	0	116.083	18.246	18.27
04:12:08	231.613	0	116.167	18.246	18.246
04:17:08	231.699	0	116.25	18.246	18.27
04:22:08	231.656	0	116.333	18.222	18.246
04:27:08	231.591	0	116.417	18.222	18.222
04:32:08	231.085	0	116.5	18.198	18.222
04:37:08	230.46	0	116.583	18.198	18.222
04:42:08	230.352	0	116.667	18.174	18.198
04:47:08	229.888	0	116.75	18.174	18.198
04:52:08	229.824	0	116.833	18.174	18.198
04:57:08	232.054	0	116.917	18.151	18.174
05:02:08	231.052	0	117	18.151	18.174
05:07:08	230.632	0	117.083	18.151	18.174
05:12:08	230.514	0	117.167	18.127	18.151
05:17:08	230.557	0	117.25	18.127	18.151
05:22:08	230.804	0	117.333	18.127	18.151
05:27:08	231.936	0	117.417	18.127	18.127
05:32:08	231.591	0	117.5	18.103	18.127
05:37:08	230.912	0	117.583	18.103	18.127
05:42:08	230.546	0	117.667	18.079	18.103
05:47:08	230.47	0	117.75	18.079	18.103
05:52:08	230.363	0	117.833	18.079	18.103
05:57:08	230.061	0	117.917	18.055	18.079
06:02:08	229.856	0	118	18.055	18.079
06:07:08	231.386	0	118.083	18.055	18.079
06:12:08	231.171	0	118.167	18.055	18.055
06:17:08	230.707	0	118.25	18.055	18.055
06:22:08	230.32	0	118.333	18.032	18.055
06:27:08	230.223	0	118.417	18.032	18.032
06:32:08	230.093	0	118.5	18.008	18.032
06:37:08	230.417	0	118.583	18.008	18.032
06:42:08	230.266	0	118.667	18.008	18.008
06:47:08	229.641	0	118.75	17.984	18.008
06:52:08	231.419	0	118.833	17.984	18.008
06:57:08	232.259	0	118.917	17.984	17.984
07:02:08	231.893	0	119	17.984	17.984
07:07:08	231.537	0	119.083	17.96	17.96
07:12:08	230.417	0	119.167	17.96	17.984
07:17:08	230.179	0	119.25	17.96	17.984
07:22:08	230.179	0	119.333	17.936	17.96
07:27:08	230.072	0	119.417	17.936	17.96
07:32:08	229.016	0	119.5	17.936	17.96
07:37:08	229.339	0	119.583	17.913	17.936
07:42:08	229.253	0	119.667	17.913	17.936
07:47:08	229.565	0	119.75	17.913	17.936
07:52:08	230.029	0	119.833	17.913	17.913
07:57:08	229.856	0	119.917	17.889	17.913
08:02:08	229.932	0	120	17.889	17.913
08:07:08	229.835	0	120.083	17.889	17.913
08:12:08	230.029	0	120.167	17.865	17.889
08:17:08	229.727	0	120.25	17.865	17.889
08:22:08	229.878	0	120.333	17.865	17.889
08:27:08	229.921	0	120.417	17.865	17.865
08:32:08	229.932	0	120.5	17.841	17.865
08:37:08	230.061	0	120.583	17.841	17.865
08:42:08	229.77	0	120.667	17.841	17.841
08:47:08	229.791	0	120.75	17.841	17.841
08:52:08	230.061	0	120.833	17.818	17.841
08:57:08	230.481	0	120.917	17.818	17.841
09:02:08	231.02	0	121	17.818	17.841
09:07:08	231.225	0	121.083	17.794	17.818
09:12:08	231.268	0	121.167	17.794	17.818
09:17:08	230.998	0	121.25	17.794	17.818
09:22:08	231.16	0	121.333	17.77	17.794
09:27:08	230.147	0	121.417	17.77	17.794
09:32:08	229.598	0	121.5	17.77	17.794
09:37:08	229.781	0	121.583	17.77	17.794
09:42:08	230.427	0	121.667	17.77	17.794
09:47:08	230.427	0	121.75	17.746	17.77
09:52:08	230.276	0	121.833	17.746	17.77
09:57:08	230.05	0	121.917	17.746	17.746
10:02:08	229.996	0	122	17.746	17.746
10:07:08	229.533	0	122.083	17.722	17.746
10:12:08	229.759	0	122.167	17.722	17.746
10:17:08	229.942	0	122.25	17.722	17.746
10:22:08	229.964	0	122.333	17.722	17.722
10:27:08	230.179	0	122.417	17.699	17.722
10:32:08	229.748	0	122.5	17.699	17.722
10:37:08	229.501	0	122.583	17.699	17.699
10:42:08	229.748	0	122.667	17.675	17.699
10:47:08	230.438	0	122.75	17.675	17.699
10:52:08	230.815	0	122.833	17.675	17.675
10:57:08	230.621	0	122.917	17.675	17.675
11:02:08	230.912	0	123	17.675	17.675
11:07:08	230.955	0	123.083	17.675	17.675
11:12:08	231.139	0	123.167	17.651	17.651
11:17:08	231.095	0	123.25	17.627	17.651
11:22:08	230.115	0	123.333	17.651	17.651
11:27:08	230.546	0	123.417	17.627	17.651
11:32:08	230.578	0	123.5	17.627	17.651
11:37:08	230.923	0	123.583	17.627	17.651
11:42:08	230.675	0	123.667	17.627	17.651
11:47:08	230.632	0	123.75	17.627	17.627
11:52:08	230.395	0	123.833	17.603	17.627
11:57:08	230.33	0	123.917	17.603	17.627
12:02:08	230.384	0	124	17.603	17.627
12:07:08	230.557	0	124.083	17.603	17.627
12:12:08	230.837	0	124.167	17.603	17.603
12:17:08	231.052	0	124.25	17.58	17.603
12:22:08	231.042	0	124.333	17.58	17.603
12:27:08	231.3	0	124.417	17.58	17.58
12:32:08	231.225	0	124.5	17.58	17.58
12:37:08	231.559	0	124.583	17.556	17.58
12:42:08	231.699	0	124.667	17.556	17.556
12:47:08	231.699	0	124.75	17.556	17.58
12:52:08	231.958	0	124.833	17.556	17.556
12:57:08	232.421	0	124.917	17.556	17.58
13:02:08	231.861	0	125	17.532	17.556
13:07:08	231.591	0	125.083	17.532	17.556
13:12:08	232.054	0	125.167	17.532	17.556
13:17:08	232.399	0	125.25	17.532	17.532
13:22:08	232.345	0	125.333	17.532	17.556
13:27:08	232.345	0	125.417	17.508	17.532
13:32:08	232.065	0	125.5	17.508	17.532
13:37:08	231.839	0	125.583	17.508	17.532
13:42:08	232.216	0	125.667	17.508	17.508
13:47:08	232.906	0	125.75	17.508	17.532
13:52:08	232.561	0	125.833	17.508	17.508
13:57:08	233.38	0	125.917	17.485	17.508
14:02:08	233.499	0	126	17.485	17.485
14:07:08	233.477	0	126.083	17.485	17.508
14:12:08	233.639	0	126.167	17.485	17.485
14:17:08	233.434	0	126.25	17.485	17.508
14:22:08	233.563	0	126.333	17.461	17.485
14:27:08	233.994	0	126.417	17.461	17.485
14:32:08	233.574	0	126.5	17.461	17.485
14:37:08	233.639	0	126.583	17.461	17.461
14:42:08	234.511	0	126.667	17.437	17.437
14:47:08	234.608	0	126.75	17.437	17.437
14:52:08	235.072	0	126.833	17.437	17.461
14:57:08	235.093	0	126.917	17.437	17.461
15:02:08	231.731	0	127	17.437	17.437
15:07:08	231.774	0	127.083	17.437	17.437
15:12:08	231.106	0	127.167	17.413	17.437
15:17:08	231.074	0	127.25	17.413	17.413
15:22:08	230.88	0	127.333	17.413	17.413
15:27:08	231.009	0	127.417	17.413	17.413
15:32:08	230.826	0	127.5	17.389	17.413
15:37:08	230.869	0	127.583	17.389	17.413
15:42:08	230.266	0	127.667	17.389	17.389
15:47:08	230.449	0	127.75	17.389	17.413
15:52:08	231.559	0	127.833	17.389	17.389
15:57:08	232.96	0	127.917	17.366	17.389
16:02:08	232.841	0	128	17.366	17.389
16:07:08	232.744	0	128.083	17.366	17.389
16:12:08	232.561	0	128.167	17.366	17.389
16:17:08	232.507	0	128.25	17.366	17.366
16:22:08	232.399	0	128.333	17.366	17.389
16:27:08	232.518	0	128.417	17.342	17.366
16:32:08	232.496	0	128.5	17.342	17.366
16:37:08	232.798	0	128.583	17.342	17.366
16:42:08	232.723	0	128.667	17.342	17.366
16:47:08	232.367	0	128.75	17.318	17.342
16:52:08	232.949	0	128.833	17.318	17.342
16:57:08	233.455	0	128.917	17.318	17.342
17:02:08	233.962	0	129	17.318	17.342
17:07:08	234.285	0	129.083	17.318	17.342
17:12:08	234.662	0	129.167	17.318	17.318
17:17:08	234.781	0	129.25	17.318	17.318
17:22:08	234.759	0	129.333	17.318	17.342
17:27:08	234.792	0	129.417	17.294	17.294
17:32:08	234.555	0	129.5	17.294	17.294
17:37:08	234.317	0	129.583	17.294	17.294
17:42:08	234.382	0	129.667	17.294	17.294
17:47:08	234.727	0	129.75	17.294	17.294
17:52:08	235.072	0	129.833	17.271	17.294
17:57:08	235.277	0	129.917	17.271	17.294
18:02:08	235.309	0	130	17.271	17.294
18:07:08	235.772	0	130.083	17.271	17.294
18:12:08	235.686	0	130.167	17.247	17.271
18:17:08	234.522	0	130.25	17.247	17.271
18:22:08	233.251	0	130.333	17.247	17.271
18:27:08	233.143	0	130.417	17.247	17.247
18:32:08	233.391	0	130.5	17.247	17.271
18:37:08	233.445	0	130.583	17.223	17.247
18:42:08	233.52	0	130.667	17.223	17.247
18:47:08	233.897	0	130.75	17.223	17.247
18:52:08	233.94	0	130.833	17.223	17.247
18:57:08	233.434	0	130.917	17.223	17.247
19:02:08	233.466	0	131	17.223	17.223
19:07:08	233.412	0	131.083	17.199	17.223
19:12:08	233.294	0	131.167	17.223	17.247
19:17:08	233.876	0	131.25	17.199	17.223
19:22:08	234.285	0	131.333	17.199	17.223
19:27:08	234.059	0	131.417	17.199	17.199
19:32:08	234.382	0	131.5	17.199	17.199
19:37:08	234.705	0	131.583	17.175	17.199
19:42:08	234.727	0	131.667	17.175	17.199
19:47:08	234.835	0	131.75	17.175	17.199
19:52:08	234.996	0	131.833	17.175	17.199
19:57:08	234.932	0	131.917	17.175	17.199
20:02:08	233.876	0	132	17.175	17.199
20:07:08	233.843	0	132.083	17.152	17.175
20:12:08	234.49	0	132.167	17.152	17.175
20:17:08	234.889	0	132.25	17.152	17.175
20:22:08	235.406	0	132.333	17.152	17.152
20:27:08	235.535	0	132.417	17.152	17.175
20:32:08	235.438	0	132.5	17.128	17.152
20:37:08	235.751	0	132.583	17.128	17.152
20:42:08	234.35	0	132.667	17.128	17.152
20:47:08	233.455	0	132.75	17.128	17.152
20:52:08	233.746	0	132.833	17.128	17.152
20:57:08	233.854	0	132.917	17.128	17.152
21:02:08	233.897	0	133	17.128	17.128
21:07:08	234.167	0	133.083	17.128	17.128
21:12:08	234.544	0	133.167	17.128	17.152
21:17:08	234.619	0	133.25	17.104	17.128
21:22:08	234.619	0	133.333	17.104	17.128
21:27:08	234.555	0	133.417	17.104	17.104
21:32:08	234.07	0	133.5	17.104	17.104
21:37:08	234.167	0	133.583	17.104	17.104
21:42:08	234.479	0	133.667	17.08	17.104
21:47:08	234.522	0	133.75	17.08	17.104
21:52:08	234.932	0	133.833	17.08	17.104
21:57:08	235.083	0	133.917	17.08	17.104
22:02:08	235.255	0	134	17.08	17.08
22:07:08	235.826	0	134.083	17.08	17.08
22:12:08	232.669	0	134.167	17.057	17.08
22:17:08	232.992	0	134.25	17.057	17.08
22:22:08	233.1	0	134.333	17.057	17.08
22:27:08	233.391	0	134.417	17.057	17.08
22:32:08	233.488	0	134.5	17.057	17.057
22:37:08	233.542	0	134.583	17.057	17.057
22:42:08	233.692	0	134.667	17.057	17.057
22:47:08	233.757	0	134.75	17.033	17.057
22:52:08	234.048	0	134.833	17.033	17.057
22:57:08	234.317	0	134.917	17.033	17.057
23:02:08	233.908	0	135	17.033	17.033
23:07:08	233.52	0	135.083	17.009	17.033
23:12:08	233.951	0	135.167	17.009	17.033
23:17:08	233.983	0	135.25	17.009	17.033
23:22:08	234.317	0	135.333	17.009	17.033
23:27:08	234.328	0	135.417	17.009	17.033
23:32:08	235.029	0	135.5	17.009	17.033
23:37:08	235.018	0	135.583	17.009	17.009
23:42:08	234.727	0	135.667	17.009	17.009
23:47:08	234.641	0	135.75	17.009	17.009
23:52:08	235.158	0	135.833	17.009	17.009
23:57:08	235.158	0	135.917	17.009	17.009
00:02:08	234.124	0	136	16.985	17.009
00:07:08	233.994	0	136.083	16.985	17.009
00:12:08	234.145	0	136.167	16.985	16.985
00:17:08	234.738	0	136.25	16.985	17.009
00:22:08	235.018	0	136.333	16.961	16.985
00:27:08	234.878	0	136.417	16.985	16.985
00:32:08	235.19	0	136.5	16.961	16.985
00:37:08	234.802	0	136.583	16.961	16.985
00:42:08	234.673	0	136.667	16.961	16.985
00:47:08	234.781	0	136.75	16.961	16.961
00:52:08	235.072	0	136.833	16.961	16.985
00:57:08	234.867	0	136.917	16.938	16.961
01:02:08	234.479	0	137	16.961	16.961
01:07:08	234.533	0	137.083	16.938	16.961
01:12:08	234.813	0	137.167	16.938	16.961
01:17:08	234.932	0	137.25	16.938	16.938
01:22:08	235.654	0	137.333	16.938	16.938
01:27:08	235.093	0	137.417	16.938	16.938
01:32:08	234.856	0	137.5	16.938	16.938
01:37:08	235.115	0	137.583	16.938	16.938
01:42:08	234.943	0	137.667	16.938	16.938
01:47:08	235.158	0	137.75	16.914	16.938
01:52:08	235.643	0	137.833	16.914	16.938
01:57:08	235.115	0	137.917	16.914	16.938
02:02:08	234.813	0	138	16.914	16.938
02:07:08	235.18	0	138.083	16.914	16.914
02:12:08	235.481	0	138.167	16.89	16.914
02:17:08	235.514	0	138.25	16.914	16.938
02:22:08	235.762	0	138.333	16.89	16.914
02:27:08	235.762	0	138.417	16.89	16.914
02:32:08	235.805	0	138.5	16.89	16.89
02:37:08	235.934	0	138.583	16.89	16.914
02:42:08	235.902	0	138.667	16.89	16.914
02:47:08	235.783	0	138.75	16.89	16.89
02:52:08	235.729	0	138.833	16.866	16.89
02:57:08	235.837	0	138.917	16.866	16.89
03:02:08	235.848	0	139	16.89	16.89
03:07:08	235.891	0	139.083	16.866	16.89
03:12:08	235.697	0	139.167	16.866	16.866
03:17:08	235.546	0	139.25	16.866	16.89
03:22:08	235.578	0	139.333	16.866	16.89
03:27:08	235.524	0	139.417	16.843	16.866
03:32:08	235.611	0	139.5	16.866	16.866
03:37:08	235.568	0	139.583	16.866	16.89
03:42:08	235.514	0	139.667	16.843	16.866
03:47:08	235.535	0	139.75	16.843	16.866
03:52:08	235.654	0	139.833	16.843	16.843
03:57:08	235.675	0	139.917	16.843	16.866
04:02:08	235.794	0	140	16.843	16.843
04:07:08	235.762	0	140.083	16.843	16.843
04:12:08	235.406	0	140.167	16.819	16.843
04:17:08	235.6	0	140.25	16.843	16.843
04:22:08	235.546	0	140.333	16.819	16.843
04:27:08	235.74	0	140.417	16.819	16.843
04:32:08	235.503	0	140.5	16.819	16.843
04:37:08	235.363	0	140.583	16.819	16.819
04:42:08	235.578	0	140.667	16.819	16.819
04:47:08	235.104	0	140.75	16.819	16.819
04:52:08	234.975	0	140.833	16.819	16.819
04:57:08	234.156	0	140.917	16.795	16.819
05:02:08	233.358	0	141	16.795	16.819
05:07:08	233.186	0	141.083	16.795	16.819
05:12:08	233.186	0	141.167	16.795	16.795
05:17:08	233.261	0	141.25	16.795	16.819
05:22:08	233.358	0	141.333	16.795	16.795
05:27:08	234.242	0	141.417	16.795	16.795
05:32:08	234.027	0	141.5	16.771	16.795
05:37:08	233.811	0	141.583	16.771	16.795
05:42:08	234.199	0	141.667	16.771	16.795
05:47:08	234.307	0	141.75	16.771	16.795
05:52:08	233.822	0	141.833	16.771	16.795
05:57:08	234.317	0	141.917	16.771	16.771
06:02:08	233.412	0	142	16.771	16.771
06:07:08	233.779	0	142.083	16.771	16.771
06:12:08	233.789	0	142.167	16.771	16.795
06:17:08	233.789	0	142.25	16.747	16.771
06:22:08	233.585	0	142.333	16.747	16.771
06:27:08	233.649	0	142.417	16.747	16.771
06:32:08	233.251	0	142.5	16.747	16.747
06:37:08	233.143	0	142.583	16.747	16.747
06:42:08	232.809	0	142.667	16.747	16.747
06:47:08	232.335	0	142.75	16.747	16.747
06:52:08	232.162	0	142.833	16.724	16.747
06:57:08	232.345	0	142.917	16.747	16.747
07:02:08	232.399	0	143	16.724	16.747
07:07:08	232.238	0	143.083	16.724	16.747
07:12:08	232.486	0	143.167	16.724	16.724
07:17:08	232.151	0	143.25	16.724	16.724
07:22:08	231.882	0	143.333	16.724	16.747
07:27:08	231.688	0	143.417	16.7	16.724
07:32:08	231.699	0	143.5	16.724	16.724
07:37:08	231.871	0	143.583	16.7	16.7
07:42:08	232.076	0	143.667	16.7	16.724
07:47:08	232.227	0	143.75	16.7	16.724
07:52:08	231.936	0	143.833	16.7	16.724
07:57:08	232.119	0	143.917	16.7	16.7
08:02:08	232.141	0	144	16.7	16.7
08:07:08	232.033	0	144.083	16.7	16.724
08:12:08	232.054	0	144.167	16.7	16.724
08:17:08	232.281	0	144.25	16.676	16.7
08:22:08	232.184	0	144.333	16.676	16.7
08:27:08	231.979	0	144.417	16.7	16.7
08:32:08	231.968	0	144.5	16.676	16.7
08:37:08	231.828	0	144.583	16.676	16.7
08:42:08	231.742	0	144.667	16.7	16.7
08:47:08	231.871	0	144.75	16.676	16.7
08:52:08	231.861	0	144.833	16.676	16.676
08:57:08	231.839	0	144.917	16.676	16.7
09:02:08	231.289	0	145	16.676	16.7
09:07:08	231.106	0	145.083	16.652	16.676
09:12:08	231.246	0	145.167	16.652	16.676
09:17:08	231.397	0	145.25	16.652	16.676
09:22:08	231.192	0	145.333	16.652	16.676
09:27:08	231.257	0	145.417	16.652	16.652
09:32:08	231.02	0	145.5	16.652	16.676
09:37:08	230.794	0	145.583	16.652	16.676
09:42:08	230.664	0	145.667	16.652	16.676
09:47:08	230.621	0	145.75	16.652	16.676
09:52:08	232.421	0	145.833	16.652	16.652
09:57:08	233.983	0	145.917	16.629	16.652
10:02:08	234.091	0	146	16.652	16.652
10:07:08	234.048	0	146.083	16.629	16.652
10:12:08	233.886	0	146.167	16.629	16.652
10:17:08	233.843	0	146.25	16.652	16.652
10:22:08	233.563	0	146.333	16.629	16.652
10:27:08	233.628	0	146.417	16.652	16.652
10:32:08	233.8	0	146.5	16.629	16.652
10:37:08	233.682	0	146.583	16.629	16.652
10:42:08	233.542	0	146.667	16.629	16.652
10:47:08	233.768	0	146.75	16.629	16.629
10:52:08	233.93	0	146.833	16.629	16.629
10:57:08	233.994	0	146.917	16.629	16.629
11:02:08	233.606	0	147	16.629	16.629
11:07:08	233.671	0	147.083	16.629	16.652
11:12:08	233.908	0	147.167	16.629	16.629
11:17:08	233.833	0	147.25	16.629	16.629
11:22:08	233.768	0	147.333	16.605	16.629
11:27:08	233.488	0	147.417	16.605	16.629
11:32:08	233.412	0	147.5	16.605	16.629
11:37:08	233.951	0	147.583	16.605	16.629
11:42:08	234.07	0	147.667	16.605	16.629
11:47:08	234.221	0	147.75	16.605	16.629
11:52:08	234.641	0	147.833	16.605	16.605
11:57:08	234.447	0	147.917	16.605	16.605
12:02:08	234.501	0	148	16.605	16.605
12:07:08	234.619	0	148.083	16.605	16.605
12:12:08	234.652	0	148.167	16.605	16.605
12:17:08	234.889	0	148.25	16.581	16.605
12:22:08	234.856	0	148.333	16.581	16.605
12:27:08	234.759	0	148.417	16.581	16.605
12:32:08	234.199	0	148.5	16.581	16.605
12:37:08	234.802	0	148.583	16.605	16.605
12:42:08	234.943	0	148.667	16.605	16.605
12:47:08	235.18	0	148.75	16.605	16.605
12:52:08	234.878	0	148.833	16.581	16.605
12:57:08	235.578	0	148.917	16.581	16.605
13:02:08	235.503	0	149	16.581	16.605
13:07:08	235.115	0	149.083	16.581	16.581
13:12:08	235.438	0	149.167	16.557	16.581
13:17:08	235.611	0	149.25	16.557	16.581
13:22:08	235.471	0	149.333	16.557	16.581
13:27:08	235.32	0	149.417	16.557	16.581
13:32:08	235.309	0	149.5	16.581	16.605
13:37:08	235.632	0	149.583	16.581	16.605
13:42:08	235.665	0	149.667	16.557	16.581
13:47:08	235.643	0	149.75	16.557	16.581
[truncated: 506 more rows]

## Sheet: cxA 6,1kW
Time	Voltage, V	Current, A	Hours	EST, °C	LST, °C	Time	Hours	Tair °C
[truncated: 2,307 more rows]

[truncated: 6 more sheets: cxC 5,4kW, cxA 5,4kW, cxC 4,2kW, cxA 4,2kW, cxC 3,5kW, cxA 3,5kW]
